# Supplementary material for: Enantioselective synthesis of 3-hydroxy- and 3-amino-3-alkynyl-2-oxindoles by the dimethylzinc-mediated addition of terminal alkynes to isatins and isatin-derived ketimines
Source: Royal Society of Chemistry journal article supplement (doi:10.1039/d3ob01023f), 2023-01-01
Supplement: d3ob01023f1.pdf [file d3ob01023f1.pdf]

## Enantioselective synthesis of 3-hydroxy- and 3-amino-3-alkynyl-2-oxindoles by dimethylzinc-mediated addition of terminal alkynes to isatins and isatin-derived ketimines

Elena Prieto, Jorge D. Martín, Javier Nieto\* and Celia Andrés\*

*Instituto CINQUIMA and Departamento de Química Orgánica, Facultad de Ciencias, Universidad de Valladolid, Paseo de Belén, 7, 47011 Valladolid, Spain*

### Table of Contents

|                                                                                                                                                                                                |      |
|------------------------------------------------------------------------------------------------------------------------------------------------------------------------------------------------|------|
| 1. General experimental procedures.....                                                                                                                                                        | S2   |
| 2. Synthesis and characterization data of N-substituted isatins.....                                                                                                                           | S2   |
| 3. General procedure for the catalytic enantioselective alkylation of isatins <b>1a-m</b> and characterization data of compounds <b>2a-f</b> , <b>3a-p</b> , <b>4a-k</b> and <b>5a-b</b> ..... | S5   |
| 4. General procedure for the synthesis of racemic 3-alkynyl-3-hydroxyoxindoles.....                                                                                                            | S18  |
| 5. Synthesis and characterization data of isatin-derived ketimines <b>6a-m</b> .....                                                                                                           | S18  |
| 6. General procedure for the catalytic enantioselective alkylation of isatin-derived ketimines and characterization data of compounds <b>7a-k</b> , <b>8a-o</b> and <b>9a-m</b> .....          | S26  |
| 7. Scaled-up version of the reaction of enantioselective addition of terminal alkynes to isatin-derived ketimines .....                                                                        | S43  |
| 8. General procedure for the synthesis of racemic 3-alkynyl-3-aminooxindoles .....                                                                                                             | S43  |
| 9 References.....                                                                                                                                                                              | S43  |
| 10. Copies of <sup>1</sup> H-NMR and <sup>13</sup> C-NMR spectra.....                                                                                                                          | S44  |
| 11. HPLC data.....                                                                                                                                                                             | S159 |
| 12. X-Ray structure and crystal data of <b>2e</b> and <b>8c</b> .....                                                                                                                          | S232 |

## 1. General experimental procedures

All reactions were carried out in anhydrous solvents under nitrogen atmosphere in dried glassware by means of Schlenk techniques.  $^1\text{H}$  NMR (400 or 500 MHz) and  $^{13}\text{C}$  NMR (100 or 126 MHz) spectra were recorded in  $\text{CDCl}_3$  or  $\text{DMSO-d}_6$ . Chemical shifts for protons are reported in ppm from tetramethylsilane with the residual  $\text{CHCl}_3$  or  $\text{DMSO-d}_6$  resonance as internal reference. Chemical shifts for carbons are reported in ppm from tetramethylsilane and are referenced to the carbon resonance of the solvent. Data are reported as follows: chemical shift, multiplicity (s = singlet, d = doublet, t = triplet, q = quartet, m = multiplet, br = broad), coupling constants in Hertz, and integration. Specific rotations were measured using a 5 mL cell with a 1 dm path length, and a sodium lamp, and concentration is given in g per 100 mL High resolution mass spectrometry analysis (HRMS) was performed by a quadrupole spectrometer with TOF analyzer Flash chromatography was carried out using silica gel (230–240 mesh). TLC analysis was performed on glass-backed plates coated with silica gel 60 and an F254 indicator and visualized by either UV irradiation or by staining with  $\text{I}_2$  or phosphomolybdic acid solution. Chemical yields refer to pure isolated substances. Chiral HPLC analysis was performed using a Phenomenex Lux Cellulose-1, Phenomenex Lux Cellulose-2, Phenomenex Lux i-Amylose-1, Phenomenex Lux i-Amylose-2, Phenomenex Lux i-Amylose-3, Chiralpak AD-H or Chiralpak AS-H columns. UV detection was monitored at 210, 220 or 254 nm. Dimethylzinc (1.2 M solution in toluene) was purchased from Acros Organics.

## 2. Synthesis and Characterization Data of N-substituted Isatins.

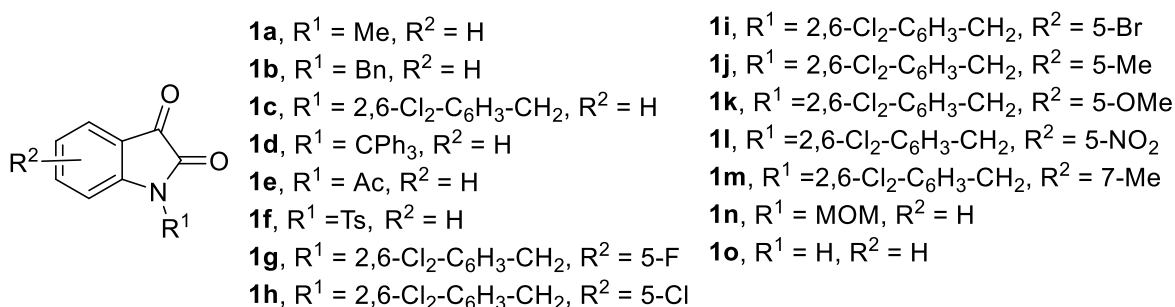

Isatins **1a**,<sup>1</sup> **1b**,<sup>2</sup> **1c**,<sup>3</sup> **1d**,<sup>4</sup> **1e**,<sup>5</sup> **1f**,<sup>6</sup> and **1n**<sup>7</sup> were synthesized following described procedures and characterization data were in concordance to those reported in the literature.

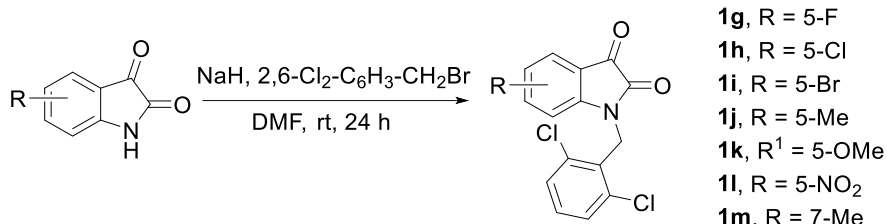

To a suspension of NaH (60% in mineral oil, 5.1 mmol, 204 mg) in anhydrous DMF (10 mL) at 0°C was added the N-unprotected isatin (3.4 mmol) and the mixture was stirred at 0°C for 15 min. Then, 2,6-dichlorobenzyl bromide (1.2 mmol, 1.32 g) was added and the reaction was stirred at rt for 24 h. Ice water was added to the mixture until precipitation of the N-protected isatin. The precipitate was filtrated and washed with water and the solid was recrystallized from ethyl acetate to afford the pure product.

**5-Fluoro-1-(2,6-dichlorobenzyl)indoline-2,3-dione (1g).** This compound was obtained from the

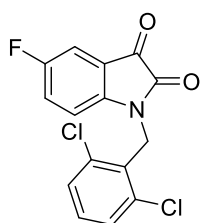

N-unprotected isatin (3.4 mmol, 560 mg). Red solid, yield: 951 mg, 82%; m.p. 170-171 °C; <sup>1</sup>H NMR (500 MHz, CDCl<sub>3</sub>) δ 5.24 (s, 2H), 6.69 (dd, *J* = 8.7, 3.6 Hz, 1H), 7.16 (m, 1H), 7.26 (m, 1H), 7.30 (dd, *J* = 6.5, 2.7 Hz, 1H), 7.38 (d, *J* = 8.1 Hz, 2H); <sup>13</sup>C NMR (126 MHz, CDCl<sub>3</sub>) δ 40.2, 112.3 (d, *J* = 7.1 Hz), 112.4 (d, *J* = 24.3 Hz), 118.6 (d, *J* = 7.1 Hz), 124.7 (d, *J* = 24.1 Hz), 128.8, 129.2, 130.4,

136.3, 146.5 (d, *J* = 2.1 Hz), 157.6, 159.2 (d, *J* = 246 Hz), 182.3; <sup>19</sup>F NMR (470 MHz, CDCl<sub>3</sub>) δ -118.1. IR (neat) ν 1730, 1616, 1482, 1432, 764 cm<sup>-1</sup>; HRMS (ESI-TOF) calcd for C<sub>15</sub>H<sub>9</sub>Cl<sub>2</sub>FNO<sub>2</sub> [M+H]<sup>+</sup> 323.9989, found 323.9999.

**5-Chloro-1-(2,6-dichlorobenzyl)indoline-2,3-dione (1h).** This compound was obtained from the

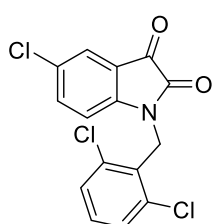

N-unprotected isatin (4.0 mmol, 725 mg). Orange solid, yield: 612 mg, 45%; m.p. 225-227 °C; <sup>1</sup>H NMR (500 MHz, CDCl<sub>3</sub>) δ 5.24 (s, 2H), 6.69 (d, *J* = 8.5 Hz, 1H), 7.26 (t, *J* = 8.0 Hz, 1H), 7.38 (d, *J* = 8.1 Hz, 2H), 7.40 (dd, *J* = 8.5, 2.3 Hz, 1H), 7.56 (d, *J* = 2.2 Hz, 1H); <sup>13</sup>C NMR (126 MHz, CDCl<sub>3</sub>) δ 40.28, 112.4, 118.7, 125.2, 128.7, 129.1, 129.5, 130.4, 136.2, 137.6, 148.6, 157.7, 181.8; IR (neat)

ν 1733, 1613, 1428, 1324, 778, 721 cm<sup>-1</sup>; HRMS (ESI-TOF): calcd for C<sub>15</sub>H<sub>9</sub>Cl<sub>3</sub>NO<sub>2</sub> [M+H]<sup>+</sup> 339.9693, found 339.9702.

**5-Bromo-1-(2,6-dichlorobenzyl)indoline-2,3-dione (1i).** This compound was obtained from the

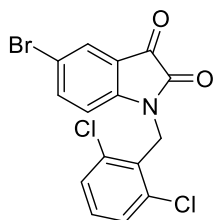

N-unprotected isatin (3.4 mmol, 768 mg). Orange solid, yield: 550 mg, 42%; m.p. 210-212 °C;  $^1\text{H}$  NMR (500 MHz, DMSO- $d_6$ )  $\delta$  5.11 (s, 2H), 6.94 (d,  $J$  = 8.5 Hz, 1H), 7.41 (m, 1H), 7.53 (d,  $J$  = 8.1 Hz, 2H), 7.74 (d,  $J$  = 2.1 Hz, 1H), 7.89 (dd,  $J$  = 8.5, 2.1 Hz, 1H);  $^{13}\text{C}$  NMR (126 MHz, DMSO- $d_6$ )  $\delta$  113.4, 115.6, 119.8, 127.4, 129.5, 130.0, 131.2, 135.8, 140.6, 150.0, 157.8, 181.9; IR (neat)  $\nu$  1733, 1599, 1425, 778  $\text{cm}^{-1}$ ; HRMS (ESI-TOF) calcd for  $\text{C}_{15}\text{H}_9\text{BrCl}_2\text{NO}_2$   $[\text{M}+\text{H}]^+$  383.9188, found 383.9195.

**1-(2,6-Dichlorobenzyl)-5-methylindoline-2,3-dione (1j).** This compound was obtained from the

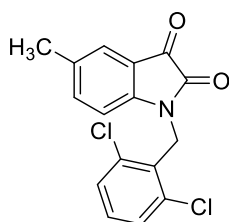

N-unprotected isatin (3.5 mmol, 565 mg). Red solid, yield: 763 mg, 68%; m.p. 179-182 °C;  $^1\text{H}$  NMR (500 MHz,  $\text{CDCl}_3$ )  $\delta$  2.27 (s, 3H), 5.21 (s, 2H), 6.61 (d,  $J$  = 8.1 Hz, 1H), 7.22-7.26 (m, 2H), 7.36 (d,  $J$  = 8.0 Hz, 2H), 7.40 (d,  $J$  = 1.6 Hz, 1H);  $^{13}\text{C}$  NMR (126 MHz,  $\text{CDCl}_3$ )  $\delta$  20.5, 40.1, 110.9, 117.9, 125.6, 129.0, 129.2, 130.1, 133.4, 136.3, 138.7, 148.2, 157.9, 183.1; IR (neat)  $\nu$  1737, 1623, 1495, 1435, 1328, 781  $\text{cm}^{-1}$ ; HRMS (ESI-TOF) calcd for  $\text{C}_{16}\text{H}_{12}\text{Cl}_2\text{NO}_2$   $[\text{M}+\text{H}]^+$  320.0240, found 320.0249.

**1-(2,6-Dichlorobenzyl)-5-methoxyindoline-2,3-dione (1k).** This compound was obtained from

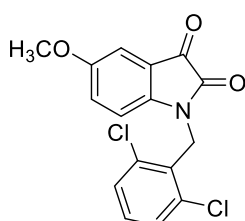

the N-unprotected isatin (3.4 mmol, 550 mg). Brown solid, yield: 580 mg, 53%; m.p. 154-156 °C;  $^1\text{H}$  NMR (500 MHz,  $\text{CDCl}_3$ )  $\delta$  3.75 (s, 3H), 5.20 (s, 2H), 6.63 (d,  $J$  = 8.7 Hz, 1H), 6.98 (dd,  $J$  = 8.7, 2.8 Hz, 1H), 7.12 (d,  $J$  = 2.8 Hz, 1H), 7.24 (m, 1H), 7.36 (d,  $J$  = 8.0 Hz, 2H);  $^{13}\text{C}$  NMR (126 MHz,  $\text{CDCl}_3$ )  $\delta$  40.1, 55.8, 109.5, 112.1, 118.3, 124.6, 129.1, 129.2, 130.2, 136.3, 144.3, 156.2, 157.9, 183.2; IR (neat)  $\nu$  1733, 1482, 1435, 1281, 1016, 791, 761  $\text{cm}^{-1}$ ; HRMS (ESI-TOF) calcd for  $\text{C}_{16}\text{H}_{12}\text{Cl}_2\text{NO}_3$   $[\text{M}+\text{H}]^+$  336.0189, found 336.0202.

**1-(2,6-Dichlorobenzyl)-5-nitroindoline-2,3-dione (1l).** This compound was obtained from the N-

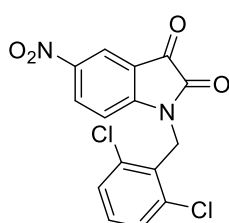

unprotected isatin (4.0 mmol, 765 mg). Yellow solid, yield: 615 mg, 44%; m.p. 215-216 °C;  $^1\text{H}$  NMR (500 MHz,  $\text{CDCl}_3$ )  $\delta$  5.33 (s, 2H), 6.89 (d,  $J$  = 8.8 Hz, 1H), 7.30 (m, 1H), 7.41 (d,  $J$  = 8.0 Hz, 2H), 8.39 (dd,  $J$  = 8.8, 2.4 Hz, 1H), 8.46 (d,  $J$  = 2.4 Hz, 1H);  $^{13}\text{C}$  NMR (126 MHz,  $\text{CDCl}_3$ )  $\delta$  40.6, 111.3, 117.9, 120.8, 128.1, 129.3, 130.8, 133.5, 136.2, 144.0, 154.4, 157.3, 180.7; IR (neat)  $\nu$  1753, 1613, 1334, 1314, 1271, 795  $\text{cm}^{-1}$ ; HRMS (ESI-TOF) calcd for  $\text{C}_{15}\text{H}_9\text{Cl}_2\text{N}_2\text{O}_4$   $[\text{M}+\text{H}]^+$  350.9934, found 350.9935.



**1-(2,6-Dichlorobenzyl)-7-methylindoline-2,3-dione (1m).** This compound was obtained from

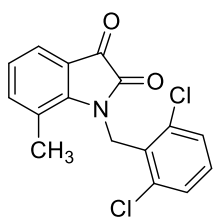

the N-protected isatin (6.8 mmol, 1.10 g). Red-orange solid, yield: 1.42 g, 65%; m.p. 209-211 °C;  $^1\text{H}$  NMR (500 MHz,  $\text{CDCl}_3$ )  $\delta$  2.39 (s, 3H), 5.42 (s, 2H), 7.01 (t,  $J = 7.5$  Hz, 1H), 7.18 (t,  $J = 8.0$  Hz, 1H), 7.29-7.31 (m, 3H), 7.50 (d,  $J = 7.2$  Hz, 1H);  $^{13}\text{C}$  NMR (126 MHz,  $\text{CDCl}_3$ )  $\delta$  19.1, 43.2, 119.1, 121.8, 123.6, 123.8, 129.1, 129.4, 130.7, 135.4, 142.4, 149.2, 159.5, 183.1; IR (neat)  $\nu$  1727, 1593, 1435, 1321, 1244, 1043, 788, 771  $\text{cm}^{-1}$ ; HRMS (ESI-TOF) calcd for  $\text{C}_{16}\text{H}_{12}\text{Cl}_2\text{NO}_2$   $[\text{M}+\text{H}]^+$  320.0240, found 320.0249.

### 3. General Procedure for the Catalytic Enantioselective Alkynylation of Isatins 1a-m and Characterization Data of Compounds 2a-f, 3a-p, 4a-k and 5a-b.

To a solution 1.2 M of  $\text{ZnMe}_2$  in toluene (0.33 mL, 0.4 mmol) under nitrogen atmosphere was added the corresponding alkyne (0.4 mmol) and the mixture was stirred for 35 min at room temperature. Then, a solution 0.1 M of ligand **L2** in toluene (0.2 mL, 0.02 mmol) was added and the mixture was stirred at room temperature for 25 min whereupon the mixture was cooled to -20 °C. A solution of the isatin **1a-m** (0.1 mmol) in anhydrous  $\text{CH}_2\text{Cl}_2$  (1.5 mL) was finally added dropwise. After stirring at -20 °C for 22 h, the reaction mixture was quenched with saturated aqueous solution of  $\text{NH}_4\text{Cl}$ , diluted with  $\text{CH}_2\text{Cl}_2$  and directly dried over  $\text{MgSO}_4$ , filtered and concentrated under reduced pressure. The residue was purified by silica gel column chromatography using mixtures of ethyl acetate-hexanes as eluent.

**(R)-3-hydroxy-1-methyl-3-(phenylethynyl)indolin-2-one (2a).** This compound was obtained

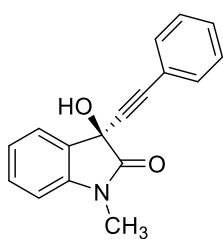

from the isatin **1a** (0.12 mmol, 20 mg). White solid, yield: 24 mg, 72%; m.p. 141-143 °C;  $[\alpha]_D^{25} = -6.6$  ( $c$  0.3,  $\text{CH}_2\text{Cl}_2$ , 88% ee);  $^1\text{H}$ -NMR (500 MHz,  $\text{CDCl}_3$ )  $\delta$  3.25 (s, 3H), 3.53 (s, 1H), 6.87 (d,  $J = 7.9$  Hz, 1H), 7.17 (td,  $J_1 = 7.6$  Hz,  $J_2 = 1.0$  Hz, 1H), 7.26-7.33 (m, 3H), 7.39 (td,  $J = 7.8$  Hz,  $J = 1.3$  Hz, 1H), 7.43-7.45 (m, 2H), 7.61 (ddd,  $J_1 = 7.4$  Hz,  $J_2 = 1.3$  Hz,  $J_3 = 0.6$  Hz, 1H).;  $^{13}\text{C}$ -NMR (126 MHz,  $\text{CDCl}_3$ )  $\delta$  26.6, 69.5, 85.5, 86.3, 108.9, 121.6, 123.8, 124.7, 128.2, 128.9, 129.0, 130.5, 132.1, 143.1, 173.9; IR (neat)  $\nu$  3347, 2925, 2224, 1698, 1092, 756, 691  $\text{cm}^{-1}$ ; HRMS (ESI-TOF) calcd for  $\text{C}_{17}\text{H}_{13}\text{NO}_2$   $[\text{M}+\text{H}]^+$  264.1019, found 264.1025; HPLC (Chiralpak AS-H, hexane:isopropanol = 95:5, 1 mL  $\text{min}^{-1}$ ,  $\lambda = 254$  nm):  $t_R$  (major) = 23.1 min,  $t_R$  (minor) = 29.5 min.

**(R)-1-benzyl-3-hydroxy-3-(phenylethynyl)indolin-2-one (2b).** This compound was obtained

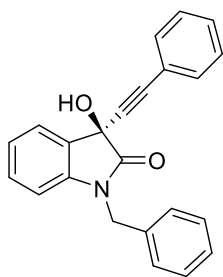

from the isatin **1b** (0.10 mmol, 24 mg). White solid, yield: 23 mg, 68%; m.p. 131-133 °C;  $[\alpha]_D^{25} = -9.1$  (c 0.3, CH<sub>2</sub>Cl<sub>2</sub>, 66% ee); <sup>1</sup>H-NMR (500 MHz, CDCl<sub>3</sub>) δ 3.69 (s, 1H), 4.93 (s, 2H), 6.73 (d, *J* = 7.8 Hz, 1H), 7.12 (td, *J* = 7.5 Hz, 1.0 Hz, 1H), 7.23-7.375 (m, 9H), 7.45-7.47 (m, 2H), 7.62 (d, *J* = 7.4 Hz, 1H); <sup>13</sup>C-NMR (126 MHz, CDCl<sub>3</sub>) δ 44.1, 69.6, 85.4, 86.6, 109.9, 123.8, 124.8, 127.2, 127.8, 128.2, 128.9, 129.0, 130.4, 132.1, 135.0, 142.2, 174.1; IR (neat) ν 3310, 2925, 2218, 1709, 1171, 749, 691 cm<sup>-1</sup>. HRMS (ESI-TOF) calcd for C<sub>23</sub>H<sub>7</sub>NO<sub>2</sub> [M+H]<sup>+</sup> 340.1332, found 340.1344; HPLC (Chiralpak AD-H, hexane:isopropanol = 70:30, 1 mL min<sup>-1</sup>, λ = 254 nm): *t*<sub>R</sub> (major) = 10.9 min, *t*<sub>R</sub> (minor) = 15.2 min.

**(R)-1-(2,6-dichlorobenzyl)-3-hydroxy-3-(phenylethynyl)indolin-2-one**

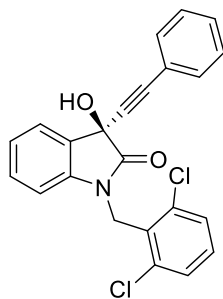

**(2c).** This compound was obtained from the isatin **1c** (0.10 mmol, 31 mg). White solid, yield: 32 mg, 78%; m.p. 162-164 °C;  $[\alpha]_D^{25} = -107.4$  (c 0.4, CH<sub>2</sub>Cl<sub>2</sub>, 92% ee). <sup>1</sup>H-NMR (500 MHz, CDCl<sub>3</sub>) δ 3.40 (s, 1H), 5.18 (d, 1H, *J* = 15.2 Hz), 5.33 (d, *J* = 15.3 Hz, 1H), 6.69 (d, *J* = 7.9 Hz, 1H), 7.08 (td, *J* = 7.6, 1.0 Hz, 1H), 7.18-7.23 (m, 2H), 7.27-7.32 (m, 3H), 7.35 (d, *J* = 8.2 Hz, 2H), 7.42-7.44 (m, 2H), 7.58 (ddd, *J* = 7.5 Hz, *J* = 1.3 Hz, *J* = 0.6 Hz, 1H); <sup>13</sup>C-NMR

(100 MHz, CDCl<sub>3</sub>) δ 40.4, 69.4, 85.6, 86.4, 109.9, 121.7, 123.6, 124.7, 128.2, 128.8, 128.9, 129.0, 129.8, 130.0, 130.4, 132.0, 136.4, 141.8, 173.3; IR (neat) ν 3383, 2925, 2218, 1716, 1489, 1168, 976, 749 cm<sup>-1</sup>; HRMS (ESI-TOF) calcd for C<sub>23</sub>H<sub>15</sub>Cl<sub>2</sub>NO<sub>2</sub> [M+H]<sup>+</sup>: 408.0553, found: 408.0564. HPLC (Chiralpak AD-H, hexane:isopropanol = 70:30, 1 mL min<sup>-1</sup>, λ = 254 nm): *t*<sub>R</sub> (major) = 12.1 min, *t*<sub>R</sub> (minor) = 15.1 min

**(R)-3-hydroxy-3-(phenylethynyl)-1-tritylindolin-2-one (2d).** This compound was obtained from

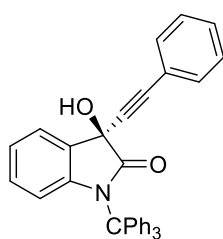

the isatin **1d** (0.10 mmol, 40 mg). White solid, yield: 34 mg, 67%; m.p. 92-94 °C;  $[\alpha]_D^{25} = +12.9$  (c 0.3, CH<sub>2</sub>Cl<sub>2</sub>, 84% ee); <sup>1</sup>H-NMR (500 MHz, CDCl<sub>3</sub>) δ 3.37 (s, 1H), 6.29 (d, *J* = 8.1 Hz, 1H), 6.95 (t, *J* = 7.9 Hz, 1H), 7.01 (t, *J* = 7.5 Hz, 1H), 7.20-7.36 (m, 12H), 7.47-7.50 (m, 8H), 7.55 (d, *J* = 7.5 Hz, 1H); <sup>13</sup>C-NMR (100 MHz, CDCl<sub>3</sub>) δ 69.7, 74.3, 85.9, 86.2, 116.2, 121.8, 123.1, 123.9,

127.1, 127.8, 128.3, 128.8, 128.9, 129.0, 129.2, 132.1, 141.6, 142.7, 175.6; IR (neat) ν 3387, 2925, 2221, 1723, 1468, 742, 699 cm<sup>-1</sup>; HRMS (ESI-TOF) calcd for C<sub>35</sub>H<sub>25</sub>NO<sub>2</sub> [M+H]<sup>+</sup>: 492.1958, found: 492.1964. HPLC (Chiralpak AD-H, hexane:isopropanol = 70:30, 1 mL min<sup>-1</sup>, λ = 254 nm): *t*<sub>R</sub> (major) = 5.4 min, *t*<sub>R</sub> (minor) = 17.1 min.

**(R)-1-acetyl-3-hydroxy-3-(phenylethynyl)indolin-2-one (2e).** This compound was obtained

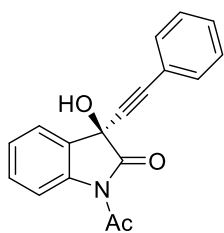

from the isatin **1e** (0.11 mmol, 21 mg). White solid, yield: 22 mg, 68%; m.p. 104-106 °C;  $[\alpha]_D^{25} = +5.1$  (c 0.4, CH<sub>2</sub>Cl<sub>2</sub>, 86% ee); <sup>1</sup>H-NMR (500 MHz, CDCl<sub>3</sub>) δ 2.72 (s, 3H), 3.47 (s, 1H), 7.28-7.37 (m, 4H), 7.42-7.45 (m, 3H), 7.66 (d, *J* = 7.5 Hz, 1H), 8.26 (d, *J* = 8.3 Hz, 1H); <sup>13</sup>C-NMR (126 MHz, CDCl<sub>3</sub>) δ 26.5, 69.7, 84.7, 87.9, 117.1, 121.0, 124.6, 126.2, 127.8, 128.3, 129.4, 130.9, 132.0,

139.6, 170.5, 174.3; IR (neat) ν 3401, 2932, 2232, 1756, 1716, 1261, 753 cm<sup>-1</sup>; HRMS (MALDI-TOF) calcd for C<sub>18</sub>H<sub>13</sub>NO<sub>3</sub> [M+Na]<sup>+</sup> 314.0788, found: 314.0802; HPLC (Chiralpak AS-H, hexane:isopropanol = 90:10, 1 mL min<sup>-1</sup>, λ = 254 nm): *t*<sub>R</sub> (major) = 10.2 min, *t*<sub>R</sub> (minor) = 13.1 min.

**(R)-3-hydroxy-3-(phenylethynyl)-1-tosylindolin-2-one (2f).** This compound was obtained from

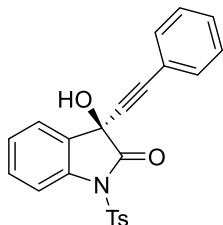

the isatin **1e** (0.12 mmol, 35 mg). Colorless oil, yield: 24 mg, 52%.  $[\alpha]_D^{25} = +35.0$  (c 0.2, CH<sub>2</sub>Cl<sub>2</sub>, 66% ee); <sup>1</sup>H-NMR (500 MHz, CDCl<sub>3</sub>) δ 2.40 (s, 3H), 3.38 (s, 1H), 7.26-7.39 (m, 8H), 7.44 (td, *J* = 7.9 Hz, *J* = 1.5 Hz, 1H), 7.59 (dd, *J*<sub>1</sub> = 7.5, *J*<sub>2</sub> = 1.4 Hz, 1H), 7.92 (d, *J* = 8.4 Hz, 1H), 7.98 (d, *J* = 8.4 Hz, 2H); <sup>13</sup>C-NMR (126 MHz, CDCl<sub>3</sub>) δ 21.7, 69.4, 84.0, 87.9, 114.1, 125.1,

125.8, 127.7, 127.9, 128.3, 129.4, 129.9, 131.1, 132.0, 134.5, 138.5, 146.0, 171.9; IR (neat) ν 3462, 2921, 2225, 1770, 1081, 756, 565 cm<sup>-1</sup>; HRMS (ESI-TOF) calcd for C<sub>23</sub>H<sub>17</sub>NO<sub>4</sub>S [M+H]<sup>+</sup> 404.0951, found: 404.0957; HPLC (Chiralpak AD-H, hexane:isopropanol = 70:30, 1 mL min<sup>-1</sup>, λ = 254 nm): *t*<sub>R</sub> (major) = 12.2 min, *t*<sub>R</sub> (minor) = 22.2 min

**(R)-1-(2,6-dichlorobenzyl)-3-hydroxy-3-((4-methoxyphenyl)ethynyl)indolin-2-one (3a).** This

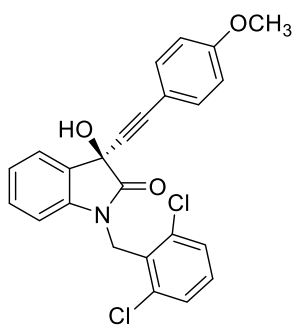

compound was obtained from the isatin **1c** (0.11 mmol, 33 mg). White solid, yield: 32 mg, 67%; mg; m.p. 174-176 °C;  $[\alpha]_D^{25} = -66.2$  (c 0.2, CH<sub>2</sub>Cl<sub>2</sub>, 98% ee); <sup>1</sup>H-NMR (400 MHz, CDCl<sub>3</sub>): δ 3.52 (s, 1H), 3.79 (s, 3H), 5.17 (d, *J* = 15.3 Hz, 1H), 5.33 (d, *J* = 15.3 Hz, 1H), 6.68 (d, *J* = 7.9 Hz, 1H), 6.80 (d, *J* = 8.6 Hz, 2H), 7.07 (t, *J* = 7.5 Hz, 1H), 7.17-7.22 (m, 2H), 7.33-7.38 (m, 4H), 7.58 (d, *J* = 7.3 Hz, 1H); <sup>13</sup>C-NMR (100 MHz, CDCl<sub>3</sub>) δ 40.4, 55.2, 69.4, 84.4, 86.5, 109.9, 113.7, 113.9, 123.5,

124.7, 129.0, 129.8, 129.9, 130.3, 133.6, 136.4, 141.8, 160.1, 173.4; IR (neat) ν 3329, 2925, 2225, 1712, 1250, 976, 749 cm<sup>-1</sup>; HRMS (ESI-TOF) calcd for C<sub>24</sub>H<sub>17</sub>Cl<sub>2</sub>NO<sub>3</sub> [M+H]<sup>+</sup>: 438.0658, found: 438.0670; HPLC (Chiralpak AD-H, hexane:isopropanol = 70:30, 1 mL min<sup>-1</sup>, λ = 254 nm): *t*<sub>R</sub> (major) = 13.5 min, *t*<sub>R</sub> (minor) = 19.1 min.

**(R)-1-(2,6-dichlorobenzyl)-3-hydroxy-3-(p-tolyethynyl)indolin-2-one (3b).** This compound was

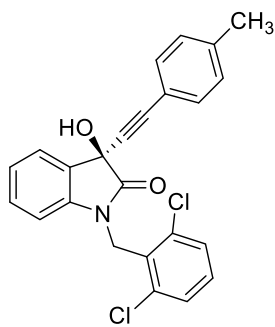

obtained from the isatin **1c** (0.11 mmol, 35 mg). White solid, yield: 32 mg, 67%; m.p. 121-123 °C;  $[\alpha]_D^{25} = -101.1$  (c 0.4, CH<sub>2</sub>Cl<sub>2</sub>, 96% ee); <sup>1</sup>H-NMR (500 MHz, CDCl<sub>3</sub>) δ 2.33 (s, 6H), 3.49 (s, 1H), 5.17 (d, *J* = 15.3 Hz, 1H), 5.33 (d, *J* = 15.3 Hz, 1H), 6.68 (d, *J* = 7.8 Hz, 1H z), 7.06-7.09 (m, 3H), 7.17-7.21 (m, 2H), 7.33 (t, *J* = 8.2 Hz, 4H), 7.58 (d, *J* = 7.5 Hz, 1H); <sup>13</sup>C-NMR (100 MHz, CDCl<sub>3</sub>) δ 21.5, 40.4, 69.4, 85.0, 86.7, 109.8, 118.6, 123.5, 124.7, 129.0, 129.8, 129.9, 130.3, 131.9, 136.4, 139.1,

141.8, 173.4; IR (neat) ν 3350, 2924, 225, 1716, 976, 811, 749, 525 cm<sup>-1</sup>; HRMS (ESI-TOF) calcd for C<sub>24</sub>H<sub>17</sub>Cl<sub>2</sub>NO<sub>2</sub> [M+H]<sup>+</sup> 422.0709, found 422.0723; HPLC (Chiralpak AD-H, hexane:isopropanol = 70:30, 1 mL min<sup>-1</sup>, λ = 254 nm): *t*<sub>R</sub> (major) = 12.3 min, *t*<sub>R</sub> (minor) = 18.1 min

**(R)-3-((4-bromophenyl)ethynyl)-1-(2,6-dichlorobenzyl)-3-hydroxyindolin-2-one (3c).** This

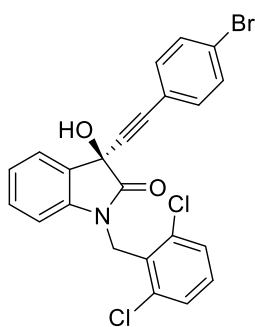

compound was obtained from the isatin **1c** (0.11 mmol, 35 mg). White solid, yield: 41 mg, 74%;  $[\alpha]_D^{25} = -97.2$  (c 0.3, CH<sub>2</sub>Cl<sub>2</sub>, 96% ee); <sup>1</sup>H-NMR (500 MHz, CDCl<sub>3</sub>) δ 3.71 (s, 1H), 5.16 (d, *J* = 15.3 Hz, 1H), 5.32 (d, *J* = 15.2 Hz, 1H), 6.69 (d, *J* = 7.9 Hz, 1H), 7.08 (tt, *J*<sub>1</sub> = 7.6, *J*<sub>2</sub> = 0.9 Hz, 1H), 7.18-7.22 (m, 2H), 7.25-7.28 (m, 2H), 7.34 (d, *J* = 8.1 Hz, 2H), 7.40 (d, *J* = 8.7 Hz, 2H), 7.57 (dd, *J*<sub>1</sub> = 7.4 Hz, *J*<sub>2</sub> = 1.3 Hz, 1H); <sup>13</sup>C-NMR (126 MHz, CDCl<sub>3</sub>): δ 40.4, 69.4, 85.3, 86.8, 110.0, 120.6, 123.4, 123.6, 124.7, 128.6, 129.0,

129.7, 130.5, 131.5, 133.4, 136.4, 141.8, 173.2K IR (neat) ν 3322, 2221, 1709, 976, 749 cm<sup>-1</sup>; HRMS (ESI-TOF) calcd for C<sub>23</sub>H<sub>14</sub>BrCl<sub>2</sub>NO<sub>2</sub> [M+H]<sup>+</sup> 485.9658, found 485.9657; HPLC (Chiralpak AD-H, hexane:isopropanol = 70:30, 1 mL min<sup>-1</sup>, λ = 254 nm): *t*<sub>R</sub> (major) = 11.5 min, *t*<sub>R</sub> (minor) = 23.2 min

**(R)-1-(2,6-dichlorobenzyl)-3-hydroxy-3-((4-(trifluoromethyl)phenyl)ethynyl)indolin-2-one**

**(3d).** This compound was obtained from the isatin **1c** (0.11 mmol, 33 mg). White solid, yield: 37

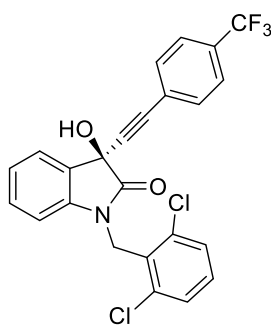

mg 73%; m.p. 156-158 °C;  $[\alpha]_D^{25} = -90.6$  (c 0.5, CH<sub>2</sub>Cl<sub>2</sub>, 92% ee); <sup>1</sup>H-NMR (400 MHz, CDCl<sub>3</sub>) δ 3.69 (s, 1H), 5.18 (d, *J* = 15.2 Hz, 1H), 5.34 (d, *J* = 15.5 Hz, 1H), 6.71 (d, *J* = 7.9 Hz, 1H), 7.10 (t, *J* = 7.6 Hz, 1H), 7.22 (t, *J* = 7.9 Hz, 2H), 7.35 (d, *J* = 8.1 Hz, 2H), 7.53 (s, 4H), 7.58 (d, *J* = 7.4 Hz, 1H); <sup>13</sup>C-NMR (100 MHz, CDCl<sub>3</sub>): δ 40.5, 69.3, 84.8, 88.1, 110.1, 123.7, 123.9 (q, *J* = 272.5 Hz), 124.7, 125.2 (q, *J* = 3.8 Hz), 125.5 (q, *J* = 1.5 Hz), 128.4, 129.1, 129.6, 130.0, 130.6, 130.7 (q, *J* = 32.8 Hz), 132.2, 136.4, 141.8,

173.1; <sup>19</sup>F NMR (376 MHz, CDCl<sub>3</sub>) δ -63.0; IR (neat) ν 3343, 2921, 1724, 1324, 1063, 838, 743 cm<sup>-1</sup>; HRMS (ESI-TOF) calcd for C<sub>24</sub>H<sub>14</sub>Cl<sub>2</sub>F<sub>3</sub>NO<sub>2</sub> [M+H]<sup>+</sup> 476.0426, found 476.0440; HPLC (Chiralpak

AD-H, hexane:isopropanol = 70:30, 1 mL min<sup>-1</sup>, λ = 254 nm): *t<sub>R</sub>* (major) = 8.6 min, *t<sub>R</sub>* (minor) = 19.1 min

**Methyl (*R*)-4-((1-(2,6-dichlorobenzyl)-3-hydroxy-2-oxoindolin-3-yl)ethynyl)benzoate (3e).** This

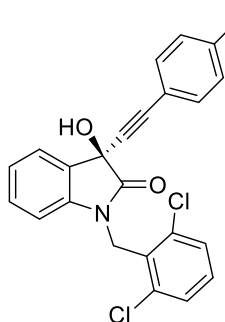

compound was obtained from the isatin **1c** (0.10 mmol, 32 mg). White solid, yield: 38 mg, 78%; m.p. 193-195 °C; [α]<sub>D</sub><sup>25</sup> = -106.5 (c 0.5, CH<sub>2</sub>Cl<sub>2</sub>, 94% ee); <sup>1</sup>H-NMR (400 MHz, CDCl<sub>3</sub>) δ 3.81 (s, 1H), 3.91 (s, 3H), 5.17 (d, *J* = 15.1 Hz, 1H), 5.34 (d, *J* = 15.3 Hz, 1H), 6.70 (d, *J* = 8.0 Hz, 1H), 7.09 (t, *J* = 7.6 Hz, 1H), 7.21 (t, *J* = 7.6 Hz, 2H), 7.35 (dd, *J*<sub>1</sub> = 8.0 Hz, *J*<sub>2</sub> = 1.7 Hz, 2H), 7.47 (dd, *J*<sub>1</sub> = 8.1 Hz, *J*<sub>2</sub> = 1.6 Hz, 2H), 7.58 (d, *J* = 7.4 Hz, 1H), 7.94 (dd, *J*<sub>1</sub> = 8.1 Hz, *J*<sub>2</sub> = 1.6 Hz, 2H);

<sup>13</sup>C-NMR (100 MHz, CDCl<sub>3</sub>) δ 40.5, 52.3, 69.4, 85.4, 88.5, 110.0, 123.6, 124.8, 126.3, 128.5, 129.1, 129.4, 129.7, 130.0, 130.1, 130.5, 131.9, 136.4, 141.8, 166.4 173.2; IR (neat) ν 3401, 3074, 2921, 1713, 1277, 1051, 769, 751 cm<sup>-1</sup>; L HRMS (ESI-TOF) calcd for C<sub>25</sub>H<sub>17</sub>Cl<sub>2</sub>NO<sub>4</sub> [M+H]<sup>+</sup> 466.0607, found 466.0615; HPLC (Phenomenex Lux-Cellulose-1, hexane:isopropanol = 70:30, 1 mL min<sup>-1</sup>, λ = 254 nm): *t<sub>R</sub>* (major) = 10.4 min, *t<sub>R</sub>* (minor) = 13.9 min.

**(*R*)-1-(2,6-dichlorobenzyl)-3-hydroxy-3-((3-methoxyphenyl)ethynyl)indolin-2-one (3f).** This

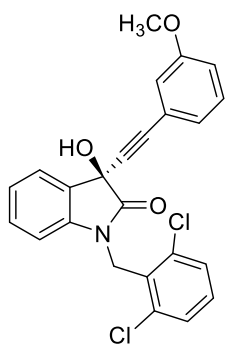

compound was obtained from the isatin **1c** (0.11 mmol, 35 mg). White solid, yield: 36 mg, 71%; m.p. 146-148 °C; [α]<sub>D</sub><sup>25</sup> = -74.0 (c 0.25, CH<sub>2</sub>Cl<sub>2</sub>, 92% ee); <sup>1</sup>H-NMR (500 MHz, CDCl<sub>3</sub>) δ 3.54 (s, 1H), 3.77 (s, 3H), 5.17 (d, *J* = 15.2 Hz, 1H), 5.33 (d, *J* = 15.3 Hz, 1H), 6.68 (d, *J* = 7.9 Hz, 1H), 6.87 (ddd, *J*<sub>1</sub> = 8.4 Hz, *J*<sub>2</sub> = 2.6 Hz, *J*<sub>3</sub> = 0.9 Hz, 1H), 6.95 (dd, *J*<sub>1</sub> = 2.7, *J*<sub>2</sub> = 1.4 Hz, 1H), 7.02 (dt, *J*<sub>1</sub> = 7.6 Hz, *J*<sub>2</sub> = 1.3 Hz, 1H), 7.08 (td, *J*<sub>1</sub> = 7.5 Hz, *J*<sub>2</sub> = 1.0 Hz, 1H), 7.17-7.22 (m, 3H), 7.34 (d, *J* = 8.0 Hz, 2H), 7.58 (dd, 1H, *J*<sub>1</sub> = 7.40 Hz, *J*<sub>2</sub> = 0.8 Hz); <sup>13</sup>C-

NMR (100 MHz, CDCl<sub>3</sub>) δ 40.4, 55.3, 69.4, 85.4, 86.3, 109.9, 115.8, 116.6, 122.6, 123.6, 124.7, 128.8, 129.0, 129.3, 129.7, 130.0, 130.4, 136.4, 141.8, 159.2, 173.3; IR (neat) ν 3361, 2946, 1709, 1171, 980, 763 cm<sup>-1</sup>; HRMS (ESI-TOF) calcd for C<sub>24</sub>H<sub>17</sub>Cl<sub>2</sub>NO<sub>3</sub> [M+H]<sup>+</sup>: 438.0658, found: 438.0653; HPLC (Chiralpak AD-H, hexane:isopropanol = 70:30, 1 mL min<sup>-1</sup>, λ = 254 nm): *t<sub>R</sub>* (major) = 11.8 min, *t<sub>R</sub>* (minor) = 14.9 min.

**(R)-1-(2,6-dichlorobenzyl)-3-hydroxy-3-(m-tolyethynyl)indolin-2-one (3g).** This compound was

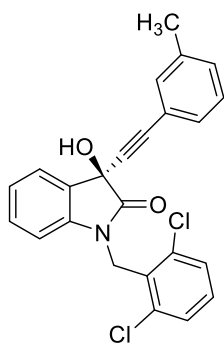

obtained from the isatin **1c** (0.11 mmol, 35 mg). White solid, yield: 37 mg, 77%; m.p. 99-101 °C;  $[\alpha]_D^{25} = -116.7$  (c 0.4, CH<sub>2</sub>Cl<sub>2</sub>, 98% ee); <sup>1</sup>H-NMR (500 MHz, CDCl<sub>3</sub>) δ 2.29 (s, 6H), 3.57 (s, 1H), 5.17 (d, *J* = 15.3 Hz, 1H), 5.33 (d, *J* = 15.3 Hz, 1H), 6.68 (d, *J* = 7.8 Hz, 1H), 7.08 (t, *J* = 7.6 Hz, 1H), 7.11-7.26 (m, 6H), 7.34 (d, *J* = 8.0 Hz, 2H), 7.58 (d, *J* = 7.4 Hz, 1H); <sup>13</sup>C-NMR (100 MHz, CDCl<sub>3</sub>) δ 21.1, 40.4, 69.4, 85.3, 86.6, 109.9, 121.5, 123.5, 124.7, 128.1, 128.9, 129.0, 129.1, 129.7, 129.8, 129.9, 130.4, 132.6, 136.4, 137.9, 141.8, 173.4; IR (neat) ν 3368, 2925, 2225, 1716, 1438, 980, 749, 688 cm<sup>-1</sup>; HRMS (ESI-TOF) calcd for C<sub>24</sub>H<sub>17</sub>Cl<sub>2</sub>NO<sub>2</sub> [M+H]<sup>+</sup> 422.0709, found 422.0717; HPLC (Chiralpak AD-H, hexane:isopropanol = 70:30, 1 mL min<sup>-1</sup>, λ = 254 nm): *t*<sub>R</sub> (major) = 19.3 min, *t*<sub>R</sub> (minor) = 22.9 min.

**(R)-3-((3-chlorophenyl)ethynyl)-1-(2,6-dichlorobenzyl)-3-hydroxyindolin-2-one (3h).** This

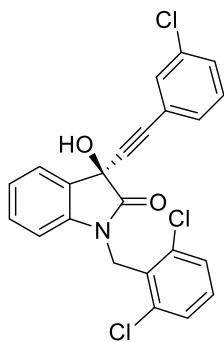

compound was obtained from the isatin **1c** (0.10 mmol, 32 mg). White solid, yield: 37 mg, 80%; m.p. 198-200 °C.;  $[\alpha]_D^{25} = -127.2$  (c 0.4, CH<sub>2</sub>Cl<sub>2</sub>, 98% ee); <sup>1</sup>H-NMR (400 MHz, CDCl<sub>3</sub>) δ 3.50 (s, 1H), 5.17 (d, *J* = 15.3 Hz, 1H), 5.33 (d, *J* = 15.3 Hz, 1H), 6.70 (dt, *J*<sub>1</sub> = 7.9 Hz, *J*<sub>2</sub> = 0.8 Hz, 1H), 7.09 (td, *J*<sub>1</sub> = 7.6 Hz, *J*<sub>2</sub> = 1.0 Hz, 1H), 7.19-7.24 (m, 3H), 7.28-7.33 (m, 2H), 7.35 (d, *J* = 8.1 Hz, 2H), 7.40-7.43 (m, 1H), 7.57 (ddd, *J*<sub>1</sub> = 7.4 Hz, *J*<sub>2</sub> = 1.4 Hz, *J*<sub>3</sub> = 0.6 Hz, 1H); <sup>13</sup>C-NMR (100 MHz, CDCl<sub>3</sub>) δ 40.5, 69.3, 84.9, 86.9, 110.0, 123.4, 123.6, 124.7, 128.5, 129.1, 129.3, 129.5, 129.7, 130.0, 130.1, 130.6, 131.8, 134.1, 136.4, 141.8, 173.1; IR (neat) ν 3333, 1939, 1709, 976, 753 cm<sup>-1</sup>; HRMS (ESI-TOF) calcd for C<sub>23</sub>H<sub>14</sub>Cl<sub>3</sub>NO<sub>2</sub> [M+H]<sup>+</sup> 442.0163, found 442.0175; HPLC (Chiralpak AD-H, hexane:isopropanol = 70:30, 1 mL min<sup>-1</sup>, λ = 254 nm): *t*<sub>R</sub> (major) = 9.6 min, *t*<sub>R</sub> (minor) = 12.0 min.

**(R)-1-(2,6-dichlorobenzyl)-3-((2-fluorophenyl)ethynyl)-3-hydroxyindolin-2-one (3i).** This

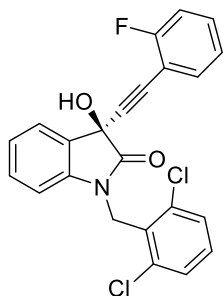

compound was obtained from the isatin **1c** (0.10 mmol, 30 mg). White solid, yield: 34 mg, 81%; m.p. 139-141 °C;  $[\alpha]_D^{25} = -97.8$  (c 0.3, CH<sub>2</sub>Cl<sub>2</sub>, 99% ee); <sup>1</sup>H-NMR (500 MHz, CDCl<sub>3</sub>) δ 3.69 (s, 1H), 5.17 (d, *J* = 15.3 Hz, 1H), 5.33 (d, *J* = 15.3 Hz, 1H), 6.68 (d, *J* = 7.9 Hz, 1H), 7.00-7.09 (m, 3H), 7.17-7.21 (m, 2H), 7.27-7.31 (m, 1H), 7.33 (d, *J* = 8.1 Hz, 2H), 7.41 (td, *J* = 7.3 Hz, *J* = 1.8 Hz, 1H), 7.59 (dd, *J*<sub>1</sub> = 7.5 Hz, *J*<sub>2</sub> = 1.3 Hz, 1H); <sup>13</sup>C-NMR (100 MHz, CDCl<sub>3</sub>) δ 40.4, 69.4, 79.9, 90.7, 109.9, 110.4 (d, *J* = 15.5 Hz), 115.5 (d, *J* = 20.6 Hz), 123.6, 123.8 (d, *J* = 3.7 Hz), 124.8, 128.5, 129.0, 129.7, 130.0, 130.5, 130.7 (d, *J* = 7.9 Hz), 133.8, 136.4, 141.8, 162.9 (d, *J* = 253.3 Hz), 173.1; <sup>19</sup>F NMR (470 MHz, CDCl<sub>3</sub>) δ -108.9; IR (neat) ν 3333, 2928, 1712, 976, 753 cm<sup>-1</sup>; HRMS (ESI-TOF) calcd for C<sub>23</sub>H<sub>14</sub>Cl<sub>2</sub>FNO<sub>2</sub> [M+H]<sup>+</sup> 426.0458, found 426.0466; HPLC (Chiralpak

AD-H, hexane:isopropanol = 80:20, 1 mL min<sup>-1</sup>, λ = 254 nm): t<sub>R</sub> (major) = 17.1 min, t<sub>R</sub> (minor) = 20.4 min.

**(R)-1-(2,6-dichlorobenzyl)-3-hydroxy-3-((2-(trifluoromethyl)phenyl)ethynyl)indolin-2-one (3j).**

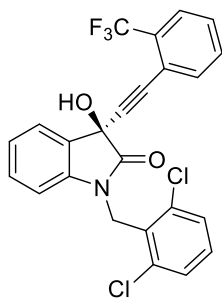

This compound was obtained from the isatin **1c** (0.12 mmol, 36 mg). White solid, yield: 41 mg, 74%; m.p. 151-153 °C; [α]<sub>D</sub><sup>25</sup> = -86.7 (c 0.5, CH<sub>2</sub>Cl<sub>2</sub>, 98% ee); <sup>1</sup>H-NMR (500 MHz, CDCl<sub>3</sub>) δ 3.78 (s, 1H), 5.16 (d, *J* = 15.3 Hz, 1H), 5.31 (d, *J* = 15.3 Hz, 1H), 6.68 (d, *J* = 7.9 Hz, 1H), 7.08 (t, *J* = 7.6 Hz, 1H), 7.19 (t, *J* = 7.6 Hz, 2H), 7.33 (dd, *J*<sub>1</sub> = 8.1 Hz, *J*<sub>2</sub> = 1.8 Hz, 2H), 7.38-7.46 (m, 2H), 7.57-7.62 (m, 3H); <sup>13</sup>C-NMR (100 MHz, CDCl<sub>3</sub>) δ 40.5, 69.3, 82.2, 91.0, 109.9, 119.9 (q, *J* = 2.2 Hz), 123.2 (q, *J* = 273.6 Hz), 123.6, 124.9, 125.8 (q, *J* = 5.0 Hz), 128.3, 128.7, 129.0, 129.7, 129.9, 130.5, 131.3, 132.0 (q, *J* = 30.3 Hz), 134.34, 136.4, 141.8, 172.9; <sup>19</sup>F NMR (470 MHz, CDCl<sub>3</sub>) δ -62.1; IR (neat) ν 3368, 1712, 1168, 1128, 763, 749 cm<sup>-1</sup>; HRMS (ESI-TOF) calcd for C<sub>24</sub>H<sub>14</sub>Cl<sub>2</sub>F<sub>3</sub>NO<sub>2</sub> [M+H]<sup>+</sup> 476.0426, found 476.0415; HPLC (Chiralpak AD-H, hexane:isopropanol = 80:20, 1 mL min<sup>-1</sup>, λ = 254 nm): t<sub>R</sub> (major) = 14.9 min, t<sub>R</sub> (minor) = 20.4 min.

**(R)-1-(2,6-dichlorobenzyl)-3-(3,3-dimethylbut-1-yn-1-yl)-3-hydroxyindolin-2-one (3k).** This

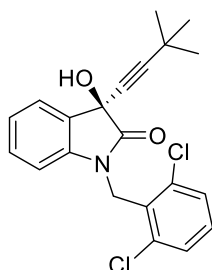

compound was obtained from the isatin **1c** (0.11 mmol, 33 mg). White oil, yield: 16 mg, 38%; [α]<sub>D</sub><sup>25</sup> = -88.1 (c 0.3, CH<sub>2</sub>Cl<sub>2</sub>, 84% ee); <sup>1</sup>H-NMR (400 MHz, CDCl<sub>3</sub>) δ 1.20 (s, 9H), 3.27 (s, 1H), 5.12 (d, *J* = 15.2 Hz, 1H), 5.31 (d, *J* = 15.2 Hz, 1H), 6.64 (d, *J* = 7.9 Hz, 1H), 7.04 (t, *J* = 7.5 Hz, 1H), 7.18 (dt, *J*<sub>1</sub> = 15.5 Hz, *J*<sub>3</sub> = 8.1 Hz, 2H), 7.33 (d, *J* = 8.1 Hz, 2H), 7.48 (d, *J* = 7.5 Hz, 1H); <sup>13</sup>C-NMR (100 MHz, CDCl<sub>3</sub>) δ 27.5, 30.6, 40.3, 68.9, 75.6, 95.8, 109.7, 123.4, 129.0, 129.4, 129.9, 130.0, 136.4, 141.7, 173.7; IR (neat) ν 3382, 2921, 1716, 988, 773, 747 cm<sup>-1</sup>; HRMS (ESI-TOF) calcd for C<sub>21</sub>H<sub>19</sub>Cl<sub>2</sub>NO<sub>2</sub> [M+H]<sup>+</sup> 388.0866, found 388.0880; HPLC (Phenomenex Lux-Cellulose-1, hexane:isopropanol = 90:10, 1 mL min<sup>-1</sup>, λ = 254 nm): t<sub>R</sub> (major) = 9.0 min, t<sub>R</sub> (minor) = 11.5 min.

**(R)-1-(2,6-dichlorobenzyl)-3-hydroxy-3-(oct-1-yn-1-yl)indolin-2-one (3l).** This compound was

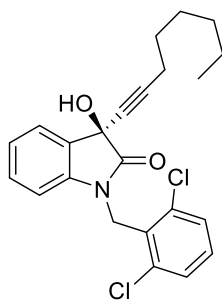

obtained from the isatin **1c** (0.11 mmol, 35 mg). Colorless oil, yield: 30 mg, 64%; [α]<sub>D</sub><sup>25</sup> = -60.9 (c 0.3, CH<sub>2</sub>Cl<sub>2</sub>, 62% ee); <sup>1</sup>H-NMR (500 MHz, CDCl<sub>3</sub>) δ 0.86 (t, *J* = 7.0 Hz, 3H), 1.21-1.36 (m, 6H), 1.48 (quint, *J* = 7.0 Hz, 2H), 2.20 (t, *J* = 7.1 Hz, 2H), 3.31 (s, 1H), 5.14 (d, *J* = 14.7 Hz, 1H), 5.29 (d, *J* = 15.8 Hz, 1H), 6.64 (d, *J* = 7.9 Hz, 1H), 7.04 (t, *J* = 7.6 Hz, 1H), 7.14-7.21 (m, 2H), 7.33 (d, *J* = 8.5 Hz, 2H), 7.49 (d, *J* = 7.4 Hz, 1H); <sup>13</sup>C-NMR (126 MHz, CDCl<sub>3</sub>) δ 14.0,

18.9, 22.5, 28.1, 28.5, 31.2, 67.0, 77.0, 88.1, 109.8, 123.4, 124.5, 129.0, 129.3, 129.8, 129.9, 130.1, 141.7, 173.6; IR (neat)  $\nu$  3383, 2928, 2236, 1716, 1467, 749  $\text{cm}^{-1}$ ; HRMS (ESI-TOF) calcd for  $\text{C}_{23}\text{H}_{23}\text{Cl}_2\text{NO}_2$   $[\text{M}+\text{H}]^+$  416.1179, found: 416.1191; HPLC (Chiralpak AD-H, hexane:isopropanol = 80:20, 1  $\text{mL min}^{-1}$ ,  $\lambda$  = 254 nm):  $t_R$  (major) = 9.4,  $t_R$  (minor) = 12.0 min.

**(R)-1-(2,6-dichlorobenzyl)-3-hydroxy-3-(4-phenylbut-1-yn-1-yl)indolin-2-one (3m).** This

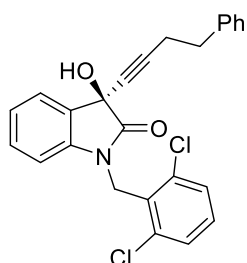

compound was obtained from the isatin **1c** (0.11 mmol, 35 mg). Colorless oil, yield: 33 mg, 66%;  $[\alpha]_D^{25}$  = -30.0 (c 0.2,  $\text{CH}_2\text{Cl}_2$ , 64% ee).  $^1\text{H-NMR}$  (500 MHz,  $\text{CDCl}_3$ )  $\delta$  2.50 (t,  $J$  = 7.5 Hz, 2H), 2.80 (t  $J$  = 7.5 Hz, 2H), 3.29 (s, 1H), 5.15 (d,  $J$  = 15.3 Hz, 1H), 5.27 (d,  $J$  = 15.3 Hz, 1H), 6.66 (d,  $J$  = 7.9 Hz, 1H), 7.05 (t,  $J$  = 7.6 Hz, 1H), 7.15-7.20 (m, 5H), 7.23 (m, 2H), 7.33 (d,  $J$  = 8.0 Hz, 2H), 7.45 (d,  $J$  = 7.4 Hz, 1H);  $^{13}\text{C-NMR}$  (126 MHz,  $\text{CDCl}_3$ )  $\delta$  21.2, 34.6, 40.4, 69.0, 77.8, 87.2, 109.8, 123.4, 124.6, 126.3, 128.4, 128.5, 129.0, 129.1, 129.8, 129.9, 130.2, 136.4, 140.3, 141.7, 173.5; IR (neat)  $\nu$  3367, 2926, 2232, 1715, 1437, 750, 699  $\text{cm}^{-1}$ ; HRMS (ESI-TOF) calcd for  $\text{C}_{25}\text{H}_{19}\text{Cl}_2\text{NO}_2$   $[\text{M}+\text{H}]^+$  436.0866, found 436.0877; HPLC (Chiralpak AD-H, hexane:isopropanol = 70:30, 1  $\text{mL min}^{-1}$ ,  $\lambda$  = 254 nm):  $t_R$  (major) = 12.0 min,  $t_R$  (minor) = 17.2 min.

**(R)-3-(4-bromobut-1-yn-1-yl)-1-(2,6-dichlorobenzyl)-3-hydroxyindolin-2-one (3n).** This

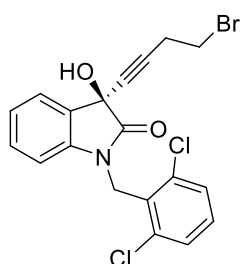

compound was obtained from the isatin **1c** (0.11 mmol, 34 mg). White solid, yield: 30 mg, 62%; m.p. 166-168  $^\circ\text{C}$ ;  $[\alpha]_D^{25}$  = -65.3 (c 0.2,  $\text{CH}_2\text{Cl}_2$ , 98% ee);  $^1\text{H-NMR}$  (400 MHz,  $\text{CDCl}_3$ )  $\delta$  2.79 (td,  $J_1$  = 7.4 Hz,  $J_2$  = 2.0 Hz, 2H), 3.40 (td,  $J_1$  = 7.4 Hz,  $J_2$  = 1.9 Hz, 2H), 3.45 (s, 1H), 5.14 (d,  $J$  = 15.2 Hz, 1H), 5.29 (d,  $J$  = 15.2 Hz, 1H), 6.67 (d,  $J$  = 7.9 Hz, 1H), 7.06 (t,  $J$  = 7.5 Hz, 1H), 7.16-7.23 (m, 2H), 7.34 (d,  $J$  = 8.1 Hz, 2H), 7.50 (d,  $J$  = 7.4 Hz, 1H);  $^{13}\text{C-NMR}$  (100 MHz,  $\text{CDCl}_3$ )  $\delta$  23.3, 28.6, 40.4, 68.9, 79.1, 84.2, 109.9, 123.5, 124.6, 128.7, 129.0, 129.1, 129.7, 130.0, 130.4, 136.4, 141.8, 173.3; IR (neat)  $\nu$  3356, 2940, 2242, 1711, 1165, 753  $\text{cm}^{-1}$ ; HRMS (ESI-TOF) calcd for  $\text{C}_{19}\text{H}_{14}\text{BrCl}_2\text{NO}_2$   $[\text{M}+\text{H}]^+$  437.9658, found 437.9672; HPLC (Chiralpak AD-H, hexane:isopropanol = 70:30, 1  $\text{mL min}^{-1}$ ,  $\lambda$  = 254 nm):  $t_R$  (major) = 10.1 min,  $t_R$  (minor) = 13.8 min.

**(S)-1-(2,6-dichlorobenzyl)-3-hydroxy-3-((trimethylsilyl)ethynyl)indolin-2-one (3o).** This

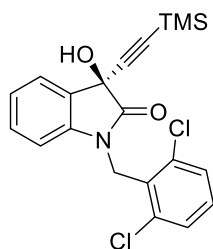

compound was obtained from the isatin **1c** (0.12 mmol, 37 mg). Colorless oil, yield: 28 mg, 57%.  $[\alpha]_D^{25}$  = -73.3 (c 0.4,  $\text{CH}_2\text{Cl}_2$ , 90% ee);  $^1\text{H-NMR}$  (400 MHz,  $\text{CDCl}_3$ )  $\delta$  0.16 (s, 9H), 3.28 (s, 1H), 5.13 (d,  $J$  = 15.2 Hz, 1H), 5.31 (d,  $J$  = 15.4 Hz, 1H), 6.65 (d,  $J$  = 7.9 Hz, 1H), 7.06 (t,  $J$  = 7.5 Hz, 1H), 7.16-7.22 (m, 2H), 7.34 (d,  $J$  = 8.4 Hz, 2H), 7.50 (d,  $J$  = 7.4 Hz, 1H);  $^{13}\text{C-NMR}$  (100 MHz,  $\text{CDCl}_3$ ):  $\delta$  -0.4, 40.4, 69.2, 92.2, 101.1, 109.8, 123.5, 124.7, 128.6, 129.0, 129.7, 129.9, 130.4,



136.4, 141.9, 173.1; IR (neat)  $\nu$  3370, 2955, 2160, 1714, 981, 844, 753  $\text{cm}^{-1}$ ; HRMS (ESI-TOF) calcd for  $\text{C}_{20}\text{H}_{19}\text{Cl}_2\text{NO}_2\text{Si}$   $[\text{M}+\text{H}]^+$  404.0635, found 404.0636; HPLC (Phenomenex Lux-Cellulose-1, hexane:isopropanol = 95:5, 1  $\text{mL min}^{-1}$ ,  $\lambda$  = 254 nm):  $t_{\text{R}}$  (major) = 12.1 min,  $t_{\text{R}}$  (minor) = 18.2 min.

**(R)-3-(3-((tert-butyldimethylsilyloxy)prop-1-yn-1-yl)-1-(2,6-dichlorobenzyl)-3-**

**hydroxyindolin-2-one (3p).** This compound was obtained from the isatin **1c** (0.11 mmol, 33 mg).

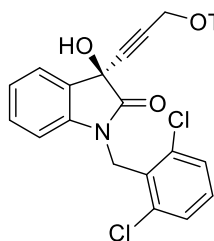

Yellowish oil, yield: 29 mg, 56%.  $[\alpha]_{\text{D}}^{25}$  = -37.8 (*c* 0.5,  $\text{CH}_2\text{Cl}_2$ , 70% ee);  $^1\text{H-NMR}$  (400 MHz,  $\text{CDCl}_3$ )  $\delta$  0.07 (s, 6H), 0.86 (s, 9H), 3.42 (s, 1H), 5.14 (d,  $J$  = 15.2 Hz, 1H), 5.27 (d,  $J$  = 15.3 Hz, 1H), 6.66 (d,  $J$  = 7.9 Hz, 1H), 7.05 (t,  $J$  = 7.5 Hz, 1H), 7.16-7.22 (m, 2H), 7.33 (d,  $J$  = 8.0 Hz, 2H), 7.50 (d,  $J$  = 7.4 Hz, 1H);  $^{13}\text{C-NMR}$  (100 MHz,  $\text{CDCl}_3$ )  $\delta$  5.2, 18.2, 25.7, 40.4,

51.7, 68.9, 81.3, 85.5, 109.8, 123.4, 124.7, 128.5, 129.0, 129.7, 129.9, 130.4, 136.4, 141.8, 173.1; IR (neat)  $\nu$  3389, 2929, 1722, 1089, 996, 836, 778  $\text{cm}^{-1}$ ; HRMS (ESI-TOF) calcd for  $\text{C}_{24}\text{H}_{27}\text{Cl}_2\text{NO}_3\text{Si}$   $[\text{M}+\text{H}]^+$  476.1210, found 476.1187; HPLC (Phenomenex Lux-Cellulose-1, hexane:isopropanol = 90:10, 1  $\text{mL min}^{-1}$ ,  $\lambda$  = 254 nm):  $t_{\text{R}}$  (major) = 11.8 min,  $t_{\text{R}}$  (minor) = 18.0 min.

**(R)-1-(2,6-dichlorobenzyl)-5-fluoro-3-hydroxy-3-(phenylethynyl)indolin-2-one (4a).** This

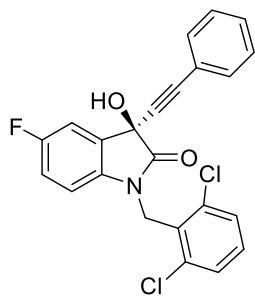

compound was obtained from the isatin **1g** (0.10 mmol, 34 mg). White solid, yield: 34 mg, 76%; m.p. 204-206  $^{\circ}\text{C}$ ;  $[\alpha]_{\text{D}}^{25}$  = -24.5 (*c* 0.8,  $\text{CH}_2\text{Cl}_2$ , 96% ee);  $^1\text{H NMR}$  (400 MHz,  $\text{CDCl}_3$ )  $\delta$  3.49 (s, 1H), 5.16 (d,  $J$  = 15.3 Hz, 1H), 5.32 (d,  $J$  = 15.6 Hz, 1H), 6.61 (dd,  $J_1$  = 8.7 Hz,  $J_2$  = 4.0 Hz, 1H), 6.90 (td,  $J_1$  = 8.9 Hz,  $J_2$  = 2.7 Hz, 1H), 7.22 (dd,  $J_1$  = 8.6 Hz,  $J_2$  = 7.4 Hz, 1H), 7.27-7.36 (m, 6H), 7.42-7.45 (m, 2H);  $^{13}\text{C NMR}$  (100 MHz,  $\text{DMSO-d}_6$ )  $\delta$  40.5,

68.9, 85.2, 87.5, 110.7 (d,  $J$  = 8.5 Hz), 112.7 (d,  $J$  = 24.9 Hz), 116.6, 116.8, 121.5, 129.2, 129.6, 129.7, 130.2, 131.2, 131.9, 132.4 (d,  $J$  = 7.7 Hz), 135.8, 138.1, 159.0 (d,  $J$  = 239.8 Hz), 172.8;  $^{19}\text{F NMR}$  (376 MHz,  $\text{CDCl}_3$ )  $\delta$  -118.9; IR (neat)  $\nu$  3340, 2924, 1713, 1489, 1442, 1264, 1137, 764, 695, 579  $\text{cm}^{-1}$ ; HRMS (ESI-TOF) calcd for  $\text{C}_{23}\text{H}_{15}\text{Cl}_2\text{FNO}_2$   $[\text{M}+\text{H}]^+$  426.0458, found 426.0470; HPLC (Chiralpak AD-H, hexane:isopropanol = 70:30, 1  $\text{mL min}^{-1}$ ,  $\lambda$  = 254 nm):  $t_{\text{R}}$  (major) = 10.8 min,  $t_{\text{R}}$  (minor) = 12.6 min.

**(R)-5-chloro-1-(2,6-dichlorobenzyl)-3-hydroxy-3-(phenylethynyl)indolin-2-one (4b).** This

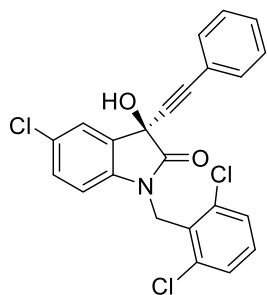

compound was obtained from the isatin **1h** (0.10 mmol, 35 mg). White solid, yield: 30 mg, 66%; m.p. 224-226  $^{\circ}\text{C}$ ;  $[\alpha]_{\text{D}}^{25}$  = -92.6 (*c* 0.3,  $\text{CH}_2\text{Cl}_2$ , 84% ee);  $^1\text{H NMR}$  (500 MHz,  $\text{CDCl}_3$ )  $\delta$  3.45 (s, 1H), 5.16 (d,  $J$  = 15.3 Hz, 1H), 5.32 (d,  $J$  = 15.6 Hz, 1H), 6.61 (d,  $J$  = 8.5 Hz, 1H), 7.17 (dd,  $J_1$  = 8.5 Hz,  $J_2$  = 2.2 Hz, 1H), 7.22 (dd,  $J_1$  = 8.6 Hz,  $J_2$  = 7.6 Hz, 1H), 7.28-7.32 (m,

3H), 7.35 (d,  $J = 8.0$  Hz, 2H), 7.43-7.45 (m, 2H), 7.55 (d,  $J = 2.2$  Hz, 1H);  $^{13}\text{C}$  NMR (100 MHz, DMSO- $d_6$ )  $\delta$  40.6, 68.7, 85.3, 87.3, 111.3, 121.4, 124.8, 127.6, 129.2, 129.6, 129.7, 130.1, 130.2, 131.2, 131.9, 132.6, 135.8, 140.7, 172.6; IR (neat)  $\nu$  3347, 2924, 1721, 1438, 1170, 978, 753, 688  $\text{cm}^{-1}$ ; HRMS (ESI-TOF): calcd for  $\text{C}_{23}\text{H}_{15}\text{Cl}_3\text{NO}_2$   $[\text{M}+\text{H}]^+$ : 442.0163, found: 442.0169. HPLC (Chiralpak AD-H, hexane:isopropanol = 85:15, 1 mL  $\text{min}^{-1}$ ,  $\lambda = 254$  nm):  $t_{\text{R}}$  (major) = 20.1 min,  $t_{\text{R}}$  (minor) = 22.7 min.

**(R)-5-bromo-1-(2,6-dichlorobenzyl)-3-hydroxy-3-(phenylethynyl)indolin-2-one (4c).** This

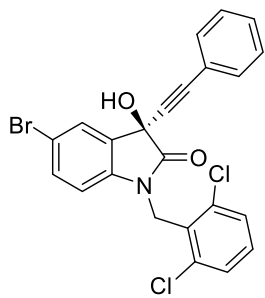

compound was obtained from the isatin **1i** (0.10 mmol, 50 mg). Colorless oil, yield: 23 mg, 45%;  $[\alpha]_{\text{D}}^{25} = -120.5$  ( $c$  0.4,  $\text{CH}_2\text{Cl}_2$ , 99% ee);  $^1\text{H}$  NMR (500 MHz,  $\text{CDCl}_3$ )  $\delta$  3.44 (s, 1H), 5.15 (d,  $J = 15.3$  Hz, 1H), 5.31 (d,  $J = 15.6$  Hz, 1H), 6.56 (d,  $J = 8.4$  Hz, 1H), 7.22 (dd,  $J_1 = 8.6$  Hz,  $J_2 = 7.5$  Hz, 1H), 7.27-7.32 (m, 3H), 7.35 (d,  $J = 8.0$  Hz, 2H), 7.43-7.46 (m, 2H), 7.68 (d,  $J = 2.1$  Hz, 1H);  $^{13}\text{C}$  NMR (100 MHz, DMSO- $d_6$ )  $\delta$  40.6, 68.7, 85.3,

87.3, 111.8, 115.2, 121.4, 127.5, 127.6, 129.2, 129.6, 129.7, 130.1, 131.2, 131.9, 132.9, 133.1, 135.8, 141.2, 172.4; IR (neat)  $\nu$  3337, 1717, 1601, 1485, 1434, 1329, 166, 981, 757, 692  $\text{cm}^{-1}$ ; HRMS (ESI-TOF) calcd for  $\text{C}_{23}\text{H}_{15}\text{BrCl}_2\text{NO}_2$   $[\text{M}+\text{H}]^+$  485.9658, found 485.9669; HPLC (Chiralpak AD-H, hexane:isopropanol = 85:15, 1 mL  $\text{min}^{-1}$ ,  $\lambda = 254$  nm):  $t_{\text{R}}$  (major) = 19.3 min,  $t_{\text{R}}$  (minor) = 22.3 min.

**(R)-1-(2,6-dichlorobenzyl)-3-hydroxy-5-methyl-3-(phenylethynyl)indolin-2-one (4d).** This

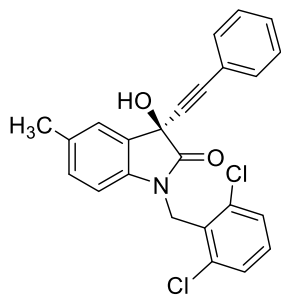

compound was obtained from the isatin **1j** (0.10 mmol, 34 mg). White solid, yield: 26 mg, 58%; m.p. 220-222  $^{\circ}\text{C}$ ;  $[\alpha]_{\text{D}}^{25} = -168.8$  ( $c$  0.6,  $\text{CH}_2\text{Cl}_2$ , 94% ee);  $^1\text{H}$  NMR (400 MHz,  $\text{CDCl}_3$ )  $\delta$  2.30 (s, 3H), 3.42 (s, 1H), 5.15 (d,  $J = 15.3$  Hz, 1H), 5.31 (d,  $J = 15.6$  Hz, 1H), 6.57 (d,  $J = 8.1$  Hz, 1H), 6.99 (ddt,  $J_1 = 8.1$  Hz,  $J_2 = 1.8$  Hz,  $J_3 = 0.7$  Hz, 1H), 7.20 (dd,  $J_1 = 8.6$  Hz,  $J_2 = 7.4$  Hz, 1H), 7.27-7.32 (m, 3H), 7.34 (d,  $J = 8.3$  Hz, 2H), 7.40 (m, 1H),

7.42-7.46 (m, 2H);  $^{13}\text{C}$  NMR (100 MHz, DMSO- $d_6$ )  $\delta$  20.9, 39.3, 69.0, 84.7, 88.3, 109.3, 121.7, 125.4, 129.2, 129.5, 130.4, 130.5, 130.7, 131.1, 131.8, 132.7, 135.8, 139.4, 173.0; IR (neat)  $\nu$  3376, 3076, 1699, 1492, 1434, 1340, 1061, 760, 695  $\text{cm}^{-1}$ ; HRMS (ESI-TOF) calcd for  $\text{C}_{24}\text{H}_{18}\text{Cl}_2\text{NO}_2$   $[\text{M}+\text{H}]^+$  422.0709, found 422.0716; HPLC (Chiralpak AD-H, hexane:isopropanol = 70:30, 1 mL  $\text{min}^{-1}$ ,  $\lambda = 254$  nm):  $t_{\text{R}}$  (major) = 11.7 min,  $t_{\text{R}}$  (minor) = 15.2 min.

**(R)-1-(2,6-dichlorobenzyl)-3-hydroxy-5-methoxy-3-(phenylethynyl)indolin-2-one (4e).** This

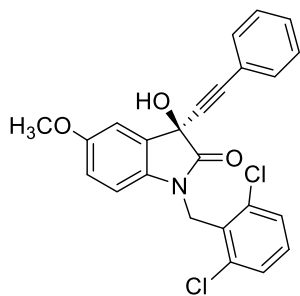

compound was obtained from the isatin **1k** (0.10 mmol, 35 mg). White solid, yield: 32 mg, 71%; m.p. 206-209 °C;  $[\alpha]_D^{25} = -141.5$  (c 0.6, CH<sub>2</sub>Cl<sub>2</sub>, 96% ee); <sup>1</sup>H NMR (500 MHz, DMSO-d<sub>6</sub>) δ 3.68 (s, 3H), 5.00 (d, *J* = 15.4 Hz, 1H), 5.18 (d, *J* = 15.4 Hz, 1H), 6.59 (d, *J* = 8.6 Hz, 1H), 6.82 (dd, *J*<sub>1</sub> = 8.7 Hz, *J*<sub>2</sub> = 2.6 Hz, 1H), 7.09 (d, *J* = 2.7 Hz, 1H), 7.22 (s, 1H), 7.35-7.38 (m, 6H), 7.50 (d, *J* = 8.1 Hz, 2H); <sup>13</sup>C NMR (100 MHz,

DMSO-d<sub>6</sub>) δ 40.5, 55.9, 69.2, 84.8, 88.2, 110.1, 111.7, 114.7, 121.7, 129.2, 129.6, 130.4, 131.1, 131.2, 131.8, 131.9, 134.9, 135.9, 156.2, 172.7; IR (neat) ν 3304, 2927, 1706, 1489, 1442, 985, 757, 684 cm<sup>-1</sup>; HRMS (ESI-TOF) calcd for C<sub>24</sub>H<sub>18</sub>Cl<sub>2</sub>NO<sub>3</sub> [M+H]<sup>+</sup> 438.0658, found 438.0671; HPLC (Chiralpak AD-H, hexane:isopropanol = 70:30, 1 mL min<sup>-1</sup>, λ = 254 nm): *t*<sub>R</sub> (major) = 14.9 min, *t*<sub>R</sub> (minor) = 21.6 min

**(R)-1-(2,6-dichlorobenzyl)-3-hydroxy-5-nitro-3-(phenylethynyl)indolin-2-one (4f).** This

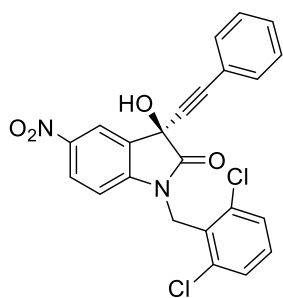

compound was obtained from the isatin **1l** (0.11 mmol, 38 mg). Yellow oil, yield: 23 mg, 47%.  $[\alpha]_D^{25} = -76.3$  (c 0.6, CH<sub>2</sub>Cl<sub>2</sub>, 96% ee); <sup>1</sup>H NMR (400 MHz, DMSO-d<sub>6</sub>) δ 5.18 (d, *J* = 15.5 Hz, 1H), 5.29 (d, *J* = 15.5 Hz, 1H), 7.04 (d, *J* = 9.5 Hz, 1H), 7.37-7.41 (m, 6H), 7.55 (dd, *J*<sub>1</sub> = 8.1 Hz, *J*<sub>2</sub> = 0.6 Hz, 2H), 7.64 (s, 1H), 8.27-8.30 (m, 2H); <sup>13</sup>C NMR (100 MHz, DMSO-d<sub>6</sub>) δ 41.2, 68.2, 85.7, 86.5, 110.3, 120.0, 121.2, 127.5, 129.2,

129.6, 129.8, 129.9, 131.3, 131.4, 131.5, 132.0, 135.8, 143.5, 147.7, 173.1; IR (neat) ν 3387, 1735, 1612, 1485, 1431, 1337, 1079, 750, 695 cm<sup>-1</sup>; HRMS (ESI-TOF) calcd for C<sub>23</sub>H<sub>14</sub>Cl<sub>2</sub>N<sub>2</sub>NaO<sub>4</sub> [M+Na]<sup>+</sup> 475.0223, found 475.0234; HPLC (Phenomenex Lux Amylose-2, hexane:isopropanol = 80:20, 1 mL min<sup>-1</sup>, λ = 254 nm): *t*<sub>R</sub> (major) = 34.0 min, *t*<sub>R</sub> (minor) = 42.2 min.

**(R)-1-(2,6-dichlorobenzyl)-3-hydroxy-7-methyl-3-(phenylethynyl)indolin-2-one (4g).** This

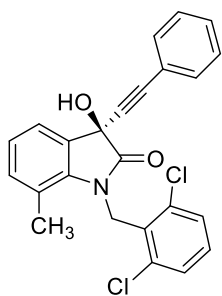

compound was obtained from the isatin **1m** (0.11 mmol, 36 mg). Yellow oil, yield: 37 mg, 77%;  $[\alpha]_D^{25} = +71.5$  (c 0.5, CH<sub>2</sub>Cl<sub>2</sub>, 90% ee); <sup>1</sup>H NMR (500 MHz, DMSO-d<sub>6</sub>) δ 2.37 (s, 3H), 5.34 (d, *J* = 3.2 Hz, 2H), 7.00 (t, *J* = 7.5 Hz, 1H), 7.08 (ddd, *J*<sub>1</sub> = 7.7 Hz, *J*<sub>2</sub> = 1.5 Hz, *J*<sub>3</sub> = 0.8 Hz, 1H), 7.11 (s, 1H), 7.29-7.38 (m, 7H), 7.44 (d, *J* = 8.4 Hz, 2H); <sup>13</sup>C NMR (100 MHz, DMSO-d<sub>6</sub>) δ 19.2, 43.4, 68.3, 84.7, 88.3, 120.5, 121.8, 122.8, 123.5, 129.2, 129.5, 130.2, 130.3, 131.5,

131.7, 132.0, 134.1, 135.1, 140.6, 174.0; IR (neat) ν 3380, 2971, 1713, 1449, 1366, 1116, 949, 750, 688 cm<sup>-1</sup>; HRMS (ESI-TOF) calcd for C<sub>24</sub>H<sub>18</sub>Cl<sub>2</sub>NO<sub>2</sub> [M+H]<sup>+</sup> 422.0709, found: 422.0714; HPLC (Chiralpak AD-H, hexane:isopropanol = 70:30, 1 mL min<sup>-1</sup>, λ = 254 nm): *t*<sub>R</sub> (major) = 11.8 min, *t*<sub>R</sub> (minor) = 18.4 min.

**(R)-1-(2,6-dichlorobenzyl)-3-hydroxy-5-methoxy-3-(p-tolylolethynyl)indolin-2-one (4h).** This

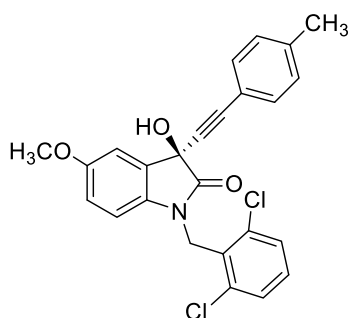

compound was obtained from the isatin **1k** (0.10 mmol, 35 mg). White solid, yield: 35 mg, 75%; m.p. 227-228 °C;  $[\alpha]_D^{25} = -308.1$  (c 0.5, CH<sub>2</sub>Cl<sub>2</sub>, 99% ee); <sup>1</sup>H NMR (400 MHz, DMSO-d<sub>6</sub>) δ 2.28 (s, 3H), 3.69 (s, 3H), 5.00 (d, *J* = 15.4, 1H), 5.18 (d, *J* = 15.4, 1H), 6.59 (d, *J* = 8.6 Hz, 1H), 6.82 (dd, *J*<sub>1</sub> = 8.7 Hz, *J*<sub>2</sub> = 2.6 Hz, 1H), 7.08 (d, *J* = 2.6 Hz, 1H), 7.16 (s, 1H), 7.18 (d, *J* = 4.6 Hz, 2H), 7.26 (d, *J* = 7.8 Hz, 2H), 7.37 (t, *J* = 8.0 Hz, 1H), 7.50 (d, *J* = 8.0 Hz, 2H); <sup>13</sup>C NMR (100 MHz, DMSO-d<sub>6</sub>) δ 21.4, 40.5, 56.0, 69.2, 85.0, 87.5, 110.1, 111.7, 114.7, 118.7, 129.5, 129.8, 130.4, 131.1, 131.8, 132.0, 134.9, 135.9, 139.4, 156.1, 172.8; IR (neat) ν 3329, 1710, 1496, 1188, 1155, 807, 692 cm<sup>-1</sup>; HRMS (ESI-TOF) calcd for C<sub>25</sub>H<sub>20</sub>Cl<sub>2</sub>NO<sub>3</sub> [M+H]<sup>+</sup> 452.0815, found 452.0823; HPLC (Chiralpak AD-H, hexane:isopropanol = 70:30, 1 mL min<sup>-1</sup>, λ = 254 nm): *t*<sub>R</sub> (major) = 12.4 min, *t*<sub>R</sub> (minor) = 20.1 min.

**(S)-1-(2,6-dichlorobenzyl)-3-hydroxy-5-methoxy-3-((trimethylsilyl)ethynyl)indolin-2-one (4i).**

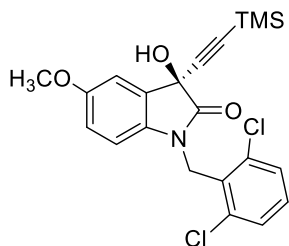

This compound was obtained from the isatin **1k** (0.11 mmol, 36 mg). Colorless oil, yield, 23 mg 50%;  $[\alpha]_D^{25} = -119.7$  (c 0.3, CH<sub>2</sub>Cl<sub>2</sub>, 88% ee); <sup>1</sup>H NMR (400 MHz, CDCl<sub>3</sub>) δ 0.16 (s, 9H), 3.37 (s, 1H), 3.76 (s, 3H), 5.11 (d, *J* = 14.8 Hz, 1H), 5.28 (d, *J* = 14.8 Hz, 1H), 6.55 (dd, *J*<sub>1</sub> = 8.6 Hz, *J*<sub>2</sub> = 0.7 Hz, 1H), 6.70 (ddt, *J*<sub>1</sub> = 8.5 Hz, *J*<sub>2</sub> = 2.5 Hz, *J*<sub>3</sub> = 0.5 Hz, 1H), 7.11 (dd, *J*<sub>1</sub> = 2.7 Hz, *J*<sub>2</sub> = 0.7 Hz, 1H), 7.20 (ddd, *J*<sub>1</sub> = 8.5 Hz, *J*<sub>2</sub> = 7.4 Hz, *J*<sub>3</sub> = 0.9 Hz, 1H), 7.33 (dd, *J*<sub>1</sub> = 8.1 Hz, *J*<sub>2</sub> = 0.6 Hz, 2H); <sup>13</sup>C NMR (100 MHz, CDCl<sub>3</sub>) δ -0.37, 40.4, 55.7, 69.5, 92.3, 101.1, 110.4, 111.3, 115.2, 128.9, 129.7, 129.8, 129.9, 135.0, 136.4, 156.4, 172.9. IR (neat): ν = 3405, 1717, 1485, 1431, 1213, 1036, 807, 601 cm<sup>-1</sup>; HRMS (ESI-TOF) calcd for C<sub>21</sub>H<sub>22</sub>Cl<sub>2</sub>NO<sub>3</sub>Si [M+H]<sup>+</sup> 434.0741, found 434.0756; HPLC (Phenomenex Lux Cellulose-1, hexane:isopropanol = 95:5, 1 mL min<sup>-1</sup>, λ = 254 nm): *t*<sub>R</sub> (major) = 13.5 min, *t*<sub>R</sub> (minor) = 16.0 min

**(R)-1-(2,6-dichlorobenzyl)-3-hydroxy-7-methyl-3-(p-tolylolethynyl)indolin-2-one (4j).** This

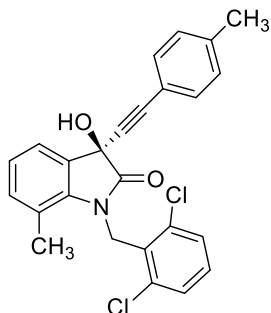

compound was obtained from the isatin **1m** (0.11 mmol, 35 mg). White solid, yield: 36 mg, 75%; m.p. 182-183 °C;  $[\alpha]_D^{25} = +86.5$  (c 0.5, CH<sub>2</sub>Cl<sub>2</sub>, 94% ee); <sup>1</sup>H NMR (400 MHz, DMSO-d<sub>6</sub>) δ 2.28 (s, 3H), 2.36 (s, 3H), 5.34 (d, *J* = 2.1 Hz, 2H), 6.99 (t, *J* = 7.5 Hz, 1H), 7.07-7.09 (m, 2H), 7.15-7.23 (m, 4H), 7.29-7.35 (m, 4H), 7.44 (d, *J* = 8.4 Hz, 2H); <sup>13</sup>C NMR (100 MHz, DMSO-d<sub>6</sub>) δ 19.2, 21.4, 43.4, 68.3, 84.8, 87.6, 118.7, 120.5, 122.8, 123.4, 129.5, 129.8, 130.2, 131.6, 131.7, 132.0, 134.1, 135.0, 139.3, 140.6, 174.1; IR (neat) ν 3286, 176, 1362, 1195, 1112, 1018, 811, 775, 742 cm<sup>-1</sup>; HRMS (ESI-TOF) calcd for C<sub>25</sub>H<sub>20</sub>Cl<sub>2</sub>NO<sub>2</sub>

[M+H]<sup>+</sup> 436.0866, found 436.0879; HPLC (Chiralpak AD-H, hexane:isopropanol=70:30, 1 mL min<sup>-1</sup>, λ = 254 nm) t<sub>R</sub> (major) = 10.5 min, t<sub>R</sub> (minor) = 17.7 min.

**(S)-1-(2,6-dichlorobenzyl)-3-hydroxy-7-methyl-3-((trimethylsilyl)ethynyl)indolin-2-one (4k).**

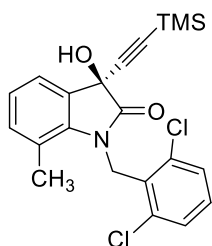

This compound was obtained from the isatin **1m** (0.12 mmol, 40 mg). Colorless oil, yield: 32 mg, 61%; [α]<sub>D</sub><sup>25</sup> = +83.0 (c 0.3, CH<sub>2</sub>Cl<sub>2</sub>, 90% ee); <sup>1</sup>H NMR (400 MHz, CDCl<sub>3</sub>) δ 0.14 (s, 9H), 2.33 (s, 3H), 3.18 (s, 1H), 5.37 (d, J = 16.4 Hz, 1H), 5.46 (d, J = 16.4 Hz, 1H), 7.00-7.06 (m, 2H), 7.14-7.18 (m, 1H), 7.29 (d, J = 7.6 Hz, 2H), 7.39-7.41 (m, 1H); <sup>13</sup>C NMR (100 MHz, CDCl<sub>3</sub>) δ -0.39, 18.9, 43.4, 68.6, 92.0, 101.9, 120.3, 122.8, 123.6, 129.0, 129.4, 131.3, 134.3, 135.3, 140.7, 174.3; IR (neat) ν 3351, 1699, 1358, 1155, 775, 739, 576 cm<sup>-1</sup>; HRMS (ESI-TOF) calcd for C<sub>21</sub>H<sub>22</sub>Cl<sub>2</sub>NO<sub>2</sub>Si [M+H]<sup>+</sup> 418.0791, found: 418.0801; HPLC (Phenomenex Lux Cellulose-1, hexane:isopropanol = 95:5, 1 mL min<sup>-1</sup>, λ = 254 nm): t<sub>R</sub> (major) = 13.4 min, t<sub>R</sub> (minor) = 19.0 min.

**(R)-3-(cyclopropylethynyl)-3-hydroxy-1-methylindolin-2-one (5a).** This compound was

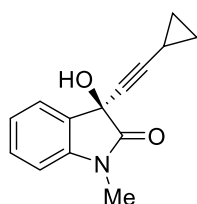

obtained from the isatin **1a** (0.19 mmol, 30 mg). Yellow solid, yield: 30 mg, 70%; m.p. 177-180 °C; <sup>1</sup>H NMR (400 MHz, CDCl<sub>3</sub>) δ 0.67-0.77 (4H), 1.24 (m, 1H), 3.19 (s, 3H), 3.68 (s, 1H), 6.81 (d, J = 7.8 Hz, 1H), 7.10 (dd, J<sub>1</sub> = 11.0 Hz, J<sub>2</sub> = 4.1 Hz, 2H), 7.33 (t, J = 7.8 Hz, 1H), 7.49 (d, J = 7.4 Hz, 1H); <sup>13</sup>C NMR (100 MHz, CDCl<sub>3</sub>) δ 0.43, 8.41, 8.44, 26.5, 69.1, 72.0, 90.8, 108.6, 123.5, 124.4, 129.3, 130.1, 142.9, 174.1; IR (neat) ν 3277, 2232, 1703, 1609, 1468, 1374, 1348, 1088, 1014, 919, 765, 648 cm<sup>-1</sup>; HRMS (ESI-TOF) calcd for C<sub>14</sub>H<sub>13</sub>NO<sub>2</sub> [M+Na]<sup>+</sup> 250.0838, found 250.0842; HPLC (Phenomenex Lux i-Amylose-3, hexane:isopropanol = 90:10, 1 mL min<sup>-1</sup>, λ = 254 nm): t<sub>R</sub> (major) = 21.3 min, t<sub>R</sub> (minor) = 24.0 min. [α]<sub>D</sub><sup>25</sup> = -22.0 (c = 0.5, CH<sub>2</sub>Cl<sub>2</sub>, 96% ee).

**(R)-3-(hex-1-yn-1-yl)-3-hydroxy-1-methylindolin-2-one (5b).** This compound was obtained

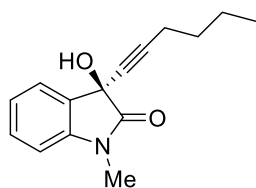

from the isatin **1a** (0.17 mmol, 28 mg). Colorless oil, yield: 25 mg, 60%; [α]<sub>D</sub><sup>25</sup> = -16.1 (c 0.5, CH<sub>2</sub>Cl<sub>2</sub>, 74% ee); <sup>1</sup>H NMR (400 MHz, CDCl<sub>3</sub>) δ 0.86 (t, J = 7.3 Hz, 3H), 1.35 (m, 2H), 1.46 (m, 2H), 2.20 (dd, J = 10.7, 3.8 Hz, 2H), 3.20 (s, 3H), 3.63 (s, 1H), 6.82 (d, J = 7.8 Hz, 1H), 7.12 (t, J = 7.6 Hz, 1H), 7.33 (dd, J<sub>1</sub> = 11.4 Hz, J<sub>2</sub> = 4.1 Hz, 1H), 7.51 (dd, J<sub>1</sub> = 7.4 Hz, J<sub>2</sub> = 1.2 Hz, 1H); <sup>13</sup>C NMR (100 MHz, CDCl<sub>3</sub>) δ 13.5, 18.5, 21.8, 26.5, 30.2, 69.1, 76.8, 87.5, 108.6, 123.5, 124.4, 129.3, 130.2, 142.9, 174.2; IR (neat) ν 3311, 1713, 1606, 1459, 1363, 1090, 1017, 751, 740, 700 cm<sup>-1</sup>; HRMS (ESI-TOF) calcd for C<sub>15</sub>H<sub>17</sub>NO<sub>2</sub> [M+Na]<sup>+</sup> 266.1151, found 266.1158; HPLC (Phenomenex Lux i-Amylose-3, hexane:isopropanol = 90:10, 1 mL min<sup>-1</sup>, λ = 254 nm): t<sub>R</sub> (major) = 15.5 min, t<sub>R</sub> (minor) = 17.7 min.

#### 4. General procedure for the synthesis of racemic 3-alkynyl-3-hydroxyoxindoles.

To a solution of  $\text{ZnMe}_2$  in toluene (1.2 M, 0.4 mmol) under nitrogen atmosphere was added the corresponding alkyne (0.4 mmol) and the mixture was stirred at rt for 1 h. Then, a solution of the isatin (0.1 mmol) in  $\text{CH}_2\text{Cl}_2$  (1.5 mL) was added dropwise and the reaction stirred at rt for 24 h. The reaction was quenched with  $\text{NH}_4\text{Cl}$ , extracted with  $\text{CH}_2\text{Cl}_2$ , dried over  $\text{MgSO}_4$ , filtered and concentrated. Purification by silica gel column chromatography afforded the pure racemic product.

#### 5. Synthesis and characterization data of isatin ketimines

##### 5.1. Synthesis of isatin ketimines 6a and 6c-f.<sup>8</sup>

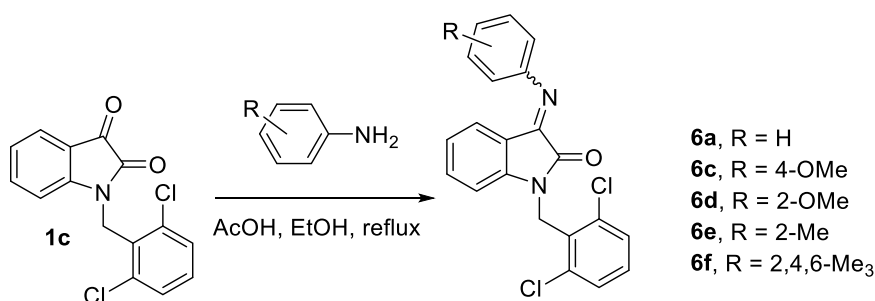

To a solution of isatin **1c** (1.6 mmol) and the corresponding aniline (1.6 mmol) in ethanol (45 mL) was added acetic acid (0.05 mL) and the reaction was refluxed until consumption of the starting materials (typically between 2-5 h, only **6d** was refluxed for 15 h). The mixture was allowed to cool to rt and 2/3 of the solvent were removed under vacuo. The resulting solid was filtrated and recrystallized from ethanol to afford the pure product.

##### 5.2. Synthesis a of Isatin Ketimines 6b and 6g-t.<sup>9</sup>

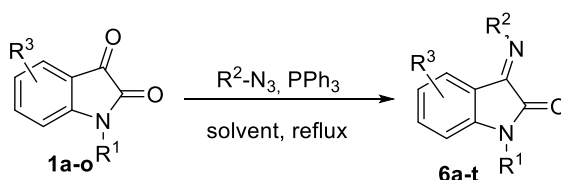

- 6b**, R<sup>1</sup> = 2,6-Cl<sub>2</sub>-C<sub>6</sub>H<sub>3</sub>-CH<sub>2</sub>, R<sup>2</sup> = 4-CF<sub>3</sub>-C<sub>6</sub>H<sub>4</sub>, R<sup>3</sup> = H  
**6g**, R<sup>1</sup> = 2,6-Cl<sub>2</sub>-C<sub>6</sub>H<sub>3</sub>-CH<sub>2</sub>, R<sup>2</sup> = 3,5-Cl<sub>2</sub>-C<sub>6</sub>H<sub>3</sub>, R<sup>3</sup> = H  
**6h**, R<sup>1</sup> = Bn, R<sup>2</sup> = 3,5-Cl<sub>2</sub>-C<sub>6</sub>H<sub>3</sub>, R<sup>3</sup> = H  
**6i**, R<sup>1</sup> = CH<sub>3</sub>, R<sup>2</sup> = 3,5-Cl<sub>2</sub>-C<sub>6</sub>H<sub>3</sub>, R<sup>3</sup> = H  
**6j**, R<sup>1</sup> = MOM, R<sup>2</sup> = 3,5-Cl<sub>2</sub>-C<sub>6</sub>H<sub>3</sub>, R<sup>3</sup> = H  
**6k**, R<sup>1</sup> = CPh<sub>3</sub>, R<sup>2</sup> = 3,5-Cl<sub>2</sub>-C<sub>6</sub>H<sub>3</sub>, R<sup>3</sup> = H  
**6l**, R<sup>1</sup> = Ac, R<sup>2</sup> = 3,5-Cl<sub>2</sub>-C<sub>6</sub>H<sub>3</sub>, R<sup>3</sup> = H  
**6m**, R<sup>1</sup> = H, R<sup>2</sup> = 3,5-Cl<sub>2</sub>-C<sub>6</sub>H<sub>3</sub>, R<sup>3</sup> = H  
**6n**, R<sup>1</sup> = 2,6-Cl<sub>2</sub>-C<sub>6</sub>H<sub>3</sub>-CH<sub>2</sub>, R<sup>2</sup> = 3,5-Cl<sub>2</sub>-C<sub>6</sub>H<sub>3</sub>, R<sup>3</sup> = 5-F  
**6o**, R<sup>1</sup> = 2,6-Cl<sub>2</sub>-C<sub>6</sub>H<sub>3</sub>-CH<sub>2</sub>, R<sup>2</sup> = 3,5-Cl<sub>2</sub>-C<sub>6</sub>H<sub>3</sub>, R<sup>3</sup> = 5-Cl  
**6p**, R<sup>1</sup> = 2,6-Cl<sub>2</sub>-C<sub>6</sub>H<sub>3</sub>-CH<sub>2</sub>, R<sup>2</sup> = 3,5-Cl<sub>2</sub>-C<sub>6</sub>H<sub>3</sub>, R<sup>3</sup> = 5-Br  
**6q**, R<sup>1</sup> = 2,6-Cl<sub>2</sub>-C<sub>6</sub>H<sub>3</sub>-CH<sub>2</sub>, R<sup>2</sup> = 3,5-Cl<sub>2</sub>-C<sub>6</sub>H<sub>3</sub>, R<sup>3</sup> = 5-CH<sub>3</sub>  
**6r**, R<sup>1</sup> = 2,6-Cl<sub>2</sub>-C<sub>6</sub>H<sub>3</sub>-CH<sub>2</sub>, R<sup>2</sup> = 3,5-Cl<sub>2</sub>-C<sub>6</sub>H<sub>3</sub>, R<sup>3</sup> = 5-OCH<sub>3</sub>  
**6s**, R<sup>1</sup> = 2,6-Cl<sub>2</sub>-C<sub>6</sub>H<sub>3</sub>-CH<sub>2</sub>, R<sup>2</sup> = 3,5-Cl<sub>2</sub>-C<sub>6</sub>H<sub>3</sub>, R<sup>3</sup> = 5-NO<sub>2</sub>  
**6t**, R<sup>1</sup> = 2,6-Cl<sub>2</sub>-C<sub>6</sub>H<sub>3</sub>-CH<sub>2</sub>, R<sup>2</sup> = 3,5-Cl<sub>2</sub>-C<sub>6</sub>H<sub>3</sub>, R<sup>3</sup> = 7-Me

To a solution of the corresponding azide (1.3 mmol), prepared according described procedures,<sup>10</sup> in ethanol (35 mL) at rt, was added PPh<sub>3</sub> (1.3 mmol) and the reaction mixture was stirred for 15 min, whereupon the corresponding isatin (1.3 mmol) was added and the mixture refluxed until consumption of the starting materials (typically between 2-5 h). The mixture was allowed to cool to rt and 2/3 of the solvent were removed under vacuo. The resulting solid was filtrated and recrystallized from ethanol or ethyl acetate to afford the pure product. For synthesis of isatin ketimines **6l**, **6n-p** and **6s** solvent was changed to 1,4-dioxane.

**1-(2,6-Dichlorobenzyl)-3-(phenylimino)indolin-2-one (6a)**. This compound was obtained from

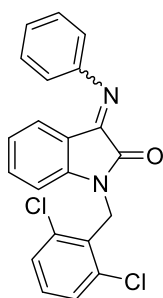

**1c** (1.6 mmol, 490 mg) Yellow solid, yield: 531g, 87%; m.p. 207-210 °C; two diastereomers *E/Z* 90:10; <sup>1</sup>H NMR (500 MHz, CDCl<sub>3</sub>,) (*E*)-**6a** δ 5.33 (s, 2H), 6.59 (d, *J* = 8.0 Hz, 1H), 6.68 (d, *J* = 7.5 Hz, 2H), 7.0 (d, *J* = 7.4 Hz, 2H), 7.18 (td, *J*<sub>1</sub> = 7.9 Hz, *J*<sub>2</sub> = 1.0 Hz, 1H), 7.23 (m, 2H), 7.36 (d, 2H), 7.42 (t, *J* = 7.8 Hz, 2H); (*Z*)-**6a** δ 5.16 (s, 2H), 6.62 (d, *J* = 8.0 Hz, 1H), 6.66 (m, 1H), 7.06 (m, 3H), 7.19-7.23 (m, 3H), 7.29 (d, *J* = 8.6 Hz, 1H), 7.33 (m, 2H), 7.71 (d, *J* = 7.5 Hz, 1H); <sup>13</sup>C NMR (126 MHz, CDCl<sub>3</sub>)

δ 40.1, 110.3, 115.9, 117.7, 119.1, 122.4, 122.9, 123.0, 125.2, 125.3, 126.1, 128.5, 129.0, 129.3, 129.7, 129.9, 129.9, 133.9, 136.3, 146.8, 150.3, 153.8, 162.8; IR (neat): ν 1736, 1605, 1467, 1349, 765 cm<sup>-1</sup>; HRMS (ESI-TOF) calcd for C<sub>21</sub>H<sub>15</sub>Cl<sub>2</sub>N<sub>2</sub>O [M+H]<sup>+</sup> 381.0556, found. 381.0560.

**1-(2,6-Dichlorobenzyl)-3-((4-(trifluoromethyl)phenyl)imino)indolin-2-one (6b)**. This compound

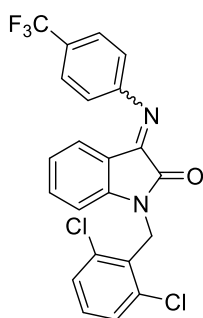

was obtained from **1c** (1.31 mmol, 400 mg) Yellow solid, yield: 351 mg, 60%, m.p. 209-211 °C.; two diastereomers *E/Z* 80:20; <sup>1</sup>H NMR (500 MHz, CDCl<sub>3</sub>) (*E*)-**6b** δ 5.33 (s, 2H), 6.52 (d, *J* = 7.6 Hz, 1H), 6.71 (d, *J* = 7.9 Hz, 2H), 7.10 (d, *J* = 8.1 Hz, 2H), 7.21-7.26 (m, 2H), 7.37 (d, *J* = 8.1 Hz, 2H), 7.69 (d, *J* = 8.3 Hz, 2H); (*Z*)-**6b** δ 5.15 (s, 2H), 6.65 (d, *J* = 7.9 Hz, 1H), 6.73 (m, 1H), 7.05-7.08 (m, 3H), 7.31 (d, *J* = 7.8 Hz, 1H), 7.34 (m, 2H), 7.62 (d, *J* = 8.2 Hz, 2H), 7.71 (m, 1H); <sup>13</sup>C NMR (126 MHz, CDCl<sub>3</sub>) δ 39.7, 40.2, 110.0, 110.6,

115.5, 117.8, 118.6, 122.6, 123.3, 123.4, 126.0 (q, *J* = 4.0 Hz), 126.2, 126.8 (q, *J* = 4.0 Hz), 127.2 (q, *J* = 33.8 Hz), 129.0, 129.5, 130.1, 134.3, 134.6, 136.3, 147.2, 153.2, 154.3, 162.4; <sup>19</sup>F NMR (470 MHz, CDCl<sub>3</sub>) (*E*)-**6b** δ -61.9; (*Z*)-**6b** δ -61.9; IR (neat) ν 1729, 1675, 1605, 1467, 1323, 1108, 751 cm<sup>-1</sup>; HRMS (ESI-TOF) calcd for C<sub>22</sub>H<sub>14</sub>Cl<sub>2</sub>F<sub>3</sub>N<sub>2</sub>O [M+H]<sup>+</sup> 449.0430, found 449.0440.

**1-(2,6-Dichlorobenzyl)-3-((4-methoxyphenyl)imino)indolin-2-one (6c).** This compound was

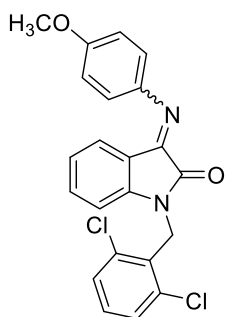

obtained from **1c** (1.6 mmol, 490 mg). Red solid, yield: 382 mg, 58%; m.p. 185-186 °C; two diastereomers *E/Z* 85:15; <sup>1</sup>H NMR (500 MHz, CDCl<sub>3</sub>) (*E*)-**6c** δ 3.86 (s, 3H), 5.33 (s, 2H), 6.68 (d, *J* = 8.0 Hz, 1H), 6.71 (td, *J*<sub>1</sub> = 7.7 Hz, *J*<sub>2</sub> = 0.8 Hz, 1H), 6.92 (d, *J* = 7.8 Hz, 1H), 6.96 (d, *J* = 8.9 Hz, 2H), 7.04 (d, *J* = 8.9 Hz, 2H), 7.18 (td, *J*<sub>1</sub> = 7.8 Hz, *J*<sub>2</sub> = 1.2 Hz, 1H), 7.23 (d, *J* = 7.7 Hz, 1H), 7.36 (d, *J* = 8.0 Hz, 2H); (*Z*)-**6c** δ 3.84 (s, 3H), 5.19 (s, 2H), 6.61 (d, *J* = 7.9 Hz, 1H), 6.93 (m, 2H), 6.96 (m, 2H), 7.04 (m, 2H), 7.21 (m, 1H), 7.28 (d, *J* = 8.9 Hz, 2H), 7.34 (d, *J* = 8.9 Hz, 2H), 7.69 (d, *J* = 8.3 Hz, 1H); <sup>13</sup>C NMR (126 MHz, CDCl<sub>3</sub>) δ 39.7, 40.1, 55.3, 55.4, 109.6, 110.3, 113.6, 114.5, 116.0, 120.1, 122.3, 122.5, 122.9, 123.2, 125.5, 129.0, 129.1, 129.8, 129.8, 129.9, 132.9, 133.7, 136.2, 136.3, 141.1, 143.0, 144.7, 146.7, 153.2, 157.2, 157.7, 158.5, 163.0; IR (neat) ν 1719, 1608, 1504, 139, 1239, 1034, 758 cm<sup>-1</sup>; HRMS (ESI-TOF): calcd for C<sub>22</sub>H<sub>17</sub>Cl<sub>2</sub>N<sub>2</sub>O<sub>2</sub> [M+H]<sup>+</sup> 411.0662, found. 411.0677.

**1-(2,6-Dichlorobenzyl)-3-((2-methoxyphenyl)imino)indolin-2-one (6d).** This compound was

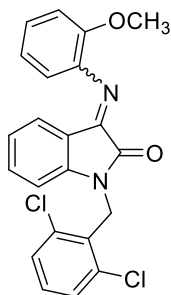

obtained from **1c** (1.62 mmol, 495 mg). Orange solid, yield: 400 mg, 60%; m.p. 190-192 °C; two diastereomers *E/Z* 80:20; <sup>1</sup>H NMR (500 MHz, CDCl<sub>3</sub>) (*E*)-**6d** δ 3.73 (s, 3H), 5.33 (s, 2H), 6.65 (d, *J* = 8.0 Hz, 1H), 6.67-6.71 (m, 2H), 6.97-7.02 (m, 3H), 7.15-7.23 (m, 3H), 7.35 (d, *J* = 8.1 Hz, 2H); (*Z*)-**6d** δ 3.77 (s, 3H), 5.14 (s, 2H), 6.62 (d, *J* = 8.0 Hz, 1H), 6.93 (d, *J* = 8.2 Hz, 1H), 6.97-7.02 (m, 2H), 7.04 (t, *J* = 7.6 Hz, 1H), 7.13 (m, 1H), 7.15-7.23 (m, 2H), 7.28 (d, *J* = 7.8 Hz, 1H), 7.33 (m, 1H), 7.78 (d, *J* = 7.4 Hz, 1H); <sup>13</sup>C NMR (126 MHz, CDCl<sub>3</sub>) δ 39.6, 40.1, 55.5, 55.7, 109.6, 110.1, 111.0, 111.8, 116.8, 119.3, 119.9, 120.5, 121.0, 121.5, 122.5, 122.8, 123.1, 125.6, 125.9, 126.2, 128.9, 129.0, 129.8, 129.9, 133.5, 133.7, 136.2, 136.3, 139.2, 146.5, 148.0, 154.6, 162.7; IR (neat) ν 1729, 1605, 1457, 1430, 1249, 741 cm<sup>-1</sup>; HRMS (ESI-TOF) calcd for C<sub>22</sub>H<sub>17</sub>Cl<sub>2</sub>N<sub>2</sub>O<sub>2</sub> [M+H]<sup>+</sup> 411.0662, found. 411.0672.

**1-(2,6-Dichlorobenzyl)-3-(*o*-tolylimino)indolin-2-one (6e).** This compound was obtained from

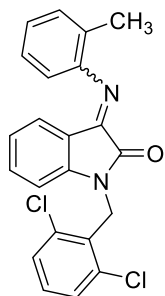

**1c** (1.6 mmol, 490 mg). Yellow solid, yield: 297 mg, 47%; m.p. 164-166 °C; two diastereomers *E/Z* 90:10; <sup>1</sup>H NMR (500 MHz, CDCl<sub>3</sub>) (*E*)-**6e** δ 2.12 (s, 3H), 5.34 (s, 2H), 6.45 (d, *J* = 7.0 Hz, 1H), 6.67 (d, *J* = 7.3 Hz, 2H), 6.83 (d, *J* = 7.7 Hz, 1H), 7.14 (t, *J* = 7.2 Hz, 1H), 7.17 (t, *J* = 7.4 Hz, 1H), 7.22 (d, *J* = 8.1 Hz, 2H), 7.26 (t, *J* = 8.4 Hz, 1H), 7.36 (d, *J* = 8.0 Hz, 2H); (*Z*)-**6e** δ 2.18 (s, 3H), 5.16 (s, 2H), 6.64 (d, *J* = 8.1 Hz, 1H), 6.69 (m, 1H), 7.04-7.12 (m, 2H), 7.19-7.26 (m, 5H), 7.33 (m, 1H), 7.75 (d, *J* = 7.3 Hz, 1H); <sup>13</sup>C NMR (126 MHz, CDCl<sub>3</sub>) δ 17.6, 40.1, 110.3, 116.3, 116.6, 117.1, 122.6, 122.9, 123.0, 125.0, 125.7, 125.8, 126.7, 129.0, 129.7, 129.9, 130.2, 130.8, 133.6, 133.9,



136.2, 136.3, 146.5, 149.3, 153.9, 162.7; IR (neat)  $\nu$  1736, 1642, 1598, 1470, 1353, 762, 731  $\text{cm}^{-1}$ ; HRMS (ESI-TOF) calcd for  $\text{C}_{22}\text{H}_{17}\text{Cl}_2\text{N}_2\text{O}$   $[\text{M}+\text{H}]^+$  395.0712, found 395.0713.

**1-(2,6-Dichlorobenzyl)-3-(mesitylimino)indolin-2-one (6f).** This compound was obtained from

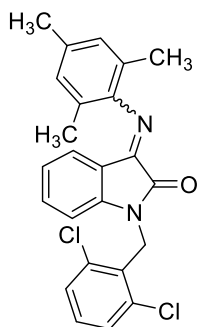

**1c** (1.61 mmol, 492 mg). Orange solid, yield: 395 mg, 58%; m.p. 201-204 °C; two diastereomers *E/Z* 95:5;  $^1\text{H}$  NMR (500 MHz,  $\text{CDCl}_3$ ) (*E*)-**6f**  $\delta$  1.99 (s, 6H), 2.32 (s, 3H), 5.35 (s, 2H), 6.39 (d,  $J = 7.2$  Hz, 1H), 6.63 (d,  $J = 8.0$  Hz, 1H), 6.69 (t,  $J = 7.6$  Hz, 1H), 6.91 (s, 2H), 7.16 (td,  $J = 7.8, 1.1$  Hz, 1H), 7.22 (t,  $J = 8.0$  Hz, 1H), 7.35 (d,  $J = 8.1$  Hz, 2H); (*Z*)-**6f**  $\delta$  2.02 (s, 6H), 2.28 (s, 3H), 5.15 (s, 2H), 6.73 (d,  $J = 8.1$  Hz, 1H), 6.88 (m, 3H), 7.04-7.09 (m, 3H), 7.43 (t,  $J = 8.5$  Hz, 1H), 7.59 (d,  $J = 7.4$  Hz, 1H);  $^{13}\text{C}$  NMR (126 MHz,  $\text{CDCl}_3$ )  $\delta$  17.7, 17.9, 18.4, 20.8, 40.0,

110.1, 116.8, 123.0, 123.9, 125.0, 128.5, 129.0, 129.1, 129.7, 129.9, 133.6, 133.8, 136.2, 145.7, 145.9, 154.6, 162.7; IR (neat)  $\nu$  1732, 1648, 1601, 1467, 1440, 1348, 751  $\text{cm}^{-1}$ ; HRMS (ESI-TOF) calcd for  $\text{C}_{24}\text{H}_{21}\text{Cl}_2\text{N}_2\text{O}$   $[\text{M}+\text{H}]^+$  423.1025, found. 423.1033.

**1-(2,6-Dichlorobenzyl)-3-((3,5-dichlorophenyl)imino)indolin-2-one (6g).** This compound was

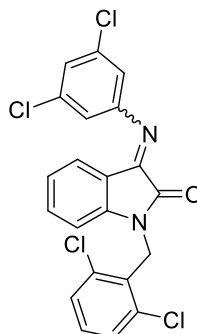

obtained from **1c** (1.3 mmol, 398 mg). Yellow solid, yield: 468 mg, 80%; m.p. 190-193 °C; two diastereomers *E/Z* 80:20;  $^1\text{H}$  NMR (500 MHz,  $\text{CDCl}_3$ ) (*E*)-**6g**  $\delta$  5.31 (s, 2H), 6.66 (d,  $J = 7.6$  Hz, 1H), 6.71 (d,  $J = 8.0$  Hz, 1H), 6.77 (t,  $J = 7.6$  Hz, 1H), 6.91 (s, 2H), 7.22-7.26 (m, 3H), 7.37 (d,  $J = 7.9$  Hz, 2H); (*Z*)-**6g**  $\delta$  5.15 (s, 2H), 6.87 (s, 2H), 7.06 (t,  $J = 7.5$  Hz, 1H), 7.14 (s, 1H), 7.22-7.26 (m, 3H), 7.31 (d,  $J = 8.1$  Hz, 1H), 7.35 (d,  $J = 7.3$  Hz, 1H), 7.66 (d,  $J = 7.4$  Hz, 1H);  $^{13}\text{C}$  NMR (126 MHz,  $\text{CDCl}_3$ )  $\delta$  39.8, 40.2, 110.1, 110.7, 115.3, 116.3, 117.2, 122.8, 123.2,

123.4, 124.5, 124.9, 126.3, 129.0, 129.4, 130.0, 130.1, 134.5, 134.8, 134.9, 135.8, 136.2, 136.3, 147.2, 151.1, 152.0, 155.0, 156.7, 162.2; IR (neat)  $\nu$  1726, 1655, 1558, 1467, 1343, 748, 667  $\text{cm}^{-1}$ ; HRMS (ESI-TOF) calcd for  $\text{C}_{21}\text{H}_{13}\text{Cl}_4\text{N}_2\text{O}$   $[\text{M}+\text{H}]^+$  448.9777, found 448.9775.

**1-Benzyl-3-((3,5-dichlorophenyl)imino)indolin-2-one (6h).** This compound was obtained from

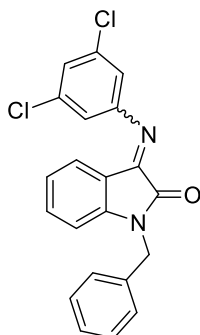

**1b** (1.3 mmol, 308 mg). Yellow solid, yield: 273 mg, 55%; m.p. 124-127 °C; two diastereomers *E/Z* 80:20;  $^1\text{H}$  NMR (500 MHz,  $\text{CDCl}_3$ ) (*E*)-**6h**  $\delta$  5.00 (s, 2H), 6.68 (dd,  $J = 7.7, 0.6$  Hz, 1H), 6.77 (d,  $J = 8.0$  Hz, 1H), 6.81 (td,  $J = 7.7, 0.8$  Hz, 1H), 6.93 (d,  $J = 1.8$  Hz, 2H), 7.24 (t,  $J = 1.8$  Hz, 1H), 7.28-7.40 (m, 6H); (*Z*)-**6h**  $\delta$  4.84 (s, 2H), 6.75 (d,  $J = 8.8$  Hz, 1H), 6.90 (d,  $J = 1.8$  Hz, 2H), 7.10 (t,  $J = 7.6$  Hz, 1H), 7.14 (t,  $J = 1.8$  Hz, 1H), 7.28-7.40 (m, 2H), 7.47 (dd,  $J = 7.1, 2.3$  Hz, 2H), 7.54 (dd,  $J = 7.5, 1.6$  Hz, 1H), 7.66 (d,  $J = 7.0$  Hz, 1H), 7.69 (d,  $J = 8.1$  Hz, 1H);  $^{13}\text{C}$  NMR (126 MHz,  $\text{CDCl}_3$ )  $\delta$  43.7, 44.0, 109.9, 110.6, 115.2, 116.3, 117.2, 120.7,

123.0, 123.4, 123.5, 124.5, 125.0, 126.4, 127.4, 127.5, 127.9, 128.0, 128.4, 128.5, 128.9, 128.9, 131.9, 132.0, 132.1, 134.5, 134.7, 134.8, 134.9, 135.9, 146.3, 147.5, 151.0, 152.0, 155.4, 157.1, 162.7; IR (neat)  $\nu$  1729, 1658, 1554, 1356, 1101, 923, 802, 698, 667  $\text{cm}^{-1}$ ; HRMS (ESI-TOF): calcd for  $\text{C}_{21}\text{H}_{15}\text{Cl}_2\text{N}_2\text{O}$   $[\text{M}+\text{H}]^+$ : 381.0556, found: 381.0567.

**3-((3,5-Dichlorophenyl)imino)-1-methylindolin-2-one (6i).** This compound was obtained from

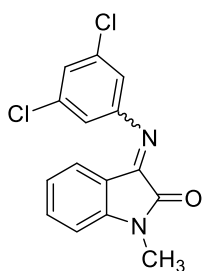

**1a** (1.3 mmol, 210 mg) Orange solid, yield: 243 mg, 61%; m. p. 191-193 °C; two diastereomers *E/Z* 80:20;  $^1\text{H}$  NMR (500 MHz,  $\text{CDCl}_3$ ) (*E*)-**6i**  $\delta$  3.30 (s, 3H), 6.67 (d,  $J$  = 8.3 Hz, 1H), 6.85 (m, 2H), 6.87-6.89 (m, 2H), 7.23 (t,  $J$  = 1.8 Hz, 1H), 7.42 (td,  $J_1$  = 7.8 Hz,  $J_2$  = 1.2 Hz, 1H); (*Z*)-**6i**  $\delta$  3.16 (s, 3H), 6.83-6.89 (m, 3H), 7.12 (t,  $J$  = 1.8 Hz, 1H), 7.14 (d,  $J$  = 7.6 Hz, 1H), 7.50 (td,  $J_1$  = 7.8 Hz,  $J_2$  = 1.3 Hz, 1H), 7.67 (d,  $J$  = 6.9 Hz, 1H);  $^{13}\text{C}$  NMR (126 MHz,  $\text{CDCl}_3$ )  $\delta$  25.9, 26.4,

108.9, 109.5, 115.0, 116.3, 117.0, 120.5, 123.0, 123.4, 124.4, 124.9, 126.3, 128.4, 131.8, 132.0, 134.6, 134.8, 135.0, 135.8, 138.3, 147.0, 148.3, 151.2, 152.0, 155.5, 162.6; IR (neat)  $\nu$  1726, 1655, 1558, 1376, 1101, 926, 795, 762  $\text{cm}^{-1}$ ; HRMS (ESI-TOF) calcd for  $\text{C}_{15}\text{H}_{11}\text{Cl}_2\text{N}_2\text{O}$   $[\text{M}+\text{H}]^+$  305.0243, found 305.0257.

**3-((3,5-Dichlorophenyl)imino)-1-(methoxymethyl)indolin-2-one (6j).** This compound was

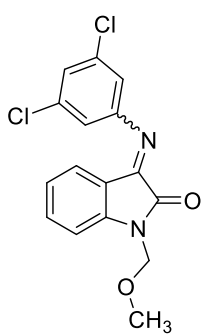

obtained from **1n** (1.31 mmol, 250 mg). Orange solid, yield: 290 mg, 66%; m.p. 156-158 °C; two diastereomers *E/Z* 80:20;  $^1\text{H}$  NMR (500 MHz,  $\text{CDCl}_3$ ) (*E*)-**6j**  $\delta$  3.41 (s, 3H), 5.22 (s, 2H), 6.72 (d,  $J$  = 7.7 Hz, 1H), 6.88-6.92 (3H), 7.10 (d,  $J$  = 8.0 Hz, 1H), 7.24 (t,  $J$  = 1.8 Hz, 1H), 7.43 (td,  $J_1$  = 7.8 Hz,  $J_2$  = 1.2 Hz, 1H); (*Z*)-**6j**  $\delta$  3.33 (s, 3H), 5.06 (s, 2H), 6.86 (d,  $J$  = 1.8 Hz, 2H), 7.06 (d,  $J$  = 7.9 Hz, 1H), 7.14 (t,  $J$  = 1.8 Hz, 1H), 7.18 (t,  $J$  = 7.2 Hz, 1H), 7.51 (td,  $J_1$  = 7.8 Hz,  $J_2$  = 1.2 Hz, 1H), 7.72 (d,  $J$  = 1.5 Hz, 1H);  $^{13}\text{C}$  NMR (126 MHz,  $\text{CDCl}_3$ )  $\delta$  56.6, 56.7,

71.4, 71.6, 110.4, 111.2, 115.1, 116.2, 117.0, 118.8, 120.4, 123.5, 123.6, 123.9, 124.5, 125.0, 126.3, 128.4, 132.0, 134.8, 134.9, 135.2, 135.9, 145.5, 146.8, 151.0, 151.9, 153.0, 155.2, 157.3, 162.4, 163.0; IR (neat)  $\nu$  1736, 1658, 1558, 1353, 1067, 802, 758  $\text{cm}^{-1}$ ; HRMS (ESI-TOF) calcd for  $\text{C}_{16}\text{H}_{13}\text{Cl}_2\text{N}_2\text{O}_2$   $[\text{M}+\text{H}]^+$  335.0349, found 335.0355.

**3-((3,5-Dichlorophenyl)imino)-1-tritylindolin-2-one (6k).** This compound was obtained from **1d**

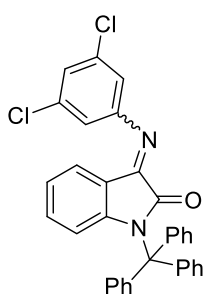

(1.3 mmol, 505 mg). Orange solid, yield: 485 mg, 70%; m.p. 260-262 °C; two diastereomers *E/Z* 80:20;  $^1\text{H}$  NMR (500 MHz,  $\text{CDCl}_3$ ) (*E*)-**6k**  $\delta$  6.38 (d,  $J$  = 8.3 Hz, 1H), 6.66 (dd,  $J$  = 7.7, 1.2 Hz, 1H), 6.71 (t,  $J$  = 7.6 Hz, 1H), 6.92 (d,  $J$  = 1.8 Hz, 1H), 7.02 (m, 1H), 7.19-7.30 (m, 11H), 7.44 (d,  $J$  = 7.5 Hz, 1H), 7.48-7.50 (m, 5H); (*Z*)-**6k**  $\delta$  6.29 (d,  $J$  = 8.2 Hz, 1H), 6.80 (d,  $J$  = 1.8 Hz, 1H), 6.92 (d,  $J$  =

1.8 Hz, 2H), 6.99-7.04 (m, 2H), 7.11 (t,  $J = 8.6$  Hz, 1H), 7.19-7.30 (m, 7H), 7.44 (d,  $J = 7.5$  Hz, 2H), 7.48-7.50 (m, 5H), 7.64 (d,  $J = 8.4$  Hz, 1H);  $^{13}\text{C}$  NMR (126 MHz,  $\text{CDCl}_3$ )  $\delta$  75.1, 116.2, 116.3, 117.2, 117.3, 122.3, 124.6, 125.6, 127.0, 127.1, 127.8, 127.9, 129.0, 129.2, 133.2, 134.8, 135.8, 141.3, 148.6, 152.3, 155.1, 163.5; IR (neat)  $\nu$  1736, 1672, 1558, 1454, 692  $\text{cm}^{-1}$ ; HRMS (ESI-TOF) calcd for  $\text{C}_{33}\text{H}_{23}\text{Cl}_2\text{N}_2\text{O}$   $[\text{M}+\text{H}]^+$  533.1182, found 533.1197.

**1-Acetyl-3-((3,5-dichlorophenyl)imino)indolin-2-one (6l).** This compound was obtained from **1e**

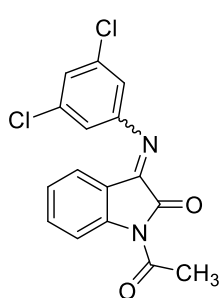

(1.3 mmol, 245 mg). Orange solid, yield: 246 mg, 57%; m.p. 191-193 °C; two diastereomers *E/Z* 75:25;  $^1\text{H}$  NMR (500 MHz,  $\text{CDCl}_3$ ) (*E*)-**6l**  $\delta$  2.79 (s, 3H), 6.85 (d,  $J = 8.6$  Hz, 1H), 6.89 (d,  $J = 1.8$  Hz, 2H), 7.04 (t,  $J = 7.7$  Hz, 1H), 7.26 (t,  $J = 1.7$  Hz, 1H), 7.52 (t,  $J = 8.6$  Hz, 1H), 8.41 (d,  $J = 8.3$  Hz, 1H); (*Z*)-**6l**  $\delta$  2.61 (s, 3H), 6.83 (d,  $J = 1.8$  Hz, 2H), 7.16 (t,  $J = 1.8$  Hz, 1H), 7.33 (t,  $J = 7.5$  Hz, 1H), 7.59 (t,  $J = 8.6$  Hz, 1H), 7.81 (d,  $J = 7.5$  Hz, 1H), 8.31 (d,  $J = 8.3$  Hz, 1H);  $^{13}\text{C}$  NMR (126 MHz,  $\text{CDCl}_3$ )  $\delta$  26.6, 26.8, 115.9, 116.4, 116.5, 117.3, 117.9, 123.2, 124.6, 125.2, 125.4, 125.8, 125.9, 135.1, 135.2, 135.4, 136.1, 143.9, 144.9, 151.0, 151.5, 153.5, 162.5, 170.0, 170.1; IR (neat)  $\nu$  1769, 1702, 1558, 1276, 795, 762  $\text{cm}^{-1}$ ; HRMS (ESI-TOF) calcd for  $\text{C}_{16}\text{H}_{10}\text{Cl}_2\text{N}_2\text{NaO}_2$   $[\text{M}+\text{H}]^+$  355.0012, found 355.0019.

**3-((3,5-Dichlorophenyl)imino)indolin-2-one (6m).** This compound was obtained from **1o** (1.3

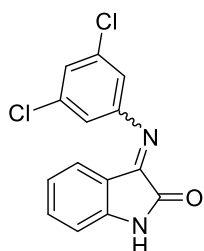

mmol, 190 mg). Orange solid, yield: 285, mg, 76%; m.p. 221-223 °C; two diastereomers *E/Z* 75:25;  $^1\text{H}$  NMR (500 MHz,  $\text{DMSO}-d_6$ ) (*E*)-**6m**  $\delta$  6.40 (d,  $J = 7.2$  Hz, 1H), 6.80 (td,  $J = 7.7, 0.9$  Hz, 1H), 6.90 (d,  $J = 7.8$  Hz, 1H), 7.05 (m, 1H), 7.12 (d,  $J = 1.9$  Hz, 1H), 7.37 (td,  $J_1 = 7.7\text{Hz}, J_2 = 1.2$  Hz, 1H), 7.46 (m, 1H), 11.0 (s broad, 1H); (*Z*)-**6m**  $\delta$  6.86 (d,  $J = 7.8$  Hz, 1H), 7.05 (m, 1H), 7.12 (d,  $J = 1.9$  Hz, 1H), 7.25 (td,  $J_1 = 1.9$  Hz, 1H), 7.46 (m, 1H), 7.52-7.62 (2H), 10.9 (s broad, 1H);  $^{13}\text{C}$  NMR (126 MHz,  $\text{DMSO}-d_6$ )  $\delta$  111.4, 112.2, 115.9, 116.7, 117.7, 121.1, 122.5, 122.8, 123.4, 123.8, 124.5, 126.0, 129.1, 129.2, 131.8, 131.9, 134.1, 135.4, 135.5, 135.6, 146.7, 147.7, 152.5, 153.3, 155.1, 156.6, 158.9, 163.5; IR (neat)  $\nu$  1709, 1611, 1561, 795, 661  $\text{cm}^{-1}$ ; HRMS (ESI-TOF) calcd for  $\text{C}_{14}\text{H}_9\text{Cl}_2\text{N}_2\text{O}$   $[\text{M}+\text{H}]^+$  291.0086, found 291.0093.

**1-(2,6-Dichlorobenzyl)-3-((3,5-dichlorophenyl)imino)-5-fluoroindolin-2-one (6n).** This

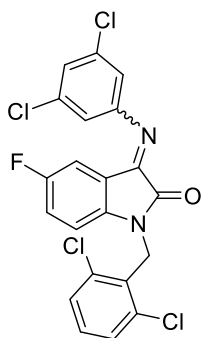

compound was obtained from **1g** (1.3 mmol, 420 mg). Yellow solid, yield: 340 mg, 56%; m.p. 205-207 °C; two diastereomers *E/Z* 70:30; <sup>1</sup>H NMR (500 MHz, CDCl<sub>3</sub>) (*E*)-**6n** δ 5.31 (s, 2H), 6.38 (dd, *J*<sub>1</sub> = 7.7 Hz, *J*<sub>2</sub> = 2.6 Hz, 1H), 6.66 (dd, *J*<sub>1</sub> = 8.8 Hz, *J*<sub>2</sub> = 4.0 Hz, 1H), 6.90 (m, 2H), 6.98 (td, *J*<sub>1</sub> = 8.7 Hz, *J*<sub>2</sub> = 2.7 Hz, 1H), 7.25 (m, 2H), 7.37 (m, 2H); (*Z*)-**6n** δ 5.15 (s, 2H), 6.60 (dd, *J*<sub>1</sub> = 8.7, *J*<sub>2</sub> = 3.8 Hz, 1H), 6.90 (m, 2H), 7.03 (td, *J*<sub>1</sub> = 8.8, *J*<sub>2</sub> = 2.7 Hz, 1H), 7.16 (t, *J* = 1.8 Hz, 1H), 7.25 (m, 2H), 7.37 (m, 2H); <sup>13</sup>C NMR (126 MHz, CDCl<sub>3</sub>) δ 39.9, 40.3, 110.9 (d, *J* = 25.1 Hz), 111.1 (d, *J* = 7.6 Hz), 111.7 (d, *J* = 7.6 Hz), 113.7 (d, *J* = 26.9 Hz), 115.7 (d, *J* = 8.1 Hz), 116.0, 117.3, 120.8 (d, *J* = 24.1 Hz), 121.4 (d, *J* = 23.9 Hz), 124.9, 125.3, 129.1, 129.3, 130.2, 130.3, 134.9, 136.0, 136.2, 136.3, 141.9 (d, *J* = 1.9 Hz), 143.4 (d, *J* = 2.0 Hz), 150.5, 151.4, 152.5 (d, *J* = 2.9 Hz), 154.4 (d, *J* = 2.5 Hz), 156.6, 157.1, 159.0, 159.2 (d, *J* = 243.8 Hz), 159.6 (d, *J* = 243.7 Hz), 162.1; <sup>19</sup>F NMR (470 MHz, CDCl<sub>3</sub>) (*E*)-**6n** δ -118.5; (*Z*)-**6n** δ -119.0; IR (neat) ν 1730, 1666, 1559, 1479, 1328, 818, 768 cm<sup>-1</sup>; HRMS (ESI-TOF) calcd for C<sub>21</sub>H<sub>12</sub>Cl<sub>4</sub>FN<sub>2</sub>O [M+H]<sup>+</sup>: 466.9682, found 466.9692.

**5-Chloro-1-(2,6-dichlorobenzyl)-3-((3,5-dichlorophenyl)imino)indolin-2-one (6o).** This

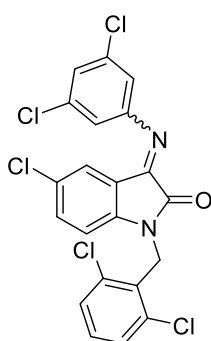

compound was obtained from **1h** (1.31 mmol, 445 mg) Yellow solid, yield: 538 mg, 85%; m.p. 199-200 °C; two diastereomers *E/Z* 65:35; <sup>1</sup>H NMR (500 MHz, CDCl<sub>3</sub>) (*E*)-**6o** δ 5.31 (s, 2H), 6.65 (dd, *J*<sub>1</sub> = 7.4 Hz, *J*<sub>2</sub> = 3.5 Hz, 2H), 6.90 (m, 2H), 7.22-7.29 (m, 3H), 7.37 (t, *J* = 7.6 Hz, 2H); (*Z*)-**6o** δ 5.15 (s, 2H), 6.60 (d, *J* = 8.5 Hz, 1H), 6.90 (m, 2H), 7.16 (s, 1H), 7.22-7.29 (m, 2H), 7.46 (td, *J*<sub>1</sub> = 7.5 Hz, *J*<sub>2</sub> = 2.7 Hz, 2H), 7.54 (m, 1H); <sup>13</sup>C NMR (126 MHz, CDCl<sub>3</sub>) δ 39.9, 40.3, 111.2, 111.8, 116.1, 116.2, 117.3, 122.2, 123.5, 124.9, 125.4, 126.1, 128.2, 128.4, 128.5, 129.0, 129.1, 129.2, 130.2, 130.3, 131.8, 131.9, 132.0, 132.1, 132.1, 132.9, 134.0, 134.5, 134.9, 136.0, 136.2, 136.3, 144.1, 145.6, 150.5, 151.3, 152.0, 153.8, 156.3, 161.8; IR (neat) ν 1730, 1676, 1559, 1472, 1435, 670 cm<sup>-1</sup>; HRMS (ESI-TOF): calcd for C<sub>21</sub>H<sub>12</sub>Cl<sub>5</sub>N<sub>2</sub>O [M+H]<sup>+</sup> 482.9387, found 482.9398.

**5-Bromo-1-(2,6-dichlorobenzyl)indoline-2,3-dione (6p).** This compound was obtained from **1i**

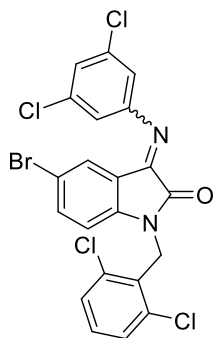

(1.31 mmol, 445 mg) Orange solid, yield: 502 mg, 73%; m.p. 171-173 °C; two diastereomers *E/Z* 65:35; <sup>1</sup>H NMR (500 MHz, CDCl<sub>3</sub>): (*E*)-**6p** δ 5.30 (s, 2H), 6.61 (d, *J* = 8.5 Hz, 1H), 6.91 (d, *J* = 1.9 Hz, 2H), 7.23-7.27 (m, 2H), 7.36 (m, 4H); (*Z*)-**6p** δ 5.14 (s, 2H), 6.55 (d, *J* = 8.4 Hz, 1H), 6.79 (d, *J* = 2.0 Hz, 2H), 6.88 (d, *J* = 1.8 Hz, 2H), 7.16 (t, *J* = 1.8 Hz, 1H), 7.25 (m, 1H), 7.43 (dd, *J*<sub>1</sub> = 8.4 Hz, *J*<sub>2</sub> = 2.1 Hz, 1H), 7.78 (d, *J* = 2.0 Hz, 1H). <sup>13</sup>C NMR (126 MHz, CDCl<sub>3</sub>) δ 39.9, 40.3, 111.7, 112.2, 115.3, 116.2, 116.3, 116.6, 117.3, 122.5, 125.0, 125.4, 126.4, 129.0, 129.0, 129.1, 129.2, 130.3, 130.3, 134.9, 136.0, 136.2, 136.3, 136.9, 137.4, 144.6, 146.0, 150.4, 151.2, 151.8, 153.7, 156.2, 161.7; IR (neat) ν 1727, 1562, 1472, 1422, 808, 774, 677 cm<sup>-1</sup>; HRMS (ESI-TOF) calcd for C<sub>21</sub>H<sub>12</sub>BrCl<sub>4</sub>N<sub>2</sub>O [M+H]<sup>+</sup>: 526.8882, found 526.8901.

**1-(2,6-Dichlorobenzyl)-3-((3,5-dichlorophenyl)imino)-5-methylindolin-2-one (6q).** This

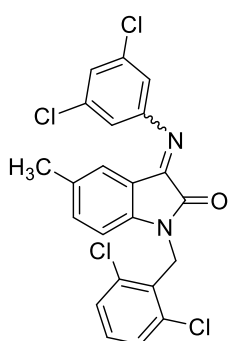

compound was obtained from **1j** (1.3 mmol, 415 mg) Orange solid, yield: 530 mg, 88%; m.p. 194-195 °C. (from EtOH); two diastereomers *E/Z* 75:25; <sup>1</sup>H NMR (500 MHz, CDCl<sub>3</sub>) (*E*)-**6q** δ 2.07 (s, 3H), 5.29 (s, 2H), 6.46 (s, 1H), 6.59 (d, *J* = 8.1 Hz, 1H), 6.92 (d, *J* = 1.7 Hz, 2H), 7.05 (d, *J* = 8.0 Hz, 1H), 7.20-7.24 (2H), 7.36 (d, *J* = 8.0 Hz, 2H); (*Z*)-**6q** δ 2.29 (s, 3H), 5.12 (s, 2H), 6.54 (d, *J* = 8.1 Hz, 1H), 6.86 (d, *J* = 1.7 Hz, 2H), 7.12 (d, *J* = 8.3 Hz, 2H), 7.20-7.24 (m, 1H), 7.34 (d, *J* = 6.9 Hz, 2H), 7.48 (s, 1H); <sup>13</sup>C NMR (126 MHz, CDCl<sub>3</sub>) δ 20.7, 20.8, 39.8, 40.2, 109.9, 110.5, 115.3, 116.4, 117.2, 120.8, 123.9, 124.4, 124.8, 126.8, 129.0, 129.5, 129.7, 130.0, 132.3, 132.9, 134.8, 135.0, 135.3, 135.7, 136.2, 136.3, 143.6, 145.0, 151.2, 152.0, 153.2, 155.1, 162.3; IR (neat) ν 1732, 1564, 1484, 1333, 798 cm<sup>-1</sup>; HRMS (ESI-TOF) calcd for C<sub>22</sub>H<sub>15</sub>Cl<sub>4</sub>N<sub>2</sub>O [M+H]<sup>+</sup> 462.9933, found 462.9948.

**1-(2,6-Dichlorobenzyl)-3-((3,5-dichlorophenyl)imino)-5-methoxyindolin-2-one (6r).** This

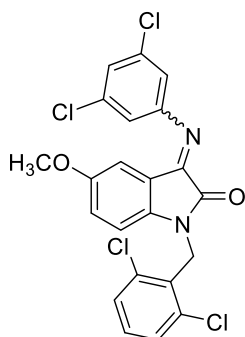

compound was obtained from **1k** (1.3 mmol, 437 mg) Red solid, yield: 363 mg 58%; m.p. 179-182 °C; two diastereomers *E/Z* 75:25; <sup>1</sup>H NMR (500 MHz, CDCl<sub>3</sub>) (*E*)-**6r** δ 3.51 (s, 3H), 5.28 (s, 2H), 6.22 (d, *J* = 2.6 Hz, 1H), 6.60 (d, *J* = 8.7 Hz, 1H), 6.79 (dd, *J*<sub>1</sub> = 8.7 Hz, *J*<sub>2</sub> = 2.7 Hz, 1H), 6.88 (d, *J* = 1.9 Hz, 1H), 6.93 (d, *J* = 1.8 Hz, 1H), 7.21-7.25 (m, 2H), 7.36 (d, *J* = 8.0 Hz, 2H); (*Z*)-**6r** δ 3.78 (s, 3H), 5.12 (s, 2H), 6.56 (d, *J* = 8.6 Hz, 1H), 6.86 (d, *J* = 2.7 Hz, 2H), 6.93 (d, *J* = 1.8 Hz, 1H), 7.14 (t, *J* = 1.8 Hz, 1H), 7.21-7.25 (m, 2H), 7.35 (d, *J* = 6.5 Hz, 2H); <sup>13</sup>C NMR (126 MHz, CDCl<sub>3</sub>) δ 39.8, 40.2, 55.4, 55.8, 108.2, 111.0, 111.4, 112.0, 115.8, 116.4, 117.2, 120.3, 120.8, 124.6, 124.9, 129.0, 129.5, 130.0, 135.8, 136.2, 136.3, 139.6,

140.9, 151.0, 151.8, 153.3, 155.1, 155.3, 156.1, 156.9, 162.3; IR (neat)  $\nu$  1726, 1561, 1487, 1027, 795, 770  $\text{cm}^{-1}$ ; HRMS (ESI-TOF) calcd for  $\text{C}_{22}\text{H}_{15}\text{Cl}_4\text{N}_2\text{O}_2$   $[\text{M}+\text{H}]^+$  478.9882, found 478.9897.

**1-(2,6-Dichlorobenzyl)-3-((3,5-dichlorophenyl)imino)-5-nitroindolin-2-one (6s).** This

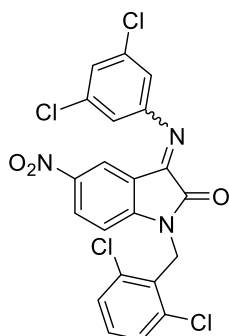

compound was obtained from **1l** (1.3 mmol, 455 mg) orange solid, yield: 520 mg, 81%, m.p. 144-146 °C; two diastereomers *E/Z* 55:45;  $^1\text{H}$  NMR (500 MHz,  $\text{CDCl}_3$ ) (*E*)-**6s**  $\delta$  5.39 (s, 2H), 6.84 (d,  $J$  = 8.8 Hz, 1H), 6.94 (t,  $J$  = 1.8 Hz, 3H), 7.28 (m, 1H), 7.38-7.41 (m, 3H), 8.21 (dd,  $J_1$  = 8.8 Hz,  $J_2$  = 2.3 Hz, 1H), (*Z*)-**6s**  $\delta$  5.23 (s, 2H), 6.79 (d,  $J$  = 8.8 Hz, 1H), 7.21 (t,  $J$  = 1.8 Hz, 1H), 7.28 (m, 2H), 7.34 (t,  $J$  = 1.8 Hz, 1H), 7.40 (m, 1H), 7.58 (d,  $J$  = 2.3 Hz, 1H), 8.28 (dd,  $J_1$  = 8.8 Hz,  $J_2$  = 2.4 Hz, 1H), 8.54 (d,  $J$  = 2.3 Hz, 1H);  $^{13}\text{C}$  NMR (126 MHz,  $\text{CDCl}_3$ )  $\delta$  40.2, 40.6, 110.0, 110.6, 114.9, 116.0, 117.6, 119.1, 121.3, 121.6, 125.6, 126.0, 128.5, 128.6, 129.2, 130.1, 130.5, 130.6, 130.7, 135.0, 136.2, 136.2, 136.3, 143.0, 143.9, 149.8, 150.0, 150.7, 150.8, 151.5, 152.9, 156.4, 162.0; IR (neat)  $\nu$  1757, 1740, 1673, 1606, 1559, 1338, 1318, 791  $\text{cm}^{-1}$ ; HRMS (ESI-TOF) calcd for  $\text{C}_{21}\text{H}_{12}\text{Cl}_4\text{N}_3\text{O}_3$   $[\text{M}+\text{H}]^+$  493.9627, found. 493.9642

**1-(2,6-Dichlorobenzyl)-3-((3,5-dichlorophenyl)imino)-7-methylindolin-2-one (6t).** This

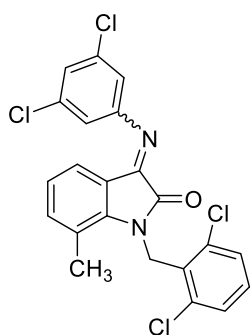

compound was obtained from **1m** (1.3 mmol, 416 mg) Yellow solid, yield: 500 mg, 83%, two diastereomers *E/Z* 70:30; m.p. 172-174 °C;  $^1\text{H}$  NMR (500 MHz,  $\text{CDCl}_3$ ) (*E*)-**6t**  $\delta$  2.38 (s, 3H), 5.50 (s, 2H), 6.58 (d,  $J$  = 7.6 Hz, 1H), 6.73 (td,  $J$  = 7.7, 0.9 Hz, 1H), 6.86 (dd,  $J_1$  = 1.9 Hz,  $J_2$  = 0.9 Hz, 2H), 7.10 (m, 1H), 7.14-7.20 (m, 2H), 7.32 (d,  $J$  = 8.5 Hz, 2H); (*Z*)-**6t**  $\delta$  2.34 (s, 3H), 5.35 (s, 2H), 6.82 (dd,  $J_1$  = 1.9 Hz,  $J_2$  = 0.9 Hz, 2H), 7.02 (t,  $J$  = 7.6 Hz, 1H), 7.09 (m, 1H), 7.14-7.20 (m, 1H), 7.26-7.30 (m, 3H), 7.58 (d,  $J$  = 7.4 Hz, 1H);  $^{13}\text{C}$  NMR (126 MHz,  $\text{CDCl}_3$ )  $\delta$  18.9, 19.4, 42.7, 43.3, 116.0, 116.3, 117.3, 120.7, 121.5, 121.6, 121.9, 122.9, 123.4, 124.4, 124.6, 124.7, 129.1, 129.2, 131.0, 134.7, 134.9, 135.3, 135.8, 138.6, 139.0, 144.7, 146.2, 151.2, 152.2, 152.9, 154.8, 164.0; IR (neat)  $\nu$  1728, 1655, 1558, 1442, 1326, 1213, 1058, 851, 800, 731  $\text{cm}^{-1}$ ; HRMS (ESI-TOF) calcd for  $\text{C}_{22}\text{H}_{15}\text{Cl}_4\text{N}_2\text{O}$   $[\text{M}+\text{H}]^+$  462.9933, found 462.9936.

## 6. General procedure for the catalytic enantioselective alkylation of isatin-derived ketimines and characterization data of compounds **7a-k**, **8a-o** and **9a-m**.

To a solution 1.2 M of  $\text{ZnMe}_2$  in toluene (0.4 mmol, 0.33 mL) under nitrogen atmosphere, was added the corresponding alkyne (0.4 mmol) and the mixture was stirred at rt for 1 h. Then, a

solution 0.1 M of ligand **L2** in toluene (0.02 mmol, 0.20 mL) was added and the reaction stirred for another 30 min, whereupon a solution of the imine (0.1 mmol) in DCM (1 mL) was added dropwise and the reaction stirred at rt for 18 h. The reaction was quenched with NH<sub>4</sub>Cl, extracted with DCM, dried over MgSO<sub>4</sub>, filtered and concentrated. Purification in column chromatography (hexane/DCM 3:1 to 1:2) afforded the pure product.

**(S)-1-(2,6-Dichlorobenzyl)-3-(phenylethynyl)-3-(phenylamino)indolin-2-one (7a).** This

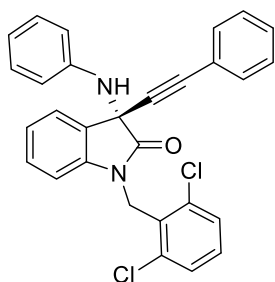

compound was obtained from **6a** (0.1 mmol, 38 mg). White solid, yield: 45 mg, 92%; m.p. 203-204 °C;  $[\alpha]_D^{25} = +132.5$  (*c* 0.8, CH<sub>2</sub>Cl<sub>2</sub>, 98% ee); <sup>1</sup>H NMR (500 MHz, CDCl<sub>3</sub>) δ 4.66 (s, 1H), 5.15 (d, *J* = 15.2 Hz, 1H), 5.40 (d, *J* = 15.2 Hz, 1H), 6.65 (d, *J* = 7.9 Hz, 2H), 6.79 (m, 2H), 7.04-7.12 (m, 3H), 7.21 (m, 2H), 7.26-7.32 (m, 3H), 7.34 (d, *J* = 8.1 Hz, 2H), 7.41 (dd, *J*<sub>1</sub> = 7.6 Hz, *J*<sub>2</sub> = 1.7 Hz, 2H), 7.52 (dd, *J*<sub>1</sub> = 8.0 Hz, *J*<sub>2</sub> = 0.6 Hz, 1H); <sup>13</sup>C NMR (126 MHz, CDCl<sub>3</sub>) δ 40.6, 59.3, 85.2, 85.7, 109.9, 116.8, 120.2, 121.9, 123.4, 124.5, 128.1, 12.87, 128.9, 129.0, 129.8, 129.9, 130.0, 131.9, 136.4, 141.5, 144.1, 172.6; IR (neat) ν 3368, 1716, 1601, 1487, 1433, 1343, 751, 688 cm<sup>-1</sup>; HRMS (ESI-TOF) calcd for C<sub>29</sub>H<sub>21</sub>Cl<sub>2</sub>N<sub>2</sub>O [M+H]<sup>+</sup> 483.1025, found 483.1036; HPLC: Phenomenex Lux Cellulose-1, hexane:2-propanol 60:40, 1 mL/min, λ = 254 nm, *t*<sub>R</sub> (major) = 8.5 min, *t*<sub>R</sub> (minor) = 13.1 min.

**(S)-1-(2,6-Dichlorobenzyl)-3-(phenylethynyl)-3-((4-(trifluoromethyl)phenyl)amino)indolin-2-one (7b).** This compound was obtained from **6b** (0.1 mmol, 46 mg). White solid, yield: 53 mg,

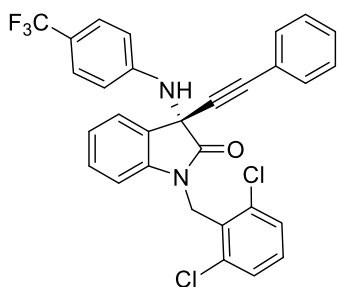

95%; m.p. 231-233 °C;  $[\alpha]_D^{25} = +53.1$  (*c* 0.6, CH<sub>2</sub>Cl<sub>2</sub>, 99% ee); <sup>1</sup>H NMR (500 MHz, CDCl<sub>3</sub>) δ 4.94 (s, 1H), 5.20 (d, *J* = 15.2 Hz, 1H), 5.40 (d, *J* = 15.2 Hz, 1H), 6.69 (d, *J* = 8.6 Hz, 2H), 6.81 (d, *J* = 7.9 Hz, 1H), 7.09 (td, *J*<sub>1</sub> = 7.6 Hz, *J*<sub>2</sub> = 0.6 Hz, 1H), 7.22 (m, 1H), 7.25 (m, 1H), 7.28-7.36 (m, 7H), 7.41 (dd, *J*<sub>1</sub> = 8.1 Hz, *J*<sub>2</sub> = 1.5 Hz, 2H), 7.51 (dd, *J* = 7.5, 1.0 Hz, 1H); <sup>13</sup>C NMR (126 MHz, CDCl<sub>3</sub>) δ 40.7, 58.6, 84.8, 85.8, 110.1, 114.9, 121.2 (q, *J* = 32.7 Hz), 123.6, 124.2, 126.3 (q, *J* = 3.8 Hz), 126.8 (q, *J* = 271.0 Hz), 128.3, 128.4, 128.9, 129.8, 130.0, 130.2, 131.9, 136.4, 141.4, 146.9, 172.0; <sup>19</sup>F NMR (470 MHz, CDCl<sub>3</sub>) δ -61.4; IR (neat) ν 3345, 1719, 1611, 1487, 1323, 1104, 1064, 758, 751 cm<sup>-1</sup>; HRMS (ESI-TOF) calcd for C<sub>30</sub>H<sub>20</sub>Cl<sub>2</sub>F<sub>3</sub>N<sub>2</sub>O [M+H]<sup>+</sup> 551.0899, found: 551.0906; HPLC: Phenomenex Lux Cellulose-1, hexane:2-propanol 60:40, 1 mL/min, λ = 254 nm, *t*<sub>R</sub> (major) = 6.4 min, *t*<sub>R</sub> (minor) = 16.1 min.

**(S)-1-(2,6-Dichlorobenzyl)-3-((4-methoxyphenyl)amino)-3-(phenylethynyl)indolin-2-one (7c).**

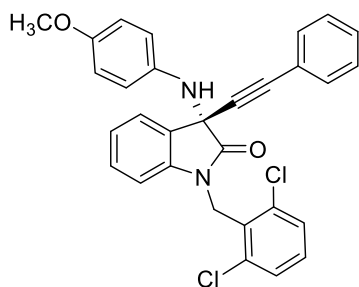

This compound was obtained from **6c** (0.1 mmol, 42 mg). White solid, yield: 37 mg, 71%; m.p. 194-195 °C;  $[\alpha]_D^{25} = +20.8$  (c 0.6, CH<sub>2</sub>Cl<sub>2</sub>, 99% ee); <sup>1</sup>H NMR (500 MHz, CDCl<sub>3</sub>) δ 3.73 (s, 3H), 4.33 (s, 1H), 5.11 (d, *J* = 15.2 Hz, 1H), 5.33 (d, *J* = 15.2 Hz, 1H), 6.68 (d, *J* = 9.0 Hz, 2H), 6.73 (m, 1H), 6.73 (d, *J* = 8.9 Hz, 2H), 7.05 (t, *J* = 7.5 Hz, 1H), 7.19 (t, *J* = 8.2 Hz, 2H), 7.26-7.30 (m, 3H), 7.33 (d, *J* = 8.0 Hz, 2H), 7.41 (dd, *J*<sub>1</sub> = 7.8 Hz, *J*<sub>2</sub> = 1.6 Hz, 2H), 7.47 (d, *J* = 7.9 Hz, 1H); <sup>13</sup>C NMR (126 MHz, CDCl<sub>3</sub>) δ 40.5, 55.4, 60.4, 85.3, 86.0, 109.8, 114.1, 121.9, 122.0, 123.1, 125.0, 128.1, 128.6, 128.9, 129.0, 129.7, 129.8, 130.0, 131.9, 136.4, 137.1, 141.8, 155.0, 172.9; IR (neat) ν 3331, 1729, 1608, 1511, 1228, 1168, 755 cm<sup>-1</sup>; HRMS (ESI-TOF) calcd for C<sub>30</sub>H<sub>22</sub>Cl<sub>2</sub>N<sub>2</sub>NaO<sub>2</sub> [M+H]<sup>+</sup> 535.0951, found 535.0968; HPLC: Phenomenex Lux Cellulose-1, hexane:2-propanol 60:40, 1 mL/min, λ = 254 nm, *t*<sub>R</sub> (major) = 10.9 min, *t*<sub>R</sub> (minor) = 22.3 min.

**(S)-1-(2,6-Dichlorobenzyl)-3-((2-methoxyphenyl)amino)-3-(phenylethynyl)indolin-2-one (7d).**

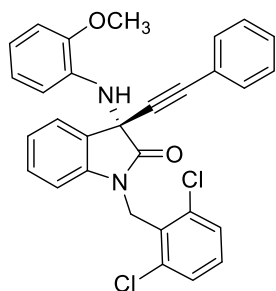

This compound was obtained from **6d** (0.1 mmol, 41 mg). White solid, yield: 44 mg, 85%; m.p. 168-171 °C;  $[\alpha]_D^{25} = +22.7$  (c 0.8, CH<sub>2</sub>Cl<sub>2</sub>, 30% ee); <sup>1</sup>H NMR (500 MHz, CDCl<sub>3</sub>) δ 3.87 (s, 3H), 5.16 (d, *J* = 15.2 Hz, 1H), 5.34 (s, 1H), 5.44 (d, *J* = 15.2 Hz, 1H), 6.54 (d, *J* = 7.7 Hz, 1H), 6.68 (t, *J* = 7.5 Hz, 1H), 6.73 (7, *J* = 7.6 Hz, 1H), 6.78 (d, *J* = 8.5 Hz, 2H), 7.06 (t, *J* = 7.5 Hz, 1H), 7.19 (d, *J* = 8.5 Hz, 1H), 7.23 (d, *J* = 8.0 Hz, 1H), 7.26-7.31 (3H), 7.35 (d, *J* = 7.8 Hz, 2H), 7.42 (d, *J* = 7.8 Hz, 2H), 7.54 (d, *J* = 7.4 Hz, 1H); <sup>13</sup>C NMR (126 MHz, CDCl<sub>3</sub>) δ 40.6, 55.5, 58.9, 85.1, 85.8, 109.8, 109.9, 113.7, 119.0, 120.7, 122.0, 123.4, 124.3, 128.1, 128.7, 128.9, 129.3, 129.7, 129.8, 130.1, 131.9, 134.0, 136.4, 141.5, 147.7, 172.7; IR (neat) ν 3412, 1739, 1601, 1433, 1336, 1239, 751, 728 cm<sup>-1</sup>; HRMS (ESI-TOF) calcd for C<sub>30</sub>H<sub>23</sub>Cl<sub>2</sub>N<sub>2</sub>O<sub>2</sub> [M+H]<sup>+</sup> 513.1131, found 513.1147; HPLC: Phenomenex Lux Cellulose-1, hexane:2-propanol 93:7, 0.7 mL/min, λ = 254 nm, *t*<sub>R</sub> (major) = 27.5 min, *t*<sub>R</sub> (minor) = 31.4 min.

**(S)-1-(2,6-Dichlorobenzyl)-3-(phenylethynyl)-3-(o-tolylamino)indolin-2-one (7e).** This

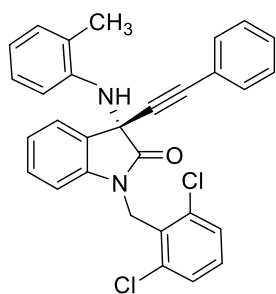

compound was obtained from **6e** (0.1 mmol, 40 mg). White solid, yield: 19 mg, 38%; m.p. 146-148 °C;  $[\alpha]_D^{25} = +33.5$  (c 0.4, CH<sub>2</sub>Cl<sub>2</sub>, 90% ee); <sup>1</sup>H NMR (500 MHz, CDCl<sub>3</sub>) δ 2.27 (s, 3H), 4.50 (s, 1H), 5.18 (d, *J* = 15.2 Hz, 1H), 5.43 (d, *J* = 15.2 Hz, 1H), 6.51 (d, *J* = 8.0 Hz, 1H), 6.72 (t, *J* = 7.4 Hz, 1H), 6.80 (d, *J* = 7.9 Hz, 1H), 6.93 (t, *J* = 8.4 Hz, 1H), 7.03-7.07 m, (m, 2H), 7.19-7.24 (m, 2H), 7.26-7.32 (m, 3H), 7.35 (d, *J* = 8.0 Hz, 2H), 7.42



(dd,  $J_1 = 7.9$  Hz,  $J_2 = 1.6$  Hz, 2H), 7.48 (dd,  $J_1 = 7.7$  Hz,  $J_2 = 0.8$  Hz, 1H);  $^{13}\text{C}$  NMR (126 MHz,  $\text{CDCl}_3$ ):  $\delta$  17.8, 40.7, 59.2, 85.1, 85.9, 109.9, 114.4, 119.6, 121.9, 123.4, 124.3, 124.6, 124.7, 126.6, 128.1, 128.7, 128.9, 129.2, 129.7, 129.8, 130.0, 130.3, 131.9, 136.4, 141.5, 142.3, 172.7; IR (neat)  $\nu$  3425, 1729, 1601, 1487, 1437, 1336, 748  $\text{cm}^{-1}$ ; HRMS (ESI-TOF) calcd for  $\text{C}_{30}\text{H}_{23}\text{Cl}_2\text{N}_2\text{O}$   $[\text{M}+\text{H}]^+$  497.1182, found 497.1198; HPLC: Phenomenex Lux Cellulose-1, hexane:2-propanol 80:20, 1 mL/min,  $\lambda = 254$  nm,  $t_R$  (major) = 7.9 min,  $t_R$  (minor) = 9.1 min.

**(S)-1-(2,6-Dichlorobenzyl)-3-((3,5-dichlorophenyl)amino)-3-(phenylethynyl)indolin-2-one**

**(7g).** This compound was obtained from **6g** (0.1 mmol, 45 mg). White solid, yield: 54 mg, 98%;

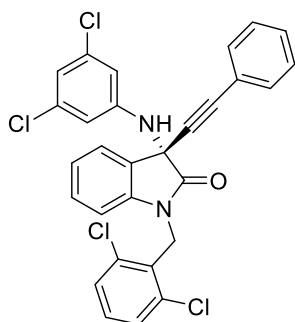

m.p. 225-227 °C;  $[\alpha]_D^{25} = +29.9$  (c 0.7,  $\text{CH}_2\text{Cl}_2$ , 99% ee);  $^1\text{H}$  NMR (500 MHz,  $\text{CDCl}_3$ )  $\delta$  4.71 (s, 1H), 5.21 (d,  $J = 15.2$  Hz, 1H), 5.35 (d,  $J = 15.2$  Hz, 1H), 6.65 (d,  $J = 1.7$  Hz, 2H), 6.77 (t,  $J = 1.7$  Hz, 1H), 6.79 (d,  $J = 7.9$  Hz, 1H), 7.10 (td,  $J = 7.6, 0.8$  Hz, 1H), 7.20-7.33 (m, 5H), 7.36 (d,  $J = 8.0$  Hz, 2H), 7.41 (d,  $J = 8.1, 1.6$  Hz, 2H), 7.50 (dd,  $J_1 = 7.5$  Hz,  $J_2 = 1.2$  Hz, 1H);  $^{13}\text{C}$  NMR (126 MHz,  $\text{CDCl}_3$ )  $\delta$  40.6, 58.6, 84.4, 86.4, 110.2, 114.5, 119.6, 121.5, 123.7, 124.2, 128.2, 129.0, 129.8, 130.0, 130.4,

131.9, 135.0, 136.4, 141.5, 145.9, 171.8. ); IR (neat)  $\nu$  3335, 1712, 1591, 1437, 1343, 1084, 990, 758  $\text{cm}^{-1}$ ; HRMS (ESI-TOF) calcd for  $\text{C}_{29}\text{H}_{19}\text{Cl}_4\text{N}_2\text{O}$   $[\text{M}+\text{H}]^+$  551.0246, found. 551.0243; HPLC: Phenomenex Lux Cellulose-1, hexane:2-propanol 60:40, 1 mL/min,  $\lambda = 254$  nm,  $t_R$  (major) = 6.1 min,  $t_R$  (minor) = 11.7 min.

**(S)-1-Benzyl-3-((3,5-dichlorophenyl)amino)-3-(phenylethynyl)indolin-2-one (7h).** This

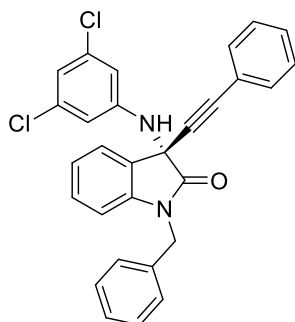

compound was obtained from **6h** (0.1 mmol, 38 mg). White solid, yield: 45 mg, 93%; m.p. 183-185 °C;  $[\alpha]_D^{25} = -33.6$  (c 0.6,  $\text{CH}_2\text{Cl}_2$ , 88% ee);  $^1\text{H}$  NMR (500 MHz,  $\text{CDCl}_3$ )  $\delta$  4.86 (d,  $J = 15.7$  Hz, 1H), 4.94 (s, 1H), 5.11 (d,  $J = 15.7$  Hz, 1H), 6.51 (d,  $J = 1.0$  Hz, 2H), 6.75 (m, 1H), 6.81 (d,  $J = 7.9$  Hz, 1H), 7.13 (td,  $J_1 = 7.6$  Hz,  $J_2 = 0.7$  Hz, 1H), 7.26-7.35 (m, 9H), 7.42 (d,  $J = 7.2$  Hz, 2H), 7.53 (d,  $J = 7.4$  Hz, 1H);  $^{13}\text{C}$  NMR (126 MHz,  $\text{CDCl}_3$ )  $\delta$  44.6, 59.3, 84.5, 86.0, 110.3, 110.4, 114.3, 114.5, 119.8,

119.9, 121.3, 123.9, 124.2, 124.4, 127.1, 127.3, 128.0, 128.3, 129.1, 130.4, 131.9, 132.1, 134.9, 135.1, 141.7, 146.0, 172.7; IR (neat)  $\nu$  3311, 1716, 1595, 1454, 755, 688  $\text{cm}^{-1}$ ; HRMS (ESI-TOF) calcd for  $\text{C}_{29}\text{H}_{21}\text{Cl}_2\text{N}_2\text{O}$   $[\text{M}+\text{H}]^+$  483.1025, found 483.1040; HPLC: Phenomenex Lux Cellulose-1, hexane:2-propanol 80:20, 1 mL/min,  $\lambda = 254$  nm,  $t_R$  (major) = 7.0 min,  $t_R$  (minor) = 15.7 min.

**(S)-3-((3,5-Dichlorophenyl)amino)-1-methyl-3-(phenylethynyl)indolin-2-one (7i).** This

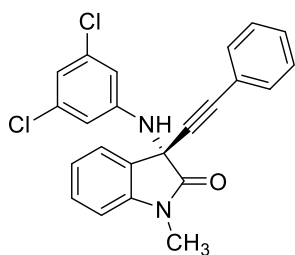

compound was obtained from **6i** (0.1 mmol, 32 mg). White solid, yield: 38 mg, 90%; m.p. 198-200 °C;  $[\alpha]_D^{25} = -43.7$  (c 0.7, CH<sub>2</sub>Cl<sub>2</sub>, 92% ee); <sup>1</sup>H NMR (500 MHz, CDCl<sub>3</sub>) δ 3.30 (s, 3H), 4.75 (s, 1H), 6.54 (m, 2H), 6.75 (m, 1H), 6.95 (d, *J* = 7.8 Hz, 1H), 7.18 (t, *J* = 7.6 Hz, 1H), 7.26-7.34 (m, 3H), 7.40-7.46 (m, 3H), 7.52 (d, *J* = 7.5 Hz, 1H); <sup>13</sup>C NMR (126 MHz, CDCl<sub>3</sub>) δ 26.8, 58.9, 84.2, 86.1, 109.1, 114.2, 119.6, 121.3, 124.0, 124.3, 128.2, 129.1, 130.5, 132.0, 135.0, 142.6, 146.0, 172.4; IR (neat) ν 3294, 1709, 1581, 1447, 751, 684 cm<sup>-1</sup>; HRMS (ESI-TOF) calcd for C<sub>23</sub>H<sub>17</sub>Cl<sub>2</sub>N<sub>2</sub>O [M+H]<sup>+</sup> 407.0712, found 407.0726; HPLC: Phenomenex Lux Cellulose-1, hexane:2-propanol 80:20, 1 mL/min, λ = 254 nm, *t*<sub>R</sub> (major) = 6.3 min, *t*<sub>R</sub> (minor) = 10.8 min.

**(S)-3-((3,5-Dichlorophenyl)amino)-1-(methoxymethyl)-3-(phenylethynyl)indolin-2-one (7j).**

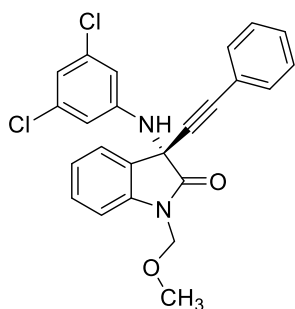

This compound was obtained from **6j** (0.1 mmol, 35 mg). White solid, yield: 43 mg, 93%; m.p. 127-129 °C;  $[\alpha]_D^{25} = -7.7$  (c 0.9, CH<sub>2</sub>Cl<sub>2</sub>, 90% ee); <sup>1</sup>H NMR (500 MHz, CDCl<sub>3</sub>) δ 3.35 (s, 3H), 4.84 (s, 1H), 5.17 (d, *J* = 11.0 Hz, 1H), 5.23 (d, *J* = 11.0 Hz, 1H), 6.50 (d, *J* = 1.6 Hz, 2H), 6.74 (m, 1H), 7.16 (d, *J* = 7.9 Hz, 1H), 7.21 (t, *J* = 7.6 Hz, 1H), 7.26-7.33 (m, 3H), 7.40 (d, *J* = 7.5 Hz, 2H), 7.45 (d, *J* = 7.8 Hz, 1H), 7.55 (d, *J* = 7.5 Hz, 1H); <sup>13</sup>C NMR (126 MHz, CDCl<sub>3</sub>) δ 56.7, 59.4, 72.1, 84.3, 86.2, 110.8, 114.1, 119.8, 121.2, 124.3, 124.5, 127.6, 128.2, 129.1, 130.6, 132.0, 135.1, 140.8, 145.9, 173.1; IR (neat) ν 3304, 1719, 1591, 1454, 1084, 748 cm<sup>-1</sup>; HRMS (ESI-TOF) calcd for C<sub>24</sub>H<sub>19</sub>Cl<sub>2</sub>N<sub>2</sub>O<sub>2</sub> [M+H]<sup>+</sup>: 437.0818, found 437.0834; HPLC: Phenomenex Lux Cellulose-1, hexane:2-propanol 80:20, 1 mL/min, λ = 254 nm, *t*<sub>R</sub> (major) = 6.4 min, *t*<sub>R</sub> (minor) = 10.7 min.

**(S)-3-((3,5-Dichlorophenyl)amino)-3-(phenylethynyl)-1-tritylindolin-2-one (7k).** This

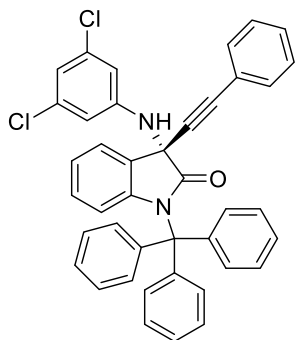

compound was obtained from **6k** (0.1 mmol, 55 mg). White solid, yield: 62 mg, 95%; m.p. 226-228 °C;  $[\alpha]_D^{25} = +48.3$  (c 0.6, CH<sub>2</sub>Cl<sub>2</sub>, 74% ee); <sup>1</sup>H NMR (500 MHz, CDCl<sub>3</sub>) δ 4.84 (s, 1H), 6.19 (d, *J* = 1.4 Hz, 2H), 6.42 (d, *J* = 8.8 Hz, 1H), 6.70 (m, 1H), 7.02 (m, 2H), 7.20-7.22 (m, 3H), 7.25-7.28 (m, 6H), 7.32-7.39 (m, 3H), 7.44-7.47 (m, 9H); <sup>13</sup>C NMR (126 MHz, CDCl<sub>3</sub>) δ 60.1, 74.4, 85.1, 85.3, 114.4, 114.5, 116.6, 119.7, 119.7, 121.5, 123.1, 123.4, 127.0, 127.8, 128.4, 128.7, 129.0, 129.1, 131.9, 134.9, 141.5, 142.7, 146.0, 173.9; IR (neat) ν 3332, 1727, 1593, 1448, 754, 704 cm<sup>-1</sup>; HRMS (ESI-TOF) calcd for C<sub>41</sub>H<sub>29</sub>Cl<sub>2</sub>N<sub>2</sub>O [M+H]<sup>+</sup> 635.1651, found 635.1679; HPLC: Phenomenex Lux

Cellulose-1, hexane:2-propanol 83:17, 0.5 mL/min,  $\lambda = 254$  nm,  $t_R$  (major) = 8.6 min,  $t_R$  (minor) = 21.4 min.

**(S)-1-(2,6-Dichlorobenzyl)-3-((3,5-dichlorophenyl)amino)-3-((2-trifluoromethyl)phenyl)ethynyl)indolin-2-one (8a).** This compound was obtained from **6g** (0.1

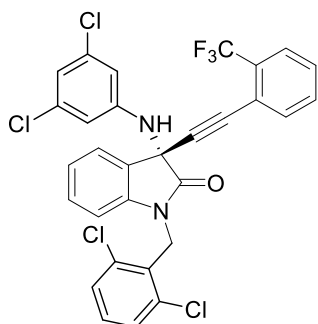

mmol, 45 mg) White solid, yield: 61 mg, 98%; m.p. 172-174 °C;  $[\alpha]_D^{25} = -8.8$  (c 0.6,  $\text{CH}_2\text{Cl}_2$ , 88% ee);  $^1\text{H}$  NMR (500 MHz,  $\text{CDCl}_3$ )  $\delta$  4.66 (s, 1H), 5.22 (d,  $J = 15.2$  Hz, 1H), 5.33 (d,  $J = 15.2$  Hz, 1H), 6.70 (m, 2H), 6.79 (d,  $J = 8.2$  Hz, 2H), 7.10 (t,  $J = 7.6$  Hz, 1H), 7.20-7.28 (m, 2H), 7.35 (d,  $J = 8.3$  Hz, 2H), 7.42 (t,  $J = 7.7$  Hz, 1H), 7.49 (dd,  $J_1 = 14.6$  Hz,  $J_2 = 7.5$  Hz, 2H), 7.57 (d,  $J = 7.6$  Hz, 1H), 7.63 (d,  $J = 7.7$  Hz, 1H);  $^{13}\text{C}$  NMR (126 MHz,  $\text{CDCl}_3$ )  $\delta$  40.7, 58.6, 82.3, 89.7, 110.1, 114.6, 119.8, 120.8 (q,  $J = 275.0$  Hz) 123.7, 124.4, 125.8 (q,  $J = 3.0$  Hz), 127.8, 128.8, 128.9, 129.7, 130.0, 130.5, 131.3, 131.9 (q,  $J = 30.7$  Hz), 134.2, 134.9, 136.4, 141.5, 145.7, 171.3;  $^{19}\text{F}$  NMR (376 MHz,  $\text{CDCl}_3$ )  $\delta$  -62.11; IR (neat)  $\nu$  3319, 1706, 1585, 1318, 1127, 751  $\text{cm}^{-1}$ ; HRMS (ESI-TOF): calcd for  $\text{C}_{30}\text{H}_{18}\text{Cl}_4\text{F}_3\text{N}_2\text{O}$   $[\text{M}+\text{H}]^+$  619.0120, found 619.0154; HPLC: Phenomenex Lux Cellulose-1, hexane:2-propanol 80:20, 1 mL/min,  $\lambda = 254$  nm,  $t_R$  (major) = 5.8 min,  $t_R$  (minor) = 7.6 min.

**(S)-1-(2,6-Dichlorobenzyl)-3-((3,5-dichlorophenyl)amino)-3-((2-fluorophenyl)ethynyl)indolin-2-one (8b).** This compound was obtained from **6g** (0.1 mmol, 45 mg). White solid, yield: 55 mg,

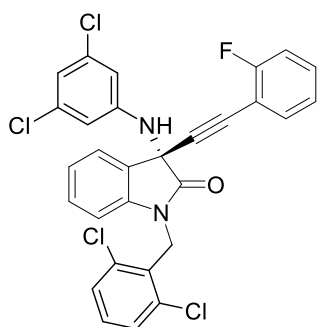

97%; m.p. 212-213 °C;  $[\alpha]_D^{25} = +20.0$  (c 0.7,  $\text{CH}_2\text{Cl}_2$ , 99% ee);  $^1\text{H}$  NMR (500 MHz,  $\text{CDCl}_3$ )  $\delta$  4.70 (s, 1H), 5.21 (d,  $J = 15.2$  Hz, 1H), 5.35 (d,  $J = 15.2$  Hz, 1H), 6.68 (m, 2H), 6.78 (d,  $J = 9.2$  Hz, 2H), 7.03-7.11 (m, 3H), 7.22 (t,  $J = 8.1$  Hz, 1H), 7.26 (t,  $J = 7.8$  Hz, 1H), 7.31 (ddd,  $J_1 = 8.3$  Hz,  $J_2 = 7.7$  Hz,  $J_3 = 1.2$  Hz, 1H), 7.36 (d,  $J = 7.9$  Hz, 2H), 7.39 (t,  $J = 7.3$  Hz, 1H), 7.52 (d,  $J = 7.4$  Hz, 1H);  $^{13}\text{C}$  NMR (126 MHz,  $\text{CDCl}_3$ )  $\delta$  40.6, 58.7, 80.0, 89.4, 110.2, 110.3 (d,  $J = 15.7$  Hz), 114.6, 115.5 (d,  $J = 20.6$  Hz) 119.7, 123.7, 123.9 (d,  $J = 3.8$  Hz), 124.4, 128.1, 129.0, 129.7, 130.0, 130.5, 130.8 (d,  $J = 8.0$  Hz), 133.7, 134.9, 136.4, 141.5, 145.8, 163.0 (d,  $J = 253.4$  Hz), 171.5;  $^{19}\text{F}$  NMR (470 MHz,  $\text{CDCl}_3$ )  $\delta$  -108.8; IR (neat)  $\nu$  3289, 1717, 1593, 1452, 754  $\text{cm}^{-1}$ ; HRMS (ESI-TOF) calcd for  $\text{C}_{29}\text{H}_{18}\text{Cl}_4\text{FN}_2\text{O}$   $[\text{M}+\text{H}]^+$  569.0152, found 569.0173; HPLC: Phenomenex Lux Cellulose-1, hexane:2-propanol 80:20, 1 mL/min,  $\lambda = 254$  nm,  $t_R$  (major) = 8.4 min,  $t_R$  (minor) = 14.1 min.

**(S)-1-(2,6-Dichlorobenzyl)-3-((3,5-dichlorophenyl)amino)-3-((3-**

**methoxyphenyl)ethynyl]indolin-2-one (8c).** This compound was obtained from **6g** (0.1 mmol,

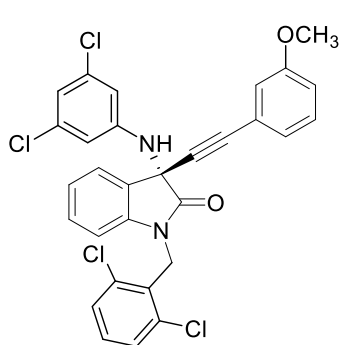

45 mg). White solid, yield; 57 mg, 98%; m.p. 162-164 °C;  $[\alpha]_D^{25}$  = +45.0 (c 0.8, CH<sub>2</sub>Cl<sub>2</sub>, 90% ee); <sup>1</sup>H NMR (500 MHz, CDCl<sub>3</sub>) δ 3.78 (s, 3H), 4.70 (s, 1H), 5.21 (d, *J* = 15.2 Hz, 1H), 5.35 (d, *J* = 15.2 Hz, 1H), 6.66 (d, *J* = 1.7 Hz, 2H), 6.77 (t, *J* = 1.7 Hz, 1H), 6.79 (d, *J* = 7.9 Hz, 1H), 6.88 (dd, *J*<sub>1</sub> = 7.9 Hz, *J*<sub>2</sub> = 3.0 Hz, 1H), 6.93 (m, 1H), 7.00 (d, *J* = 7.6 Hz, 1H), 7.10 (t, *J* = 7.6 Hz, 1H), 7.19 (dd, *J*<sub>1</sub> = 11.2 Hz, *J*<sub>2</sub> = 4.6 Hz, 1H), 7.22-7.27 (m, 2H), 7.35 (d, *J* = 8.1 Hz,

2H), 7.50 (dd, *J*<sub>1</sub> = 7.4 Hz, *J*<sub>2</sub> = 0.8 Hz, 1H); <sup>13</sup>C NMR (126 MHz, CDCl<sub>3</sub>) δ 40.6, 55.3, 58.6, 84.1, 86.4, 110.2, 114.5, 115.9, 116.4, 119.6, 122.4, 123.7, 124.3, 124.4, 128.2, 129.0, 129.3, 129.7, 130.0, 130.4, 134.9, 136.4, 141.5, 145.9, 159.2, 171.8; IR (neat) ν 3312, 1710, 1589, 1200, 781, 744 cm<sup>-1</sup>; HRMS (ESI-TOF) calcd for C<sub>30</sub>H<sub>21</sub>Cl<sub>4</sub>N<sub>2</sub>O<sub>2</sub> [M+H]<sup>+</sup> 581.0352, found 581.0374. HPLC: Phenomenex Lux Cellulose-1, hexane:2-propanol 80:20, 1 mL/min, λ = 254 nm, *t*<sub>R</sub> (major) = 11.1 min, *t*<sub>R</sub> (minor) = 13.9 min.

**(S)-1-(2,6-Dichlorobenzyl)-3-((3,5-dichlorophenyl)amino)-3-(*m*-tolylethynyl)indolin-2-one**

**(8d).** This compound was obtained from **6g** (0.1 mmol, 45 mg). White solid, yield: 55 mg, 97%;

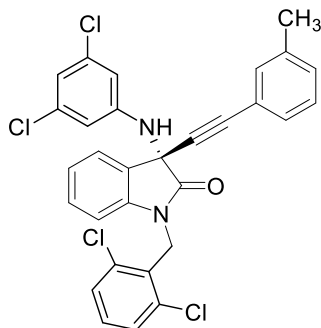

m.p. 185-186 °C;  $[\alpha]_D^{25}$  = +22.2 (c 0.7, CH<sub>2</sub>Cl<sub>2</sub>, 86% ee). <sup>1</sup>H NMR (500 MHz, CDCl<sub>3</sub>) δ 2.30 (s, 3H), 4.71 (s, 1H), 5.21 (d, *J* = 15.8 Hz, 1H), 5.35 (d, *J* = 15.8 Hz, 1H), 6.65 (m, 2H), 6.76 (m, 1H), 6.79 (d, *J* = 7.9 Hz, 1H), 7.09 (t, *J* = 7.6 Hz, 1H), 7.13-7.27 (m, 6H), 7.36 (d, *J* = 7.8 Hz, 2H), 7.50 (d, *J* = 7.4 Hz, 1H); <sup>13</sup>C NMR (126 MHz, CDCl<sub>3</sub>) δ 21.1, 40.6, 58.6, 84.0, 86.7, 110.1, 114.5, 119.6, 121.3, 123.7, 124.2, 128.1, 128.3, 128.9, 129.0, 129.8, 129.9, 129.9, 130.4, 132.5,

134.9, 136.4, 137.9, 141.5, 145.9, 171.8; IR (neat) ν 3319, 1723, 1582, 1442, 985, 751 cm<sup>-1</sup>; HRMS (ESI-TOF) calcd for C<sub>30</sub>H<sub>21</sub>Cl<sub>4</sub>N<sub>2</sub>O [M+H]<sup>+</sup> 565.0403, found 565.0420; HPLC: Phenomenex Lux Cellulose-1, hexane:2-propanol 80:20, 1 mL/min, λ = 254 nm, *t*<sub>R</sub> (major) = 9.2 min, *t*<sub>R</sub> (minor) = 17.1 min.

**(S)-3-((3-Chlorophenyl)ethynyl)-1-(2,6-dichlorobenzyl)-3-((3,5-dichlorophenyl)amino)indolin-2-one (8e).** This compound was obtained from **6g** (0.1 mmol, 45 mg). White solid, yield: 57 mg,

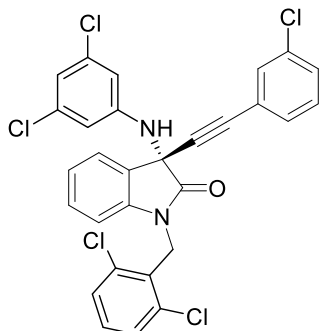

97%; m.p. 170-173 °C;  $[\alpha]_D^{25} = +23.9$  (c 0.8, CH<sub>2</sub>Cl<sub>2</sub>, 92% ee); <sup>1</sup>H NMR (500 MHz, CDCl<sub>3</sub>) δ 4.70 (s, 1H), 5.21 (d, *J* = 15.2 Hz, 1H), 5.35 (d, *J* = 15.2 Hz, 1H), 6.65 (d, *J* = 1.6 Hz, 2H), 6.77 (t, *J* = 1.4 Hz, 1H), 6.80 (d, *J* = 7.9 Hz, 1H), 7.10 (t, *J* = 7.6 Hz, 1H), 7.23 (td, *J*<sub>1</sub> = 8.0 Hz, *J*<sub>2</sub> = 2.3 Hz, 2H), 7.26-7.31 (m, 3H), 7.36 (d, *J* = 8.0 Hz, 2H), 7.39 (m, 1H), 7.49 (d, *J* = 7.5 Hz, 1H); <sup>13</sup>C NMR (126 MHz, CDCl<sub>3</sub>) δ 40.7, 58.6, 85.0, 85.5, 110.2, 114.6, 119.8, 123.1, 123.7, 124.2, 128.0, 129.0, 129.3, 129.5, 129.7, 130.0, 130.6, 131.7, 134.1, 135.0, 136.4, 141.5, 145.7, 171.6; IR (neat) ν 3299, 1713, 1582, 1445, 748, 694 cm<sup>-1</sup>; HRMS (ESI-TOF) calcd for C<sub>29</sub>H<sub>18</sub>Cl<sub>5</sub>N<sub>2</sub>O [M+H]<sup>+</sup> 584.9856, found 584.9878; HPLC: Phenomenex Lux Cellulose-1, hexane:2-propanol 90:10, 1 mL/min, λ = 254 nm, *t*<sub>R</sub> (major) = 13.3 min, *t*<sub>R</sub> (minor) = 16.0 min.

**(S)-1-(2,6-Dichlorobenzyl)-3-((3,5-dichlorophenyl)amino)-3-(*p*-tolylethynyl)indolin-2-one (8f).**

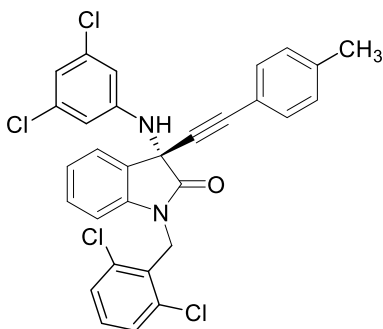

This compound was obtained from **6g** (0.1 mmol, 46 mg). White solid, yield: 57 mg, 98%; m.p. 243-244 °C;  $[\alpha]_D^{25} = +27.1$  (c 0.8, CH<sub>2</sub>Cl<sub>2</sub>, 99% ee); <sup>1</sup>H NMR (500 MHz, CDCl<sub>3</sub>) δ 2.33 (s, 3H), 4.70 (s, 1H), 5.21 (d, *J* = 15.2 Hz, 1H), 5.35 (d, *J* = 15.2 Hz, 1H), 6.63 (d, *J* = 1.7 Hz, 2H), 6.76 (t, *J* = 1.7 Hz, 1H), 6.79 (d, *J* = 7.9 Hz, 1H), 7.08-7.11 (m, 3H), 7.20-7.27 (m, 2H), 7.30 (d, *J* = 8.1 Hz, 2H), 7.35 (d, *J* = 8.1 Hz, 2H), 7.49 (dd, *J*<sub>1</sub> = 7.4 Hz, *J*<sub>2</sub> = 1.1 Hz, 1H); <sup>13</sup>C NMR (126 MHz, CDCl<sub>3</sub>) δ 21.5, 40.6, 58.7, 83.7, 86.6, 110.1, 114.4, 118.4, 119.5, 123.6, 124.2, 128.3, 129.0, 129.8, 129.9, 130.3, 131.8, 134.9, 136.4, 139.2, 141.5, 145.9, 171.9; IR (neat) ν 3339, 1710, 1586, 1432, 1344, 989, 825, 744 cm<sup>-1</sup>; HRMS (ESI-TOF) calcd for C<sub>30</sub>H<sub>21</sub>Cl<sub>4</sub>N<sub>2</sub>O [M+H]<sup>+</sup> 565.0403, found 565.0411; HPLC: Phenomenex Lux Cellulose-1, hexane:2-propanol 70:30, 1 mL/min, λ = 1 nm, *t*<sub>R</sub> (major) = 6.6 min, *t*<sub>R</sub> (minor) = 9.0 min.

**(S)-3-((4-Bromophenyl)ethynyl)-1-(2,6-dichlorobenzyl)-3-((3,5-dichlorophenyl)amino)indolin-2-one (8g).**

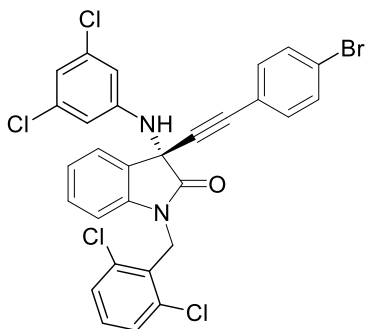

This compound was obtained from **6g** (0.1 mmol, 46 mg). White solid, yield: 62 mg, 96%; m.p. 233-234 °C;  $[\alpha]_D^{25} = +24.6$  (c 0.4, CH<sub>2</sub>Cl<sub>2</sub>, 96% ee); <sup>1</sup>H NMR (500 MHz, CDCl<sub>3</sub>) δ 4.67 (s, 1H), 5.20 (d, *J* = 15.2 Hz, 1H), 5.35 (d, *J* = 15.2 Hz, 1H), 6.65 (d, *J* = 1.7 Hz, 2H), 6.77 (t, *J* = 1.7 Hz, 1H), 6.80 (d, *J* = 8.0 Hz, 1H), 7.10 (t, *J* = 7.5 Hz, 1H), 7.23 (m, 1H), 7.25-7.29 (m, 3H),

7.36 (d,  $J = 8.0$  Hz, 2H), 7.43 (d,  $J = 8.5$  Hz, 2H), 7.49 (d,  $J = 7.5$  Hz, 1H);  $^{13}\text{C}$  NMR (126 MHz,  $\text{CDCl}_3$ )  $\delta$  40.6, 58.6, 85.4, 85.5, 110.2, 114.6, 119.8, 120.4, 123.4, 123.7, 124.2, 128.0, 129.0, 129.7, 130.0, 130.5, 131.5, 133.3, 135.0, 136.3, 141.5, 145.8, 171.6; IR (neat)  $\nu$  3332, 1720, 1593, 1435, 1341, 982, 825, 744  $\text{cm}^{-1}$ ; HRMS (ESI-TOF) calcd for  $\text{C}_{29}\text{H}_{17}\text{BrCl}_4\text{N}_2\text{NaO}$   $[\text{M}+\text{Na}]^+$  650.9171, found 650.9173; HPLC: Phenomenex Lux Cellulose-1, hexane:2-propanol 90:10, 0.7 mL/min,  $\lambda = 254$  nm,  $t_{\text{R}}$  (major) = 20.0 min,  $t_{\text{R}}$  (minor) = 17.9 min.

**(S)-1-(2,6-Dichlorobenzyl)-3-((3,5-dichlorophenyl)amino)-3-((4-**

**(trifluoromethyl)phenyl)ethynyl)indolin-2-one (8h).** This compound was obtained from **6g** (0.1

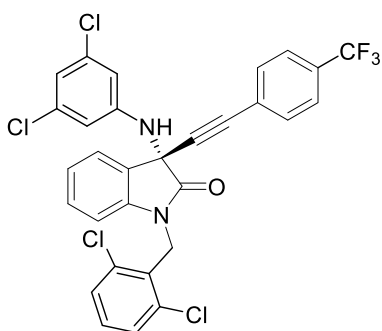

mmol, 45 mg). White solid, yield: 61 mg, 98%; m.p. 200-202  $^{\circ}\text{C}$ ;  $[\alpha]_{\text{D}}^{25} = +14.3$  (c 0.8,  $\text{CH}_2\text{Cl}_2$ , 98% ee);  $^1\text{H}$  NMR (500 MHz,  $\text{CDCl}_3$ )  $\delta$  4.72 (s, 1H), 5.21 (d,  $J = 15.2$  Hz, 1H), 5.36 (d,  $J = 15.2$  Hz, 1H), 6.68 (d,  $J = 1.7$  Hz, 2H), 6.79 (t,  $J = 1.7$  Hz, 1H), 6.81 (d,  $J = 7.9$  Hz, 1H), 7.11 (td,  $J_1 = 7.6$  Hz,  $J_2 = 0.9$  Hz, 1H), 7.23 (m, 1H), 7.28 (td,  $J = 7.9$ , 1.3 Hz, 1H), 7.36 (d,  $J = 8.0$  Hz, 2H), 7.50 (d,  $J = 7.9$  Hz, 3H), 7.55 (d,  $J = 8.4$  Hz, 2H);  $^{13}\text{C}$  NMR

(126 MHz,  $\text{CDCl}_3$ )  $\delta$  40.7, 58.6, 85.0, 86.7, 110.3, 114.6, 119.8, 123.7 (q,  $J = 272.3$  Hz), 123.8, 124.3, 125.2 (q,  $J = 3.0$  Hz), 127.9, 129.0, 129.7, 130.1, 130.6, 130.7, 130.8, 132.1, 135.0, 136.4, 141.5, 145.7, 171.6;  $^{19}\text{F}$  NMR (470 MHz,  $\text{CDCl}_3$ )  $\delta$  -62.9; IR (neat)  $\nu$  3344, 1717, 1590, 1326, 1130, 1061, 989, 844, 746  $\text{cm}^{-1}$ ; HRMS (ESI-TOF) calcd for  $\text{C}_{30}\text{H}_{17}\text{Cl}_4\text{F}_3\text{N}_2\text{NaO}$   $[\text{M}+\text{Na}]^+$  640.9939, found 640.9948; HPLC: Phenomenex Lux Cellulose-1, hexane:2-propanol 90:10, 1 mL/min,  $\lambda = 254$  nm,  $t_{\text{R}}$  (major) = 16.2 min,  $t_{\text{R}}$  (minor) = 11.0 min.

**Methyl (S)-4-((1-(2,6-dichlorobenzyl)-3-((3,5-dichlorophenyl)amino)-2-oxoindolin-3-yl)ethynyl)benzoate (8i).** This compound was obtained from **6g** (0.1 mmol, 46 mg). White solid,

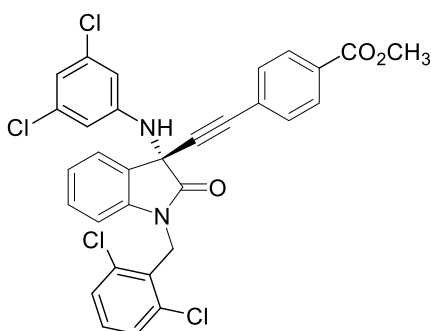

yield: 59 mg, 96%; m.p. 181-182  $^{\circ}\text{C}$ ;  $[\alpha]_{\text{D}}^{25} = +21.1$  (c 1.1,  $\text{CH}_2\text{Cl}_2$ , 96% ee);  $^1\text{H}$  NMR (500 MHz,  $\text{CDCl}_3$ )  $\delta$  3.91 (s, 3H), 4.75 (s, 1H), 5.21 (d,  $J = 15.2$  Hz, 1H), 5.35 (d,  $J = 15.2$  Hz, 1H), 6.66 (d,  $J = 1.7$  Hz, 2H), 6.78 (t,  $J = 1.7$  Hz, 1H), 6.80 (d,  $J = 7.9$  Hz, 1H), 7.10 (td,  $J_1 = 7.6$  Hz,  $J_2 = 0.8$  Hz, 1H), 7.23 (m, 1H), 7.27 (td,  $J_1 = 7.8$  Hz,  $J_2 = 1.3$  Hz, 1H), 7.36 (d,  $J = 8.0$  Hz, 2H), 7.46 (d,  $J = 8.5$  Hz, 2H), 7.50 (dd,  $J_1 = 7.5$

Hz,  $J_2 = 1.0$  Hz, 1H), 7.96 (d,  $J = 8.5$  Hz, 2H);  $^{13}\text{C}$  NMR (126 MHz,  $\text{CDCl}_3$ )  $\delta$  40.7, 52.2, 58.7, 85.6, 87.2, 110.3, 112.8, 114.5, 118.6, 119.7, 122.9, 123.8, 124.3, 126.1, 127.9, 129.0, 129.4, 129.7, 130.0, 130.2, 130.6, 131.8, 135.0, 136.4, 141.5, 145.8, 166.3, 171.7. IR (neat)  $\nu$  3340, 1717, 1590,

1434, 1275, 1090, 985, 750  $\text{cm}^{-1}$ ; HRMS (ESI-TOF) calcd for  $\text{C}_{31}\text{H}_{20}\text{Cl}_4\text{N}_2\text{NaO}_3$   $[\text{M}+\text{Na}]^+$  631.0120, found 631.0131; HPLC: Phenomenex Lux Cellulose-1, hexane:2-propanol 90:10, 1 mL/min,  $\lambda = 254$  nm,  $t_{\text{R}}$  (major) = 24.1 min,  $t_{\text{R}}$  (minor) = 20.9 min.

**(S)-1-(2,6-Dichlorobenzyl)-3-((3,5-dichlorophenyl)amino)-3-(4-phenylbut-1-yn-1-yl)indolin-2-one (8j).** This compound was obtained from **6g** (0.1 mmol, 45 mg). White solid, yield: 56 mg,

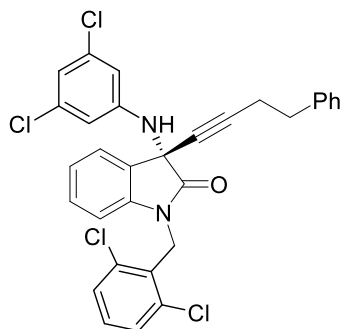

96%; m.p. 166-169 °C (from AcOEt);  $[\alpha]_{\text{D}}^{25} = -5.6$  (c 1.2,  $\text{CH}_2\text{Cl}_2$ , 92% ee);  $^1\text{H}$  NMR (500 MHz,  $\text{CDCl}_3$ )  $\delta$  2.48 (t,  $J = 7.6$  Hz, 2H), 2.80 (t,  $J = 7.6$  Hz, 2H), 4.59 (s, 1H), 5.19 (d,  $J = 15.2$  Hz, 1H), 5.30 (d,  $J = 15.2$  Hz, 1H), 6.51 (d,  $J = 1.2$  Hz, 2H), 6.73 (t,  $J = 1.2$  Hz, 1H), 6.78 (d,  $J = 7.8$  Hz, 1H), 7.07 (t,  $J = 7.5$  Hz, 1H), 7.13 (m, 2H), 7.17-7.26 (m, 5H), 7.34-7.37 (m, 3H);  $^{13}\text{C}$  NMR (126 MHz,  $\text{CDCl}_3$ )  $\delta$  21.0, 34.4, 40.6, 58.2, 76.7, 86.8, 110.1, 114.2, 119.4, 123.5, 124.1,

126.3, 128.3, 128.4, 128.5, 128.9, 129.8, 129.9, 130.2, 134.9, 136.4, 140.1, 141.6, 145.9, 172.1; IR (neat)  $\nu$  3289, 1713, 1582, 1445, 748, 694  $\text{cm}^{-1}$ ; HRMS (ESI-TOF) calcd for  $\text{C}_{31}\text{H}_{23}\text{Cl}_4\text{N}_2\text{O}$   $[\text{M}+\text{H}]^+$  579.0559, found. 579.0587; HPLC: Phenomenex Lux Cellulose-2, hexane:2-propanol 95:5, 0.7 mL/min,  $\lambda = 254$  nm,  $t_{\text{R}}$  (major) = 15.7 min,  $t_{\text{R}}$  (minor) = 19.9 min.

**(R)-1-(2,6-Dichlorobenzyl)-3-((3,5-dichlorophenyl)amino)-3-((trimethylsilyl)ethynyl)indolin-2-one (8k).** This compound was obtained from **6g** (0.1 mmol, 45 mg). White solid, yield: 52 mg,

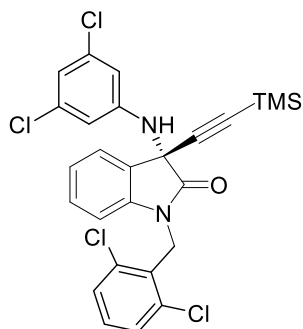

95%; m.p. 157-158 °C;  $[\alpha]_{\text{D}}^{25} = +2.9$  (c 0.4,  $\text{CH}_2\text{Cl}_2$ , 90% ee);  $^1\text{H}$  NMR (500 MHz,  $\text{CDCl}_3$ )  $\delta$  0.16 (s, 9H), 4.54 (s, 1H), 5.16 (d,  $J = 15.2$  Hz, 1H), 5.33 (d,  $J = 15.2$  Hz, 1H), 6.63 (d,  $J = 1.7$  Hz, 2H), 6.74-6.76 (2H), 7.07 (td,  $J_1 = 7.6$  Hz,  $J_2 = 0.9$  Hz, 1H), 7.20-7.26 (m, 2H), 7.35 (d,  $J = 8.2$  Hz, 2H), 7.43 (d,  $J = 7.4$  Hz, 1H);  $^{13}\text{C}$  NMR (126 MHz,  $\text{CDCl}_3$ )  $\delta$  -0.42, 40.5, 58.6, 92.4, 99.5, 110.0, 114.5, 119.6, 123.6, 124.2, 128.2, 129.0, 129.7, 129.9, 130.3, 134.8, 136.4, 141.5, 145.8, 171.6; IR (neat)  $\nu$

3346, 1713, 1586, 989, 841, 751  $\text{cm}^{-1}$ ; HRMS (ESI-TOF) calcd for  $\text{C}_{26}\text{H}_{22}\text{Cl}_4\text{N}_2\text{NaOSi}$   $[\text{M}+\text{Na}]^+$  569.0148, found 569.0149; HPLC: Phenomenex Lux i-Amylose-3, hexane:2-propanol 80:20, 1 mL/min,  $\lambda = 254$  nm,  $t_{\text{R}}$  (major) = 16.2 min,  $t_{\text{R}}$  (minor) = 18.2 min.

**(S)-3-(3-((Tert-butyl)dimethylsilyloxy)prop-1-yn-1-yl)-1-(2,6-dichlorobenzyl)-3-((3,5-dichlorophenyl)amino)indolin-2-one (8l).** This compound was obtained from **6g** (0.1 mmol, 43

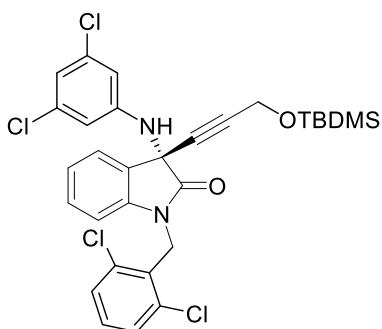

mg). White solid, yield: 56 mg, 95%; m.p. 134-136 °C;  $[\alpha]_D^{25} = -17.4$  (c 0.4, CH<sub>2</sub>Cl<sub>2</sub>, 96% ee); <sup>1</sup>H NMR (500 MHz, CDCl<sub>3</sub>) δ 0.04 (s, 3H), 0.05 (s, 3H), 0.85 (s, 9H), 4.32 (s, 2H), 4.64 (s, 1H), 5.19 (d, *J* = 15.1 Hz, 1H), 5.29 (d, *J* = 15.1 Hz, 1H), 6.51 (d, *J* = 1.7 Hz, 2H), 6.74 (t, *J* = 1.6 Hz, 1H), 6.78 (d, *J* = 8.0 Hz, 1H), 7.06 (t, *J* = 1.9 Hz, 1H), 7.20-7.26 (m, 2H), 7.35 (d, *J* = 8.1 Hz, 2H), 7.41 (d, *J* = 7.5 Hz, 1H); <sup>13</sup>C NMR (126 MHz, CDCl<sub>3</sub>) δ -5.22, 18.1, 25.7, 40.7, 51.6, 58.2, 80.1, 85.1, 110.1, 114.3, 119.6, 123.6, 124.2, 127.9, 128.9, 129.8, 130.0, 130.4, 135.0, 136.4, 141.5, 145.8, 171.6; IR (neat) ν 3319, 1720, 1589, 1435, 1093, 835, 784, 744 cm<sup>-1</sup>; HRMS (ESI-TOF) calcd for C<sub>30</sub>H<sub>30</sub>Cl<sub>4</sub>N<sub>2</sub>NaO<sub>2</sub>Si [M+Na]<sup>+</sup> 641.0723, found 641.0714; HPLC: Phenomenex Lux i-Amylose-3, hexane:2-propanol 60:40, 1 mL/min, λ = 254 nm, *t*<sub>R</sub> (major) = 23.8 min, *t*<sub>R</sub> (minor) = 12.3 min.

**(S)-1-(2,6-Dichlorobenzyl)-3-((3,5-dichlorophenyl)amino)-3-(oct-1-yn-1-yl)indolin-2-one (8m).**

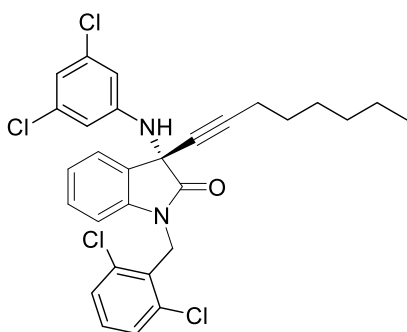

This compound was obtained from **6g** (0.1 mmol, 45 mg). Pale yellow solid, yield: 54 mg, 96%; m.p. 180-182 °C (from AcOEt);  $[\alpha]_D^{25} = -5.2$  (c 0.5, CH<sub>2</sub>Cl<sub>2</sub>, 88% ee); <sup>1</sup>H NMR (500 MHz, CDCl<sub>3</sub>) δ 0.86 (t, *J* = 7.0 Hz, 3H), 1.20-1.34 (m, 6H), 1.48 (m, 2H), 2.18 (t, *J* = 7.2 Hz, 2H), 4.58 (s, 1H), 5.17 (d, *J* = 15.2 Hz, 1H), 5.31 (d, *J* = 15.2 Hz, 1H), 6.57 (d, *J* = 1.7 Hz, 2H), 6.73 (t, *J* = 1.7 Hz, 1H), 6.75 (d, *J* = 7.9 Hz, 1H), 7.06 (td, *J*<sub>1</sub> = 7.6 Hz, *J*<sub>2</sub> = 0.8 Hz, 1H), 7.20-7.24 (m, 2H), 7.35 (d, *J* = 8.0 Hz, 2H), 7.41 (dd, *J*<sub>1</sub> = 7.4 Hz, *J*<sub>2</sub> = 1.0 Hz, 1H); <sup>13</sup>C NMR (126 MHz, CDCl<sub>3</sub>) δ 14.0, 18.8, 22.4, 28.1, 28.4, 31.2, 40.5, 58.2, 75.7, 87.9, 110.0, 114.3, 119.4, 123.5, 124.0, 128.8, 128.9, 129.9, 129.9, 130.1, 134.9, 136.4, 141.4, 146.0, 172.2; IR (neat) ν 3309, 1717, 1586, 1435, 751 cm<sup>-1</sup>; HRMS (ESI-TOF): calcd for C<sub>29</sub>H<sub>27</sub>Cl<sub>4</sub>N<sub>2</sub>O [M+H]<sup>+</sup> 559.0872, found 559.0894; HPLC: Phenomenex Lux i-Amylose-1, hexane:2-propanol 70:30, 1 mL/min, λ = 254 nm, *t*<sub>R</sub> (major) = 28.8 min, *t*<sub>R</sub> (minor) = 14.6 min.

**(S)-3-(4-Bromobut-1-yn-1-yl)-1-(2,6-dichlorobenzyl)-3-((3,5-dichlorophenyl)amino)indolin-2-**

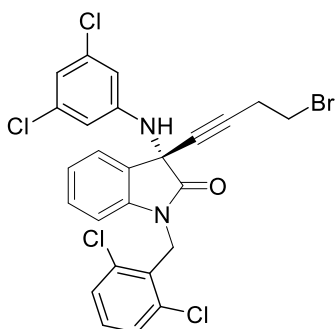

**one (8n).** This compound was obtained from **6g** (0.1 mmol, 46 mg). White solid, yield: 58 mg, 97%; m.p. 154-155 °C (from AcOEt);  $[\alpha]_D^{25} = -6.4$  (c 0.9, CH<sub>2</sub>Cl<sub>2</sub>, 88% ee); <sup>1</sup>H NMR (500 MHz, CDCl<sub>3</sub>): δ = 2.77 (t, *J* = 7.2 Hz, 2H), 3.39 (t, *J* = 7.2 Hz, 2H), 4.57 (s, 1H), 5.18 (d, *J* = 15.2 Hz, 1H), 5.31 (d, *J* = 15.2 Hz, 1H), 6.59 (m, 2H), 6.77 (d, *J* = 8.5 Hz, 2H), 7.08 (t, *J* = 7.6 Hz, 1H), 7.20-7.26 (m,



2H), 7.36 (d,  $J = 8.2$  Hz, 2H), 7.43 (d,  $J = 7.4$  Hz, 1H);  $^{13}\text{C}$  NMR (126 MHz,  $\text{CDCl}_3$ )  $\delta$  23.2, 28.5, 40.6, 58.1, 77.8, 84.2, 110.1, 114.5, 119.7, 123.6, 124.1, 128.2, 129.0, 129.7, 130.0, 130.4, 134.9, 136.4, 141.4, 145.8, 171.8; IR (neat)  $\nu$  3312, 1720, 1586, 1435, 989, 748  $\text{cm}^{-1}$ ; HRMS (ESI-TOF) calcd for  $\text{C}_{25}\text{H}_{18}\text{BrCl}_4\text{N}_2\text{O}$   $[\text{M}+\text{H}]^+$  580.9351, found 580.9367; HPLC: Phenomenex Lux Cellulose-1, hexane:2-propanol 80:20, 1 mL/min,  $\lambda = 254$  nm,  $t_{\text{R}}$  (major) = 8.9 min,  $t_{\text{R}}$  (minor) = 10.9 min.

**(S)-1-(2,6-Dichlorobenzyl)-3-((3,5-dichlorophenyl)amino)-3-(3,3-dimethylbut-1-yn-1-yl)indolin-2-one (8o).** This compound was obtained from **6g** (0.1 mmol, 44 mg). Colorless oil,

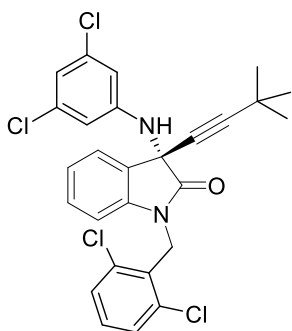

yield: 50 mg, 94%;  $[\alpha]_{\text{D}}^{25} = +12.6$  (c 0.7,  $\text{CH}_2\text{Cl}_2$ , 78% ee);  $^1\text{H}$  NMR (500 MHz,  $\text{CDCl}_3$ )  $\delta$  1.19 (s, 9H), 4.48 (s, 1H), 5.14 (d,  $J = 15.2$  Hz, 1H), 5.33 (d,  $J = 15.2$  Hz, 1H), 6.66 (d,  $J = 1.7$  Hz, 2H), 6.73 (d,  $J = 7.9$  Hz, 1H), 6.74 (t,  $J = 1.7$  Hz, 1H), 7.06 (td,  $J_1 = 7.6$  Hz,  $J_2 = 0.9$  Hz, 1H), 7.21 (m, 2H), 7.35 (d,  $J = 8.1$  Hz, 2H), 7.40 (dd,  $J_1 = 7.5$  Hz,  $J_2 = 0.9$  Hz, 1H);  $^{13}\text{C}$  NMR (126 MHz,  $\text{CDCl}_3$ )  $\delta$  27.5, 30.5, 40.4, 58.0, 74.1, 95.9, 109.9, 114.5, 119.3, 123.5, 124.0, 129.0, 129.1, 129.8, 129.9, 130.1, 134.8,

136.4, 141.4, 146.1, 172.2; IR (neat)  $\nu$  3344, 1710, 1579, 1456, 1351, 989, 757  $\text{cm}^{-1}$ ; HRMS (ESI-TOF) calcd for  $\text{C}_{27}\text{H}_{23}\text{Cl}_4\text{N}_2\text{O}$   $[\text{M}+\text{H}]^+$  531.0559, found 531.0556; HPLC: Phenomenex Lux i-Amylose-1, hexane:2-propanol 90:10, 0.7 mL/min,  $\lambda = 254$  nm,  $t_{\text{R}}$  (major) = 28.7 min,  $t_{\text{R}}$  (minor) = 25.1 min.

**(S)-1-(2,6-Dichlorobenzyl)-3-((3,5-dichlorophenyl)amino)-5-fluoro-3-(phenylethynyl)indolin-2-one (9a).** This compound was obtained from **6n** (0.1 mmol, 47 mg). White solid, yield: 56 mg,

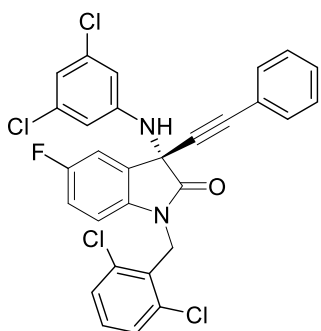

98%; m.p. 221-222  $^{\circ}\text{C}$ ;  $[\alpha]_{\text{D}}^{25} = +40.3$  (c 0.7,  $\text{CH}_2\text{Cl}_2$ , 99% ee);  $^1\text{H}$  NMR (500 MHz,  $\text{CDCl}_3$ )  $\delta$  4.75 (s, 1H), 5.20 (d,  $J = 15.2$  Hz, 1H), 5.36 (d,  $J = 15.2$  Hz, 1H), 6.56 (d,  $J = 1.7$  Hz, 2H), 6.75 (m, 1H), 6.79 (t,  $J = 1.7$  Hz, 1H), 6.97 (td,  $J_1 = 8.8$  Hz,  $J_2 = 2.7$  Hz, 1H), 7.23-7.26 (2H), 7.29-7.35 (3H), 7.37 (d,  $J = 8.1$  Hz, 2H), 7.43 (dd,  $J_1 = 8.1$  Hz,  $J_2 = 1.4$  Hz, 2H);  $^{13}\text{C}$  NMR (126 MHz,  $\text{CDCl}_3$ )  $\delta$  40.8, 58.9, 83.9, 86.6, 111.0 (d,  $J = 7.9$  Hz), 112.4 (d,  $J = 25.0$  Hz), 114.3, 116.9 (d,  $J = 23.6$  Hz), 119.9,

121.2, 128.3, 129.0, 129.2, 129.5, 129.7 (d,  $J = 7.7$  Hz), 130.1, 131.9, 135.1, 136.4, 137.4 (d,  $J = 2.3$  Hz), 145.6, 159.6 (d,  $J = 243.9$  Hz), 171.6;  $^{19}\text{F}$  NMR (470 MHz,  $\text{CDCl}_3$ )  $\delta$  -118.1; IR (neat)  $\nu$  3309, 1710, 1593, 1489, 959, 758  $\text{cm}^{-1}$ ; HRMS (ESI-TOF) calcd for  $\text{C}_{29}\text{H}_{18}\text{Cl}_4\text{FN}_2\text{O}$   $[\text{M}+\text{H}]^+$  569.0152, found 569.0167; HPLC: Phenomenex Lux Cellulose-1, hexane:2-propanol 80:20, 1 mL/min,  $\lambda = 254$  nm,  $t_{\text{R}}$  (major) = 8.4 min,  $t_{\text{R}}$  (minor) = 17.9 min.

**(S)-5-Chloro-1-(2,6-dichlorobenzyl)-3-((3,5-dichlorophenyl)amino)-3-(phenylethynyl)indolin-2-one (9b).** This compound was obtained from **6o** (0.1 mmol, 48 mg). White solid, yield: 56 mg,

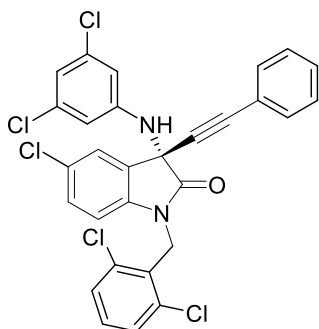

96%; m.p. 197-198 °C;  $[\alpha]_D^{25} = +66.5$  (c 0.8, CH<sub>2</sub>Cl<sub>2</sub>, 99% ee); <sup>1</sup>H NMR (500 MHz, CDCl<sub>3</sub>) δ 4.75 (s, 1H), 5.20 (d, *J* = 15.2 Hz, 1H), 5.36 (d, *J* = 15.2 Hz, 1H), 6.58 (d, *J* = 1.7 Hz, 2H), 6.73 (d, *J* = 8.5 Hz, 1H), 6.79 (t, *J* = 1.7 Hz, 1H), 7.22-7.26 (2H), 7.29-7.35 (3H), 7.37 (d, *J* = 8.1 Hz, 2H), 7.42 (dd, *J*<sub>1</sub> = 8.2 Hz, *J*<sub>2</sub> = 1.5 Hz, 2H), 7.48 (d, *J* = 2.1 Hz, 1H); <sup>13</sup>C NMR (126 MHz, CDCl<sub>3</sub>) δ 40.7, 58.6, 83.7, 86.8, 111.2, 114.3, 119.9, 121.9, 124.7, 128.3, 129.0, 129.2, 129.4, 129.8, 130.2, 130.4,

131.9, 135.1, 136.4, 139.9, 145.5, 171.4; IR (neat) ν 3306, 1706, 1586, 1438, 758, 677 cm<sup>-1</sup>; HRMS (ESI-TOF) calcd for C<sub>29</sub>H<sub>18</sub>Cl<sub>5</sub>N<sub>2</sub>O [M+H]<sup>+</sup> 584.9856, found 584.9868; HPLC: Phenomenex Lux Cellulose-1, hexane:2-propanol 80:20, 1 mL/min, λ = 254 nm, *t*<sub>R</sub> (major) = 9.1 min, *t*<sub>R</sub> (minor) = 14.6 min.

**(S)-5-Bromo-1-(2,6-dichlorobenzyl)-3-((3,5-dichlorophenyl)amino)-3-(phenylethynyl)indolin-2-one (9c).** This compound was obtained from **6p** (0.1 mmol, 53 mg). White solid, yield: 60 mg,

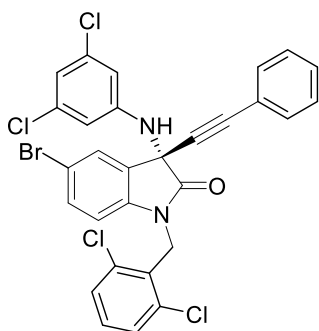

95%; m.p. 169-171 °C;  $[\alpha]_D^{25} = +66.4$  (c 0.5, CH<sub>2</sub>Cl<sub>2</sub>, 99% ee); <sup>1</sup>H NMR (500 MHz, CDCl<sub>3</sub>) δ 4.73 (s, 1H), 5.19 (d, *J* = 15.2 Hz, 1H), 5.35 (d, *J* = 15.2 Hz, 1H), 6.59 (d, *J* = 1.7 Hz, 2H), 6.68 (d, *J* = 8.4 Hz, 1H), 6.79 (t, *J* = 1.7 Hz, 1H), 7.25 (m, 1H), 7.29-7.40 (6H), 7.43 (dd, *J*<sub>1</sub> = 8.2 Hz, *J*<sub>2</sub> = 1.4 Hz, 2H), 7.61 (d, *J* = 2.0 Hz, 1H); <sup>13</sup>C NMR (126 MHz, CDCl<sub>3</sub>) δ 40.7, 58.6, 83.7, 86.9, 111.7, 114.3, 116.4, 119.9, 121.1, 127.4, 128.3, 129.0, 129.2, 129.4, 130.1, 130.2, 131.9, 133.3, 135.1, 136.3,

140.4, 145.5, 171.2; IR (neat) ν 3312, 1717, 1586, 1482, 1432, 761, 677, 533 cm<sup>-1</sup>; HRMS (ESI-TOF): calcd for C<sub>29</sub>H<sub>18</sub>BrCl<sub>4</sub>N<sub>2</sub>O [M+H]<sup>+</sup> 628.9351, found 628.9365; HPLC: Phenomenex Lux Cellulose-1, hexane:2-propanol 80:20, 1 mL/min, λ = 254 nm, *t*<sub>R</sub> (major) = 10.2 min, *t*<sub>R</sub> (minor) = 14.9 min.

**(S)-1-(2,6-Dichlorobenzyl)-3-((3,5-dichlorophenyl)amino)-5-methyl-3-(phenylethynyl)indolin-2-one (9d).** This compound was obtained from **6q** (0.1 mmol, 45

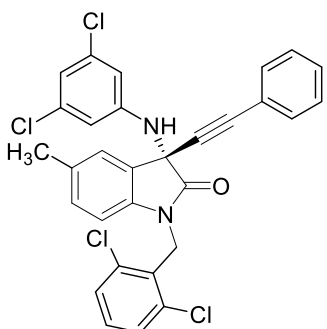

mg). White solid, yield: 54 mg, 98%; m.p. 236-237 °C;  $[\alpha]_D^{25} = +42.8$  (c 0.5, CH<sub>2</sub>Cl<sub>2</sub>, 99% ee); <sup>1</sup>H NMR (500 MHz, CDCl<sub>3</sub>) δ 2.31 (s, 3H), 4.72 (s, 1H), 5.19 (d, *J* = 15.2 Hz, 1H), 5.35 (d, *J* = 15.2 Hz, 1H), 6.64 (d, *J* = 1.8 Hz, 2H), 6.68 (d, *J* = 8.1 Hz, 1H), 6.76 (t, *J* = 1.8 Hz, 1H), 7.05 (dd, *J*<sub>1</sub> = 8.8 Hz, *J*<sub>2</sub> = 1.7 Hz, 1H), 7.22 (dd, *J*<sub>1</sub> = 8.5 Hz, *J*<sub>2</sub> = 7.6 Hz, 1H),

7.29-7.32 (m, 4H), 7.35 (d,  $J = 8.0$  Hz, 2H), 7.42 (dd,  $J_1 = 8.1$  Hz,  $J_2 = 1.6$  Hz, 2H);  $^{13}\text{C}$  NMR (126 MHz,  $\text{CDCl}_3$ )  $\delta$  21.0, 40.6, 58.7, 84.5, 86.3, 109.9, 114.4, 119.5, 121.5, 124.9, 128.2, 128.9, 129.9, 129.9, 130.7, 133.4, 134.9, 136.4, 139.0, 146.0, 171.8; IR (neat)  $\nu$  3306, 1713, 1589, 1435, 1096, 989, 761  $\text{cm}^{-1}$ ; HRMS (ESI-TOF) calcd for  $\text{C}_{30}\text{H}_{21}\text{Cl}_4\text{N}_2\text{O}$   $[\text{M}+\text{H}]^+$  565.0403, found 565.0416; HPLC: Phenomenex Lux Cellulose-1, hexane:2-propanol 80:20, 1 mL/min,  $\lambda = 254$  nm,  $t_R$  (major) = 7.7 min,  $t_R$  (minor) = 12.7 min.

**(S)-1-(2,6-Dichlorobenzyl)-3-((3,5-dichlorophenyl)amino)-5-methoxy-3-**

**(phenylethynyl)indolin-2-one (9e).** This compound was obtained from **6r** (0.1 mmol, 48 mg).

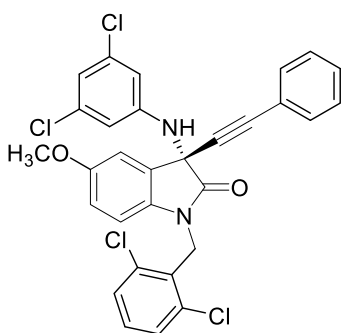

White solid, yield: 57 mg, 98%; m.p. 204-205 °C;  $[\alpha]_D^{25} = +50.8$  (c 0.6,  $\text{CH}_2\text{Cl}_2$ , 86% ee);  $^1\text{H}$  NMR (500 MHz,  $\text{CDCl}_3$ )  $\delta$  3.76 (s, 3H), 4.83 (s, 1H), 5.19 (d,  $J = 15.2$  Hz, 1H), 5.35 (d,  $J = 15.2$  Hz, 1H), 6.60 (d,  $J = 1.7$  Hz, 2H), 6.71 (d,  $J = 8.6$  Hz, 1H), 6.75 (t,  $J = 1.7$  Hz, 1H), 6.78 (dd,  $J_1 = 8.7$  Hz,  $J_2 = 2.6$  Hz, 1H), 7.10 (d,  $J = 2.6$  Hz, 1H), 7.22 (dd,  $J_1 = 8.4$  Hz,  $J_2 = 7.7$  Hz, 1H), 7.28-7.33 (3H), 7.36 (d,  $J = 8.0$  Hz, 2H), 7.41 (dd,  $J_1 = 8.2$  Hz,  $J_2 = 1.6$  Hz, 2H);  $^{13}\text{C}$  NMR (126 MHz,  $\text{CDCl}_3$ )  $\delta$

40.7, 55.7, 59.0, 84.5, 86.3, 110.8, 111.3, 114.3, 115.0, 119.6, 121.4, 128.2, 129.0, 129.4, 129.8, 130.0, 131.9, 134.7, 135.0, 136.4, 145.9, 156.6, 171.9; IR (neat)  $\nu$  3312, 1710, 1586, 1492, 1435, 992, 751  $\text{cm}^{-1}$ ; HRMS (ESI-TOF) calcd for  $\text{C}_{30}\text{H}_{21}\text{Cl}_4\text{N}_2\text{O}_2$   $[\text{M}+\text{H}]^+$ : 581.0352, found 581.036; HPLC: Phenomenex Lux Cellulose-1, hexane:2-propanol 80:20, 1 mL/min,  $\lambda = 254$  nm,  $t_R$  (major) = 9.6 min,  $t_R$  (minor) = 15.7 min.

**(S)-1-(2,6-Dichlorobenzyl)-3-((3,5-dichlorophenyl)amino)-5-nitro-3-(phenylethynyl)indolin-2-**

**one (9f).** This compound was obtained from **6s** (0.1 mmol, 50 mg). Pale yellow solid, yield: 56

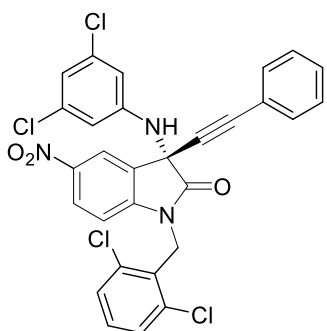

mg, 93%; m.p. 140-143 °C;  $[\alpha]_D^{25} = +17.1$  (c 0.6,  $\text{CH}_2\text{Cl}_2$ , 78% ee);  $^1\text{H}$  NMR (500 MHz,  $\text{CDCl}_3$ )  $\delta$  4.76 (s, 1H), 5.28 (d,  $J = 15.3$  Hz, 1H), 5.42 (d,  $J = 15.3$  Hz, 1H), 6.56 (d,  $J = 1.7$  Hz, 2H), 6.82 (t,  $J = 1.7$  Hz, 1H), 6.92 (d,  $J = 8.8$  Hz, 1H), 7.28 (m, 1H), 7.31-7.37 (3H), 7.40 (d,  $J = 8.0$  Hz, 2H), 7.43 (dd,  $J_1 = 8.3$  Hz,  $J_2 = 1.4$  Hz, 2H), 8.24 (dd,  $J_1 = 8.8$  Hz,  $J_2 = 2.3$  Hz, 1H), 8.38 (d,  $J = 2.3$  Hz, 1H);  $^{13}\text{C}$  NMR (126 MHz,  $\text{CDCl}_3$ )  $\delta$  41.0, 58.3, 82.9, 87.4, 110.0, 114.4, 120.1, 120.4, 120.7, 127.2,

128.4, 128.8, 129.2, 129.5, 130.5, 132.0, 135.2, 136.3, 144.0, 145.1, 146.8, 171.8; IR (neat)  $\nu$  3339, 1733, 1593, 1519, 1334, 764  $\text{cm}^{-1}$ ; HRMS (ESI-TOF) calcd for  $\text{C}_{29}\text{H}_{18}\text{Cl}_4\text{N}_3\text{O}_3$   $[\text{M}+\text{H}]^+$  596.0097, found 596.0105; HPLC: Phenomenex Lux Cellulose-1, hexane:2-propanol 70:30, 1 mL/min,  $\lambda = 254$  nm,  $t_R$  (major) = 20.0 min,  $t_R$  (minor) = 16.0 min.

**(S)-1-(2,6-Dichlorobenzyl)-3-((3,5-dichlorophenyl)amino)-7-methyl-3-(phenylethynyl)indolin-2-one (9g).** This compound was obtained from **6t** (0.1 mmol, 45 mg). White solid, yield: 53 mg,

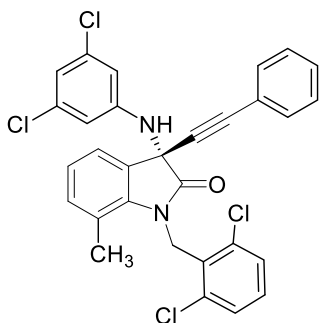

97%; m.p. 188-191 °C;  $[\alpha]_D^{25} = -73.0$  (c 0.7, CH<sub>2</sub>Cl<sub>2</sub>, 98% ee); <sup>1</sup>H NMR (500 MHz, CDCl<sub>3</sub>) δ 2.46 (s, 3H), 4.54 (s, 1H), 5.41 (d, *J* = 16.0 Hz, 1H), 5.52 (d, *J* = 16.0 Hz, 1H), 6.68 (d, *J* = 1.7 Hz, 2H), 6.76 (t, *J* = 1.8 Hz, 1H), 7.06 (t, *J* = 7.6 Hz, 1H), 7.13 (m, 1H), 7.16 (d, *J* = 7.8 Hz, 1H), 7.26-7.29 (m, 4H), 7.31 (m, 1H), 7.37-7.41 (m, 3H); <sup>13</sup>C NMR (126 MHz, CDCl<sub>3</sub>) δ 19.4, 43.7, 58.2, 84.3, 86.5, 114.9, 119.8, 120.8, 121.6, 122.4, 123.7, 128.2, 128.9, 129.1, 131.2, 131.9, 134.4, 134.8,

135.4, 140.6, 145.9, 172.9; IR (neat) ν 3347, 1706, 1590, 1449, 1087, 753 cm<sup>-1</sup>; HRMS (ESI-TOF) calcd for C<sub>30</sub>H<sub>21</sub>Cl<sub>4</sub>N<sub>2</sub>O [M+H]<sup>+</sup> 565.0403, found: 565.0408; HPLC: Phenomenex Lux Cellulose-1, hexane:2-propanol 80:20, 1 mL/min, λ = 254 nm, *t*<sub>R</sub> (major) = 12.8 min, *t*<sub>R</sub> (minor) = 26.0 min.

**(S)-5-Chloro-1-(2,6-dichlorobenzyl)-3-((3,5-dichlorophenyl)amino)-3-((2-fluorophenyl)ethynyl)indolin-2-one (9h).** This compound was obtained from **6o** (0.1 mmol, 48

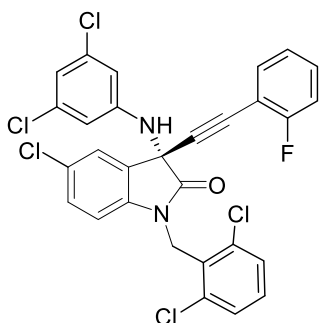

mg). White solid, yield: 58 mg, 97%; m.p. 214-217 °C;  $[\alpha]_D^{25} = +39.0$  (c 0.6, CH<sub>2</sub>Cl<sub>2</sub>, 98% ee); <sup>1</sup>H NMR (500 MHz, CDCl<sub>3</sub>): δ 4.74 (s, 1H), 5.20 (d, *J* = 15.2 Hz, 1H), 5.36 (d, *J* = 15.2 Hz, 1H), 6.62 (d, *J* = 1.7 Hz, 2H), 6.72 (d, *J* = 8.5 Hz, 1H), 6.80 (t, *J* = 1.7 Hz, 1H), 7.06 (dd, *J*<sub>1</sub> = 13.4 Hz, *J*<sub>2</sub> = 5.0 Hz, 1H), 7.09 (td, *J*<sub>1</sub> = 7.6 Hz, *J*<sub>2</sub> = 1.0 Hz, 1H), 7.24 (dd, *J*<sub>1</sub> = 8.5 Hz, *J*<sub>2</sub> = 2.1 Hz, 1H), 7.26 (d, *J* = 3.2 Hz, 1H), 7.33 (m, 1H), 7.37 (d, *J* = 8.0 Hz, 2H), 7.40 (m, 1H), 7.49 (d, *J* = 2.2 Hz, 1H);

<sup>13</sup>C NMR (126 MHz, CDCl<sub>3</sub>): δ 40.8, 58.7, 80.5, 88.7, 109.9 (d, *J* = 15.6 Hz), 111.2, 114.5, 115.6 (d, *J* = 20.0 Hz), 120.1, 123.9 (d, *J* = 3.6 Hz), 124.8, 129.0, 129.2, 129.3, 129.6, 130.2, 130.5, 131.0 (d, *J* = 8.0 Hz), 133.7, 135.1, 136.4, 140.3, 145.5, 163.0 (d, *J* = 253.0 Hz), 171.1; <sup>19</sup>F NMR (470 MHz, CDCl<sub>3</sub>) δ -108.5; IR (neat) ν 3309, 1723, 1589, 1314, 1177, 811, 751 cm<sup>-1</sup>; HRMS (ESI-TOF) calcd for C<sub>29</sub>H<sub>17</sub>Cl<sub>5</sub>FN<sub>2</sub>O [M+H]<sup>+</sup> 602.9762, found: 602.9768; HPLC: Phenomenex Lux Cellulose-1, hexane:2-propanol 80:20, 1 mL/min, λ = 254 nm, *t*<sub>R</sub> (major) = 11.2 min, *t*<sub>R</sub> (minor) = 19.6 min.

**(S)-3-(3-((Tert-butyldimethylsilyloxy)prop-1-yn-1-yl)-5-chloro-1-(2,6-dichlorobenzyl)-3-((3,5-dichlorophenyl)amino)indolin-2-one (9i).** This compound was obtained from **6o** (0.1 mmol, 50 mg). White solid, yield: 63 mg, 93%; m.p. 169-171 °C;  $[\alpha]_D^{25} = -14.5$  (c 0.8, CH<sub>2</sub>Cl<sub>2</sub>, 90% ee); <sup>1</sup>H NMR (500 MHz, CDCl<sub>3</sub>) δ 0.05 (s, 3H), 0.06 (s, 3H), 0.86 (s, 9H), 4.33 (s, 2H), 4.65 (s, 1H), 5.18 (d,

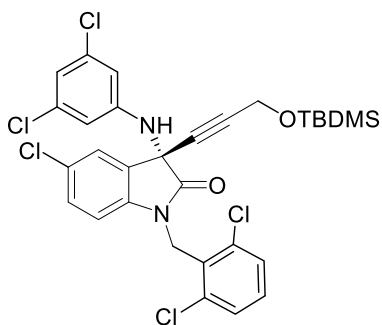

$J = 15.2$  Hz, 1H), 5.28 (d,  $J = 15.2$  Hz, 1H), 6.46 (d,  $J = 1.7$  Hz, 2H), 6.72 (d,  $J = 8.5$  Hz, 1H), 6.76 (t,  $J = 1.7$  Hz, 1H), 7.20-7.26 (m, 2H), 7.36 (d,  $J = 8.1$  Hz, 2H), 7.39 (d,  $J = 2.2$  Hz, 1H);  $^{13}\text{C}$  NMR (126 MHz,  $\text{CDCl}_3$ )  $\delta$  -5.2, -5.2, 25.7, 40.8, 51.6, 58.2, 79.6, 85.6, 111.2, 114.1, 119.9, 124.7, 129.0, 129.1, 129.4, 129.5, 130.2, 130.4, 135.1, 136.4, 139.9, 145.5, 171.2; IR (neat)  $\nu$  3306, 1720, 1593, 1257, 1070, 774  $\text{cm}^{-1}$ ; HRMS (ESI-TOF)

calcd for  $\text{C}_{30}\text{H}_{29}\text{Cl}_5\text{N}_2\text{NaO}_2\text{Si}$   $[\text{M}+\text{Na}]^+$  675.0333, found 675.0331; HPLC: Phenomenex Lux i-Amylose-3, hexane:2-propanol 60:40, 1 mL/min,  $\lambda = 254$  nm,  $t_R$  (major) = 16.8 min,  $t_R$  (minor) = 10.5 min.

**(S)-1-(2,6-Dichlorobenzyl)-3-((3,5-dichlorophenyl)amino)-3-((2-fluorophenyl)ethynyl)-5-methylindolin-2-one (9j)**. This compound was obtained from **6q** (0.1 mmol, 46 mg). White solid,

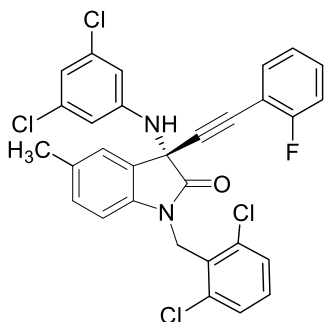

yield: 57 mg, 98%; m.p. 226-228 °C;  $[\alpha]_D^{25} = +30.3$  (c 0.6,  $\text{CH}_2\text{Cl}_2$ , 94% ee);  $^1\text{H}$  NMR (500 MHz,  $\text{CDCl}_3$ )  $\delta$  2.31 (s, 3H), 4.70 (s, 1H), 5.19 (d,  $J = 15.2$  Hz, 1H), 5.34 (d,  $J = 15.2$  Hz, 1H), 6.66-6.68 (3H), 6.78 (t,  $J = 1.7$  Hz, 1H), 7.04-7.09 (m, 3H), 7.22 (m, 1H), 7.29-7.34 (m, 2H), 7.35 (d,  $J = 8.0$  Hz, 2H), 7.40 (td,  $J_1 = 7.4$  Hz,  $J_2 = 1.7$  Hz, 1H);  $^{13}\text{C}$  NMR (126 MHz,  $\text{CDCl}_3$ )  $\delta$  21.0, 40.7, 58.8, 79.9, 89.5, 110.0, 110.3 (d,  $J = 15.7$  Hz), 114.5, 115.5 (d,  $J = 20.5$  Hz), 119.7, 123.8,

125.0, 128.0, 128.8, 129.9 (d,  $J = 10.6$  Hz), 130.7 (d,  $J = 8.0$  Hz), 130.9, 133.5, 133.7, 135.0, 136.4, 139.1, 145.9, 163.0 (d,  $J = 253.0$  Hz), 171.5;  $^{19}\text{F}$  NMR (470 MHz,  $\text{CDCl}_3$ )  $\delta$  -108.7; IR (neat)  $\nu$  3316, 1703, 1579, 1492, 1432, 1090, 986, 808, 751  $\text{cm}^{-1}$ ; HRMS (ESI-TOF) calcd for  $\text{C}_{30}\text{H}_{20}\text{Cl}_4\text{FN}_2\text{O}$   $[\text{M}+\text{H}]^+$  583.0308, found 583.0319; HPLC: Phenomenex Lux Cellulose-1, hexane:2-propanol 80:20, 1 mL/min,  $\lambda = 254$  nm,  $t_R$  (major) = 9.7 min,  $t_R$  (minor) = 16.4 min.

**(S)-3-(3-((Tert-butyldimethylsilyl)oxy)prop-1-yn-1-yl)-1-(2,6-dichlorobenzyl)-3-((3,5-dichlorophenyl)amino)-5-methylindolin-2-one (9k)**. This compound was obtained from **6q** (0.1

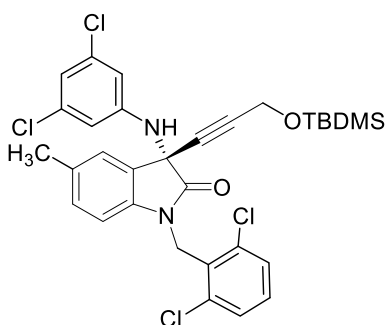

mmol, 45 mg). Colorless oil, yield: 59 mg, 96%;  $[\alpha]_D^{25} = -19.3$  (c 0.9,  $\text{CH}_2\text{Cl}_2$ , 98% ee);  $^1\text{H}$  NMR (500 MHz,  $\text{CDCl}_3$ )  $\delta$  0.05 (s, 3H), 0.06 (s, 3H), 0.86 (s, 9H), 2.28 (s, 3H), 4.33 (s, 2H), 4.64 (s, 1H), 5.17 (d,  $J = 15.1$  Hz, 1H), 5.27 (d,  $J = 15.1$  Hz, 1H), 6.52 (d,  $J = 1.7$  Hz, 2H), 6.66 (d,  $J = 8.1$  Hz, 1H), 6.74 (t,  $J = 1.7$  Hz, 1H), 7.03 (d,  $J = 7.1$  Hz, 1H), 7.20-7.23 (2H), 7.34 (d,  $J = 8.0$  Hz, 2H);  $^{13}\text{C}$  NMR (126 MHz,  $\text{CDCl}_3$ )  $\delta$  -5.2, -5.2, 18.1, 25.7, 40.7,

51.7, 58.3, 80.3, 85.0, 109.9, 114.2, 119.5, 124.9, 127.8, 128.9, 129.9, 130.7, 133.3, 135.0, 136.4, 139.0, 145.9, 171.6; IR (neat)  $\nu$  3319, 1720, 1586, 1499, 1442, 1257, 1086, 831, 771  $\text{cm}^{-1}$ ; HRMS (ESI-TOF) calcd for  $\text{C}_{31}\text{H}_{32}\text{Cl}_4\text{N}_2\text{NaO}_2\text{Si}$   $[\text{M}+\text{Na}]^+$  655.0879, found 655.0873; HPLC: Phenomenex Lux i-Amylose-3, hexane:2-propanol 60:40, 1 mL/min,  $\lambda$  = 254 nm,  $t_R$  (major) = 13.7 min,  $t_R$  (minor) = 23.8 min.

**(S)-1-(2,6-Dichlorobenzyl)-3-((3,5-dichlorophenyl)amino)-3-((2-fluorophenyl)ethynyl)-7-**

**methylindolin-2-one (4l).** This compound was obtained from **1t** (0.1 mmol, 45 mg). White solid;

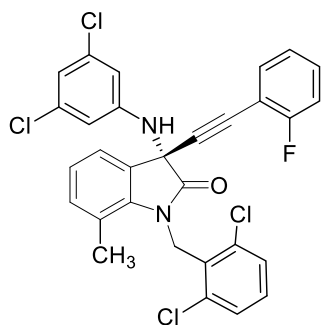

yield: 54 mg, 95%; m.p. 205-206 °C;  $[\alpha]_D^{25} = -57.4$  (c 0.7,  $\text{CH}_2\text{Cl}_2$ , 98% ee);  $^1\text{H}$  NMR (500 MHz,  $\text{CDCl}_3$ )  $\delta$  2.45 (s, 3H), 4.54 (s, 1H), 5.41 (d,  $J = 16.0$  Hz, 1H), 5.52 (d,  $J = 16.0$  Hz, 1H), 6.71 (d,  $J = 1.7$  Hz, 2H), 6.77 (t,  $J = 1.7$  Hz, 1H), 7.01-7.08 (3H), 7.13 (m, 1H), 7.16 (d,  $J = 7.9$  Hz, 1H), 7.28-7.32 (m, 3H), 7.36 (td,  $J = 7.5, 1.7$  Hz, 1H), 7.41 (d,  $J = 7.3$  Hz, 1H);  $^{13}\text{C}$  NMR (126 MHz,  $\text{CDCl}_3$ )  $\delta$  19.4, 43.7, 43.8, 58.3, 80.2, 89.3, 110.3 (d,  $J = 15.7$  Hz), 115.1, 115.5 (d,  $J = 20.7$  Hz), 119.9,

120.8, 122.5, 123.8, 123.9 (d,  $J = 3.8$  Hz), 129.0, 129.1, 130.7 (d,  $J = 7.8$  Hz), 131.2, 133.7, 134.5, 134.8, 135.4, 140.6, 145.8, 162.9 (d,  $J = 253.3$  Hz), 172.6;  $^{19}\text{F}$  NMR (470 MHz,  $\text{CDCl}_3$ )  $\delta$  -108.8; IR (neat)  $\nu$  3315, 1721, 1590, 1445, 782, 746, 739  $\text{cm}^{-1}$ ; HRMS (ESI-TOF) calcd for  $\text{C}_{30}\text{H}_{20}\text{Cl}_4\text{FN}_2\text{O}$   $[\text{M}+\text{H}]^+$  583.0308, found 583.0321; HPLC: Phenomenex Lux Cellulose-1, hexane:2-propanol 80:20, 1 mL/min,  $\lambda$  = 254 nm,  $t_R$  (major) = 16.8 min,  $t_R$  (minor) = 19.4 min.

**(S)-3-(3-((Tert-butyldimethylsilyloxy)prop-1-yn-1-yl)-1-(2,6-dichlorobenzyl)-3-((3,5-**

**dichlorophenyl)amino)-7-methylindolin-2-one (4m).** This compound was obtained from **1t** (0.1

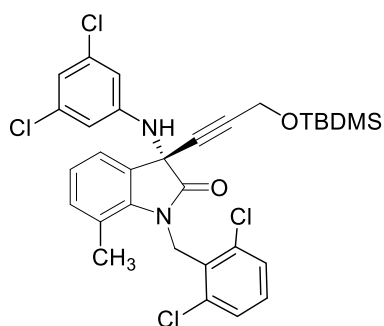

mmol, 46 mg). Colorless oil, yield: 60 mg, 95%;  $[\alpha]_D^{25} = -13.2$  (c 1.0,  $\text{CH}_2\text{Cl}_2$ , 90% ee).  $^1\text{H}$  NMR (500 MHz,  $\text{CDCl}_3$ )  $\delta$  0.03 (s, 6H), 0.85 (s, 9H), 2.47 (s, 3H), 4.29 (s, 2H), 4.46 (s, 1H), 5.37 (d,  $J = 15.8$  Hz, 1H), 5.46 (d,  $J = 15.8$  Hz, 1H), 6.55 (d,  $J = 1.8$  Hz, 2H), 6.73 (t,  $J = 1.8$  Hz, 1H), 7.03 (t,  $J = 7.6$  Hz, 1H), 7.12 (m, 1H), 7.15 (d,  $J = 7.7$  Hz, 1H), 7.28 (d,  $J = 8.1$  Hz, 2H), 7.31 (d,  $J = 8.2$  Hz, 1H);  $^{13}\text{C}$  NMR (126 MHz,  $\text{CDCl}_3$ )  $\delta$  -5.2, 19.5, 25.7,

43.8, 51.6, 57.8, 80.0, 85.1, 114.8, 119.8, 120.7, 122.4, 123.6, 128.8, 128.9, 129.1, 131.2, 134.4, 134.8, 135.5, 140.5, 145.8, 172.7; IR (neat)  $\nu$  3312, 1718, 1590, 1306, 1251, 1076, 786, 771  $\text{cm}^{-1}$ ; HRMS (ESI-TOF) calcd for  $\text{C}_{31}\text{H}_{32}\text{Cl}_4\text{N}_2\text{NaO}_2\text{Si}$   $[\text{M}+\text{Na}]^+$  655.0879, found 655.0892. HPLC: Phenomenex Lux i-Amylose-3, hexane:2-propanol 60:40, 1 mL/min,  $\lambda$  = 254 nm,  $t_R$  (major) = 16.1 min,  $t_R$  (minor) = 7.6 min.

**7. Scaled-Up Version of the Reaction of Enantioselective Addition of Terminal Alkynes to Isatin-Derived Ketimines.** To a solution 1.2 M of ZnMe<sub>2</sub> in toluene (10 mmol, 8.3 mL) under nitrogen atmosphere was added phenylacetylene (10 mmol, 1.1 mL) and the mixture was stirred at rt for 1 h. Then, a solution 0.1 M of ligand **L2** in toluene (0.5 mmol, 5 mL, 20 mol%) was added and the reaction stirred for another 30 min, whereupon a solution of the imine **6g** (1.13 g, 2.5 mmol) in CH<sub>2</sub>Cl<sub>2</sub> (25 mL) was added dropwise and the reaction stirred at rt for 24 h. The reaction was quenched with NH<sub>4</sub>Cl, extracted with CH<sub>2</sub>Cl<sub>2</sub>, dried over MgSO<sub>4</sub>, filtered and concentrated. Purification in column chromatography (hexane/CH<sub>2</sub>Cl<sub>2</sub> 3:1 to 1:2) afforded the pure product **7g** (1.18 g, 85% yield) with an enantioselectivity of er = 98:2.

**8. General Procedure for the Synthesis of Racemic 3-Alkynyl-3-Aminooxindoles .** To a solution of ZnMe<sub>2</sub> in toluene (1.2 M, 0.4 mmol) under nitrogen atmosphere was added the corresponding alkyne (0.4 mmol) and the mixture was stirred at rt for 1 h. Then, a solution of the imine (0.1 mmol) in CH<sub>2</sub>Cl<sub>2</sub> (1 mL) was added dropwise and the reaction stirred at rt for 48 h. The reaction was quenched with NH<sub>4</sub>Cl, extracted with CH<sub>2</sub>Cl<sub>2</sub>, dried over MgSO<sub>4</sub>, filtered and concentrated. Purification in column chromatography (hexane/ CH<sub>2</sub>Cl<sub>2</sub> 3/1 to 1/2) afforded the pure products.

## 9. References

1. B. Trost, J. Xie, J. D. Sieber, *J. Am. Chem. Soc.* 2011, **133**, 20611
2. K. Aikawa, S. Mimura, Y. Numata, K. Mikami, *Eur. J. Org. Chem.* 2011, **1**, 62.
3. R. He, S. Wu, H. Tang, X. Huo, Z. Sun, W. Zhang, *Org. Lett.* 2018, **20**, 6183
4. R. Shintani, K. Takatsu, T. Hayashi, *Chem. Commun.* 2010, **46**, 6822.
5. Y. Liu, J. Xue, Z. Sun, D. Liu, Y. Xing, Y. Li, *Asian J. Org. Chem.* 2016, **5**, 43
6. L. Zhang, H. Lu, G. Xu, Z. Whang, P. Xu, *J. Org. Chem.* 2017, **82**, 5782.
7. T. Itoh, H. Ishikawa, Y. Hayashi, *Org. Lett.* 2009, **11**, 3854.
8. S. Žari, M. Kudrjashova, T. Pehk, M. Lopp, T. Kanger, *Org. Lett.* **2014**, *16*, 1740-1743.
9. G. Huang, Z. Yin, X. Zhang, *Chem Eur J.* **2013**, *19*, 11992-11998
10. F. Pagliai, T. Pirali, E. Del Grosso, R. Di Brisco, G. C. Tron, G. Sorba, A. A. Genazzani, *J. Med. Chem.* **2006**, *49*, 467-470.

### 10. Copies of $^1\text{H}$ -NMR and $^{13}\text{C}$ -NMR Spectra.

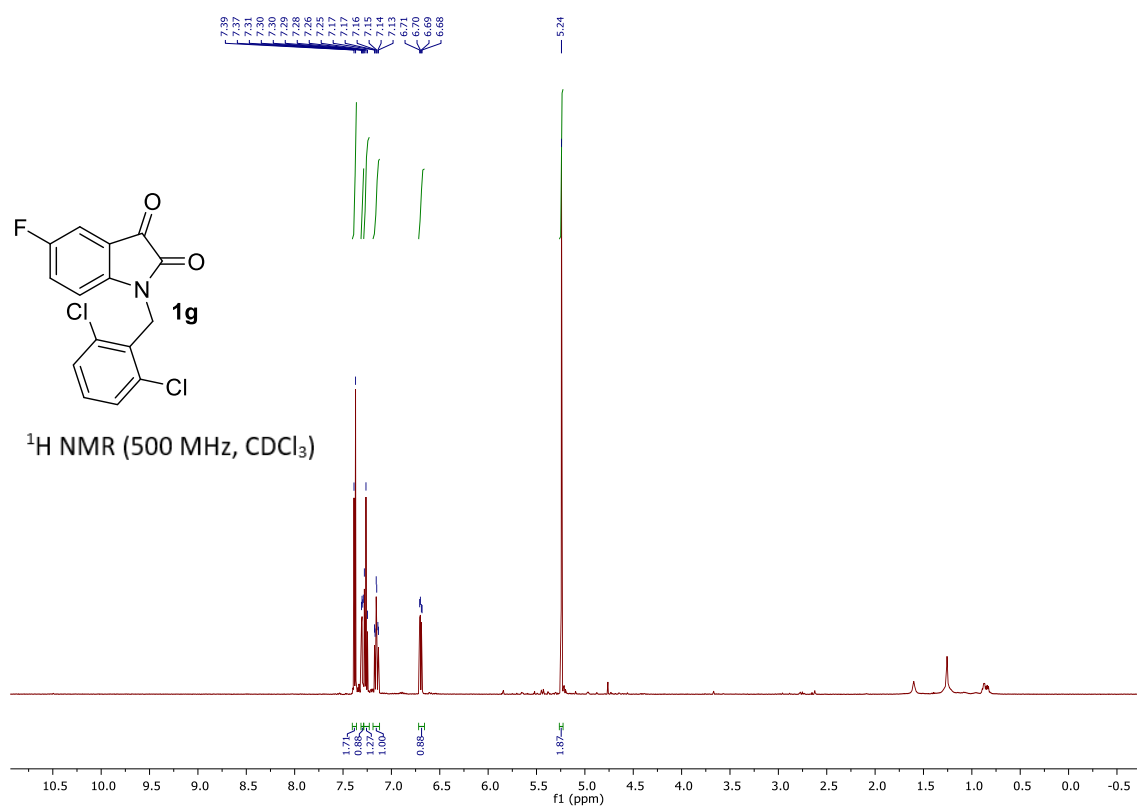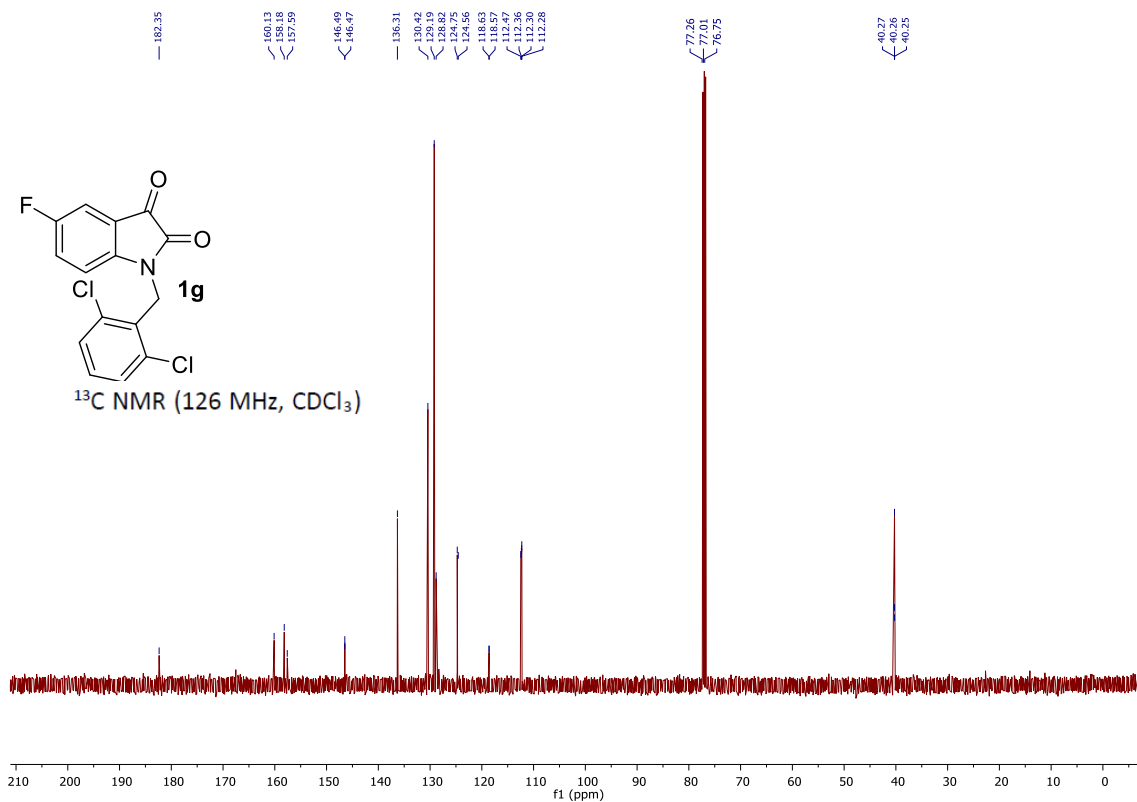



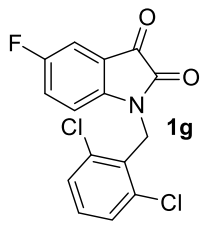

$^{19}\text{F}$  NMR (470 MHz,  $\text{CDCl}_3$ )

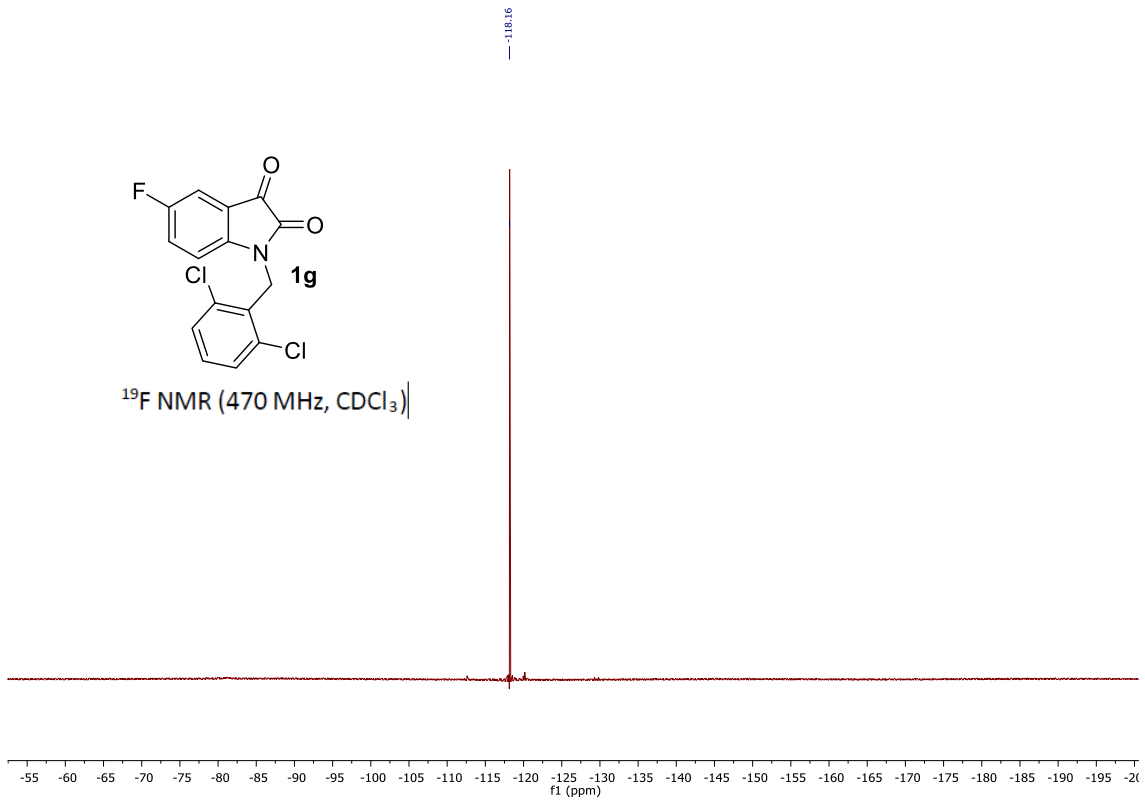

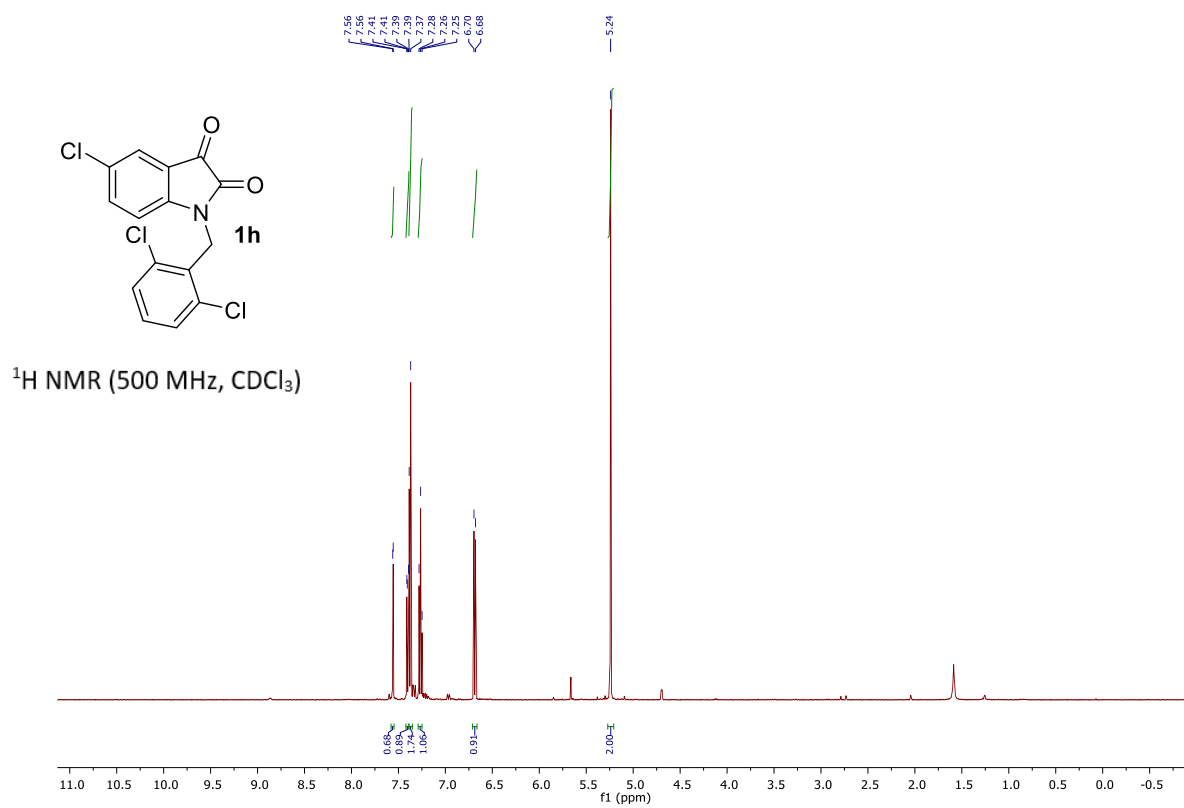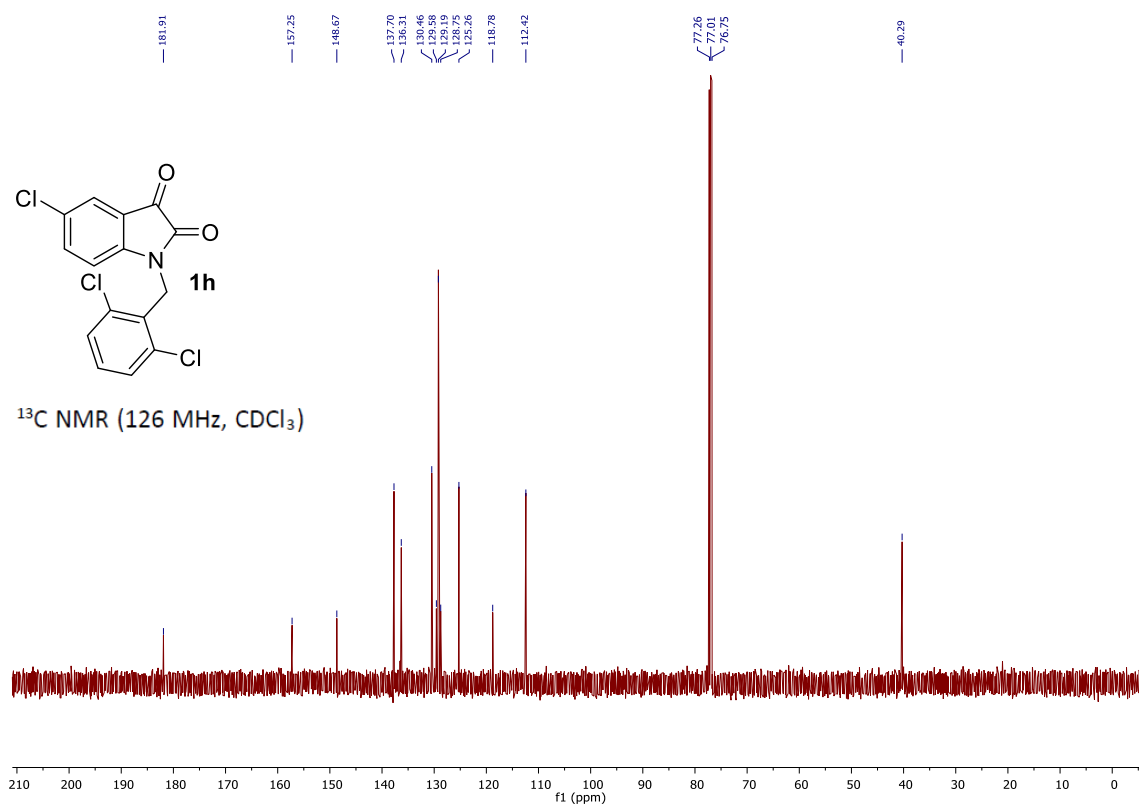

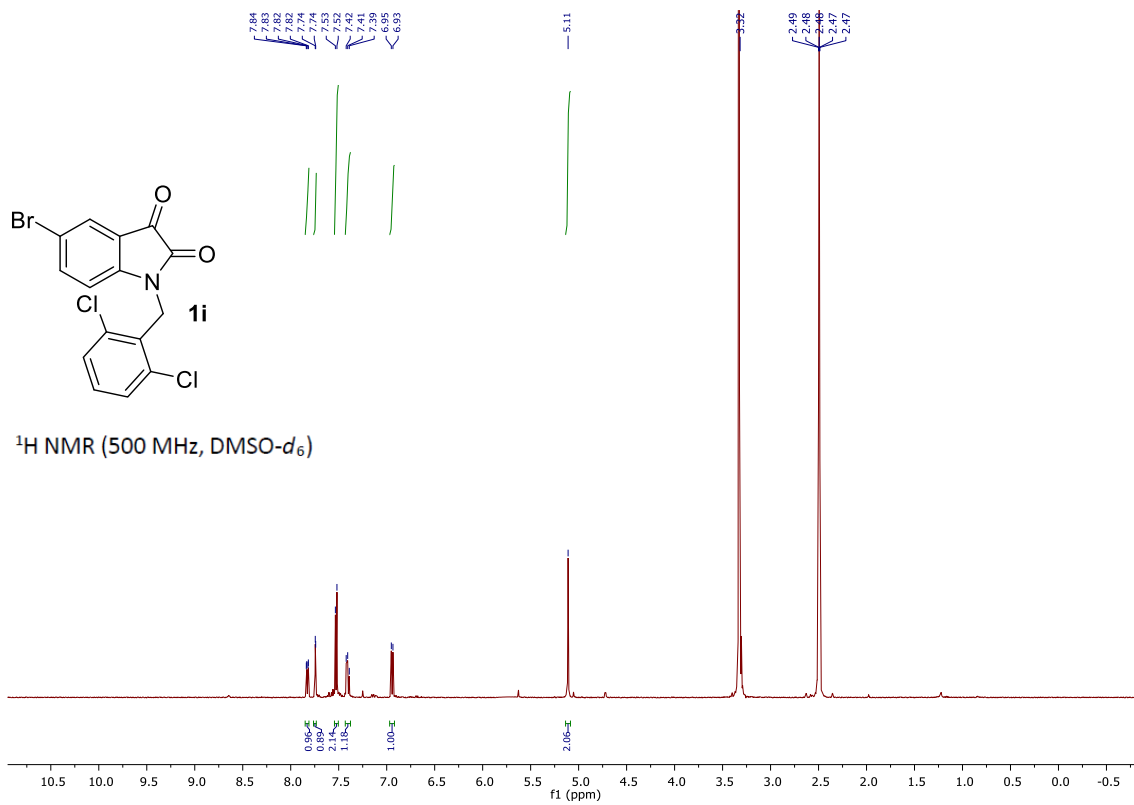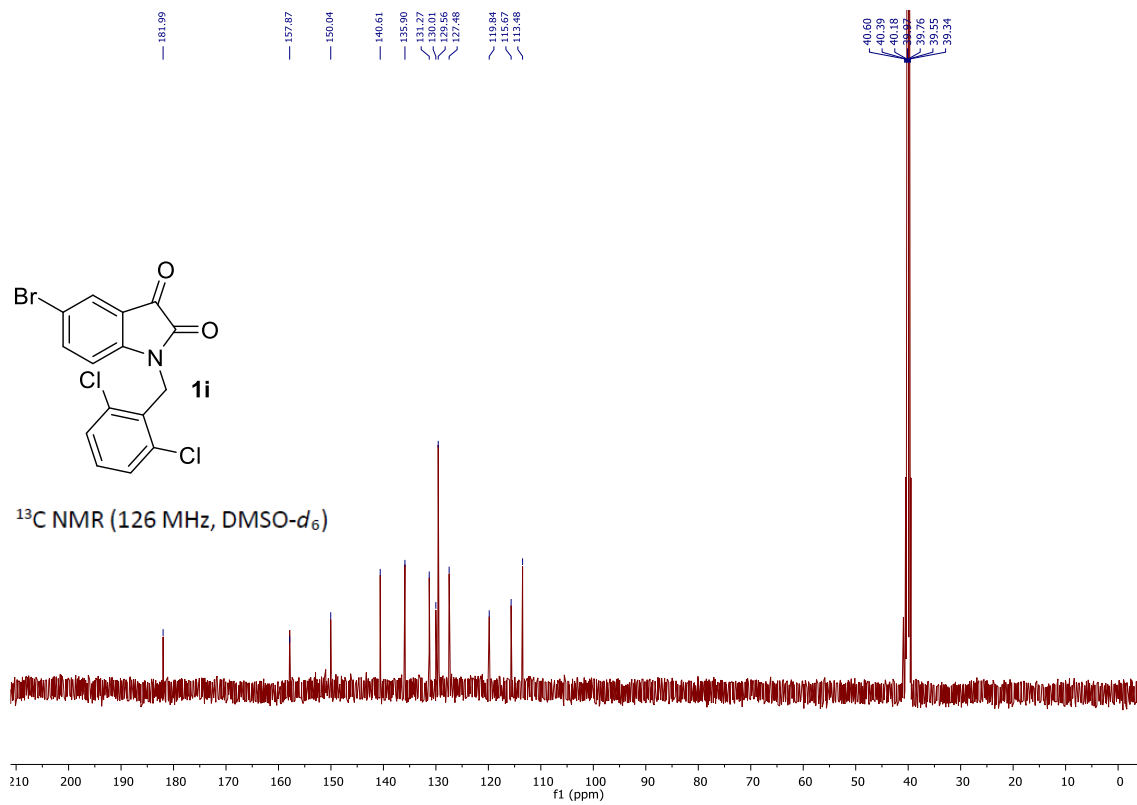

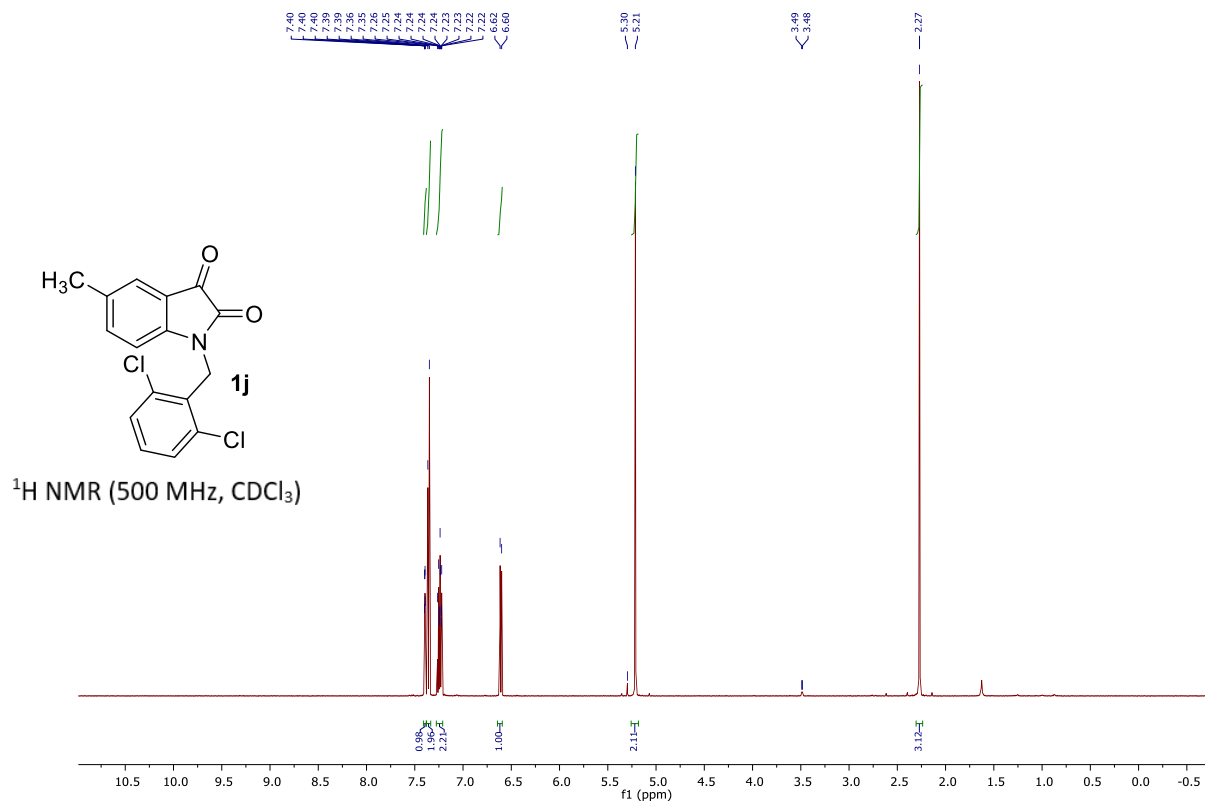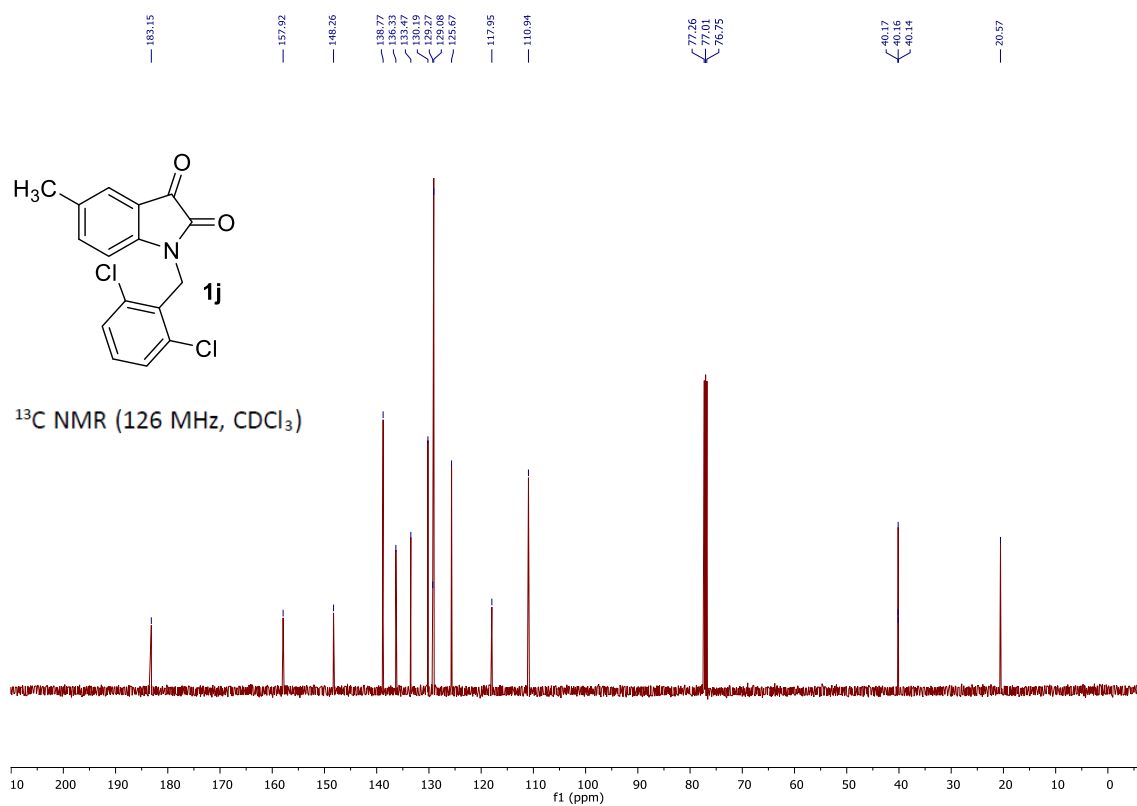

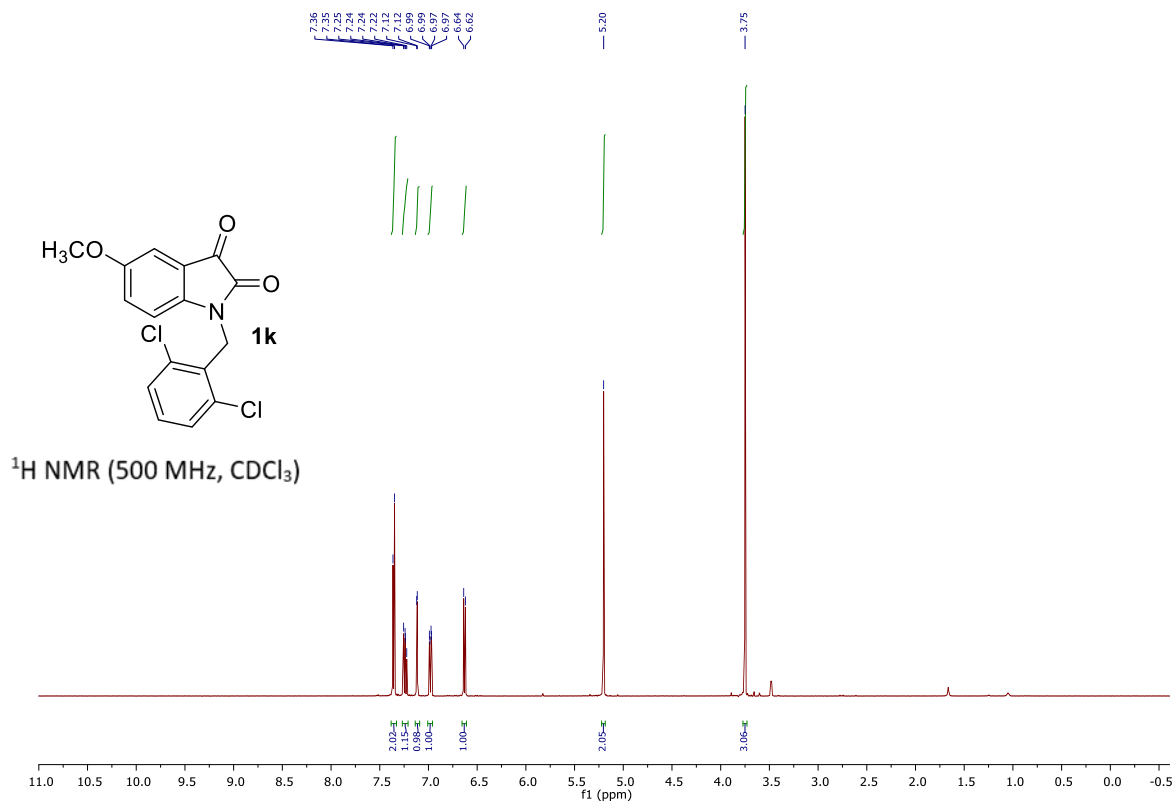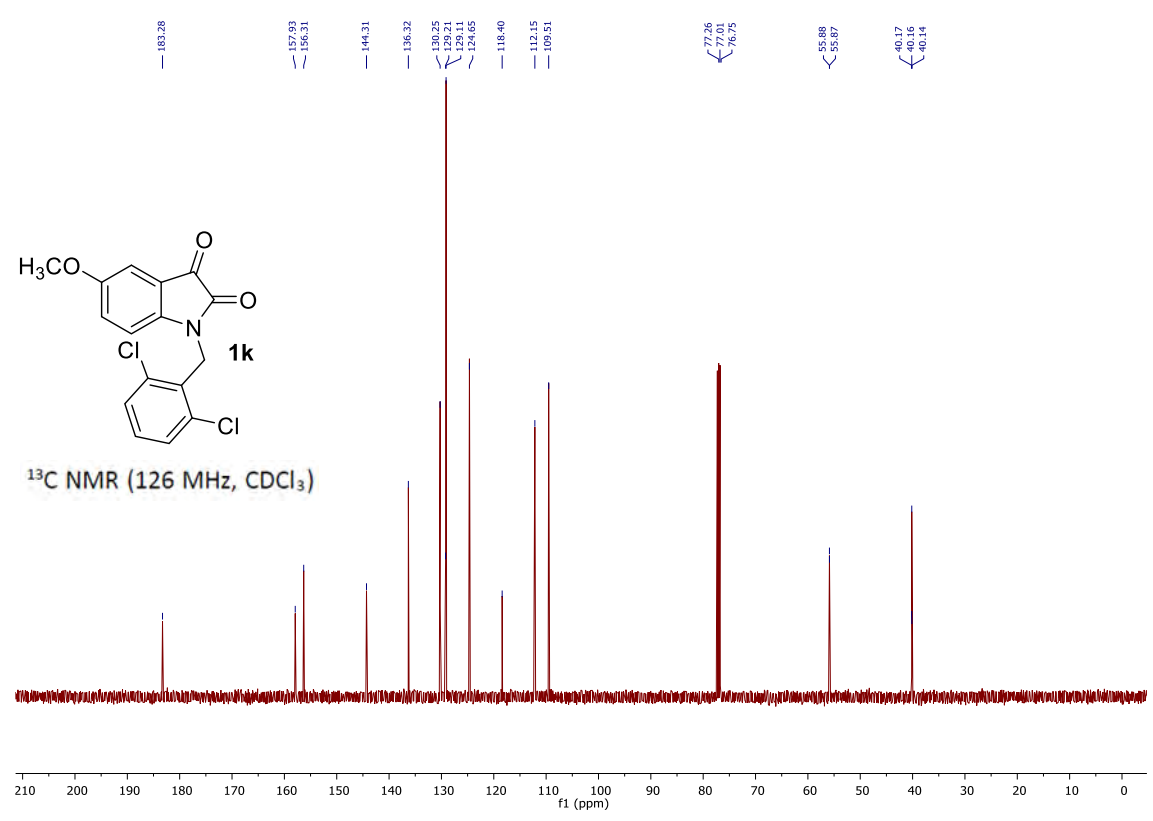

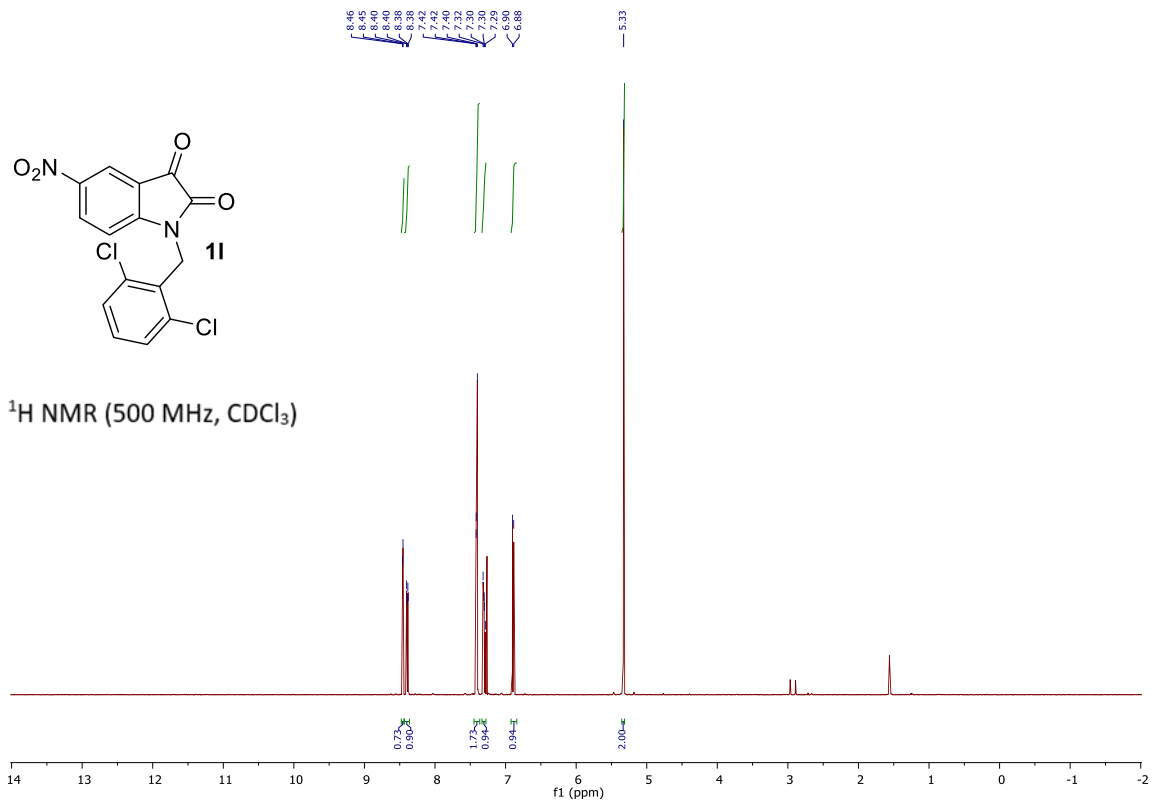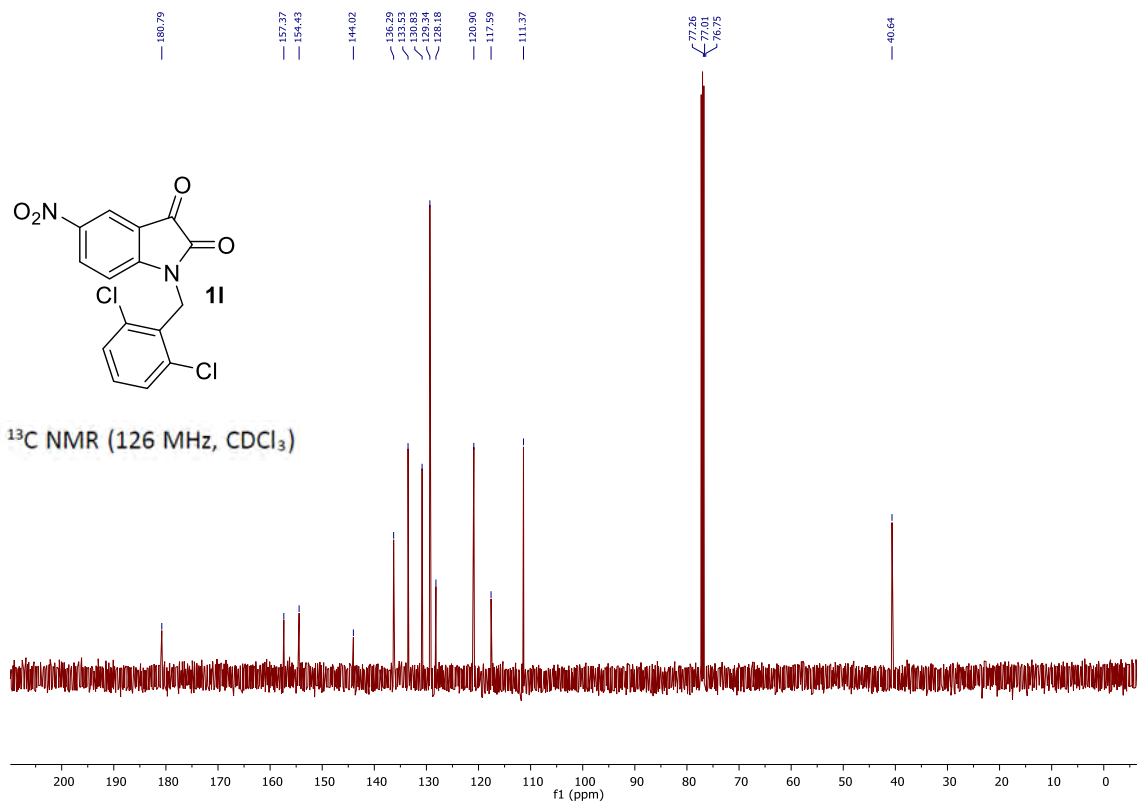

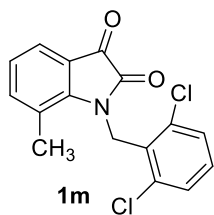

<sup>1</sup>H NMR (500 MHz, CDCl<sub>3</sub>)

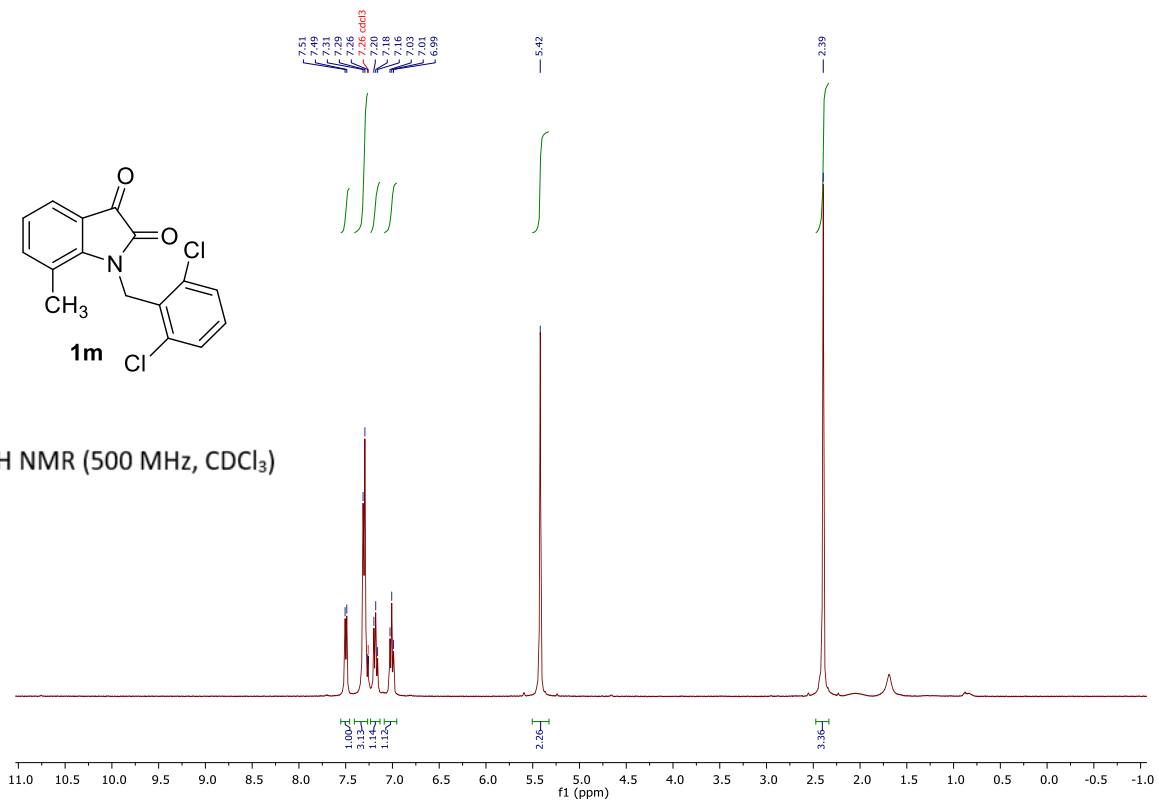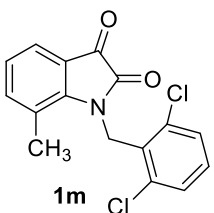

<sup>13</sup>C NMR (126 MHz, CDCl<sub>3</sub>)

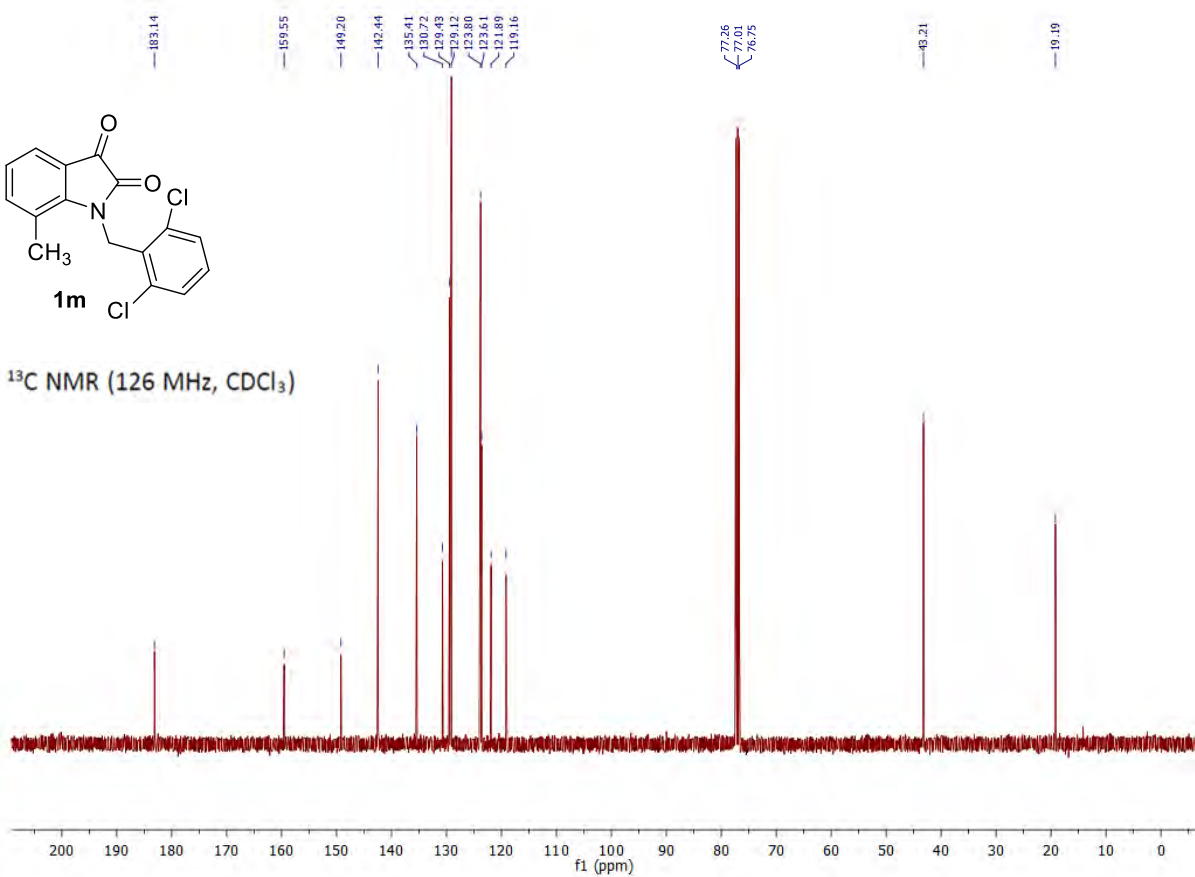

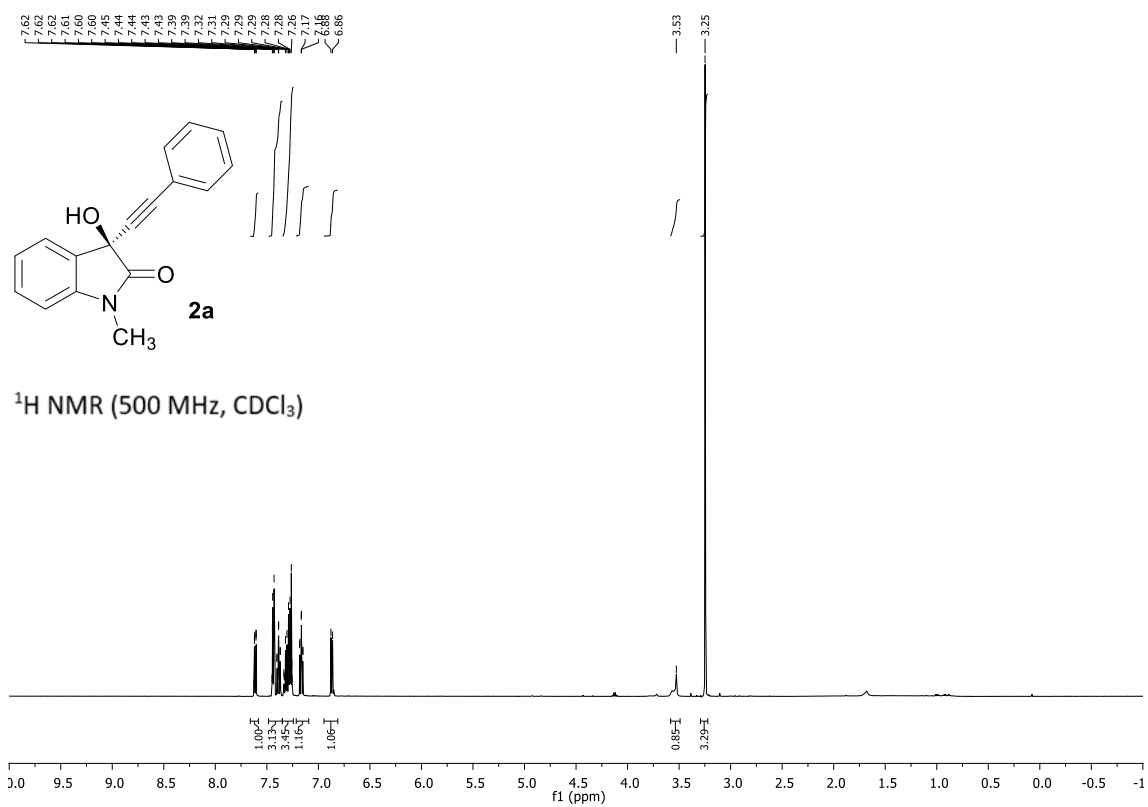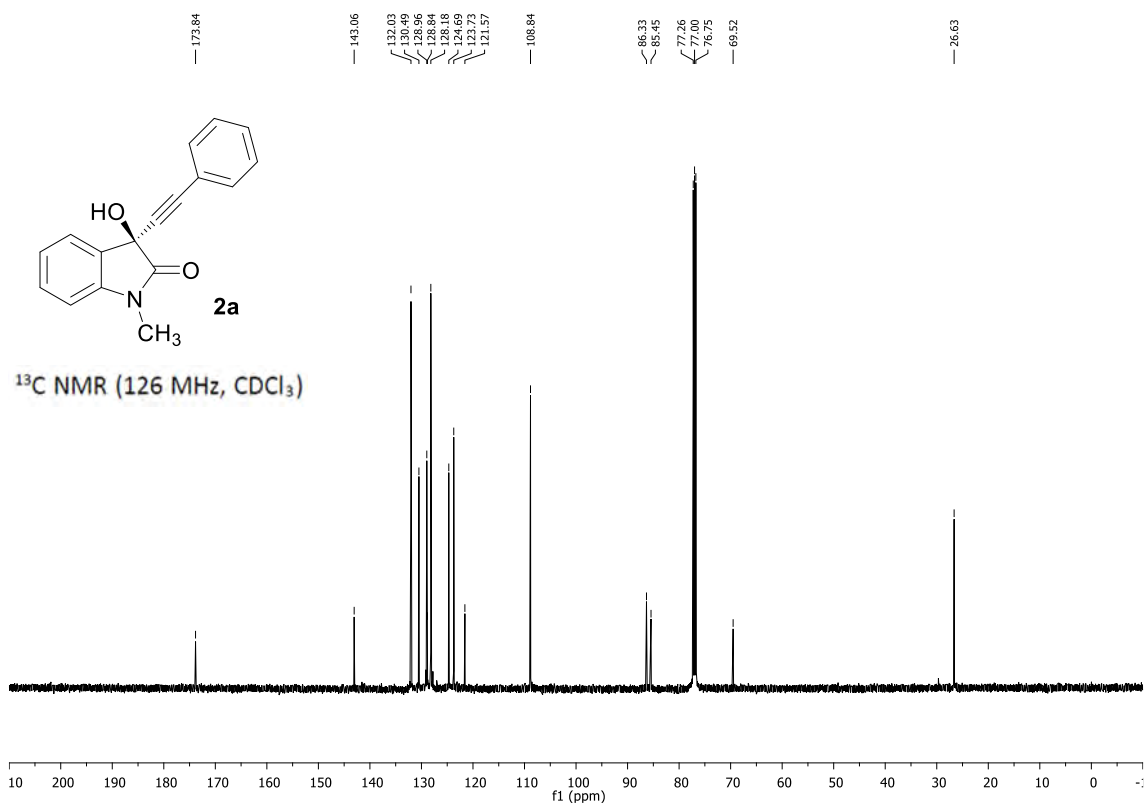



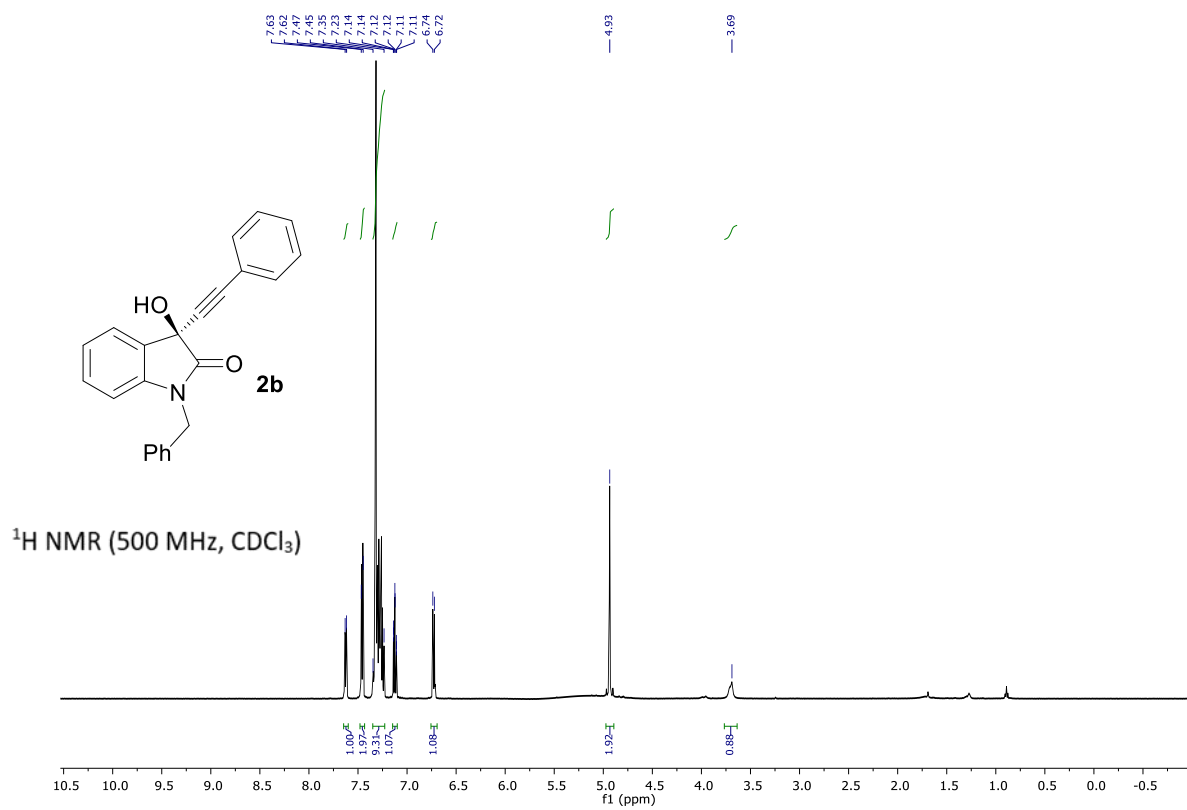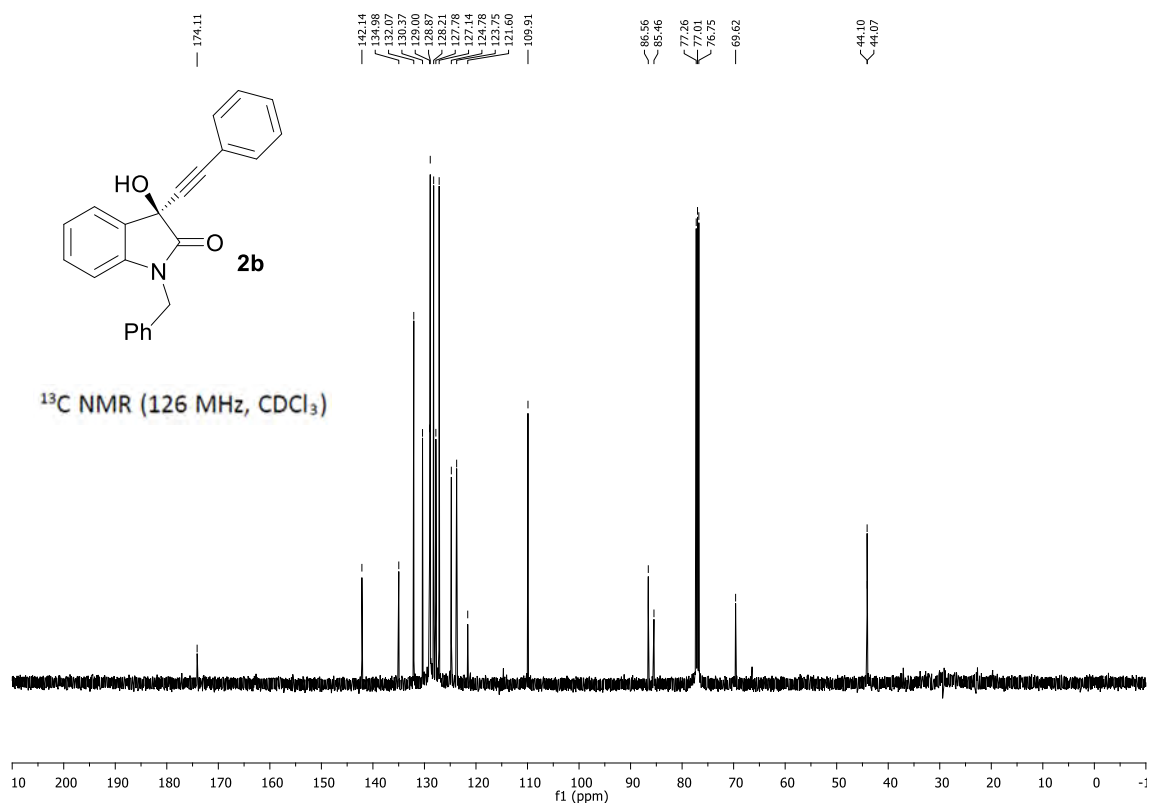

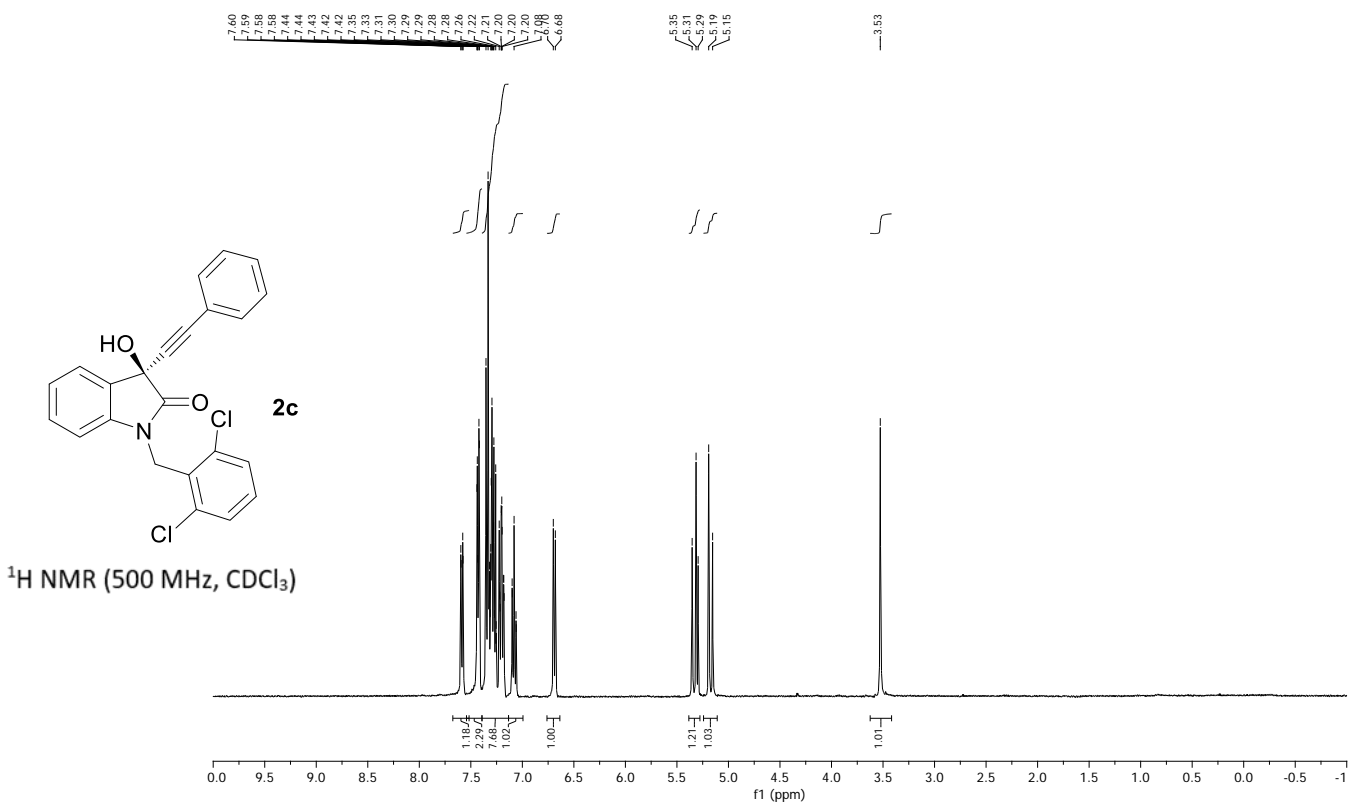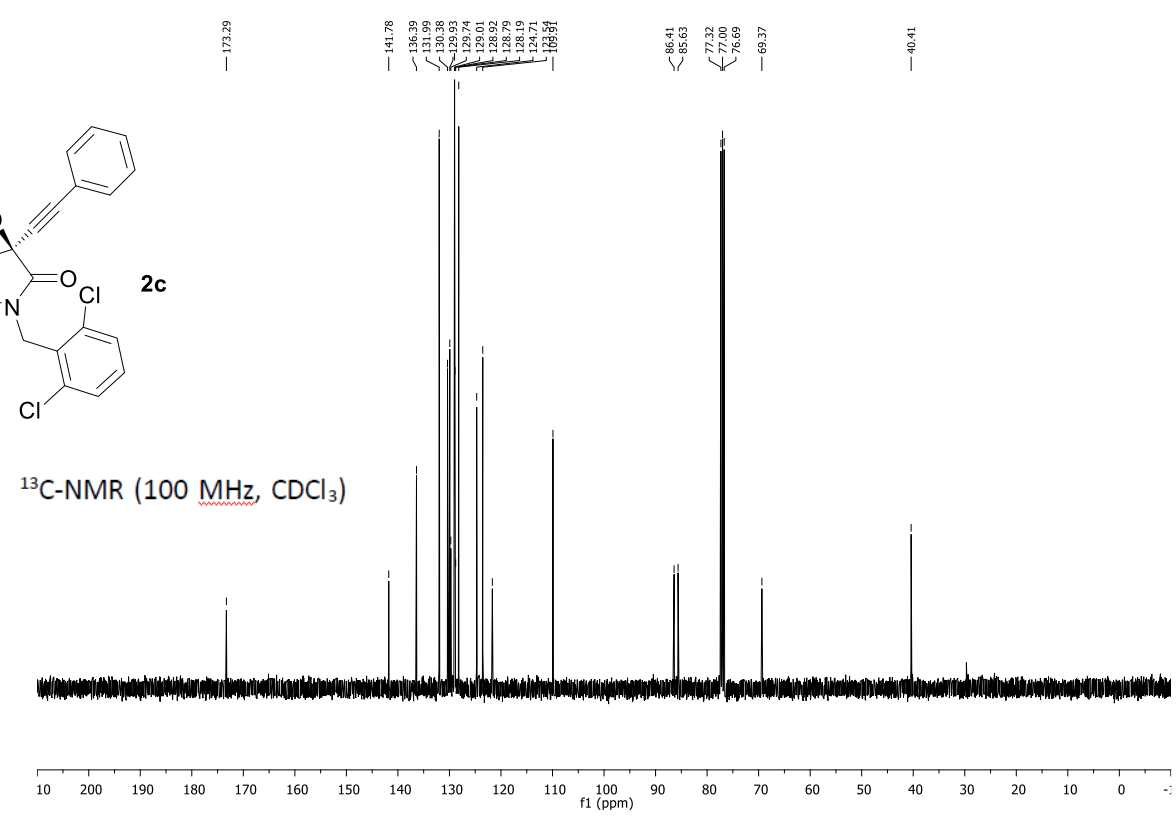

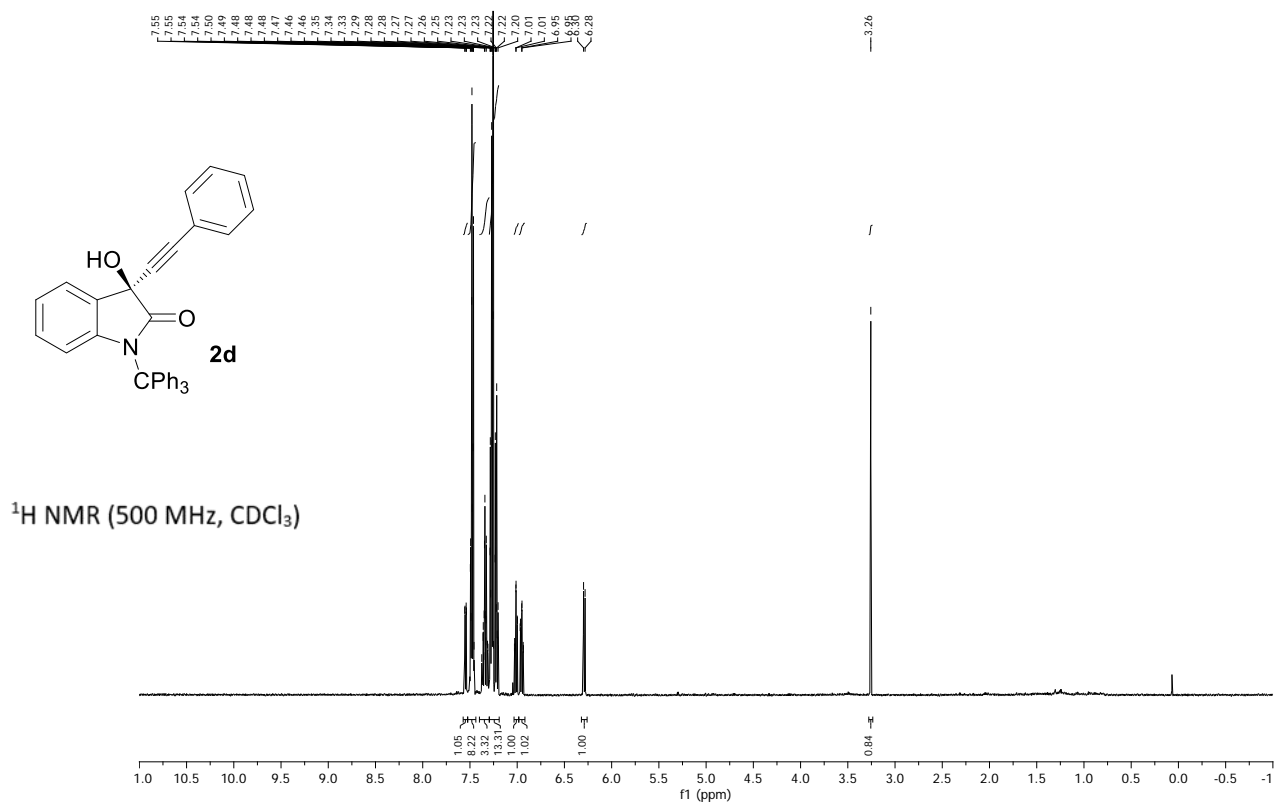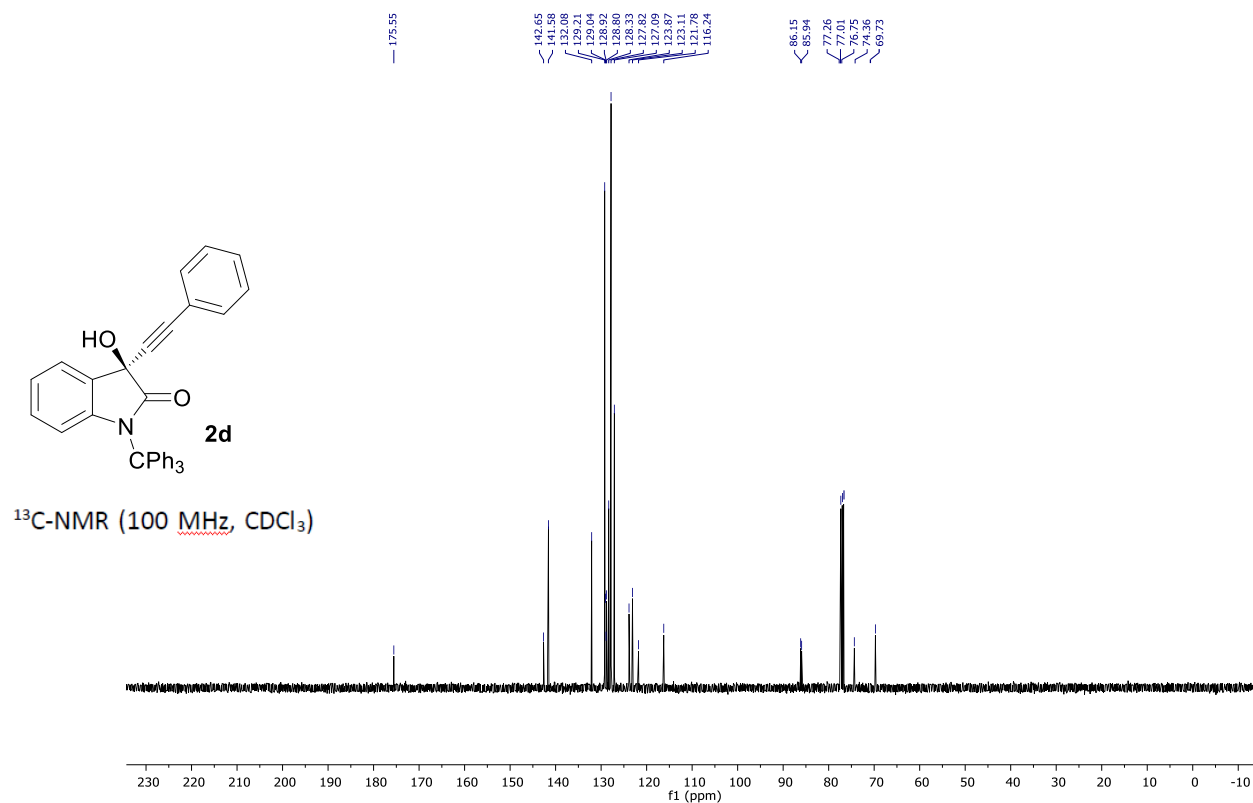

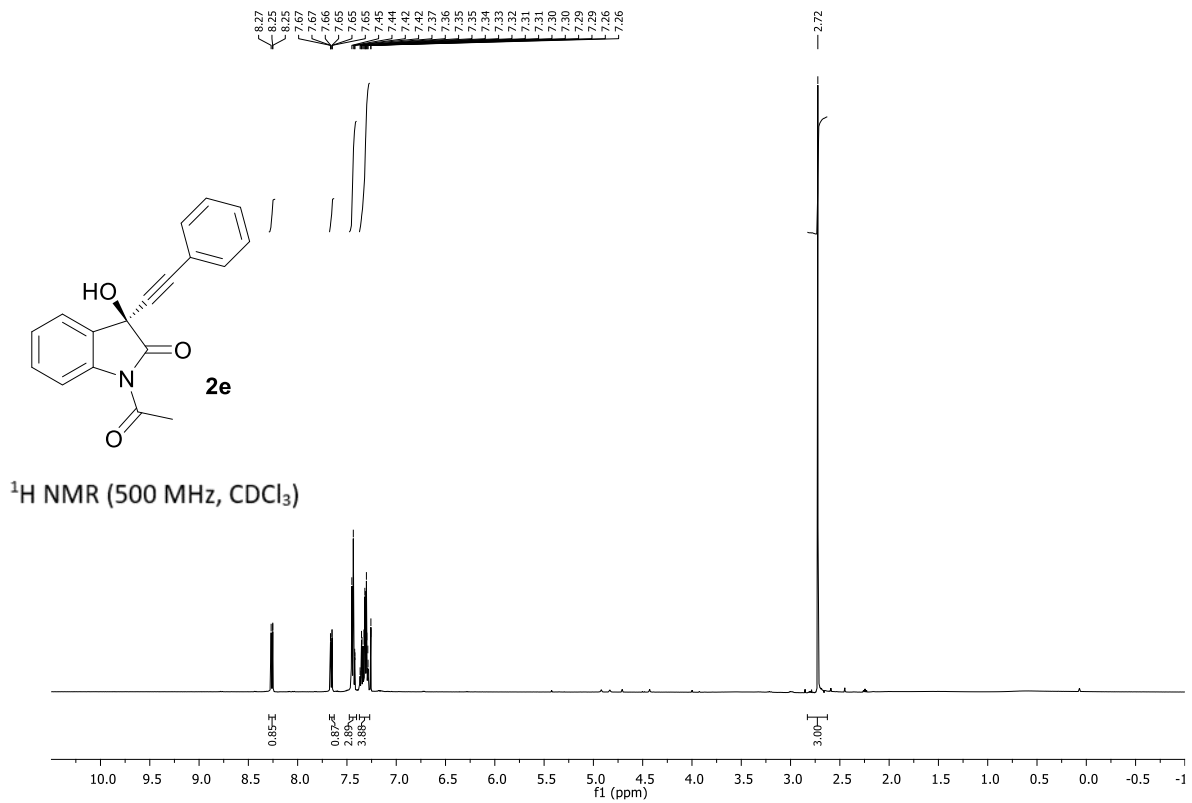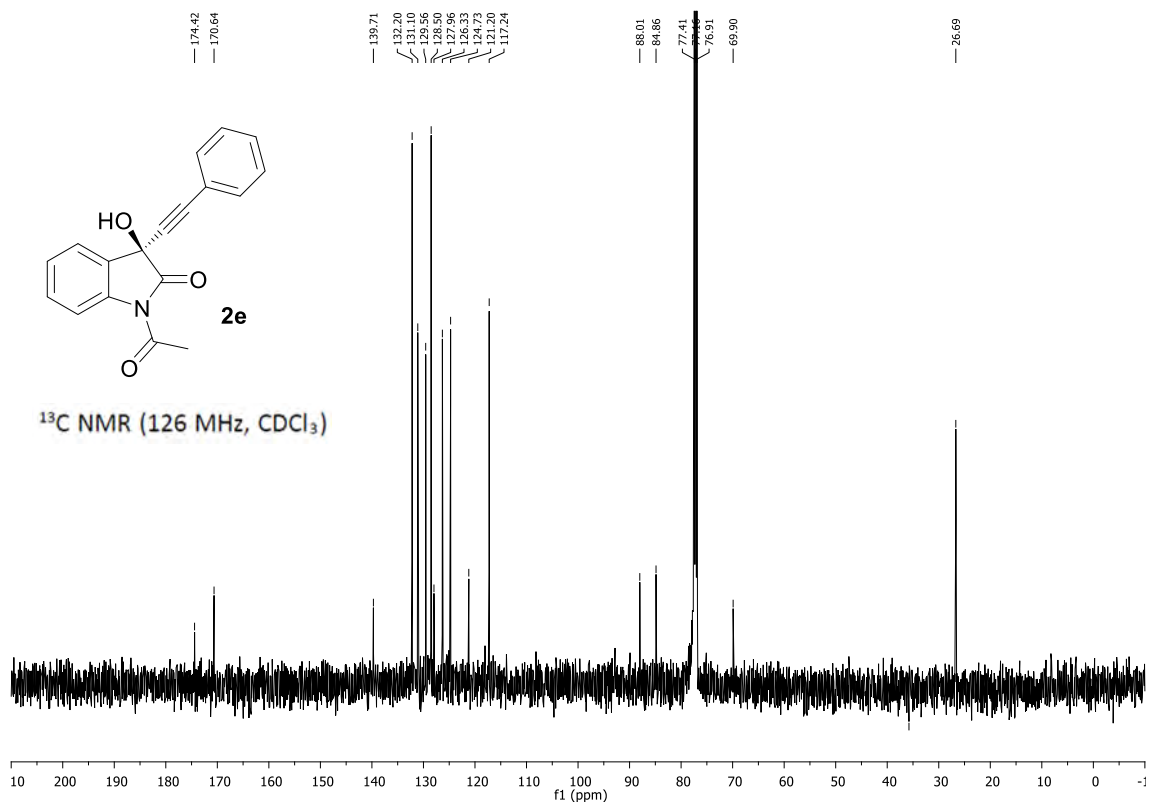

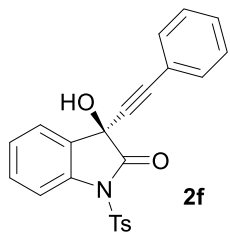

$^1\text{H NMR}$  (500 MHz,  $\text{CDCl}_3$ )

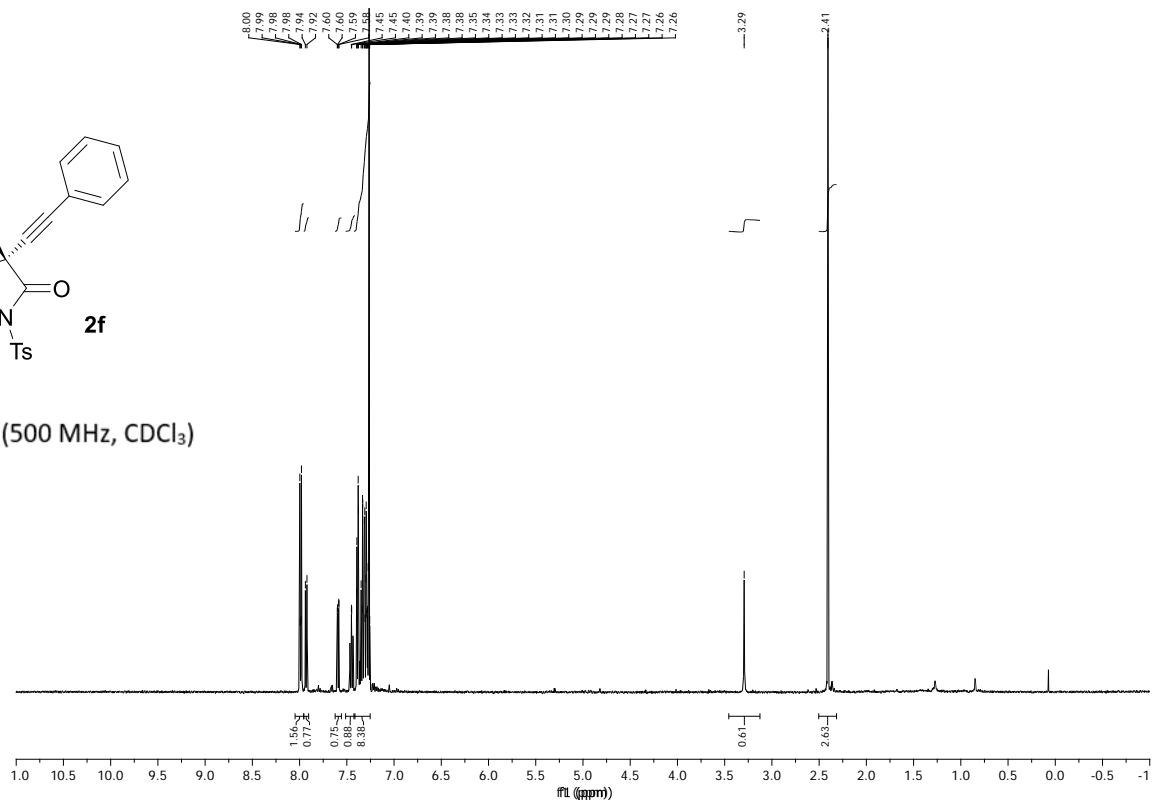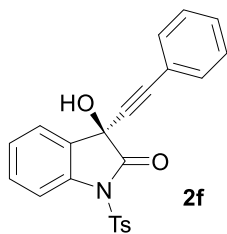

$^{13}\text{C NMR}$  (126 MHz,  $\text{CDCl}_3$ )

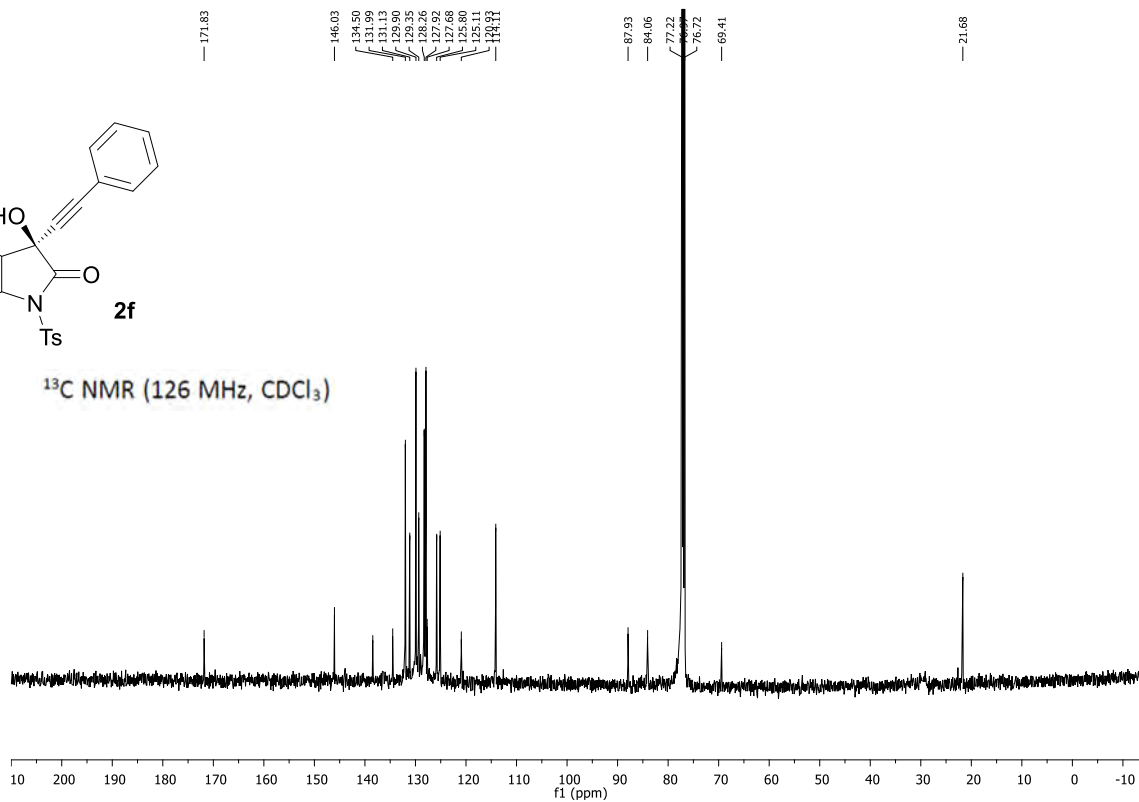

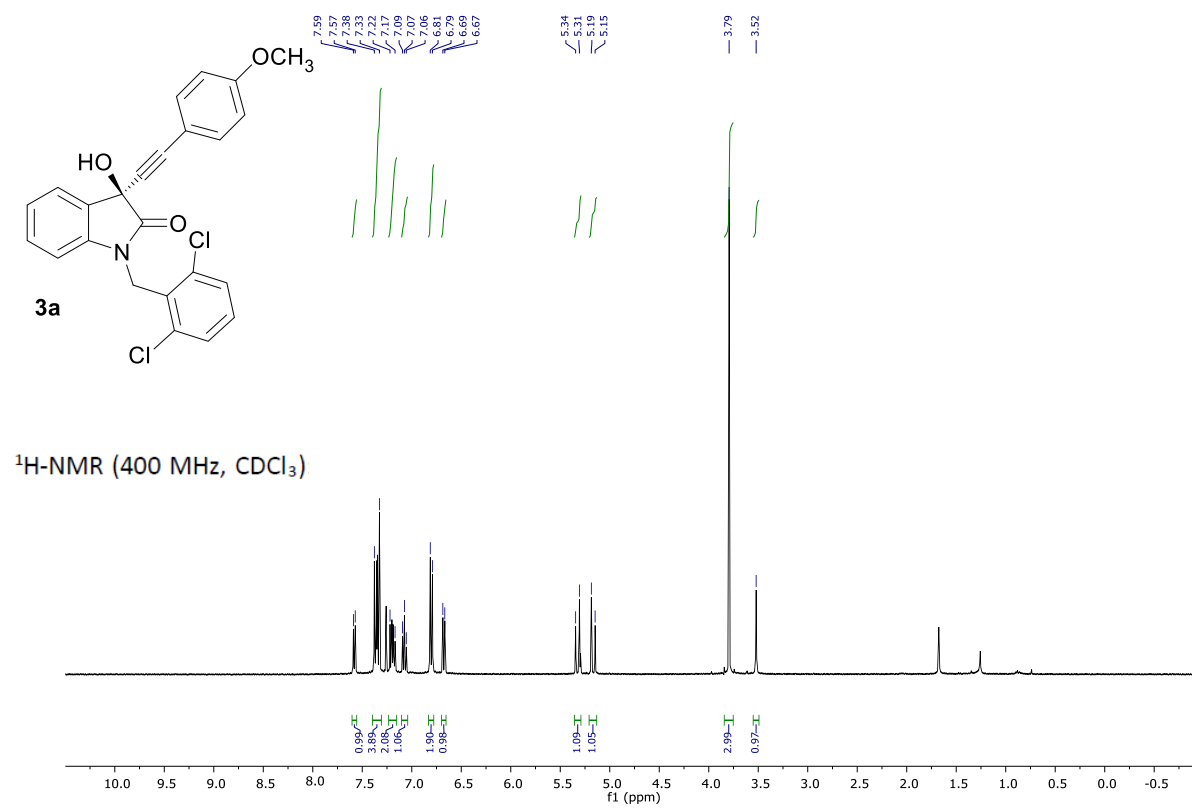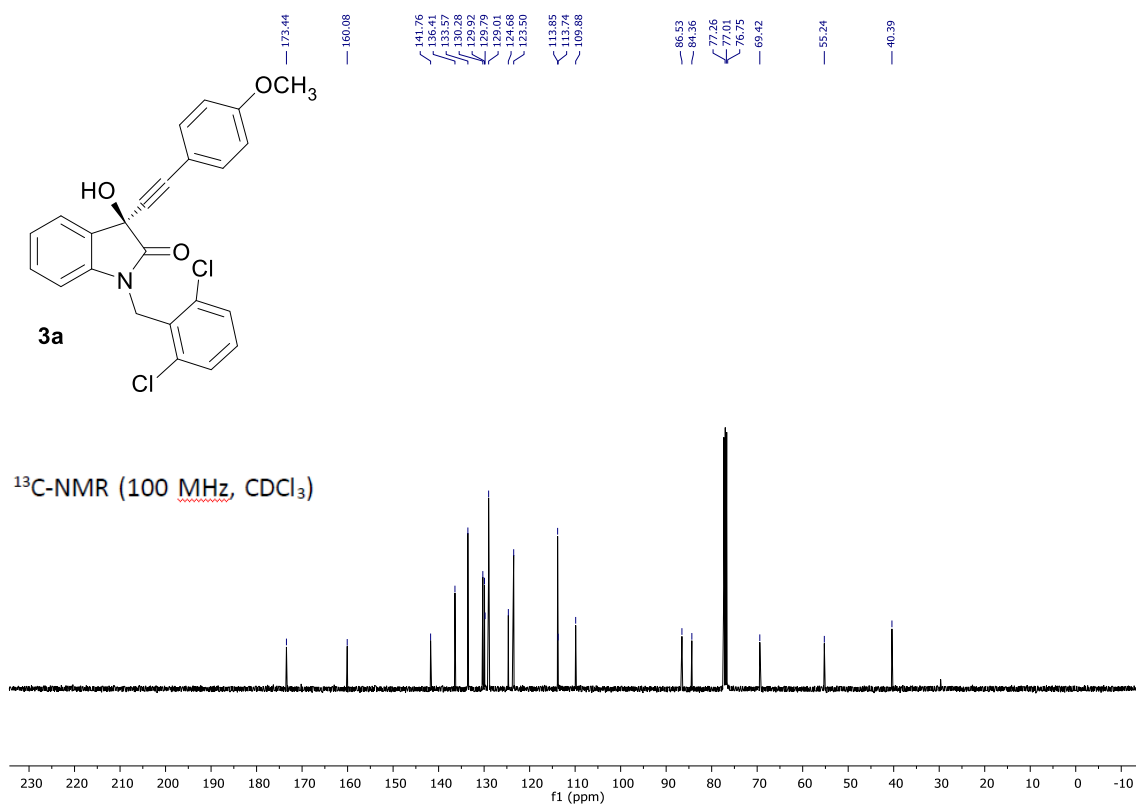

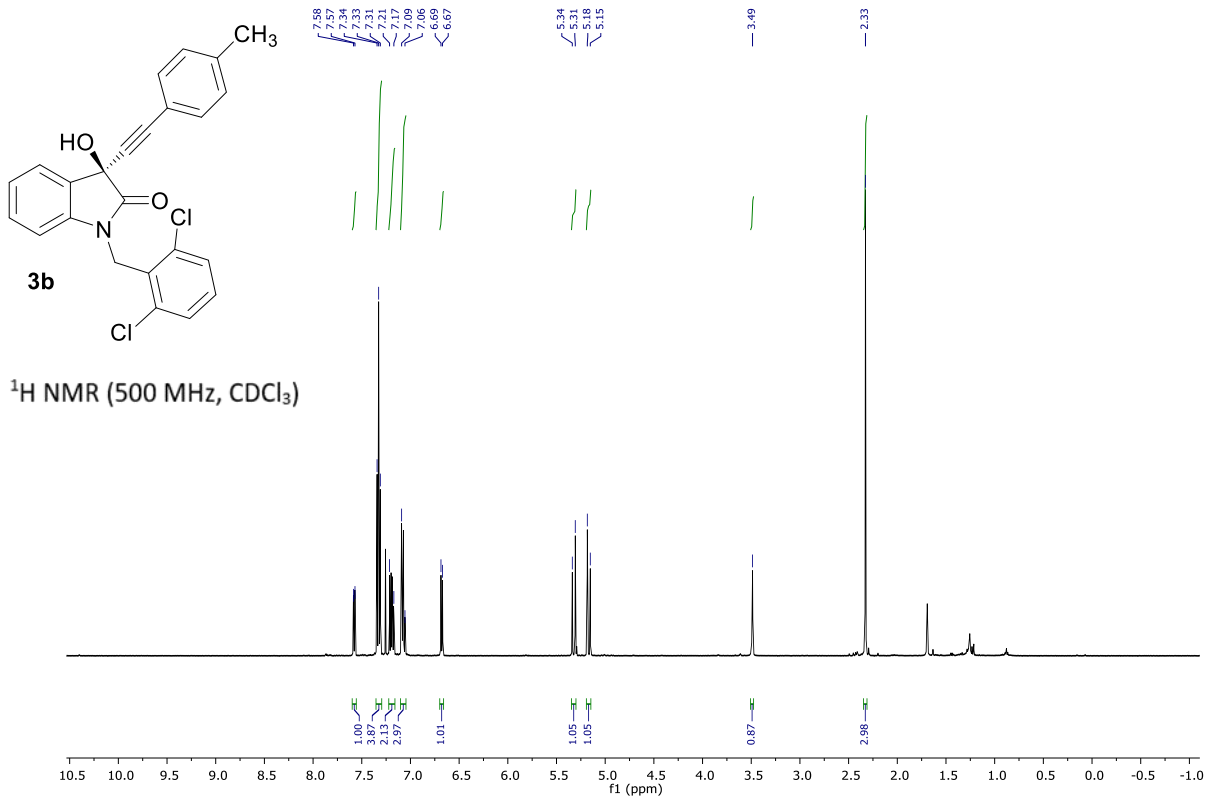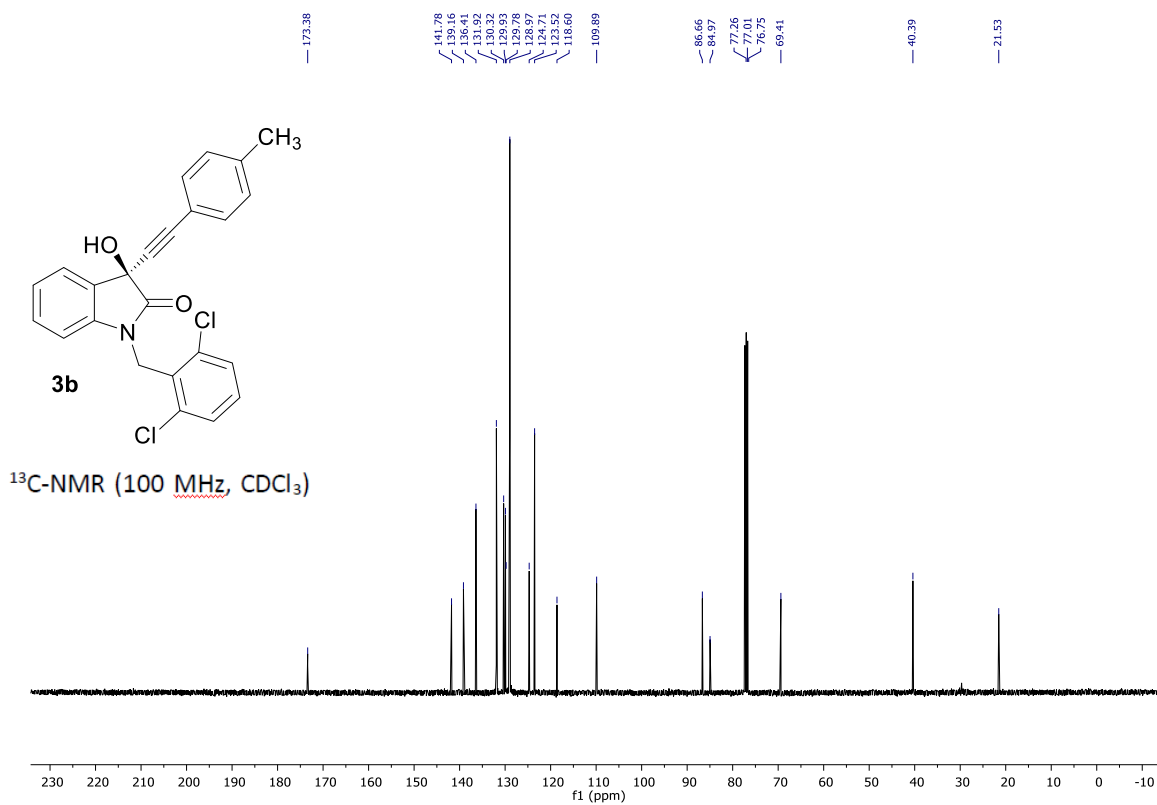

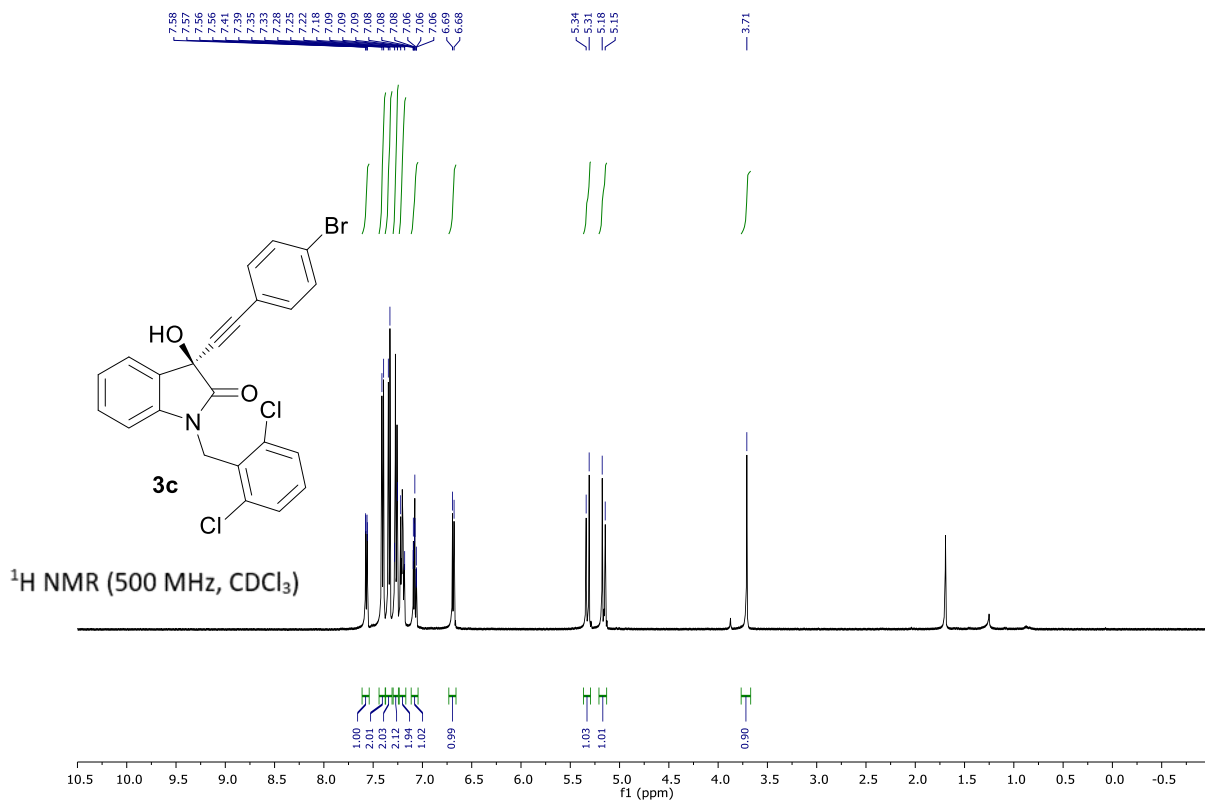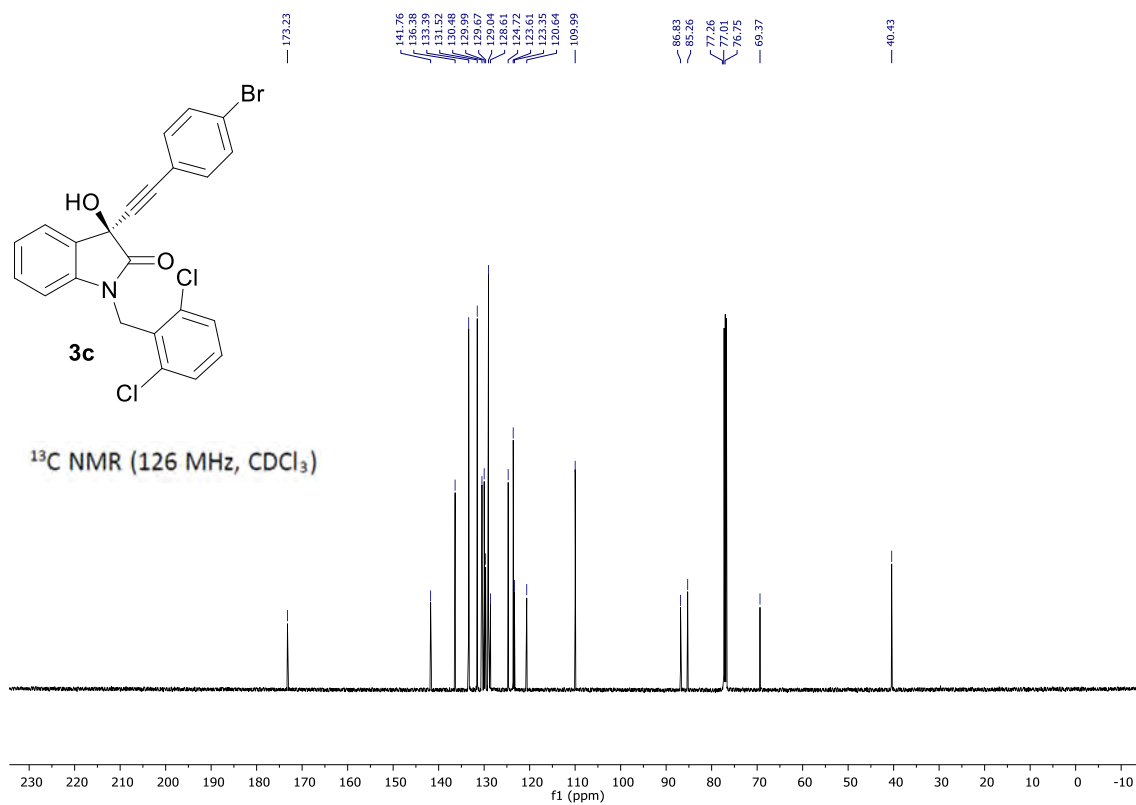



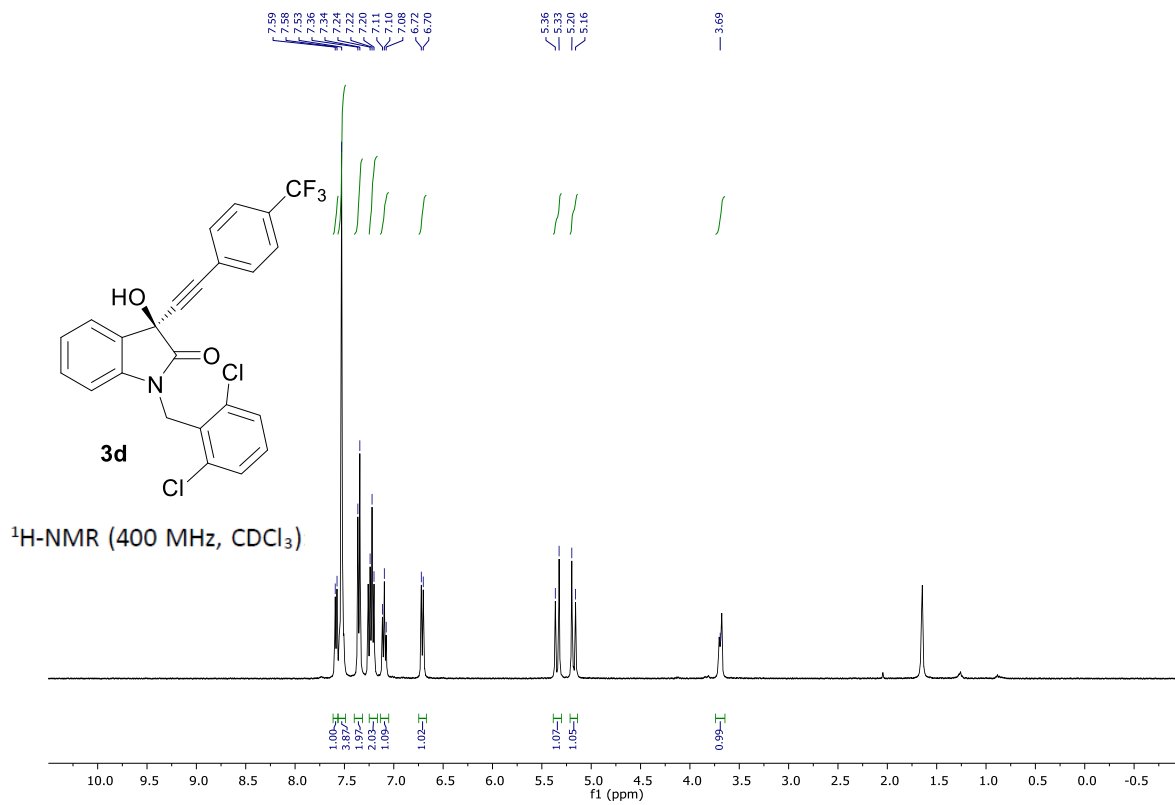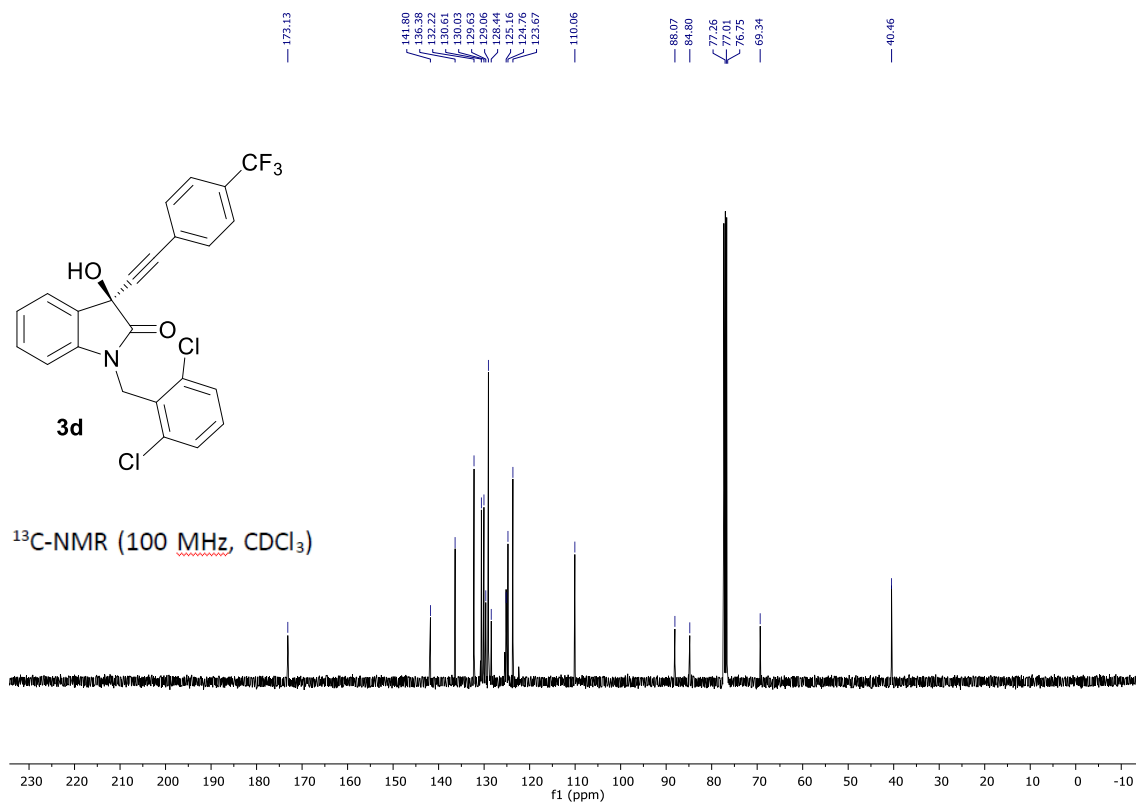

$^{19}\text{F}$  NMR (376 MHz,  $\text{CDCl}_3$ )

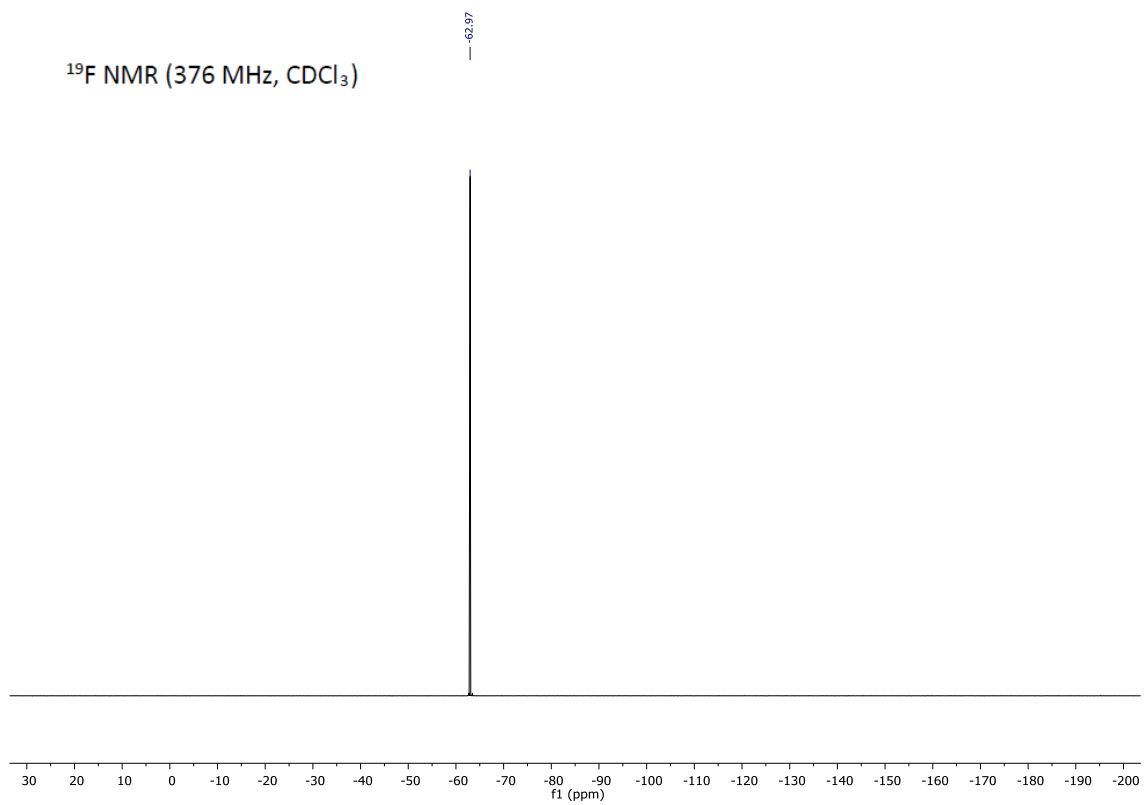

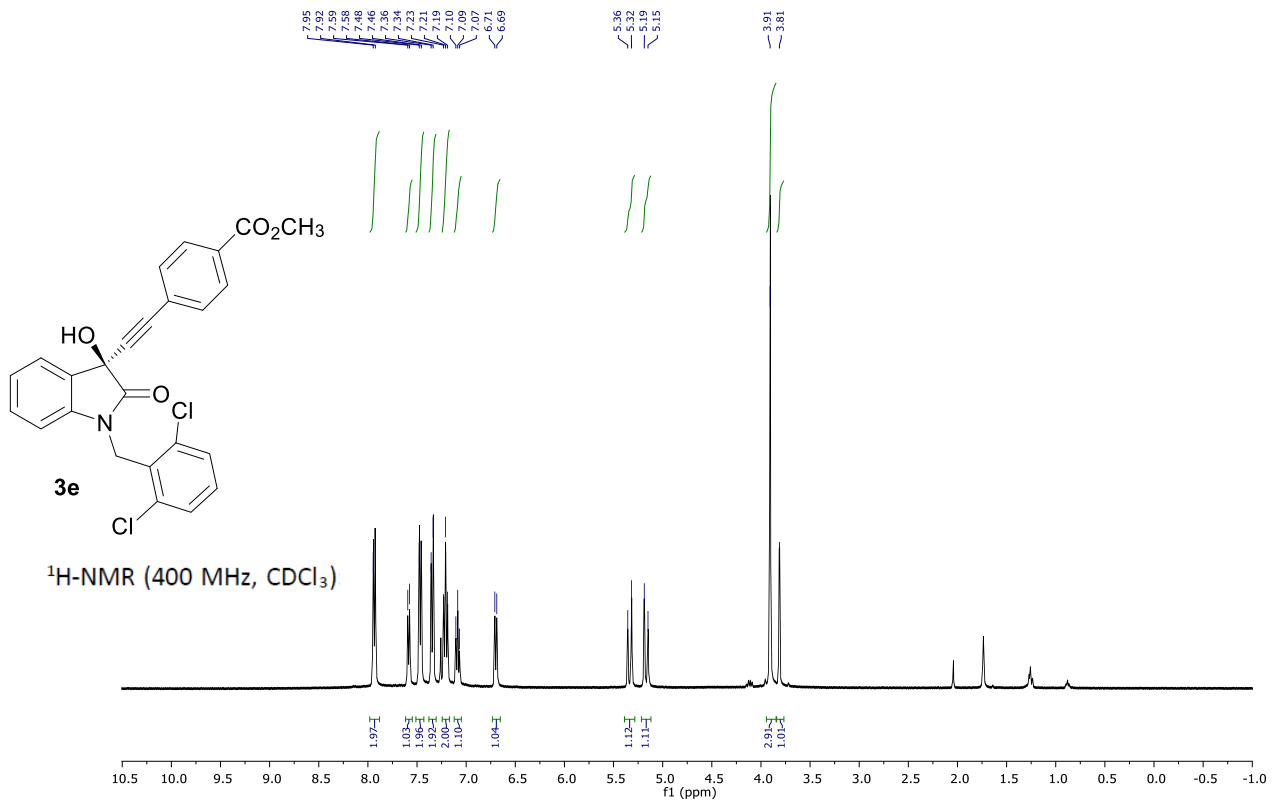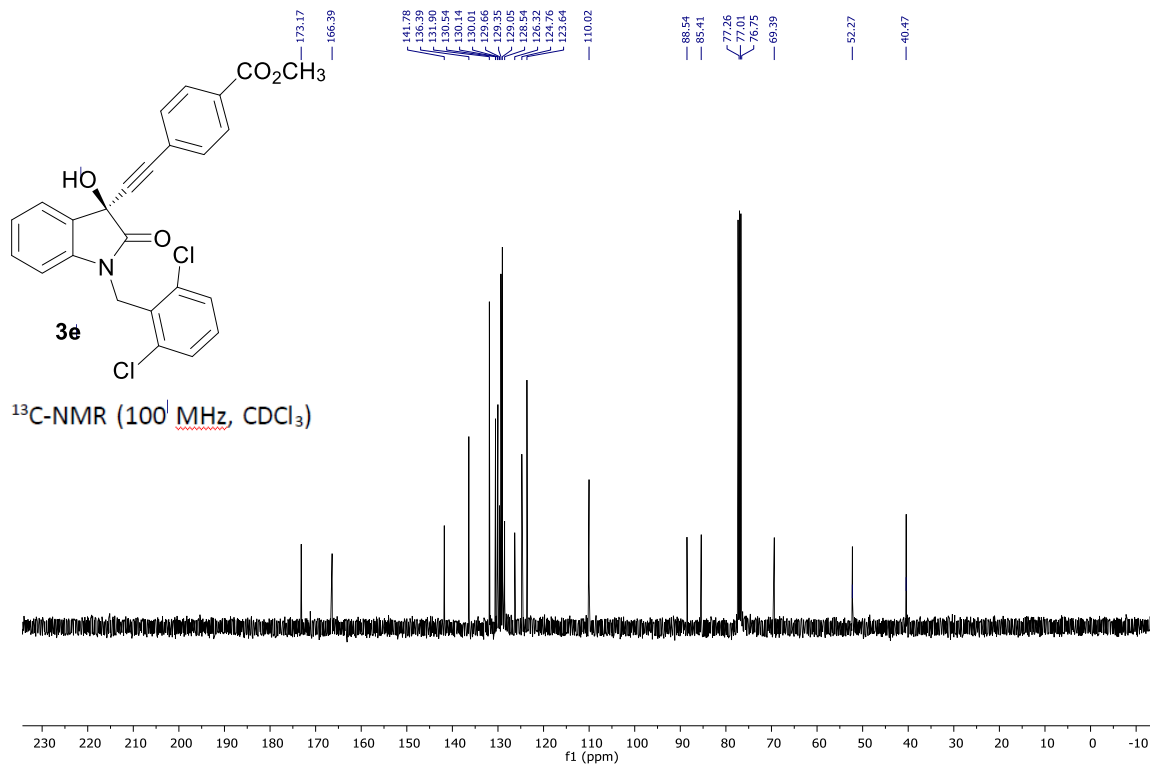

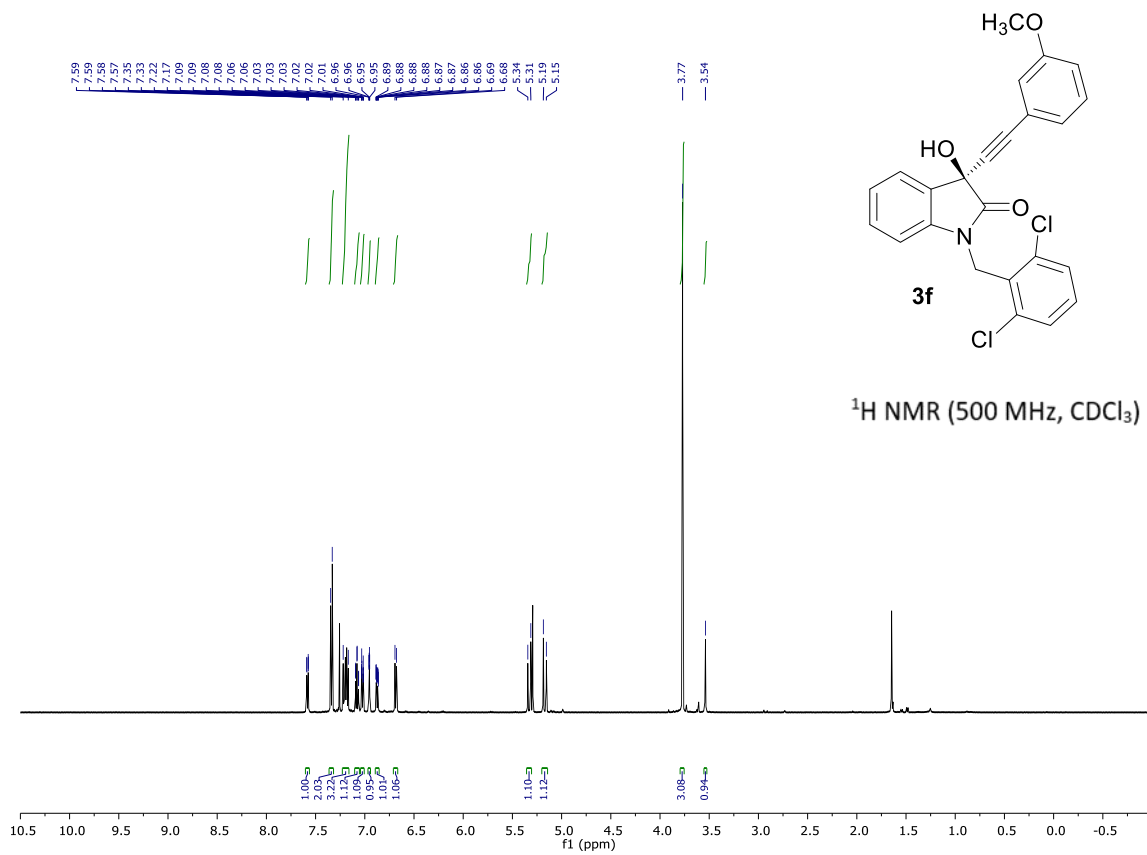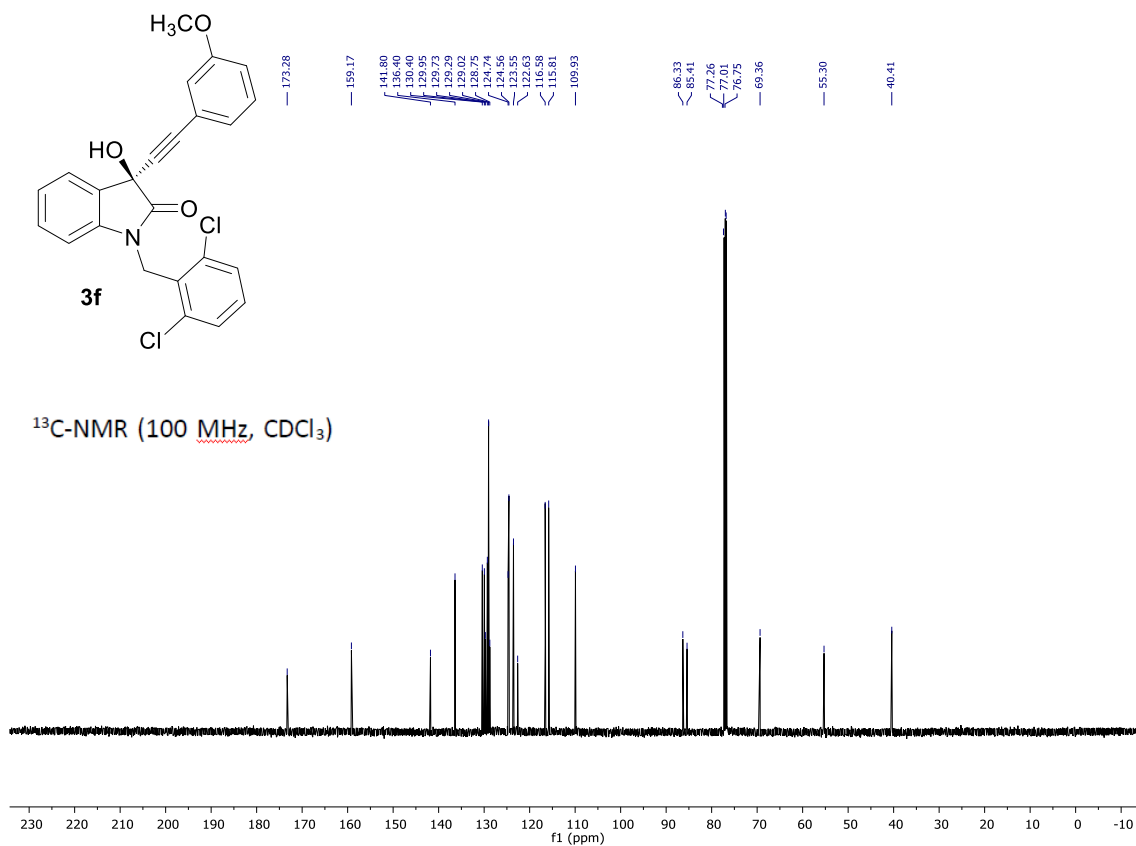

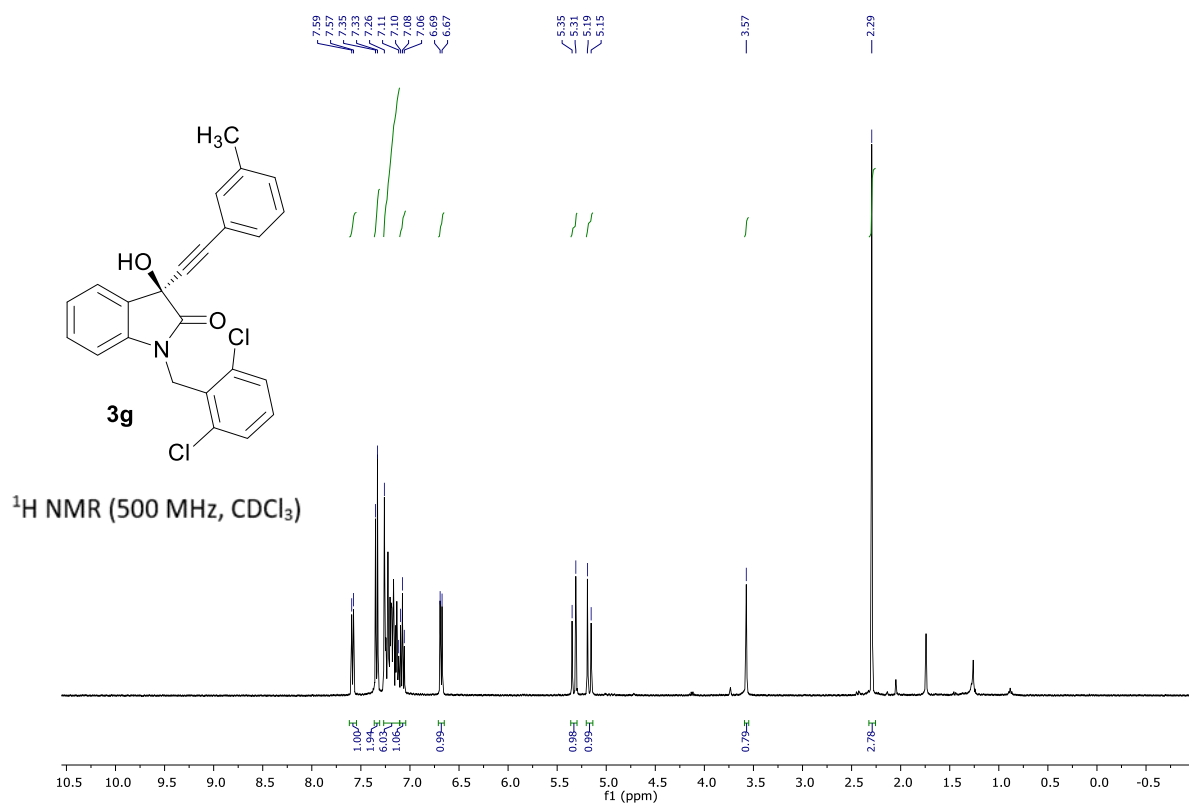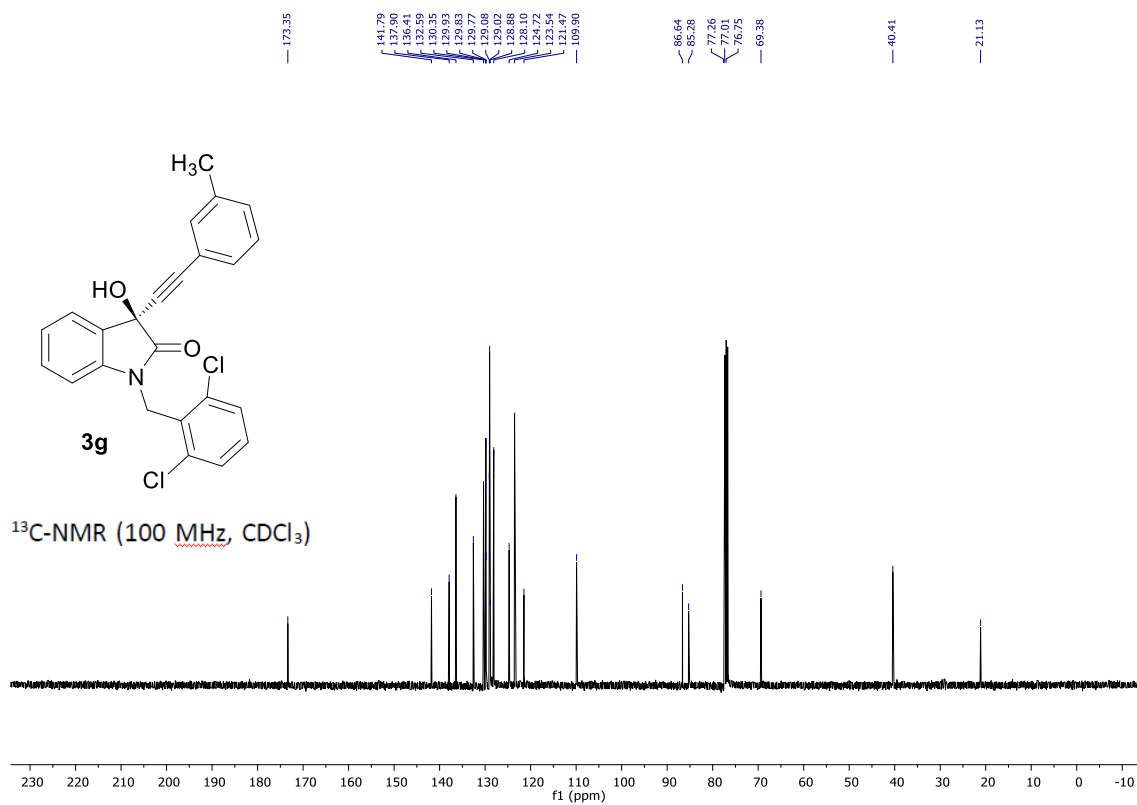

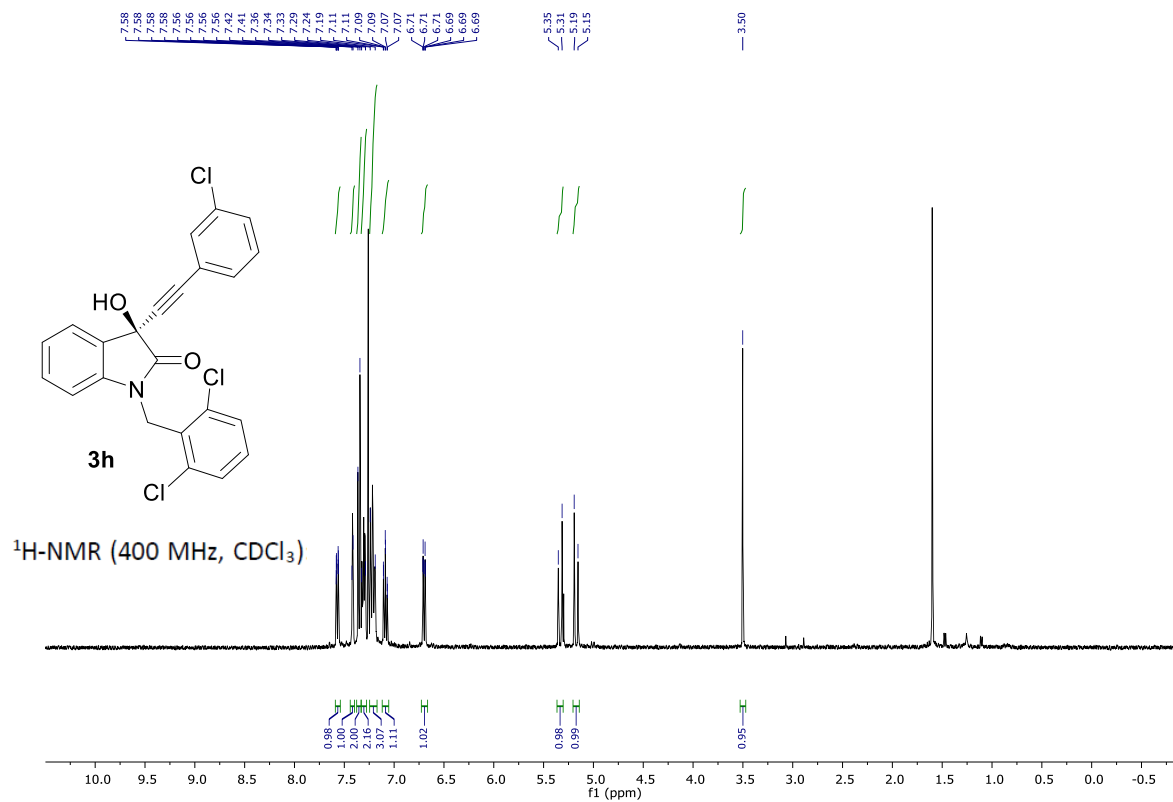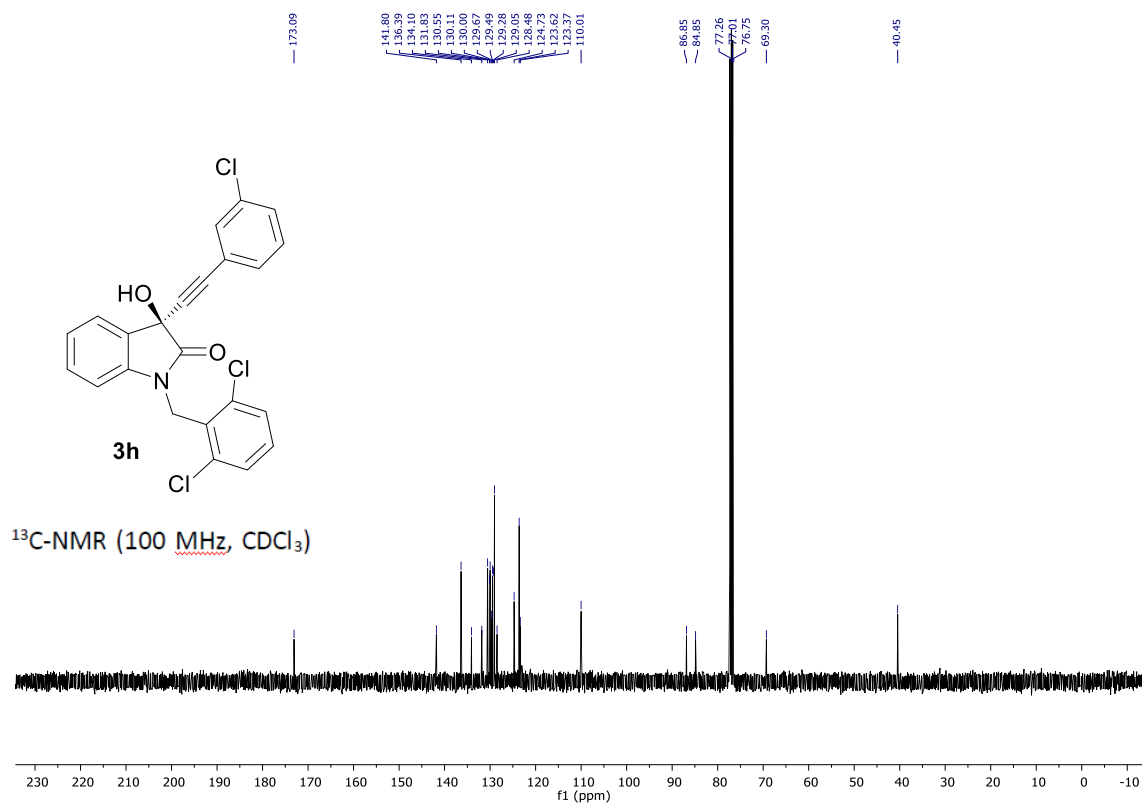

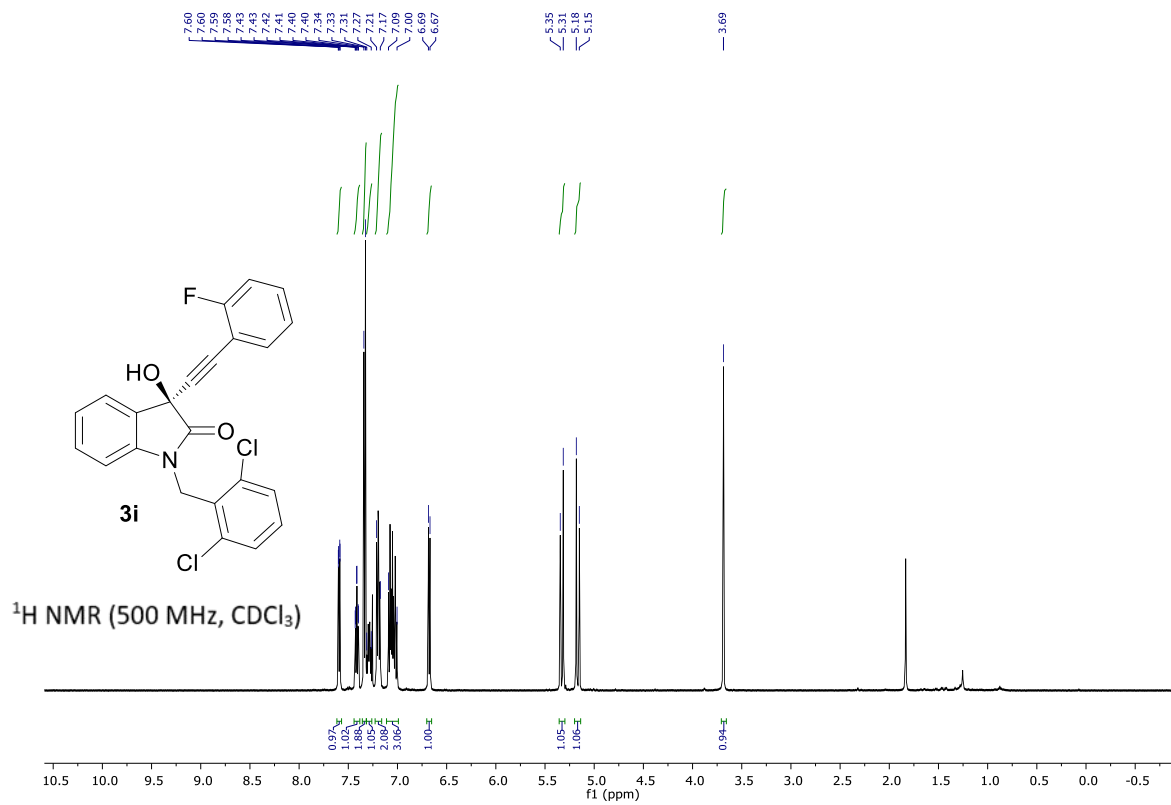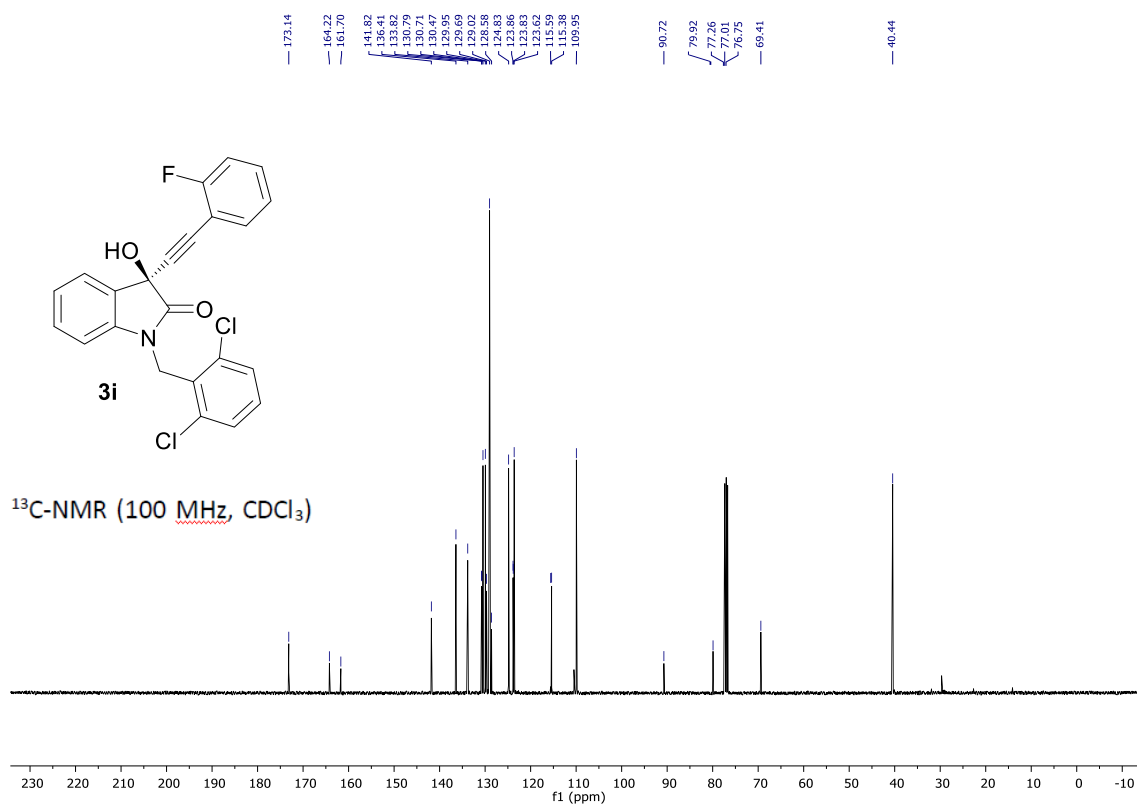

$^{19}\text{F}$  NMR (470 MHz,  $\text{CDCl}_3$ )

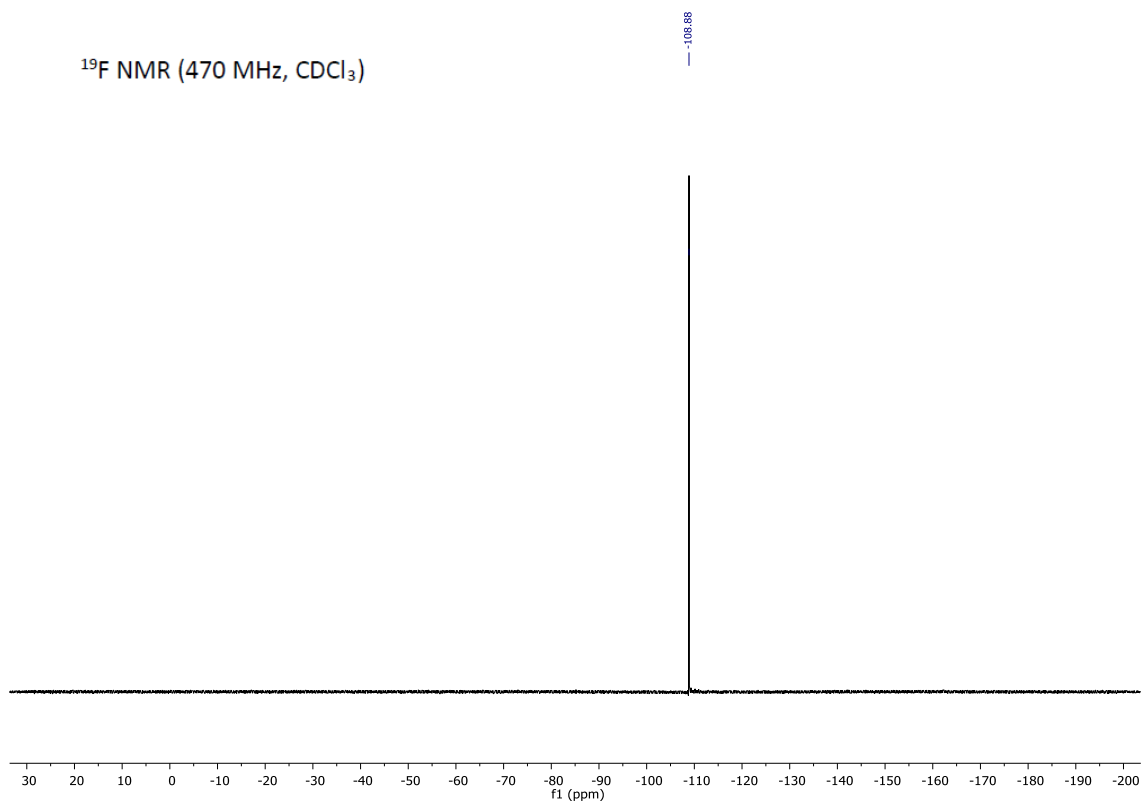



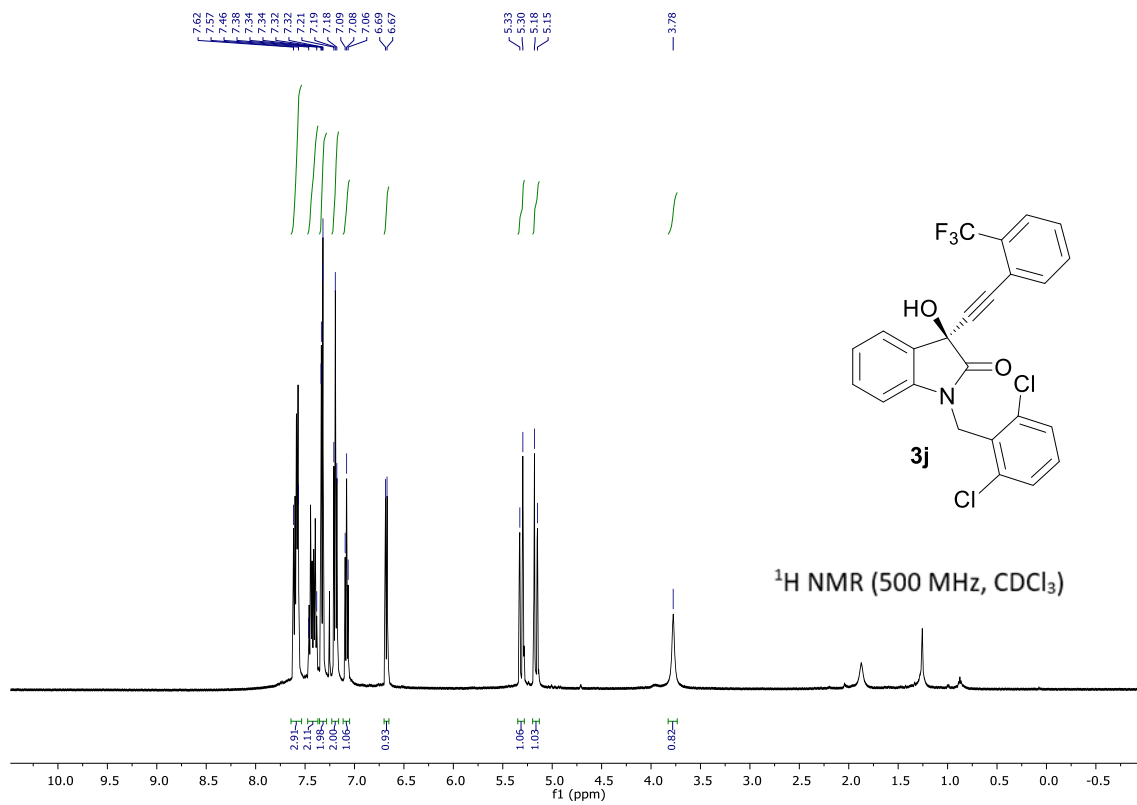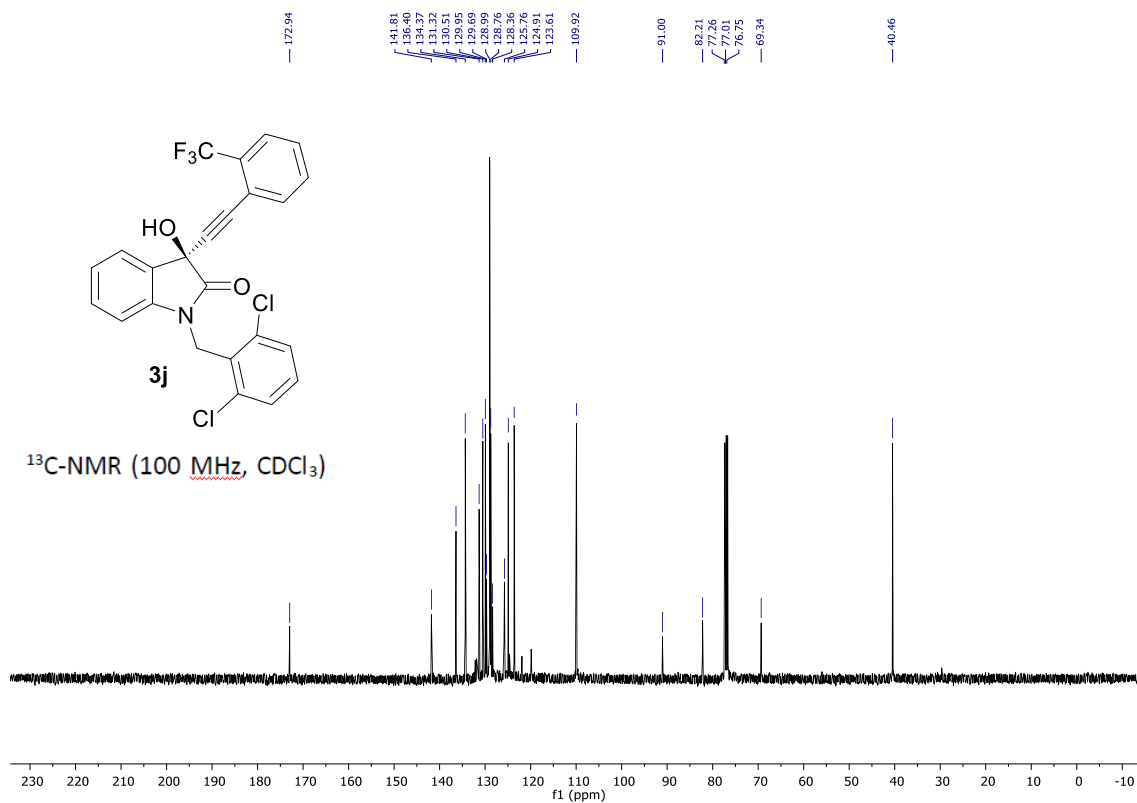

$^{19}\text{F}$  NMR (470 MHz,  $\text{CDCl}_3$ )

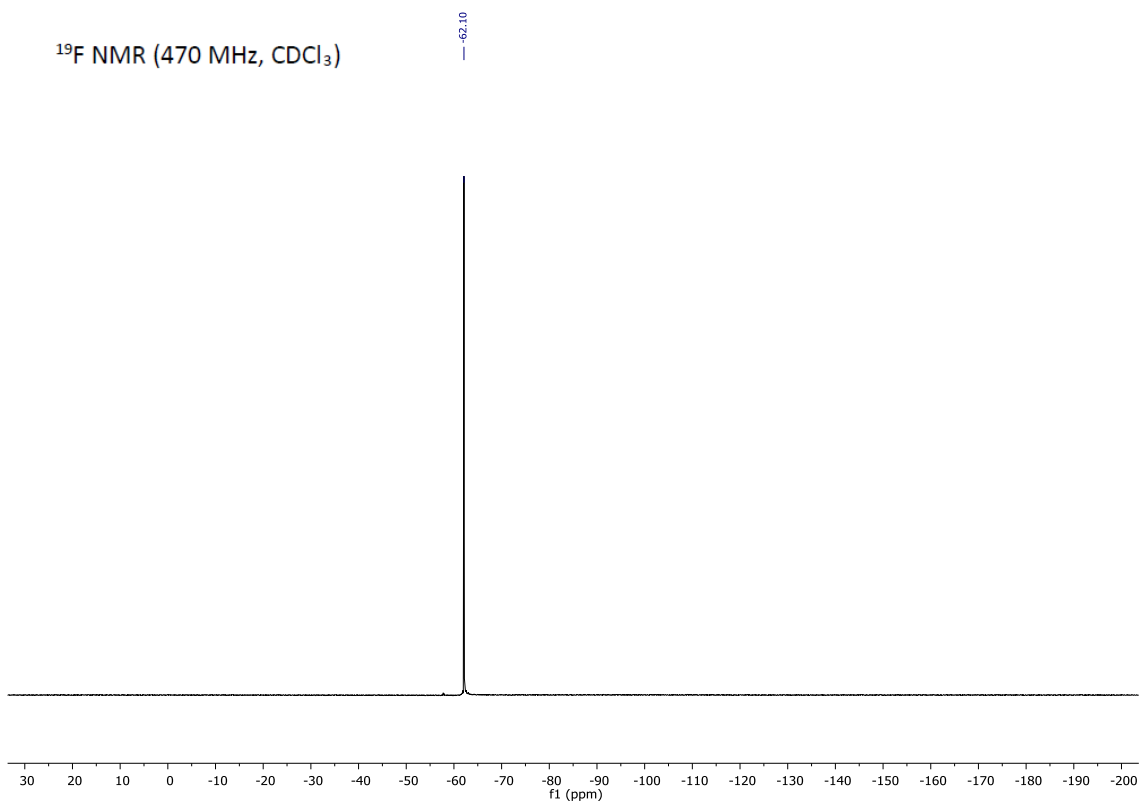

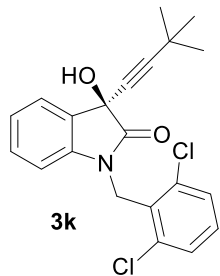

<sup>1</sup>H-NMR (400 MHz, CDCl<sub>3</sub>)

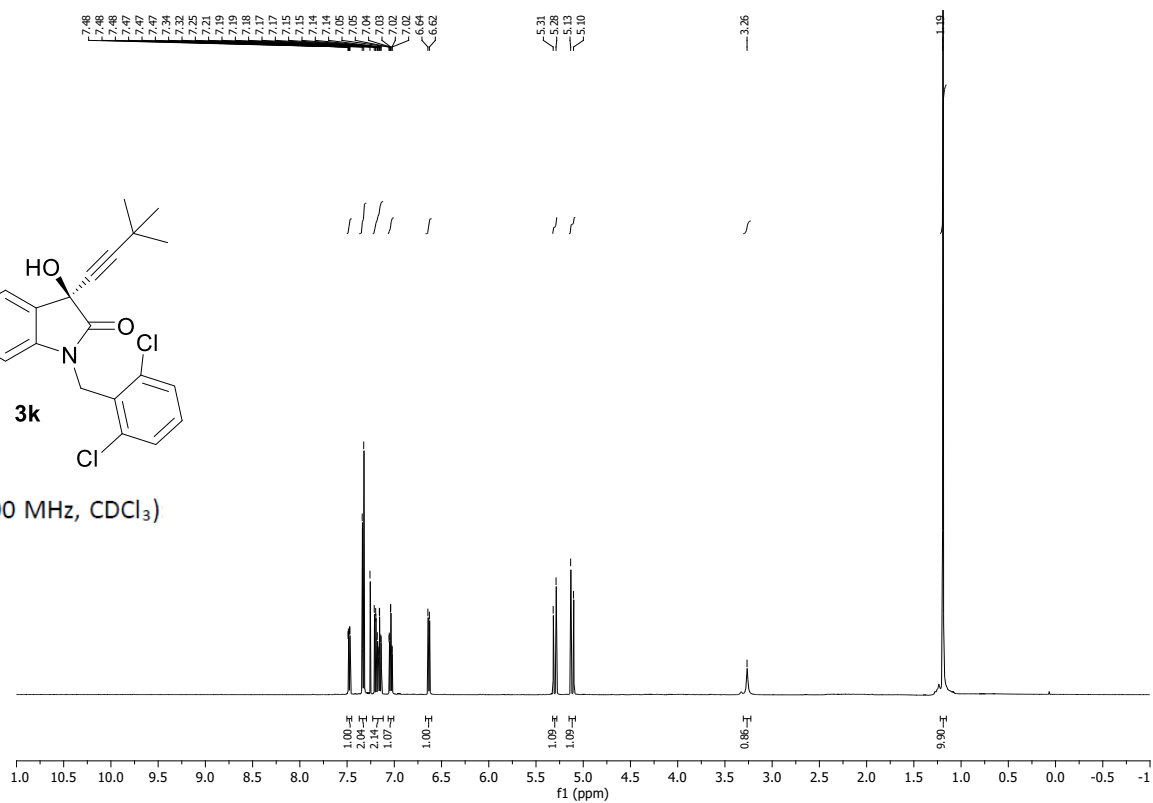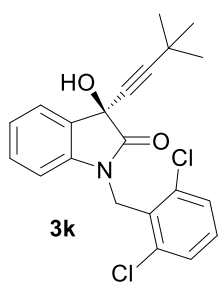

<sup>13</sup>C-NMR (100 MHz, CDCl<sub>3</sub>)

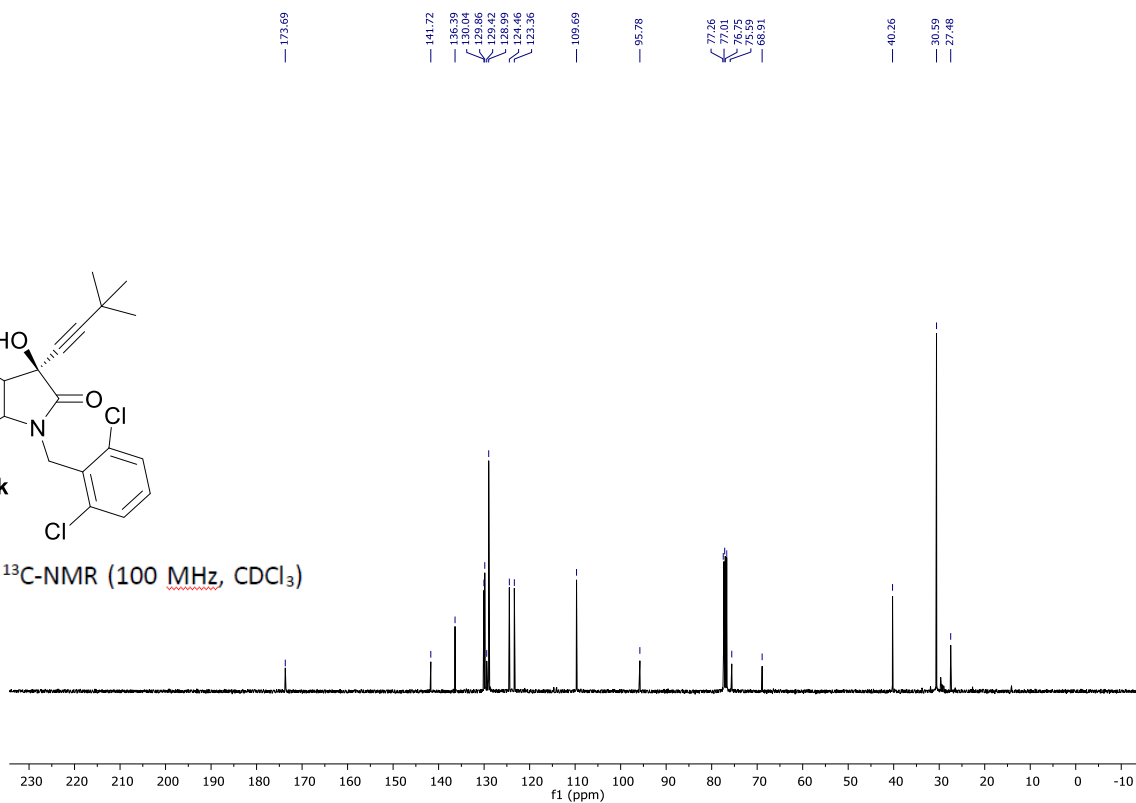

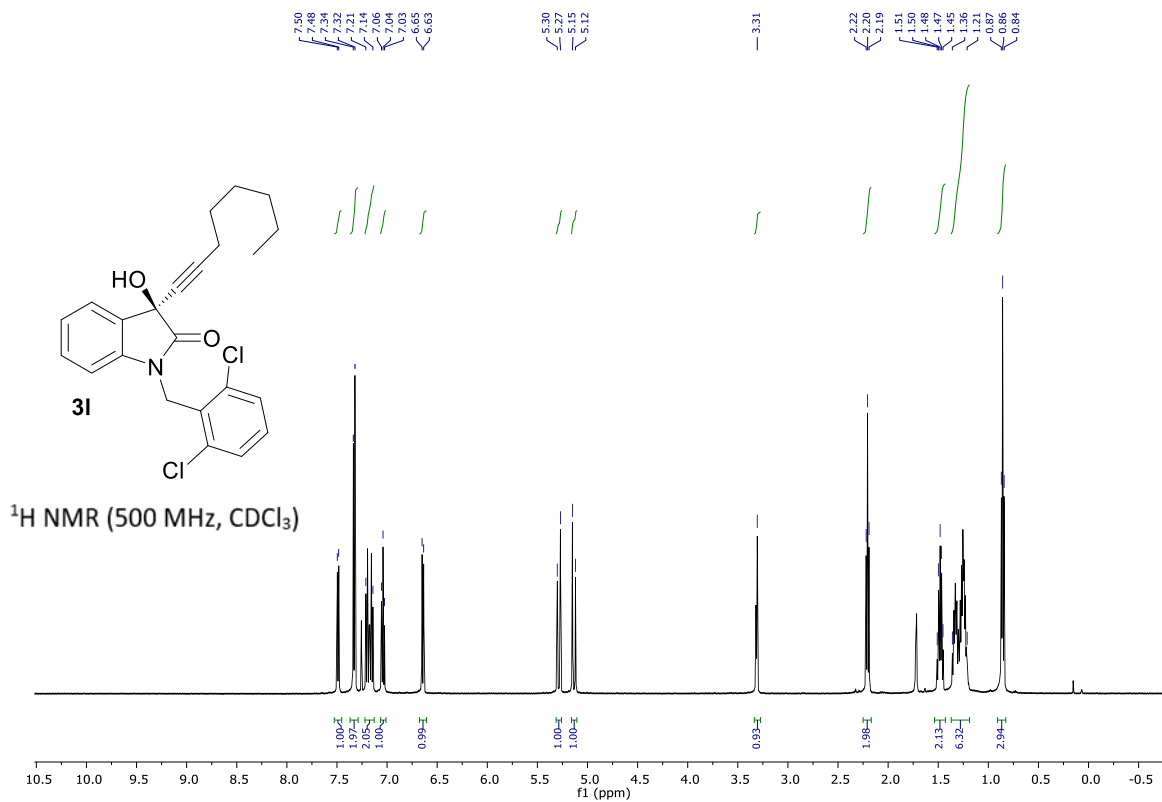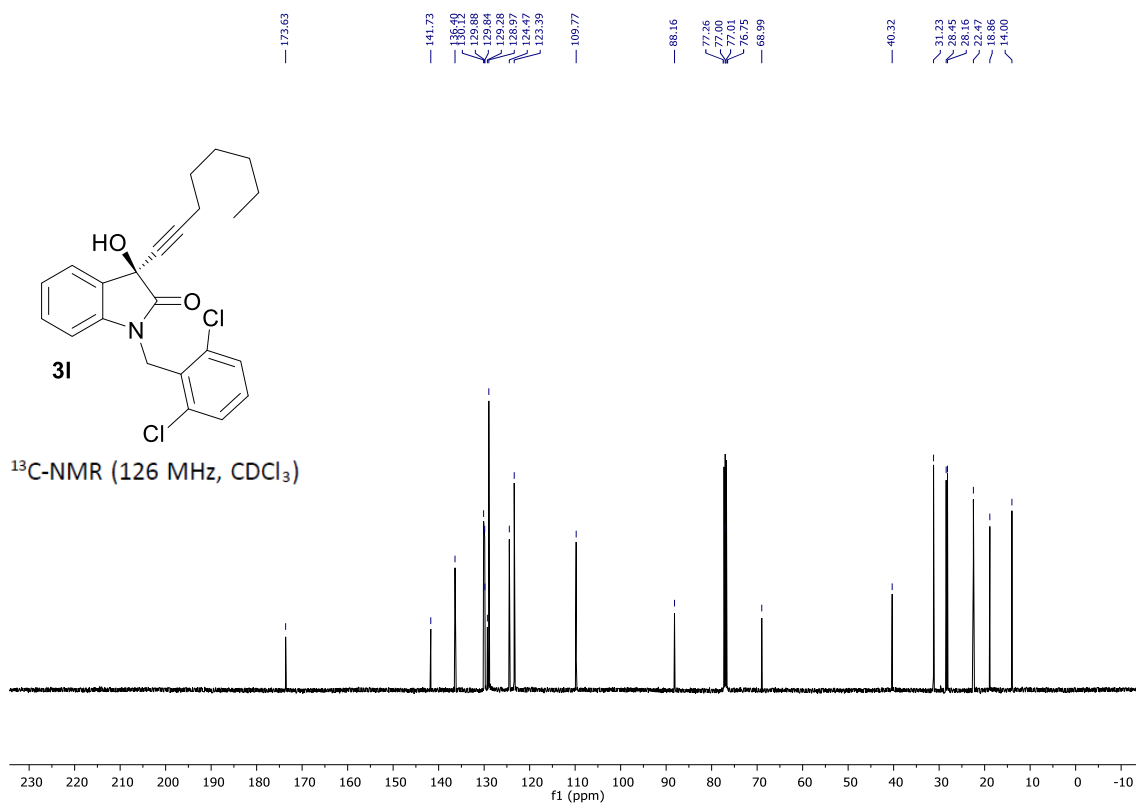

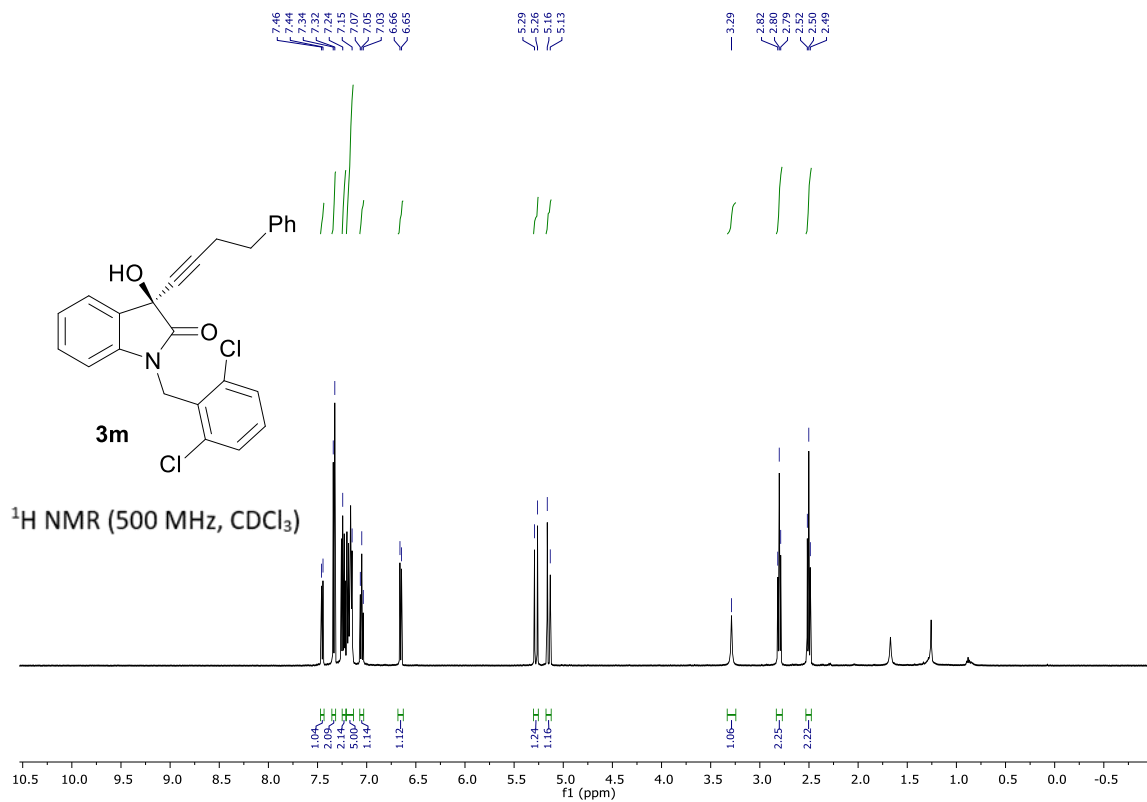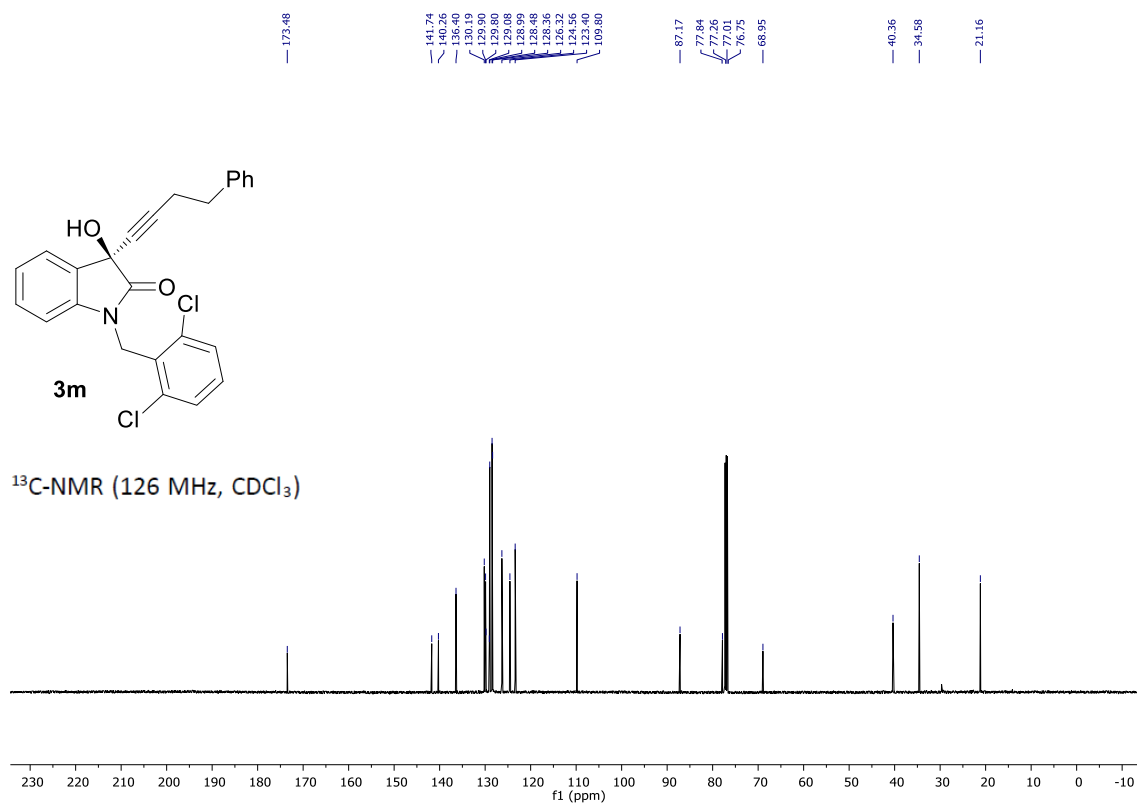

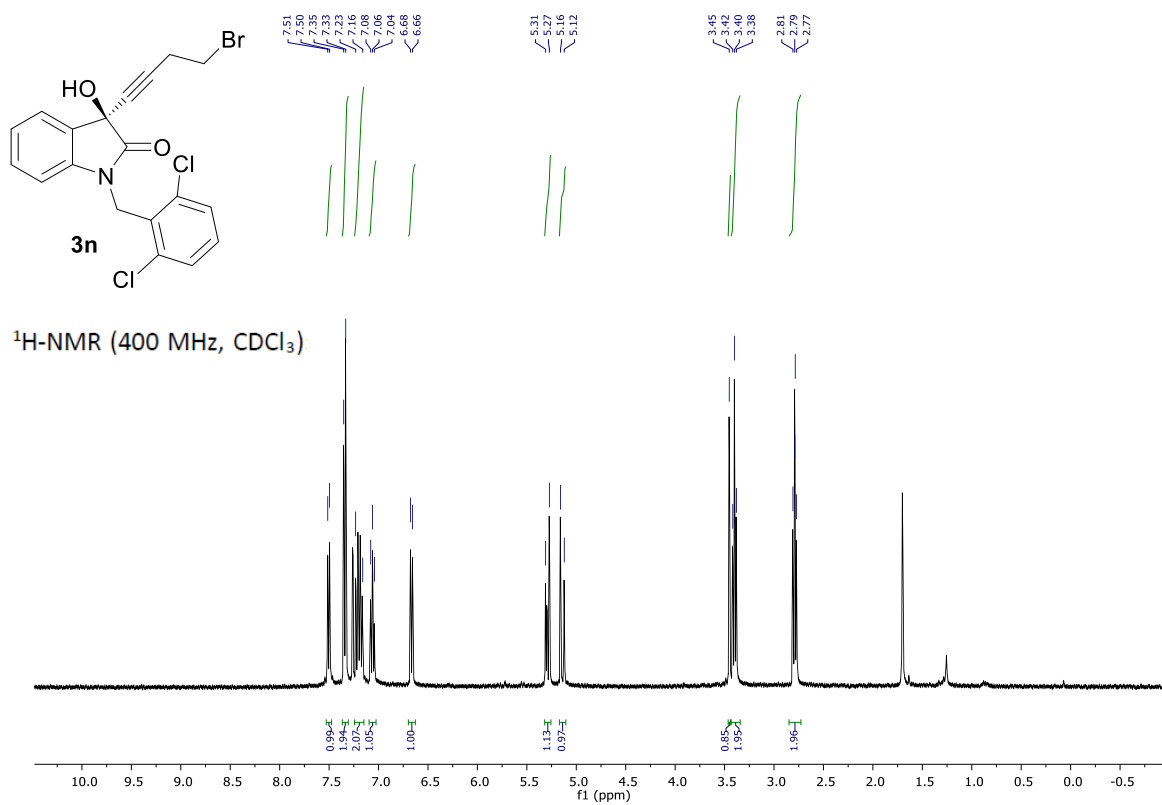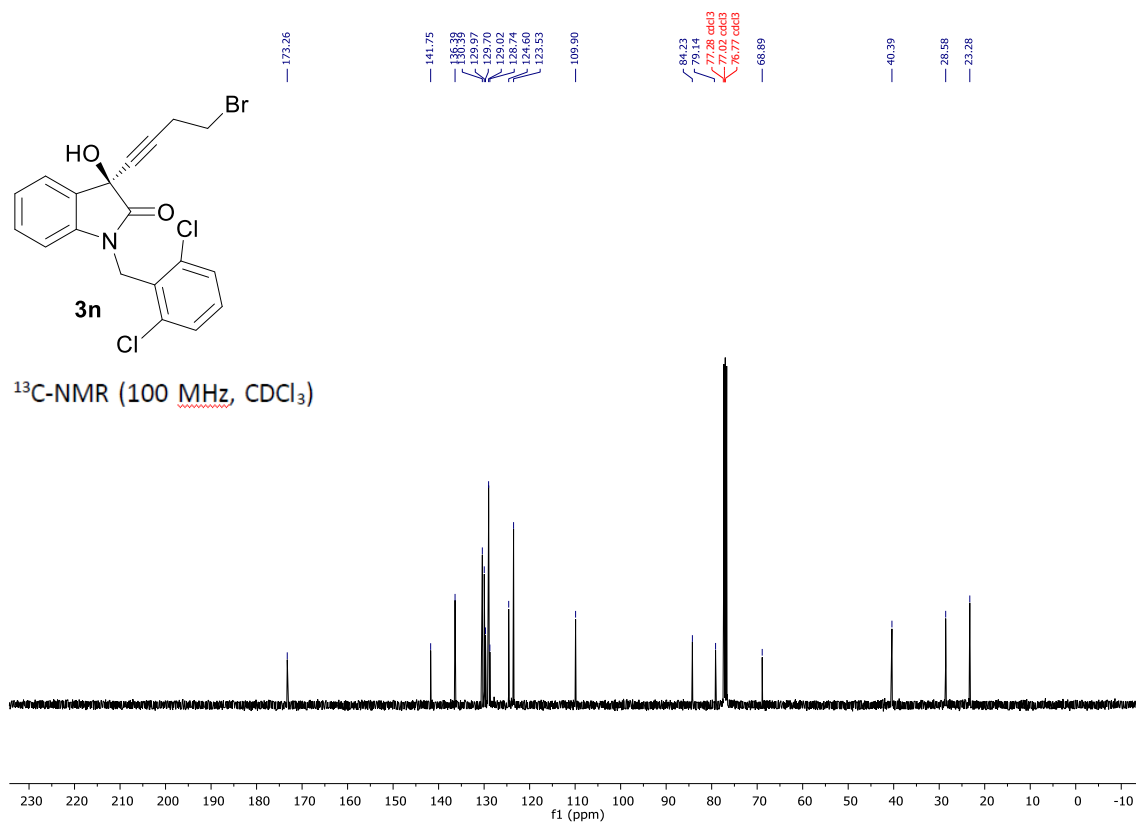

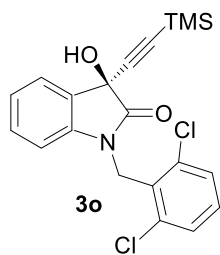

$^1\text{H-NMR}$  (400 MHz,  $\text{CDCl}_3$ )

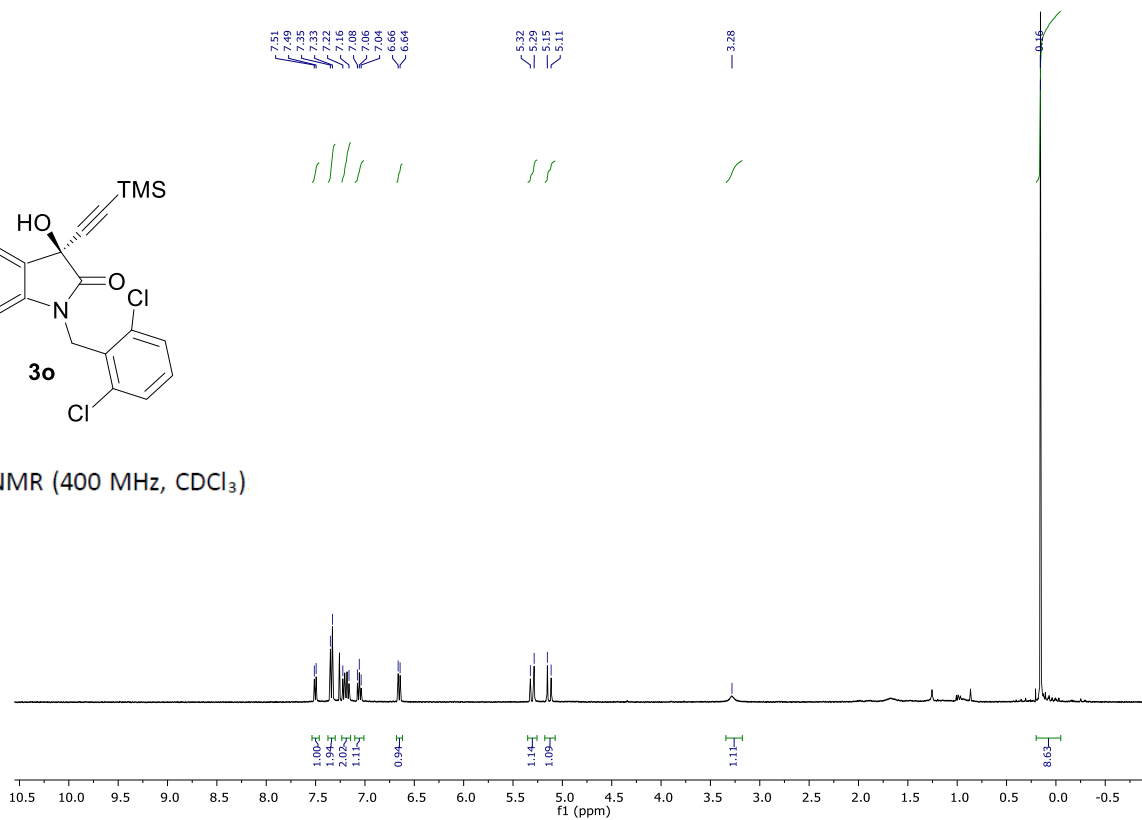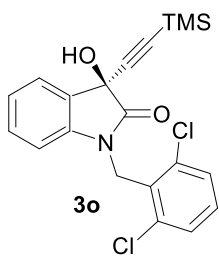

$^{13}\text{C-NMR}$  (100 MHz,  $\text{CDCl}_3$ )

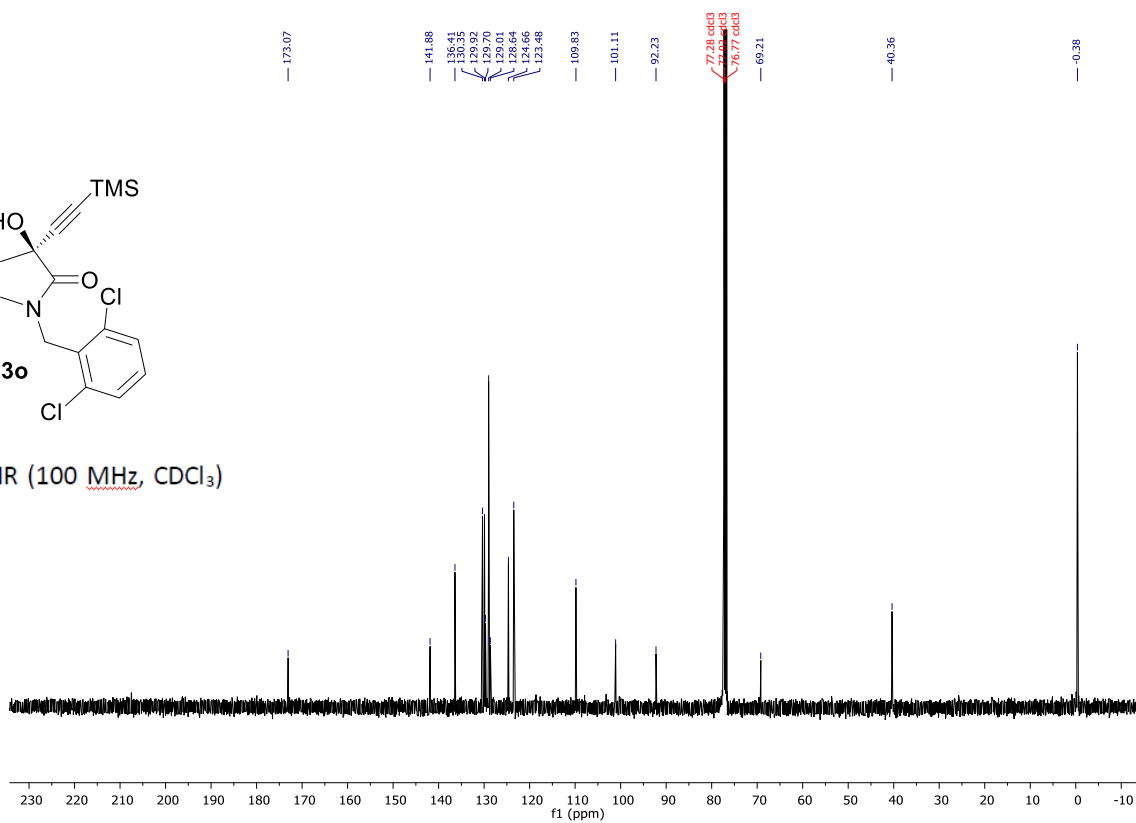

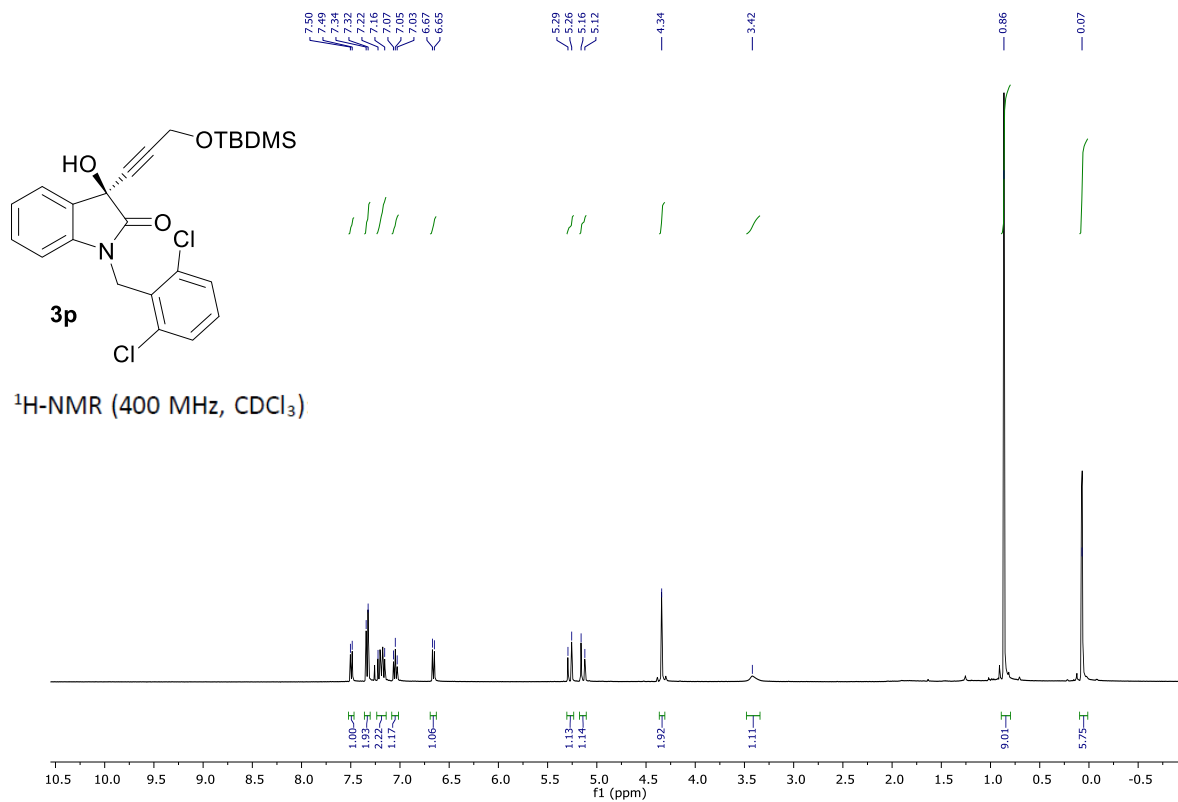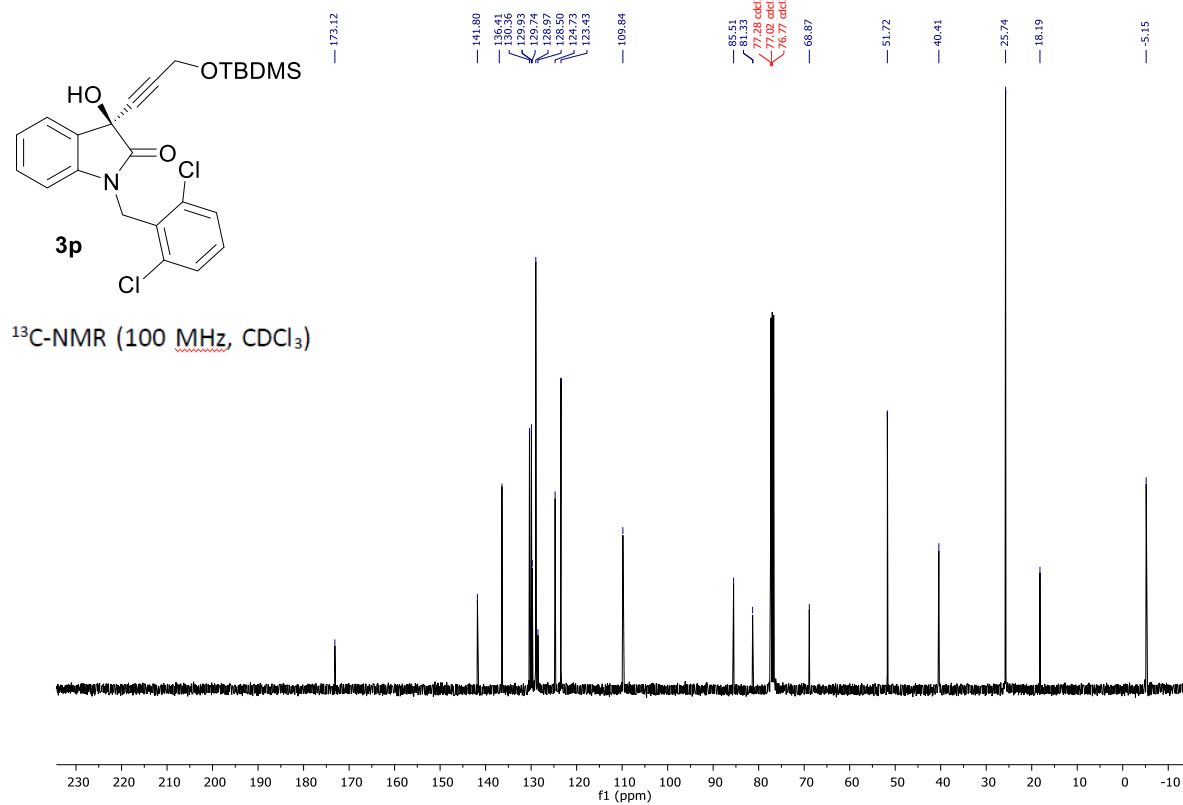



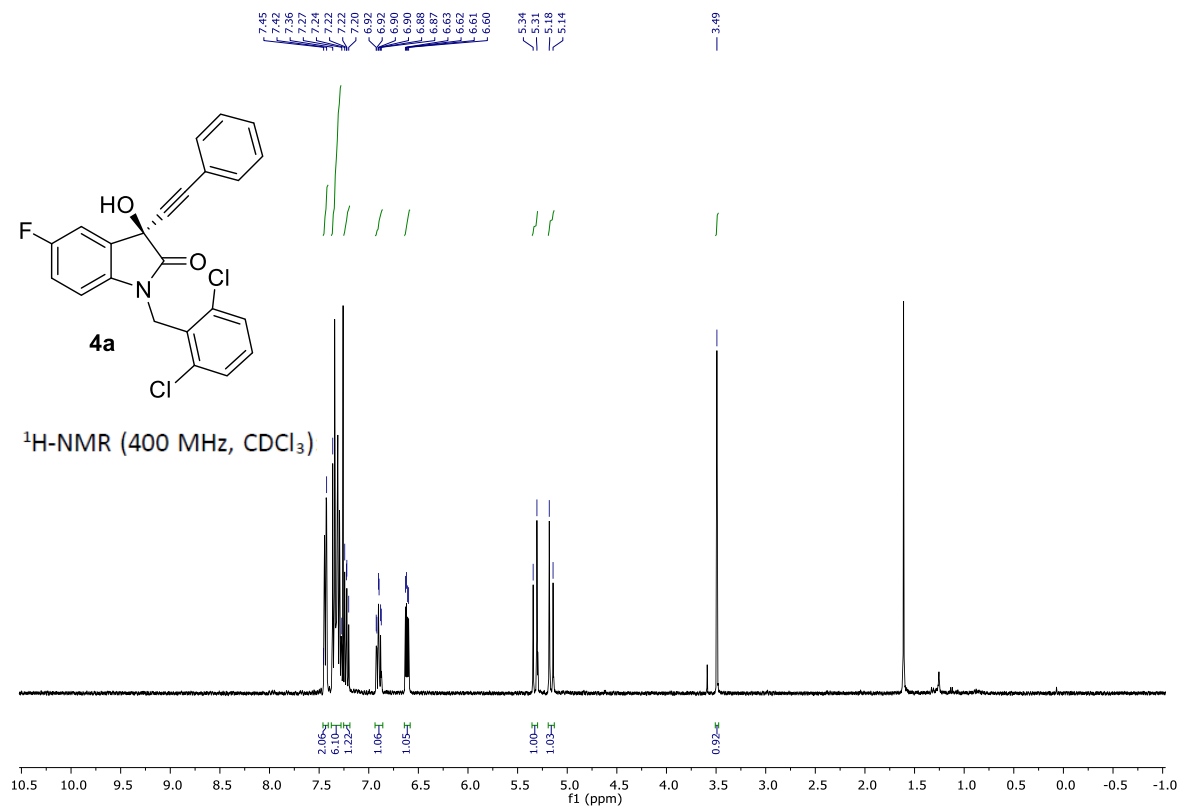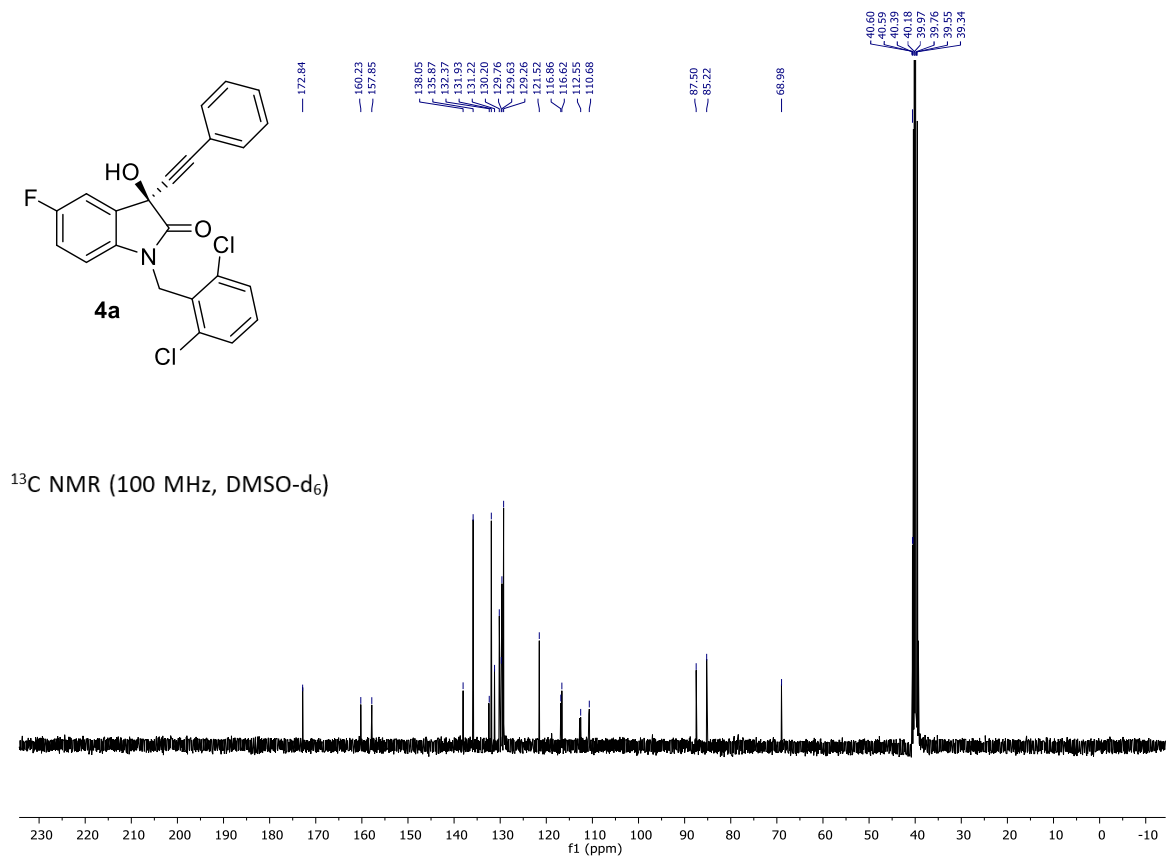

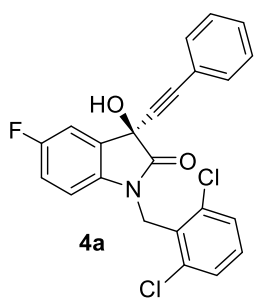

$^{19}\text{F}$  NMR (376 MHz,  $\text{CDCl}_3$ )

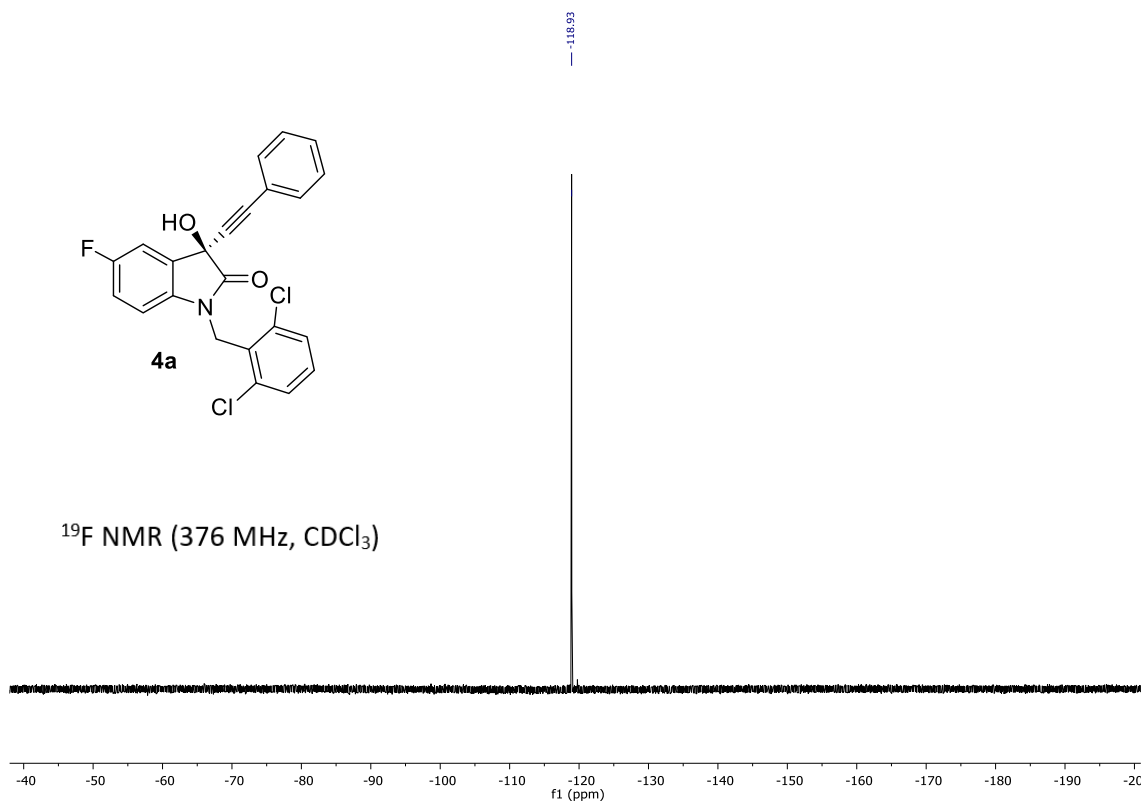

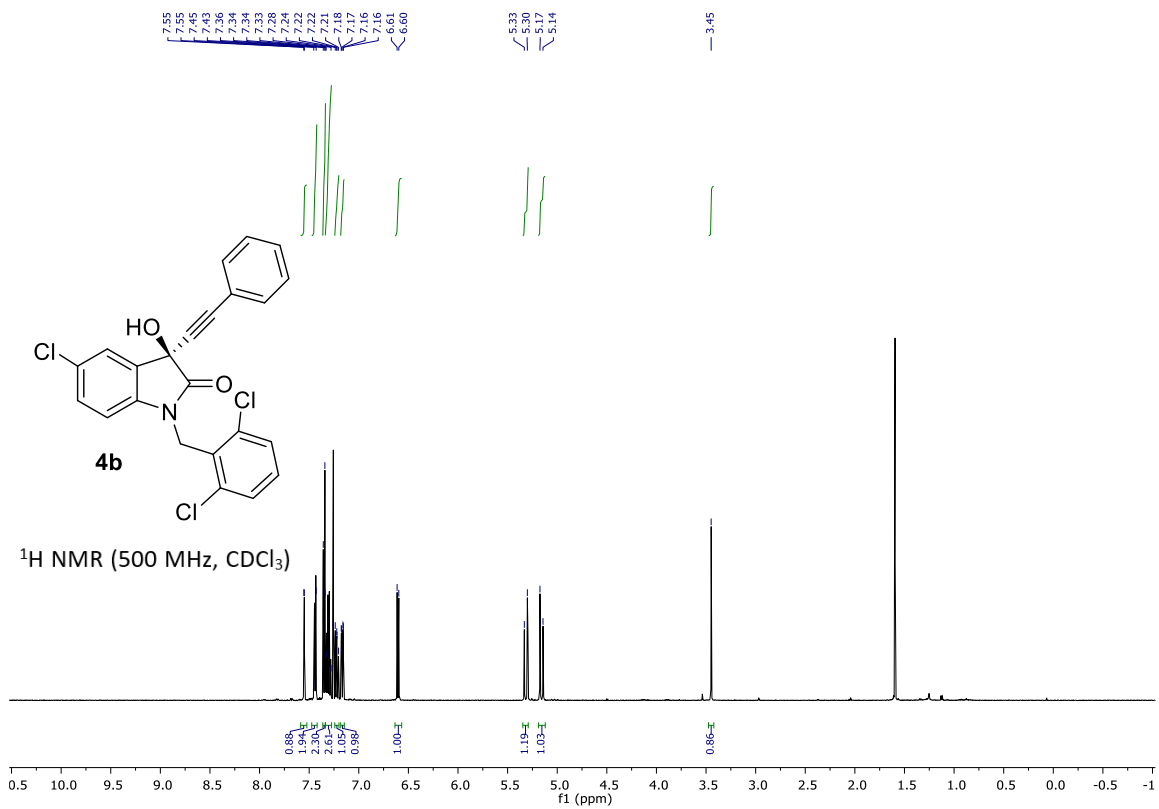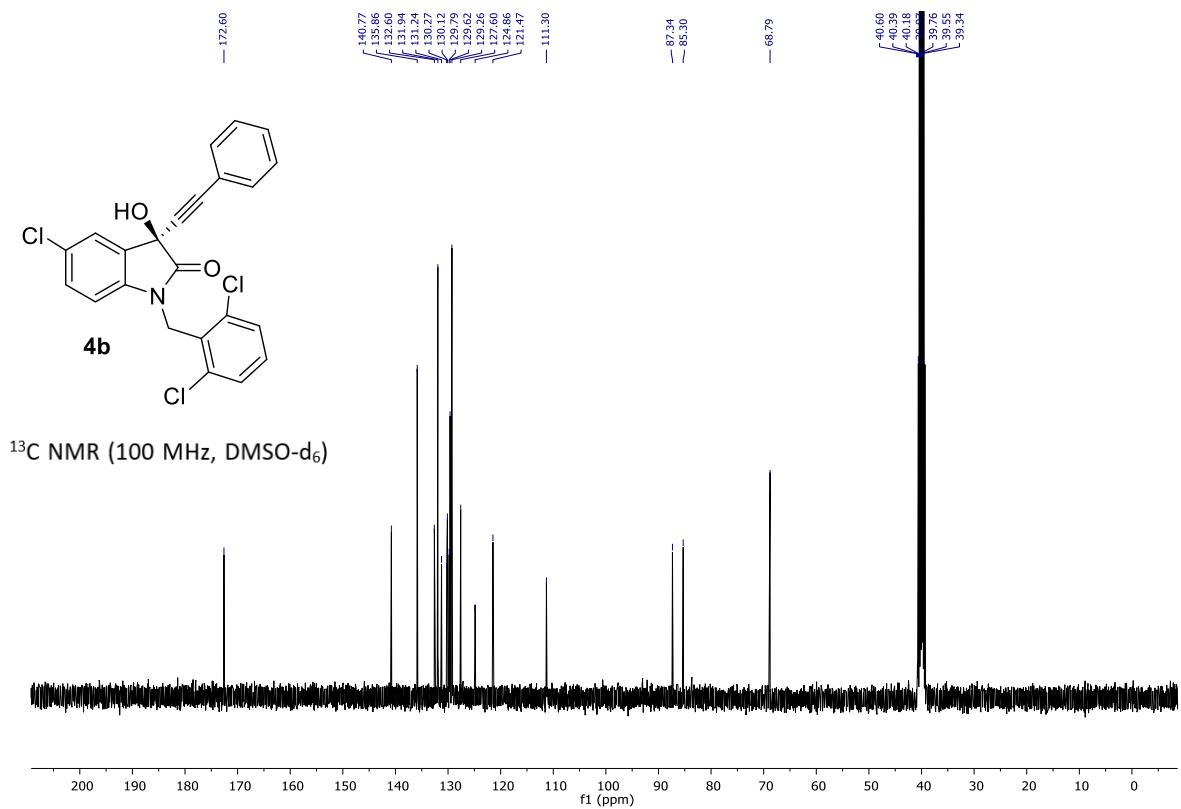

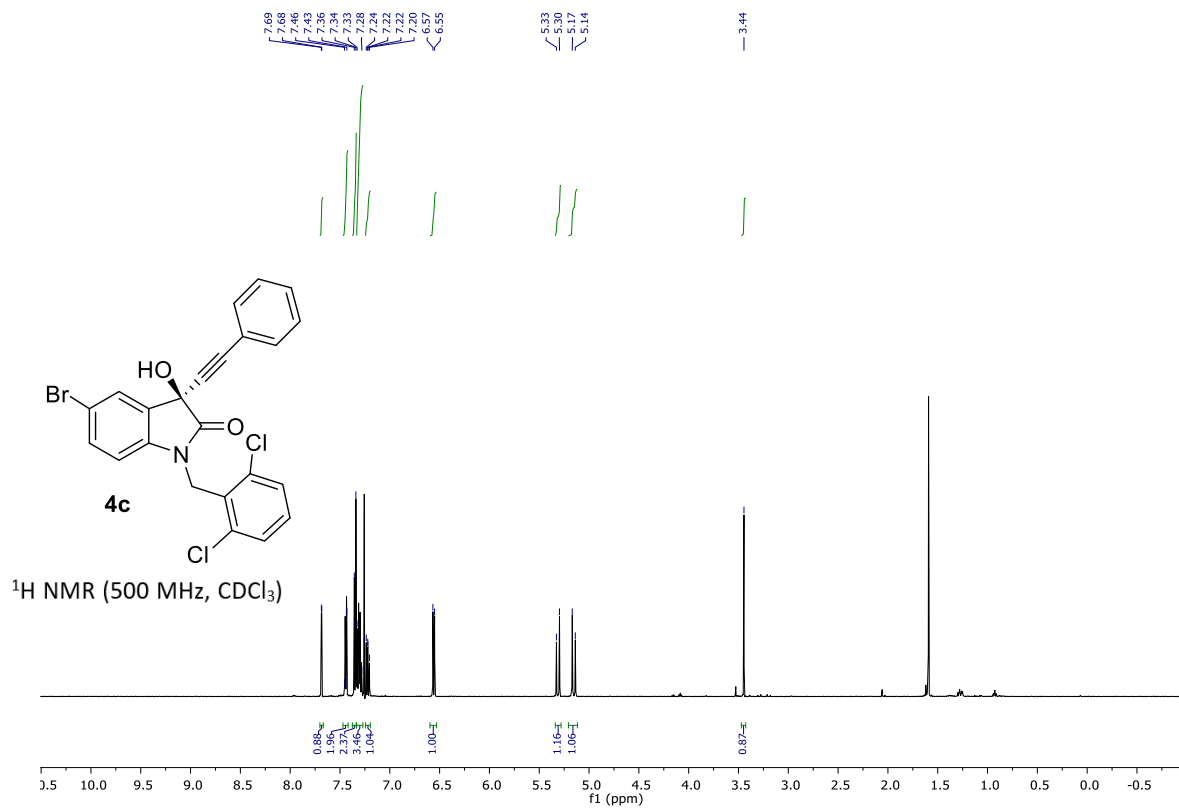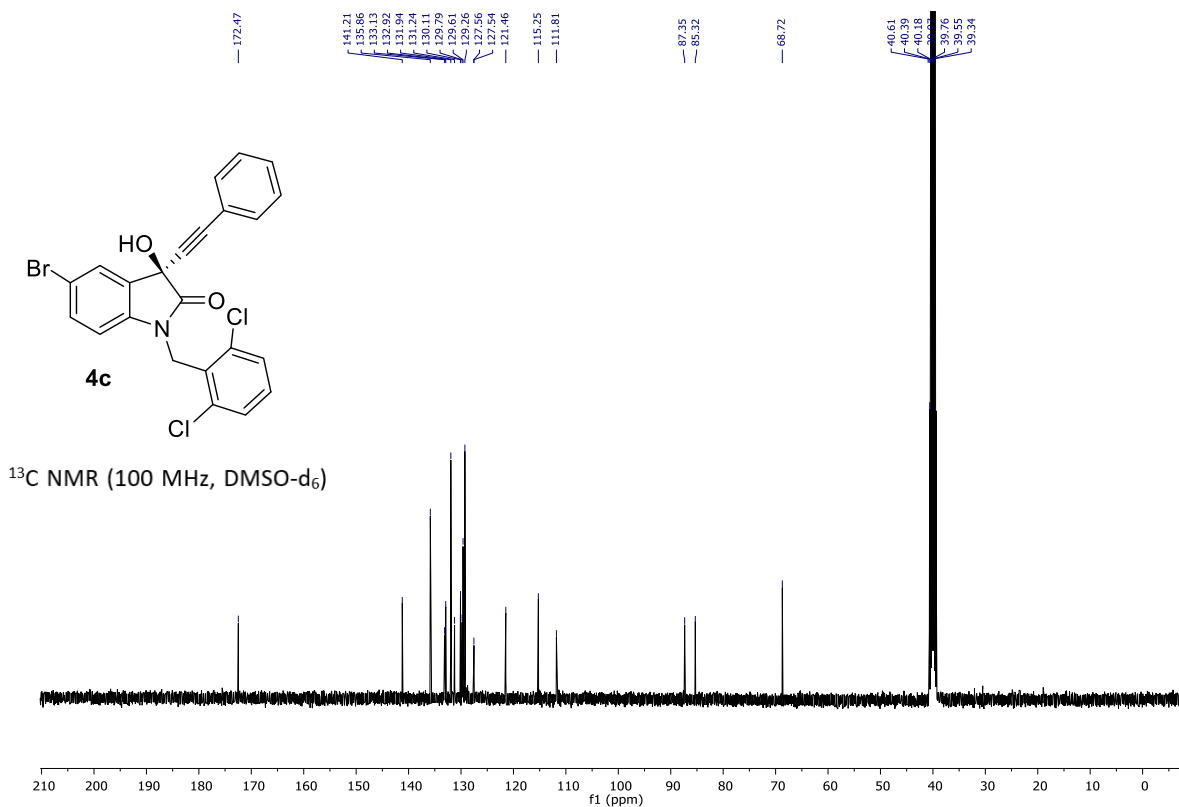

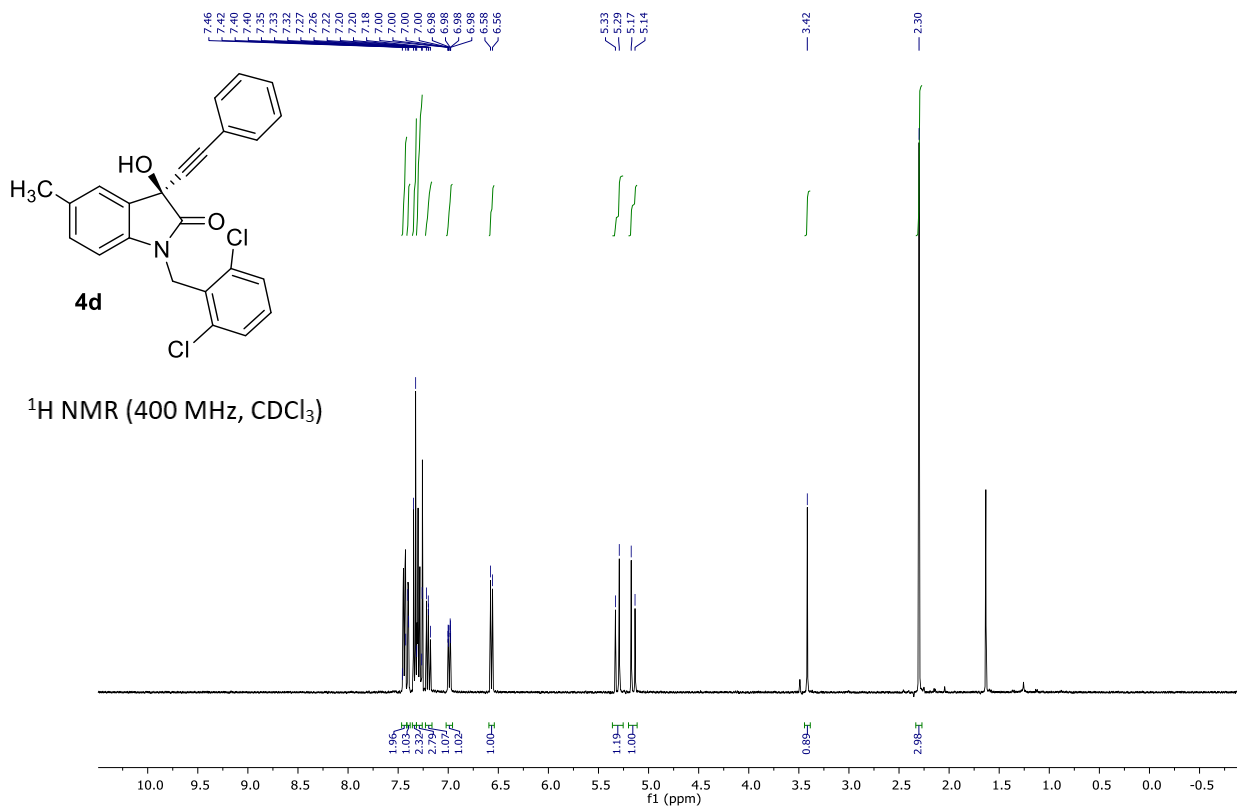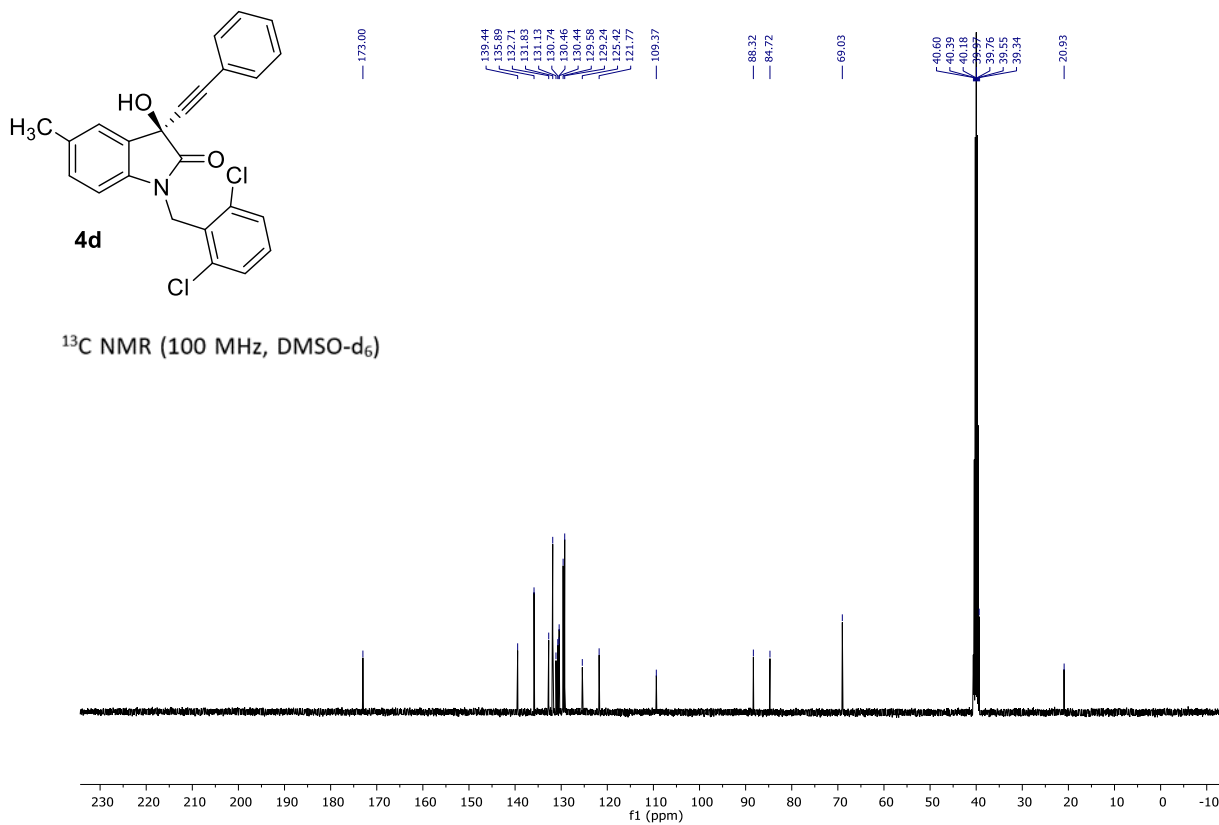

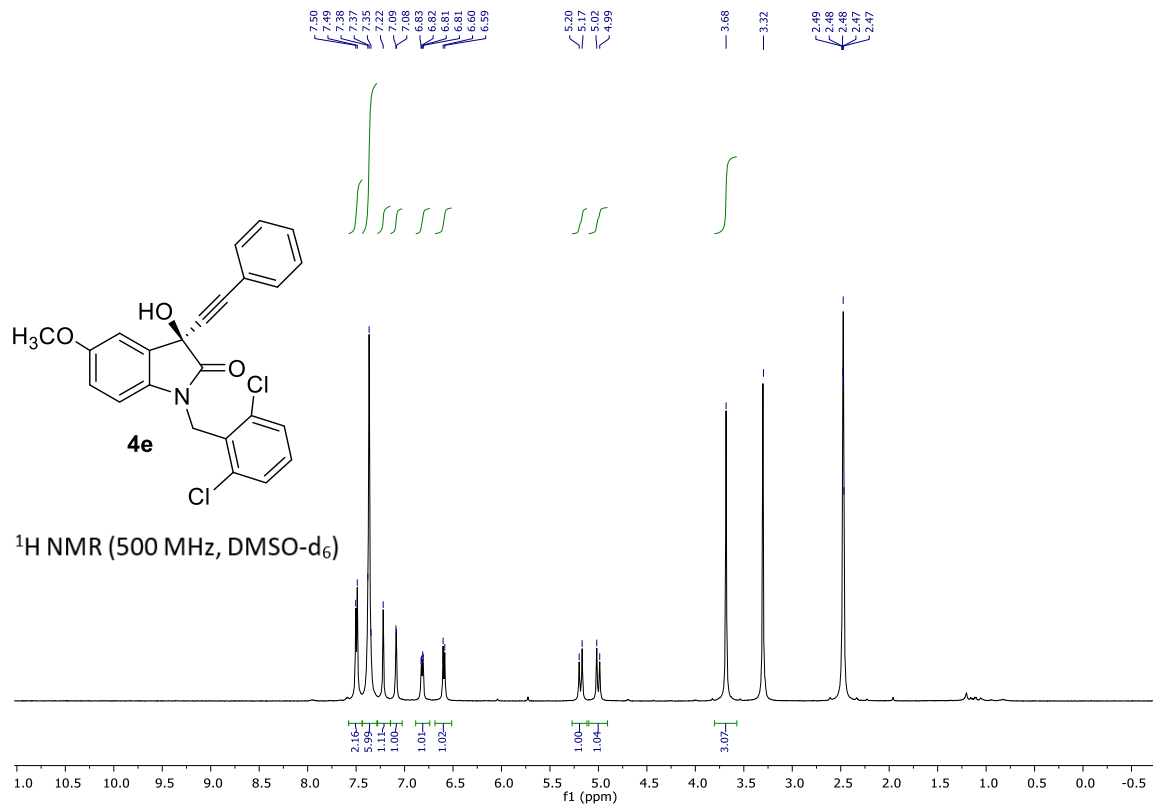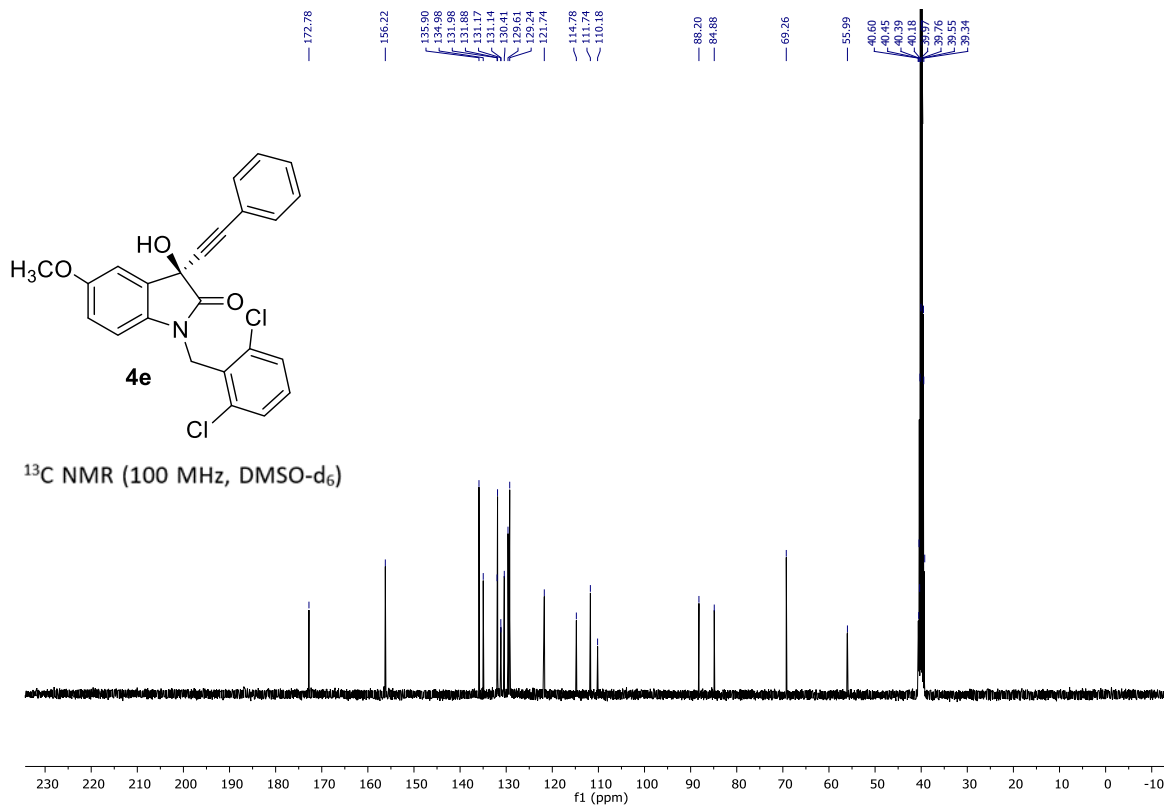

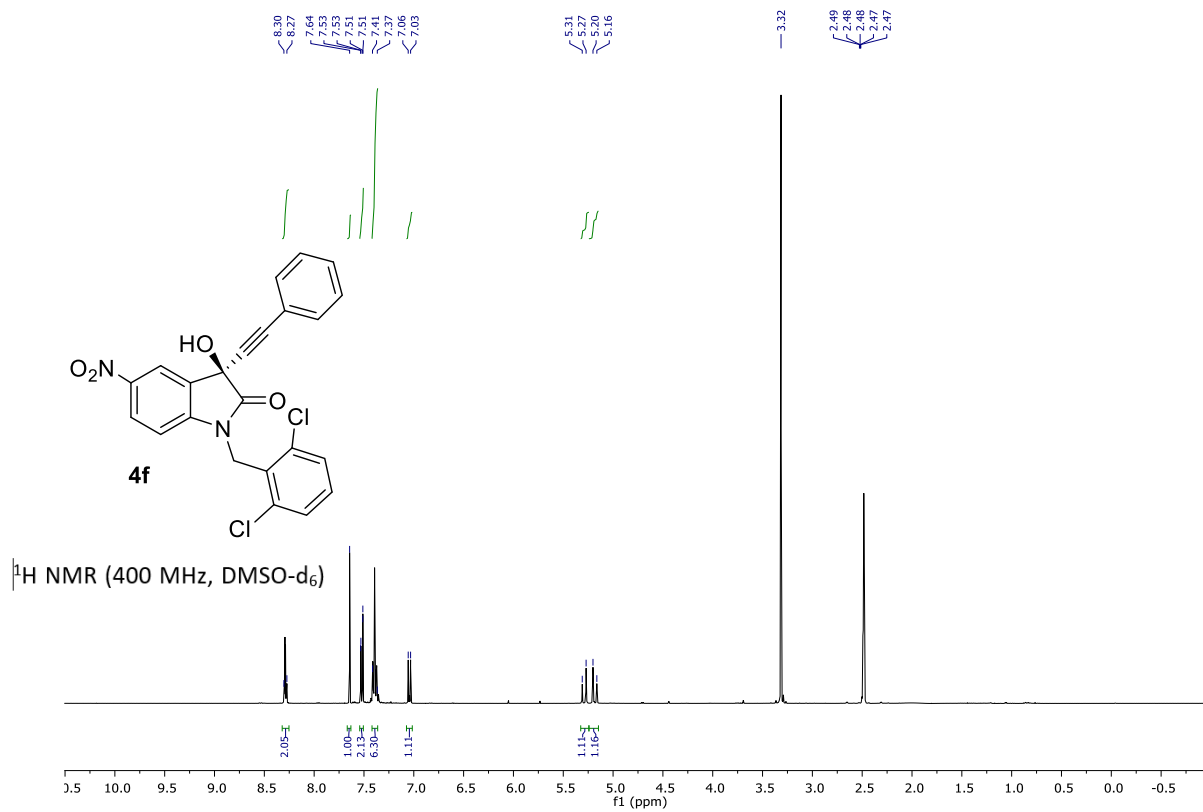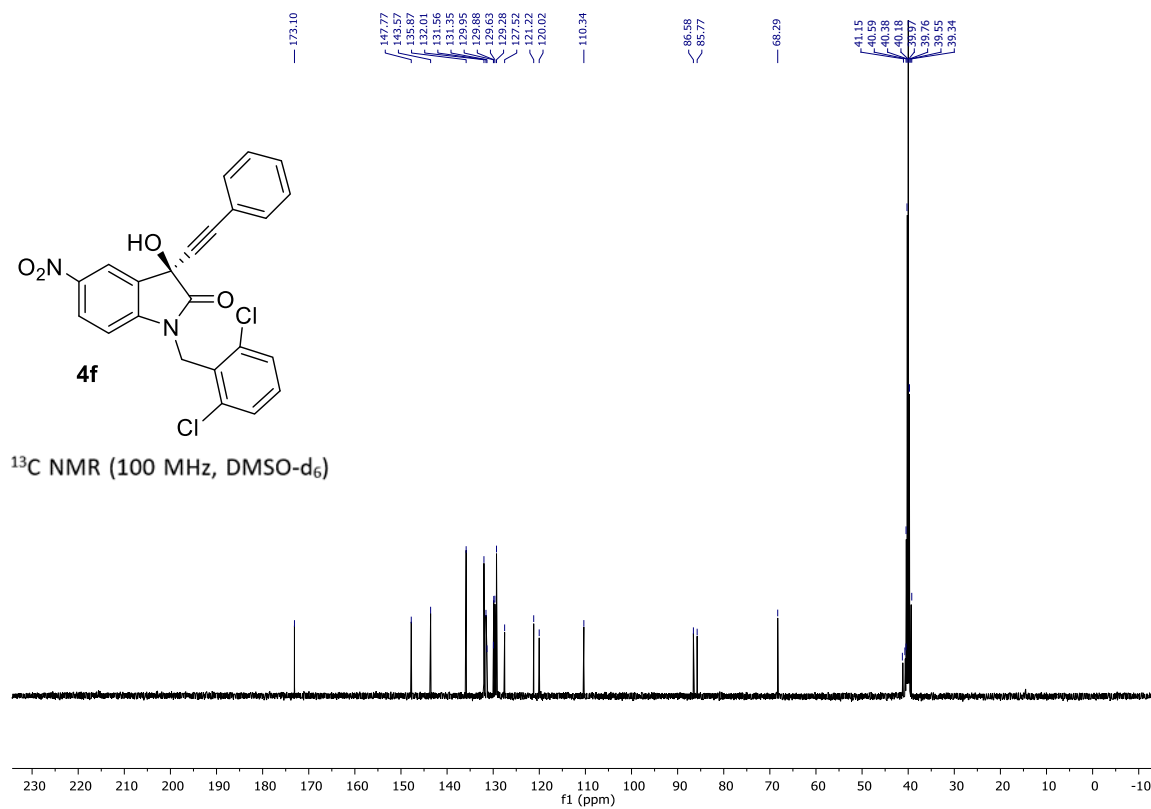

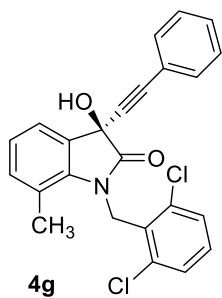

**4g**

$^1\text{H}$  NMR (500 MHz,  $\text{DMSO-d}_6$ )

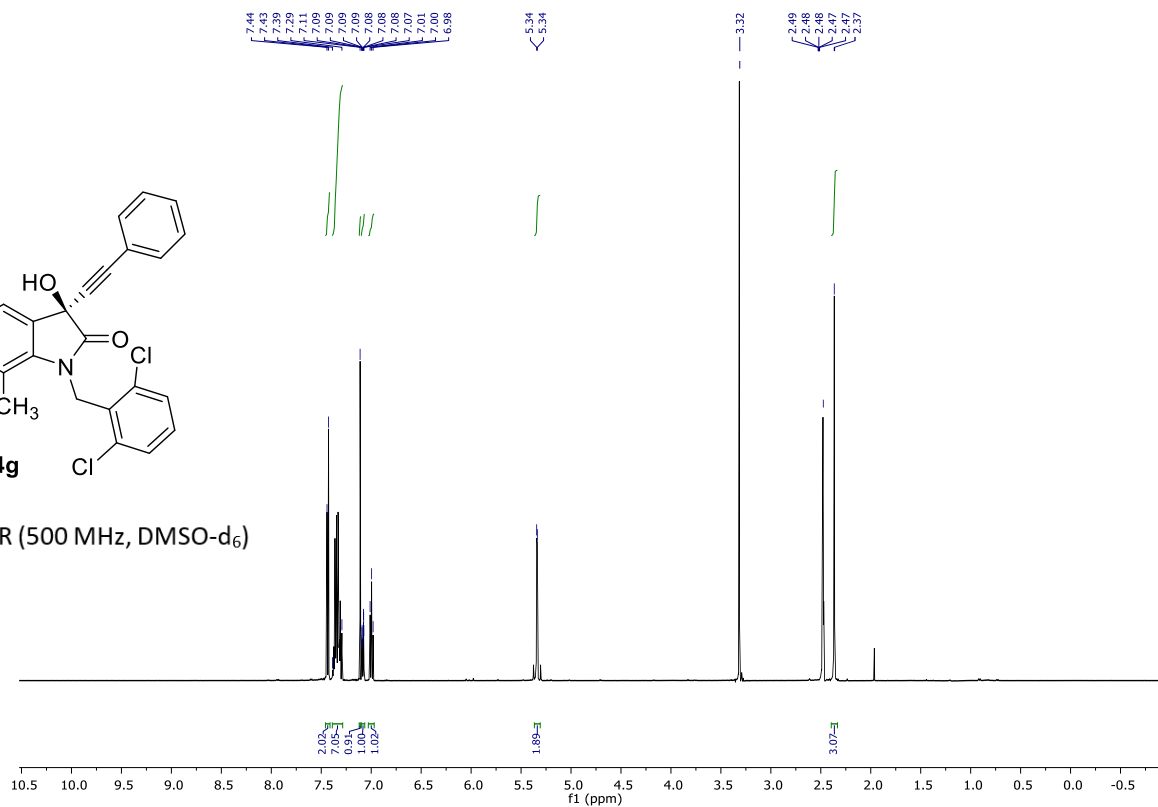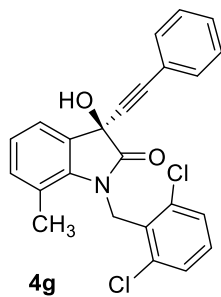

**4g**

$^{13}\text{C}$  NMR (100 MHz,  $\text{DMSO-d}_6$ )

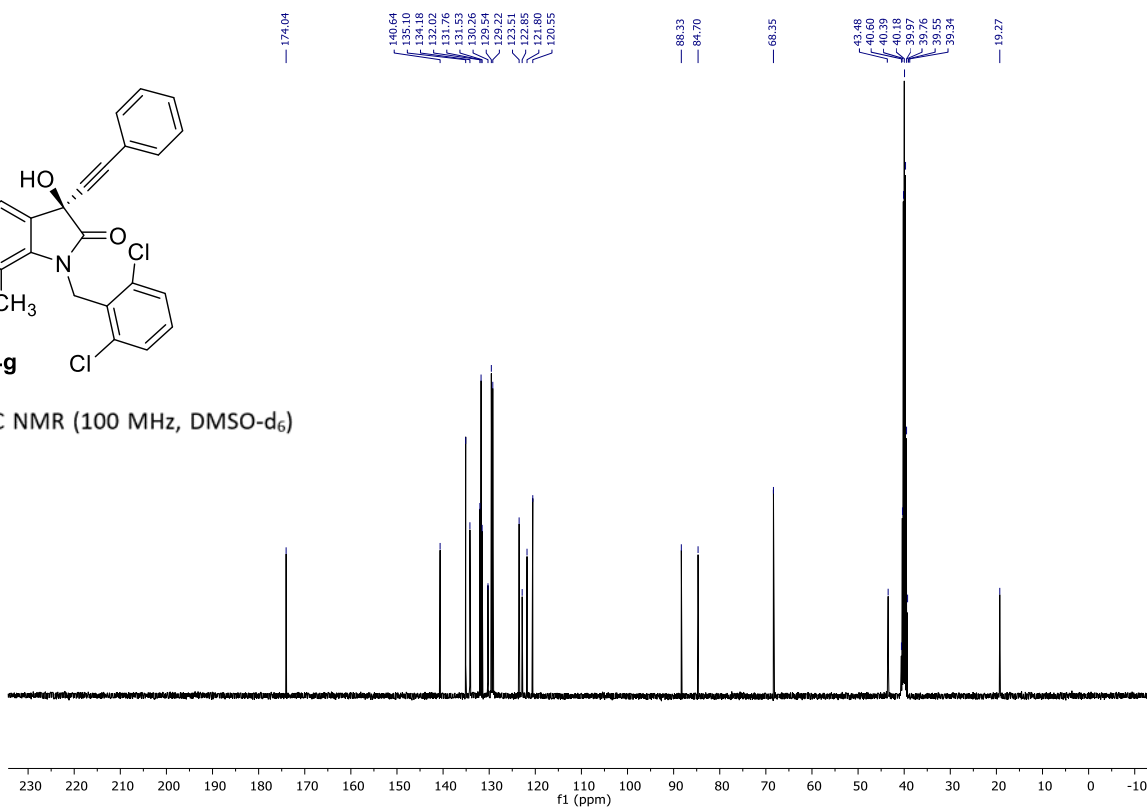



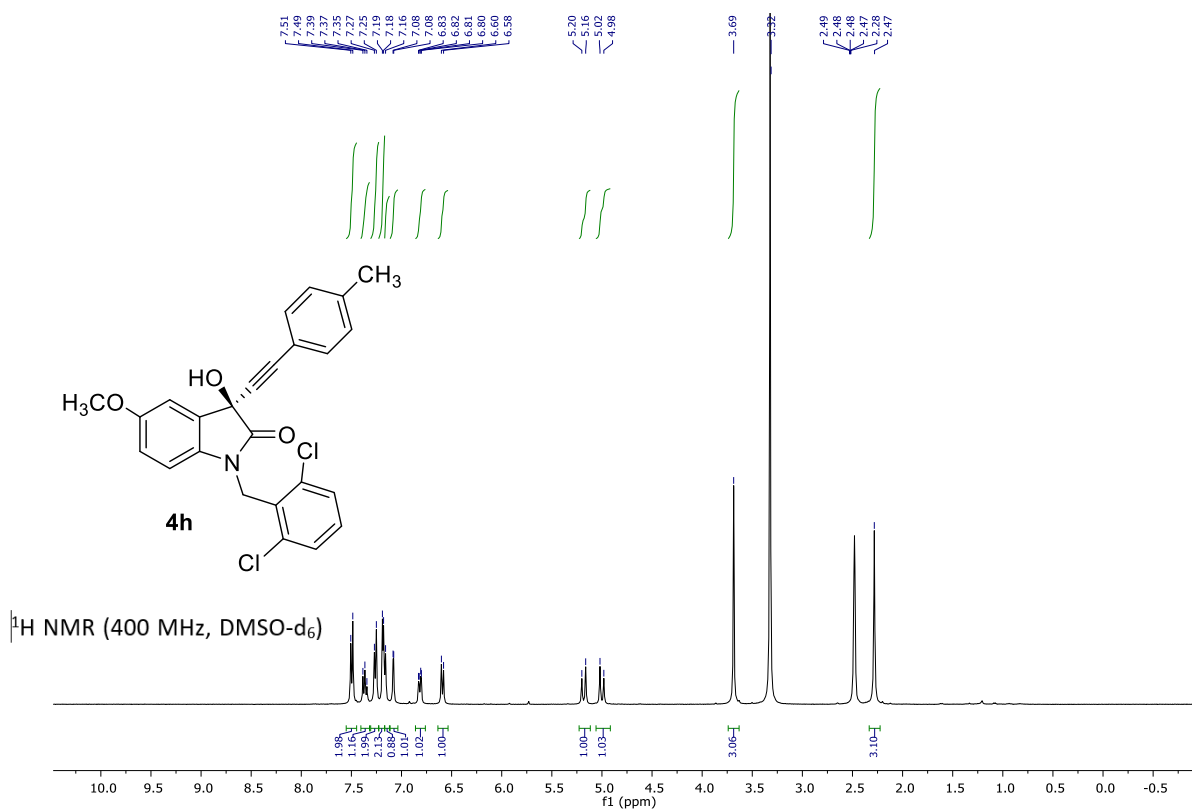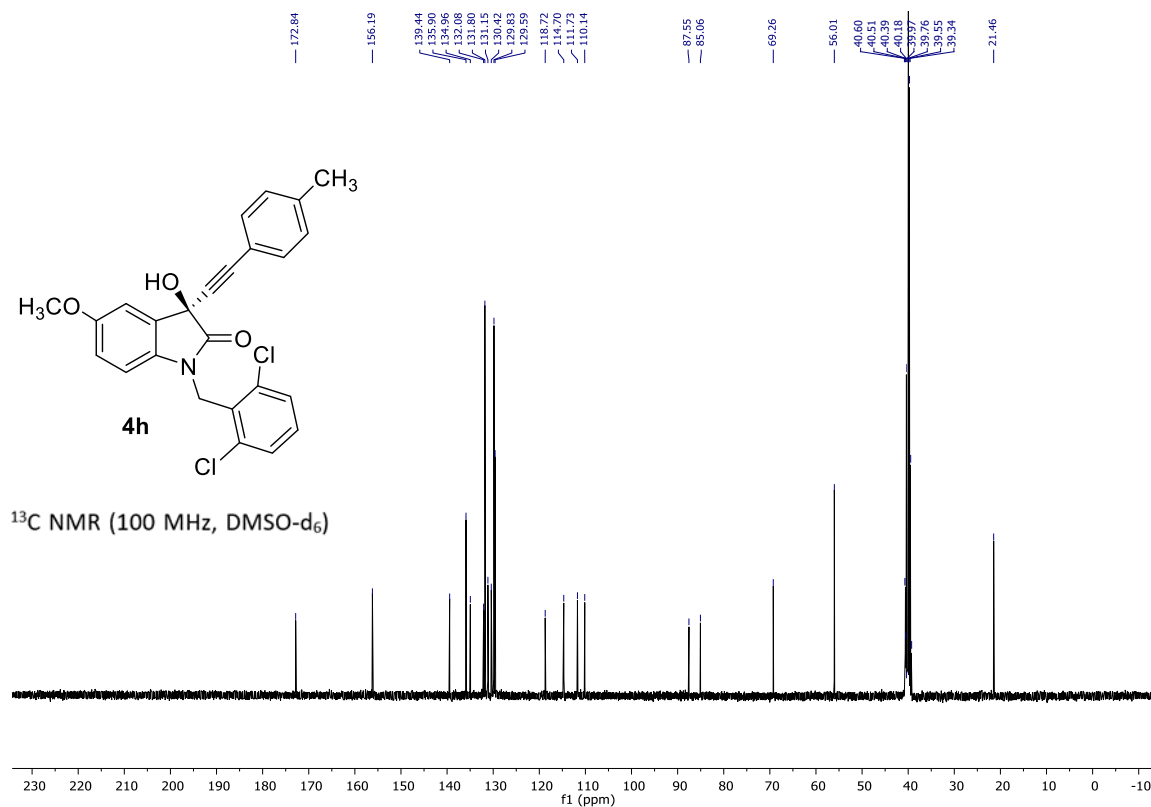

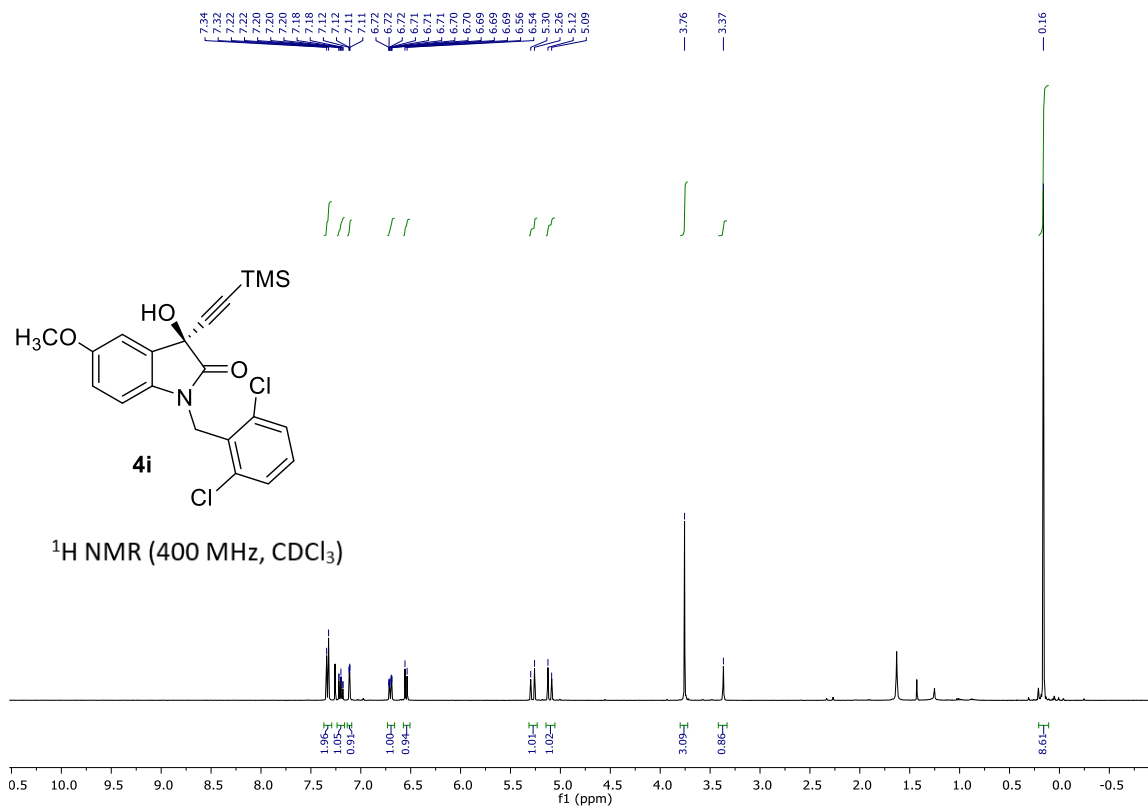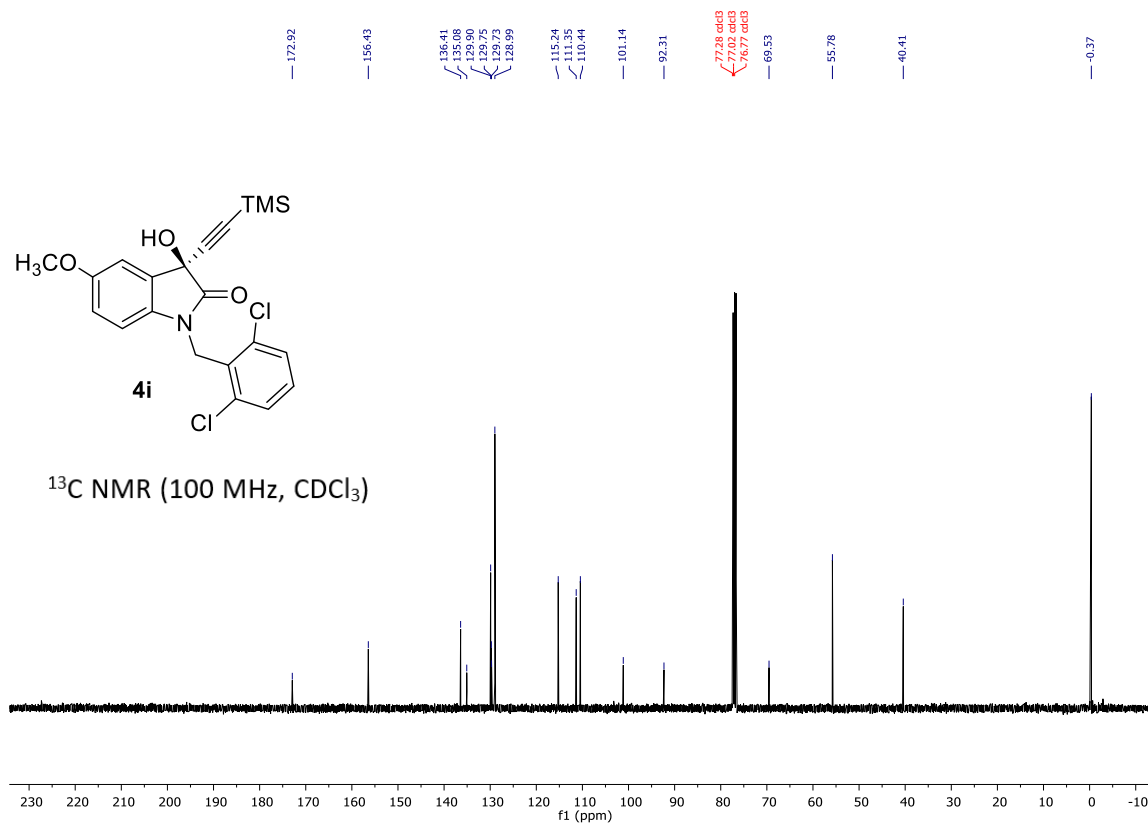

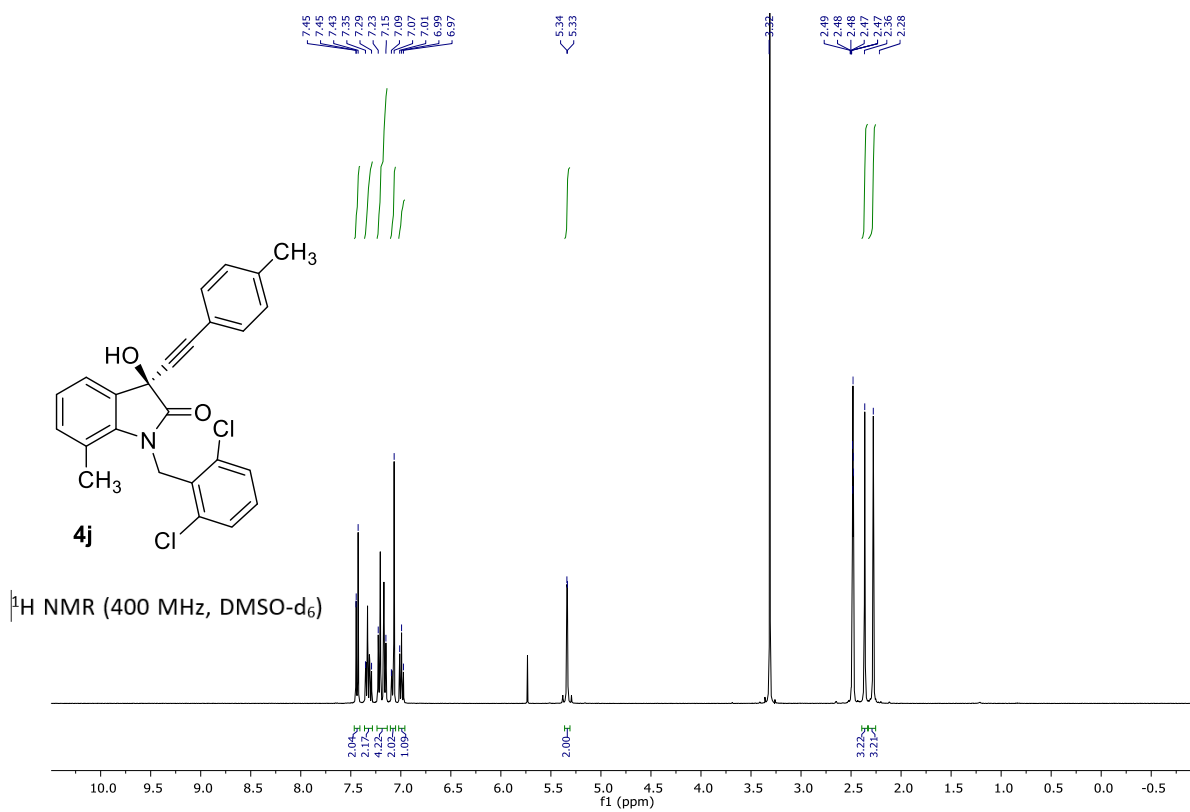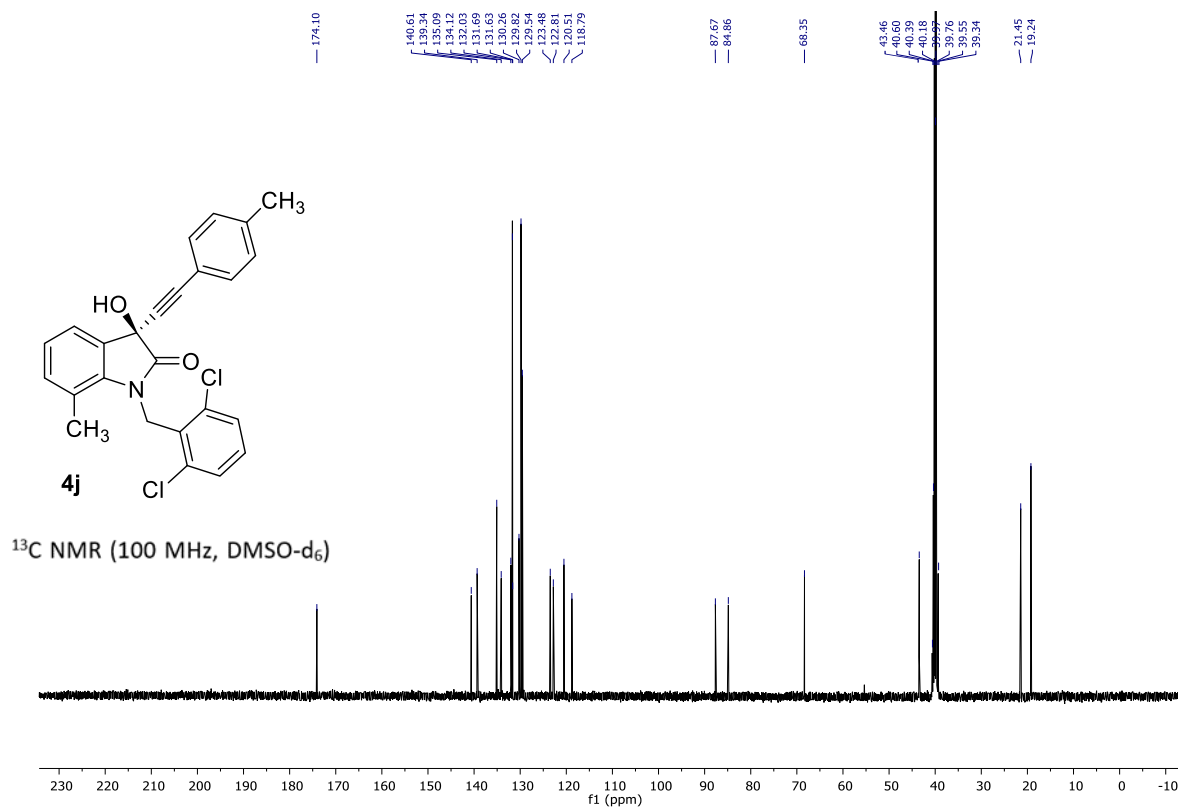

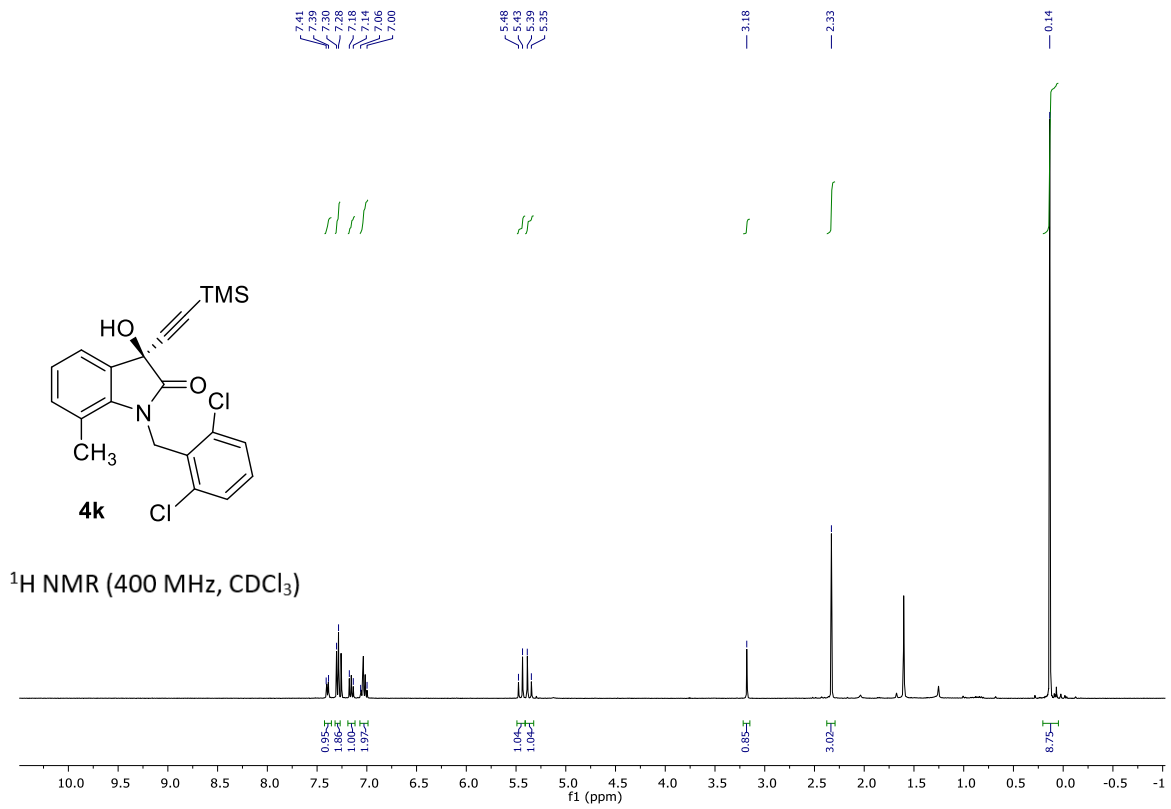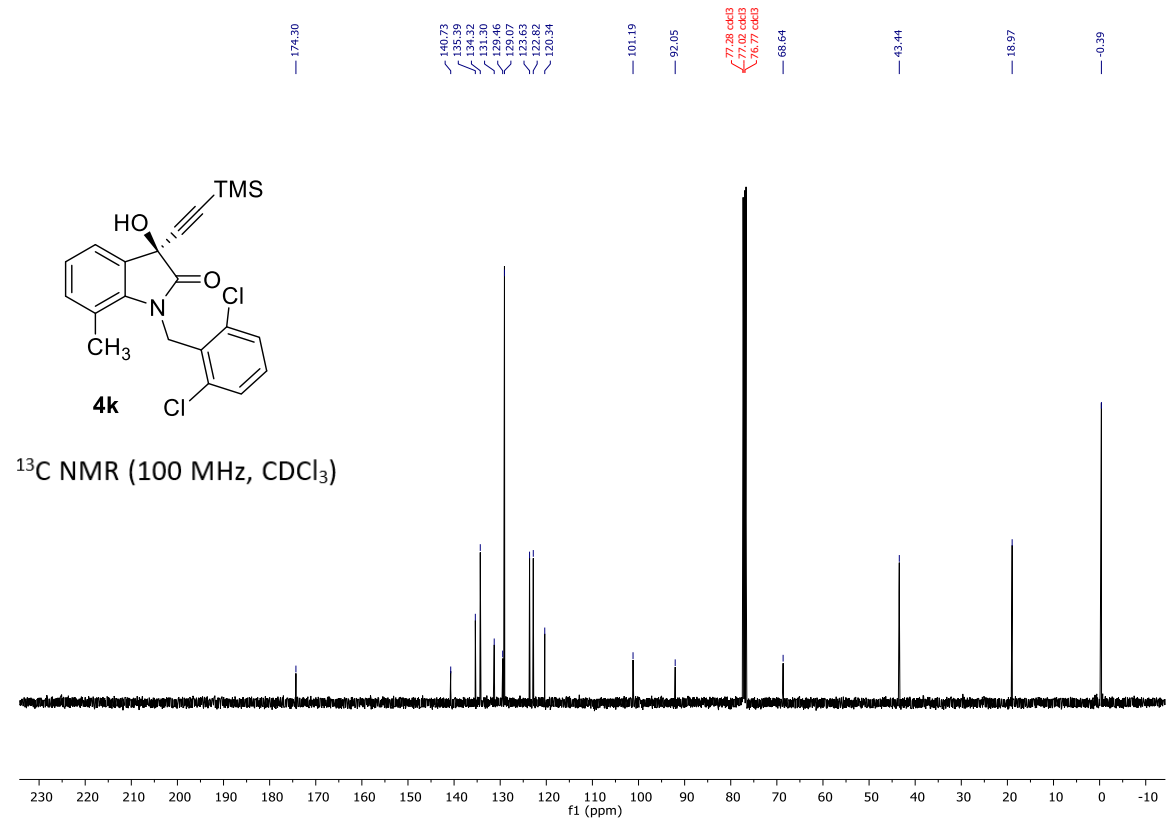

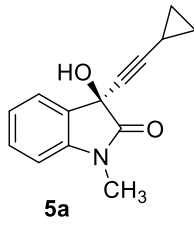

$^1\text{H NMR}$  (400 MHz,  $\text{CDCl}_3$ )

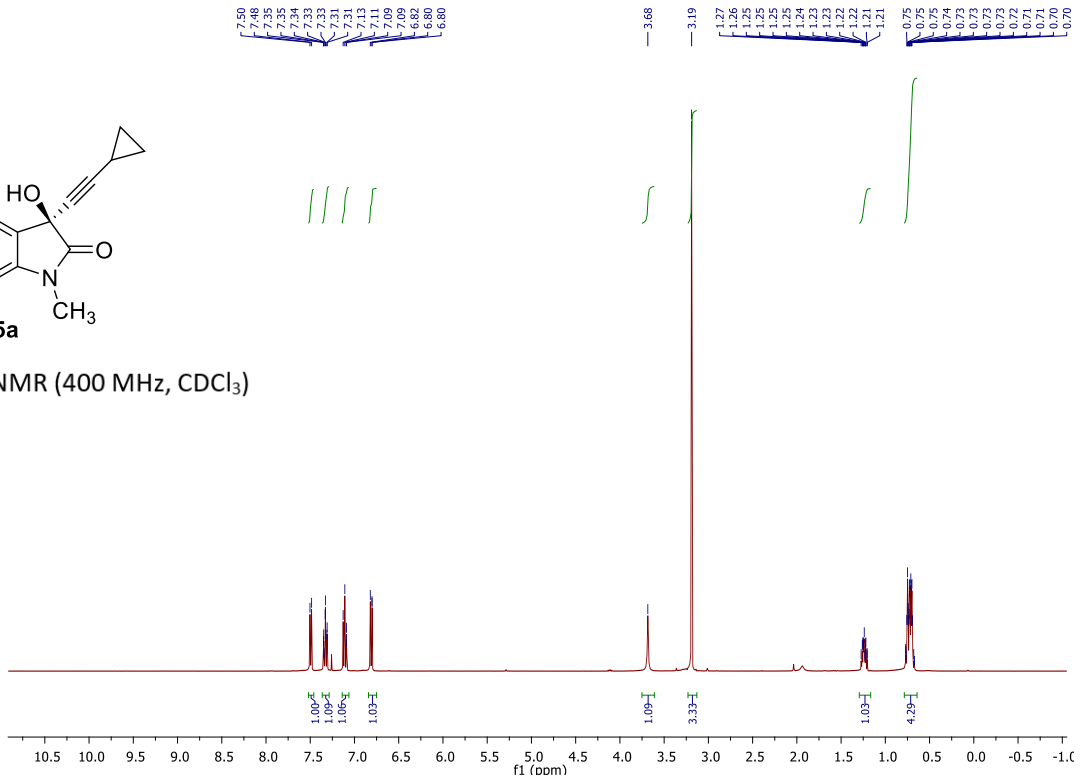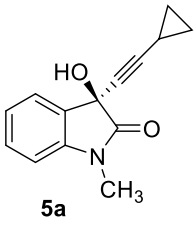

$^{13}\text{C NMR}$  (100 MHz,  $\text{CDCl}_3$ )

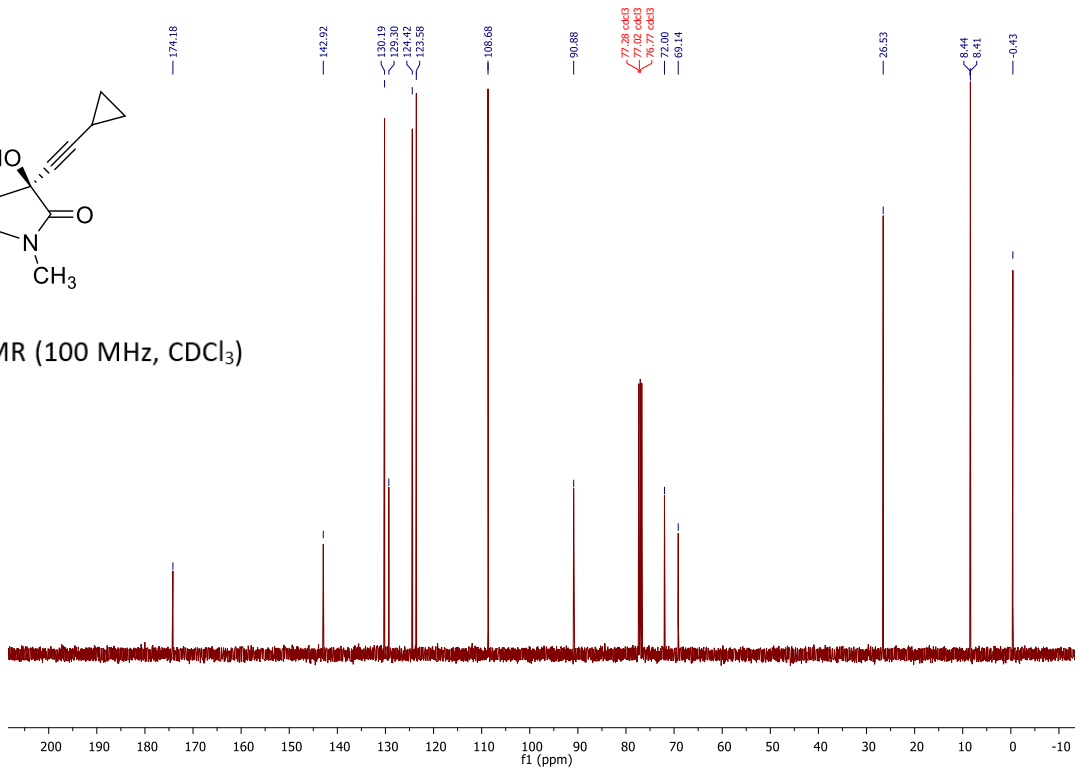

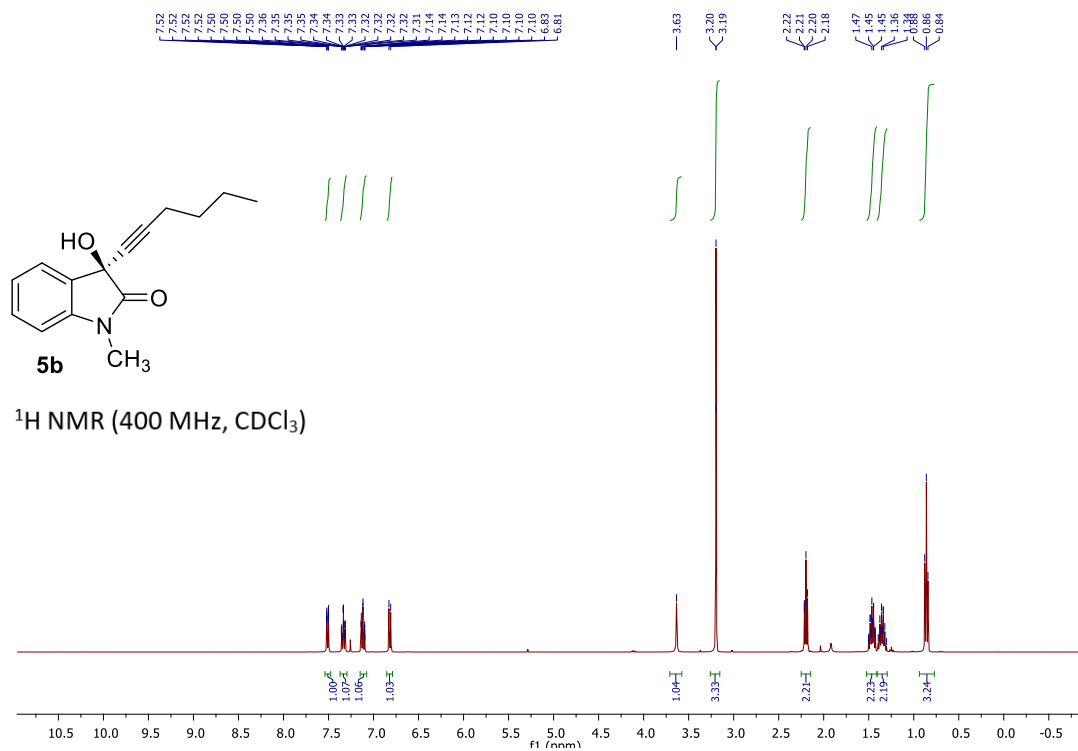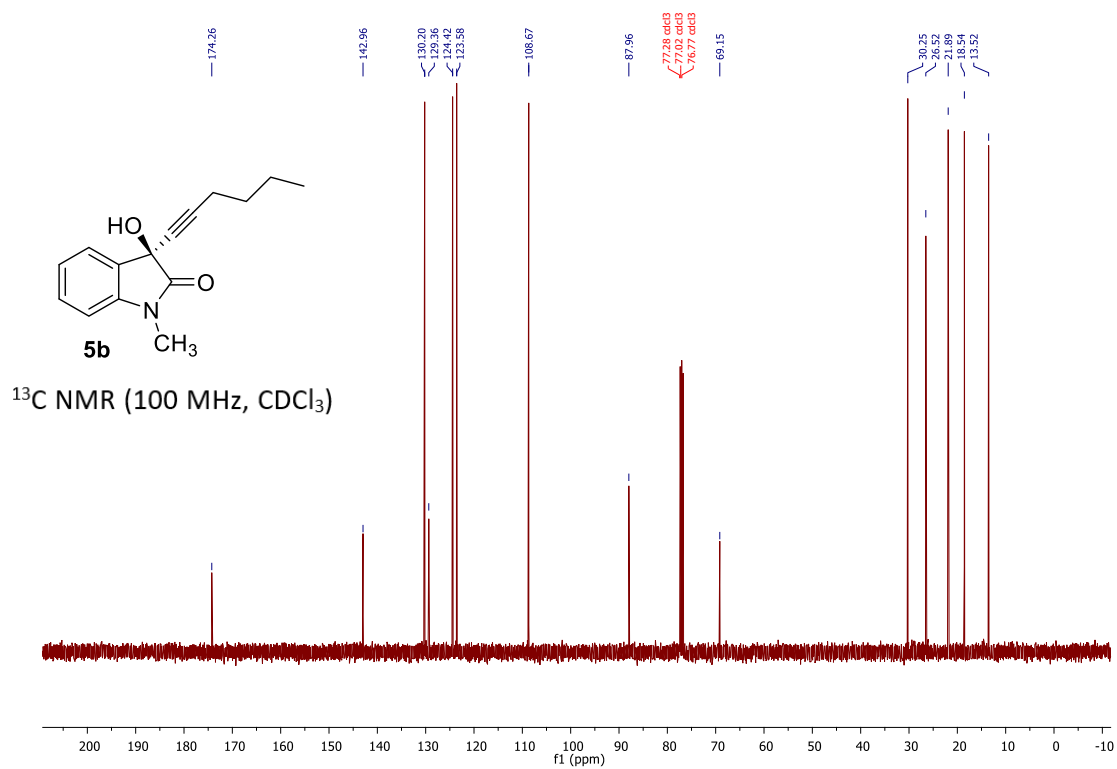

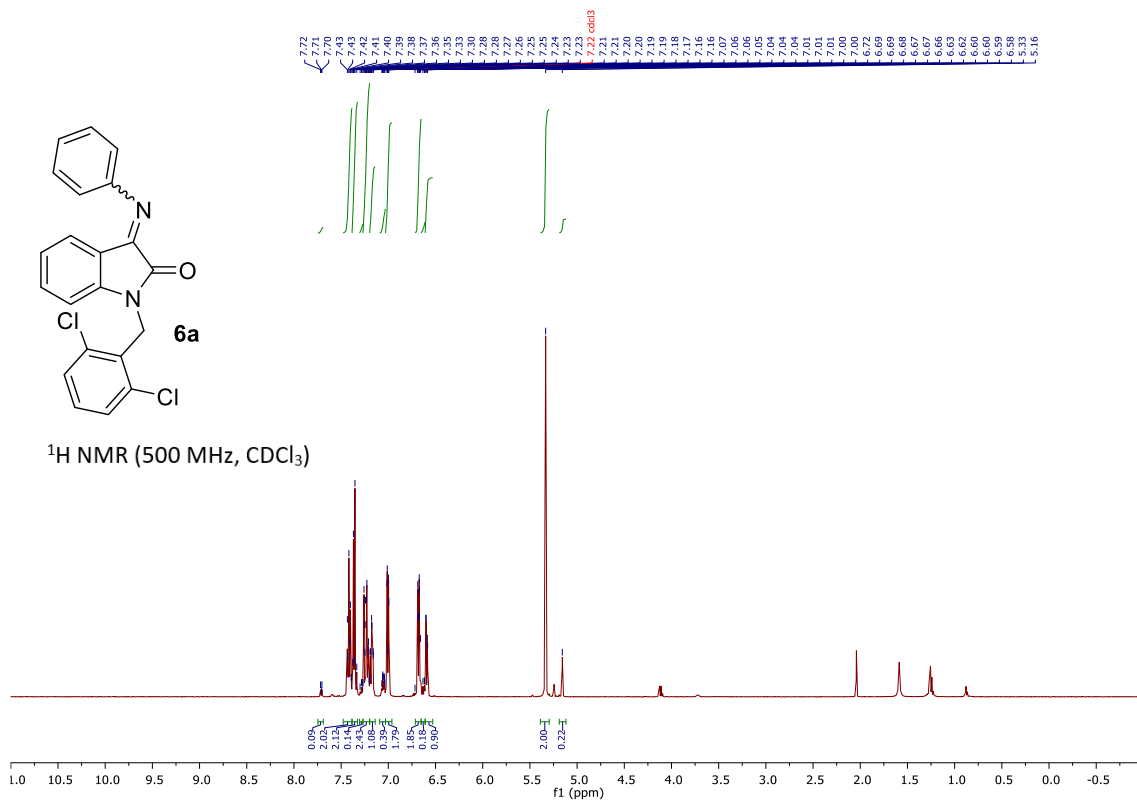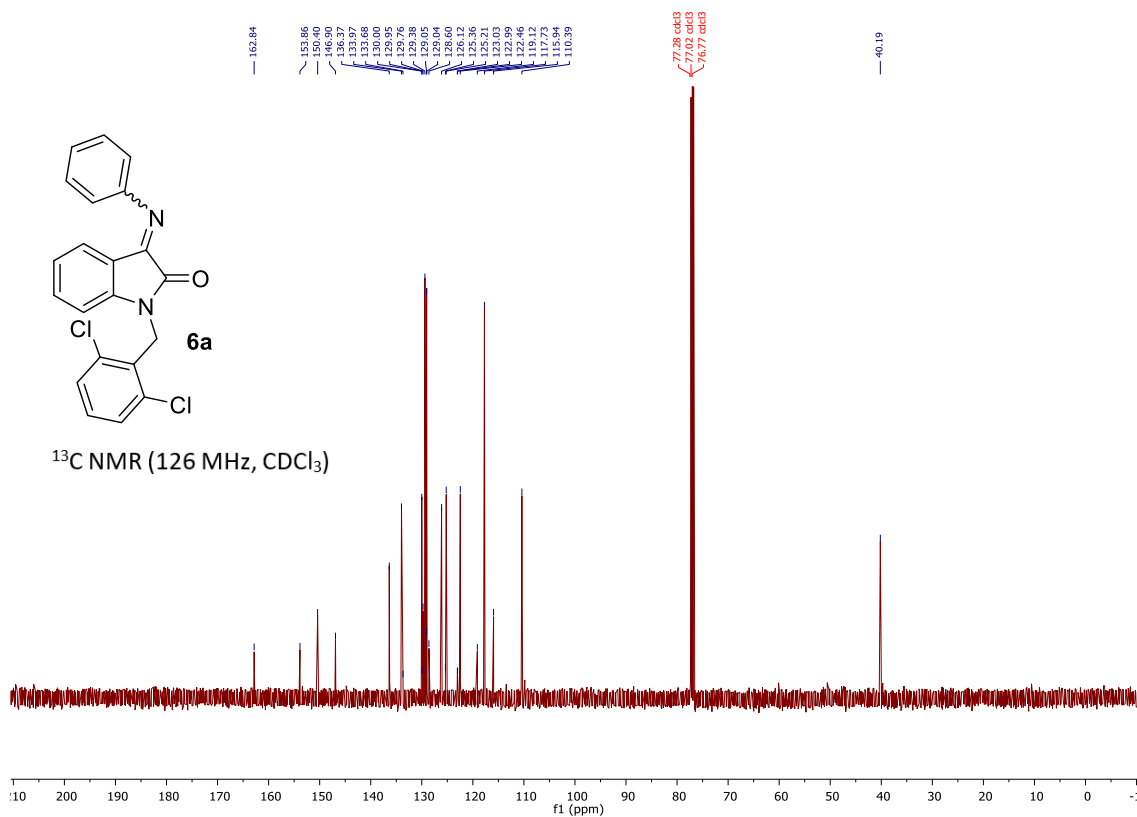

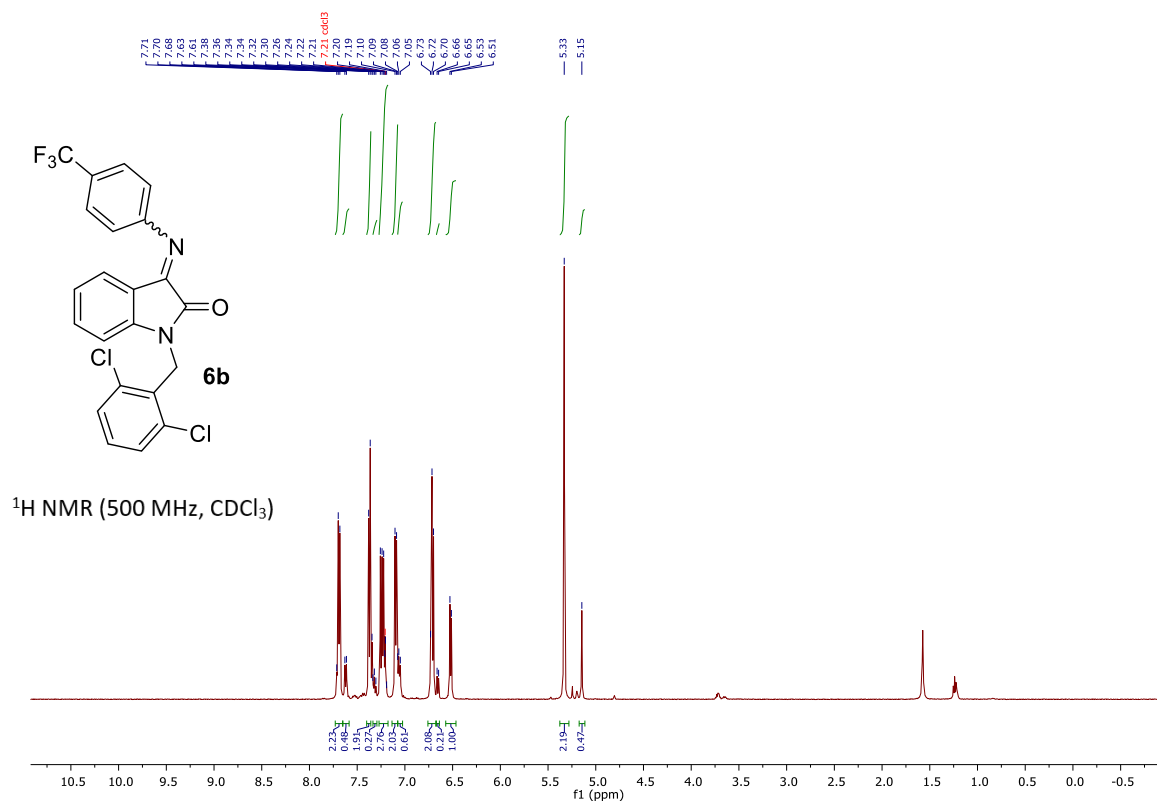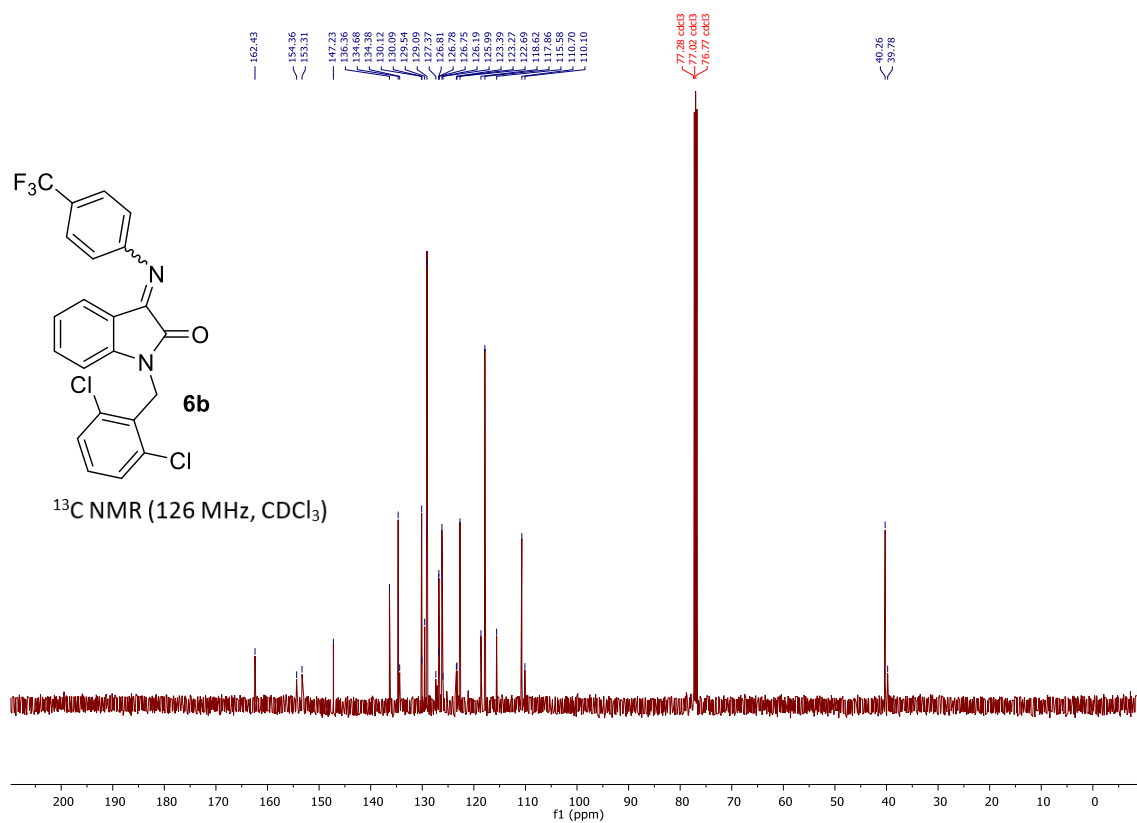



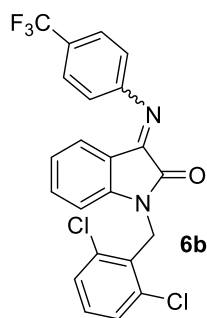

$^{19}\text{F}$  NMR (470 MHz,  $\text{CDCl}_3$ )

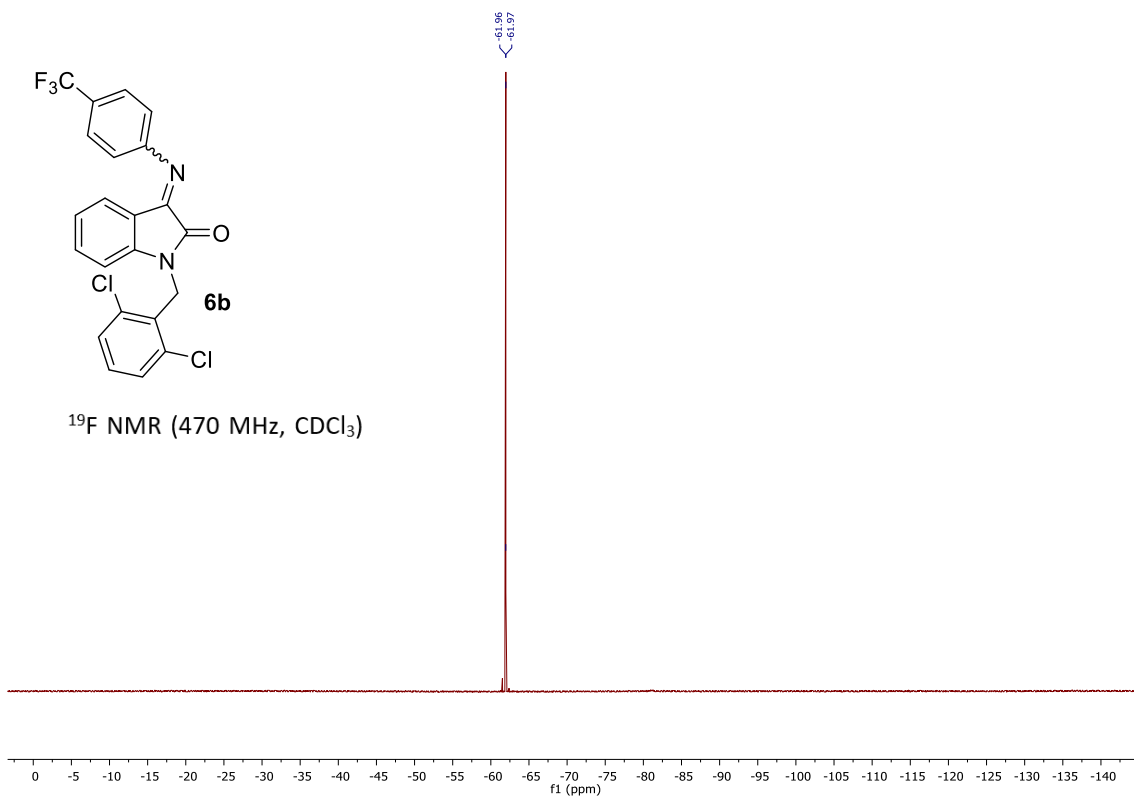

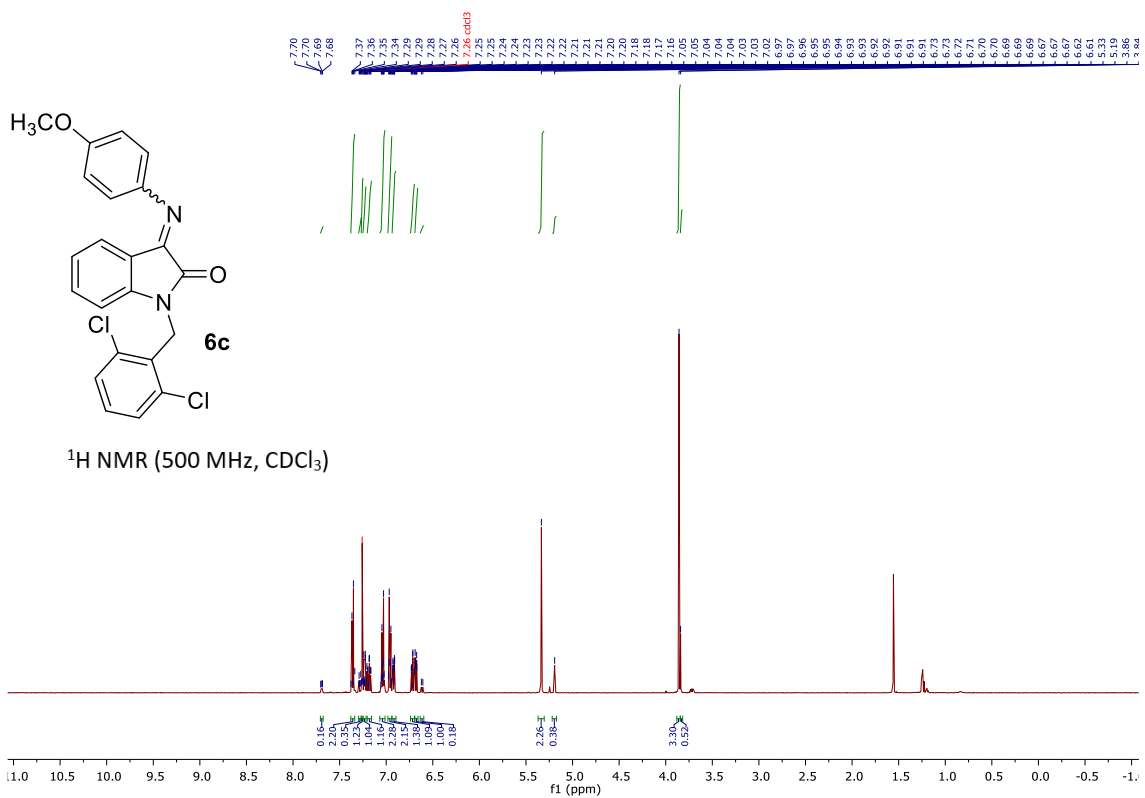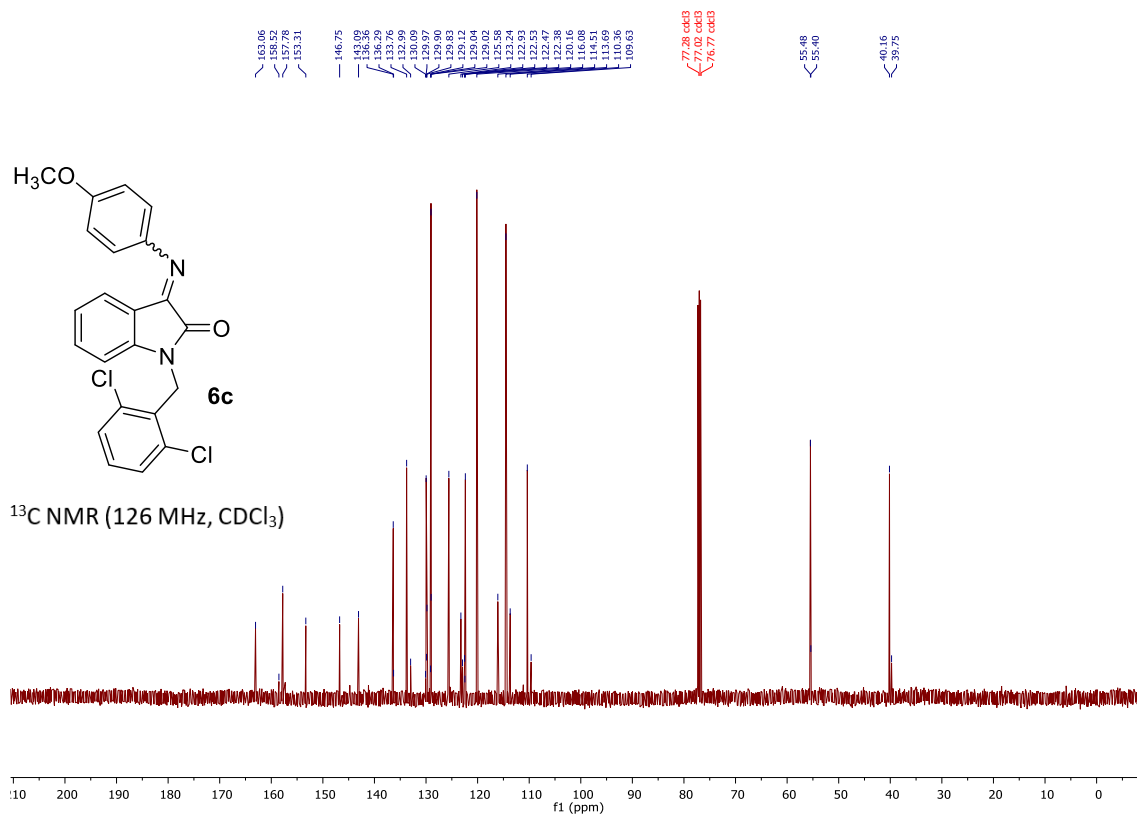

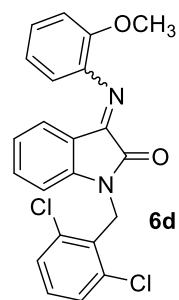

$^1\text{H NMR}$  (500 MHz,  $\text{CDCl}_3$ )

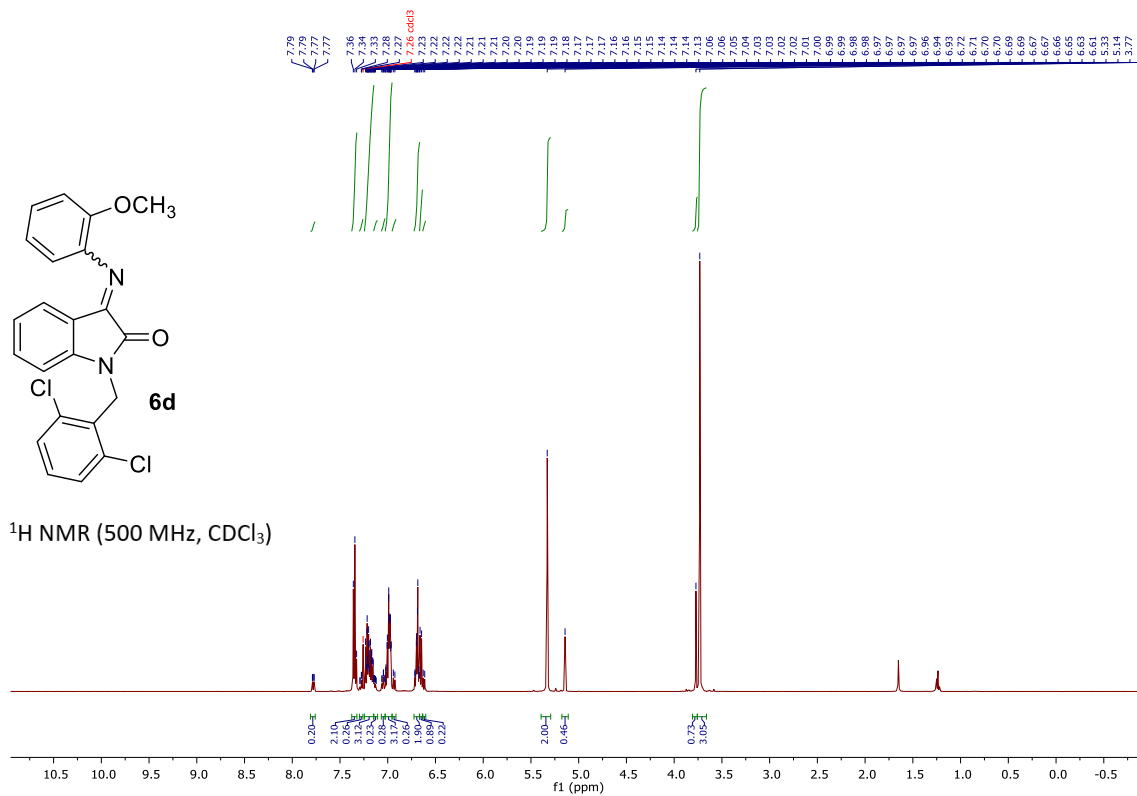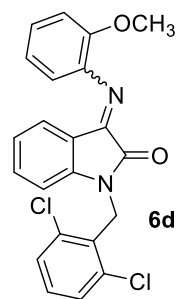

$^{13}\text{C NMR}$  (126 MHz,  $\text{CDCl}_3$ )

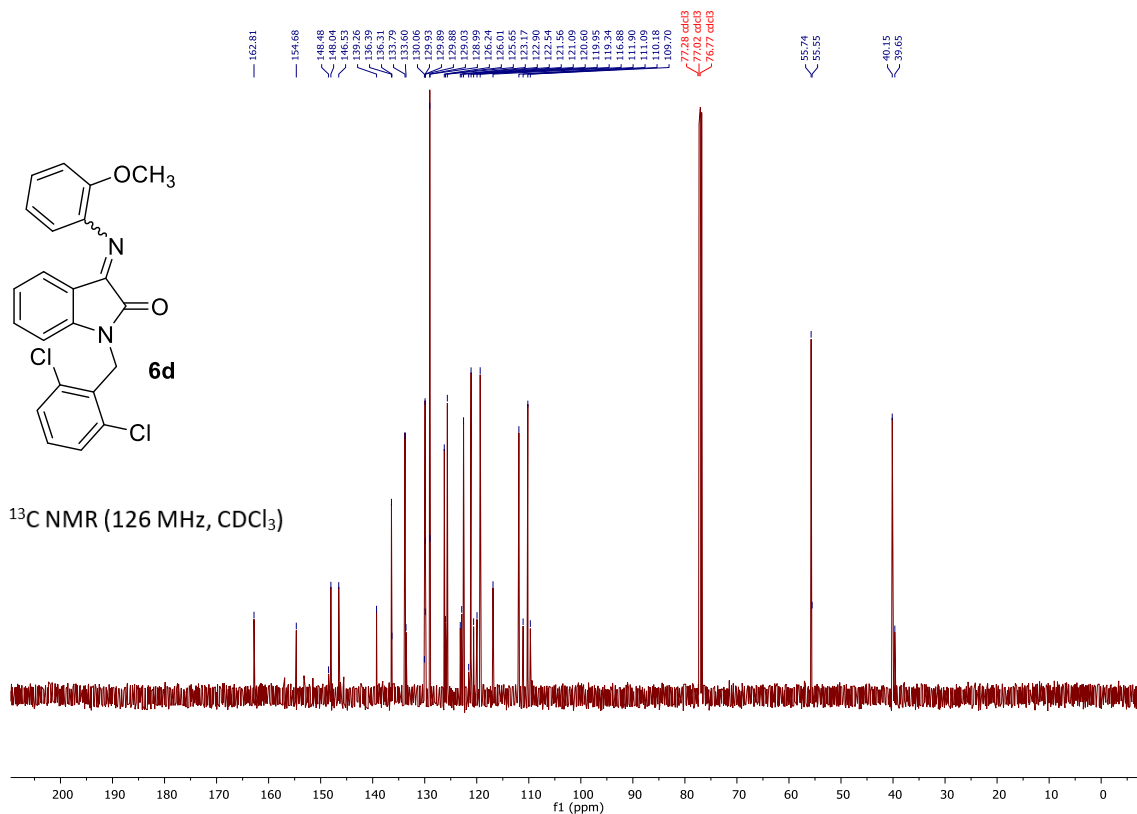

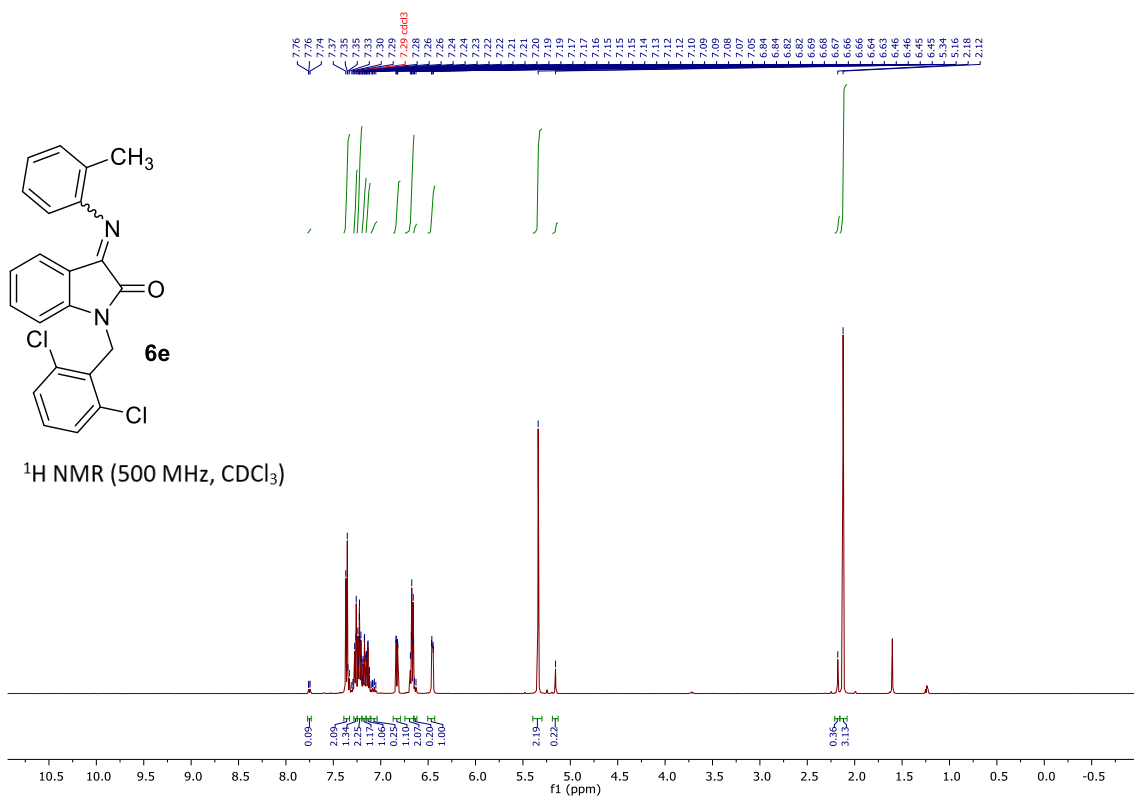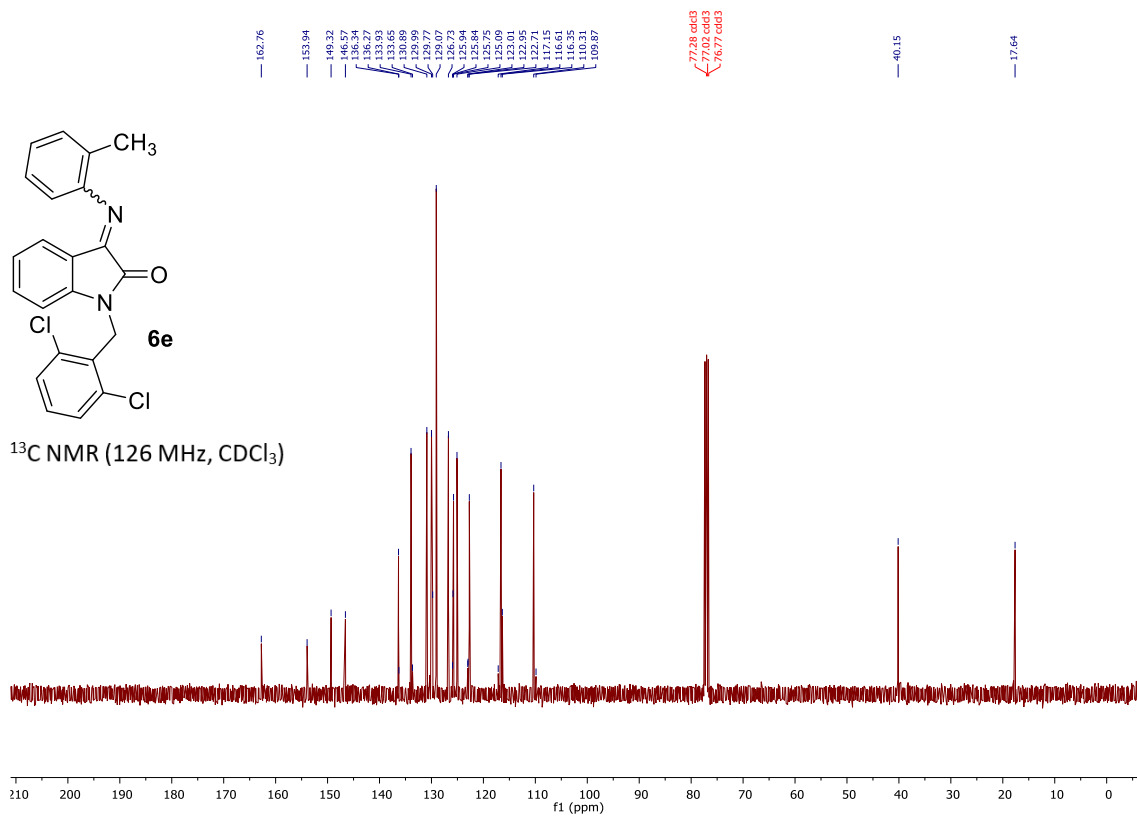



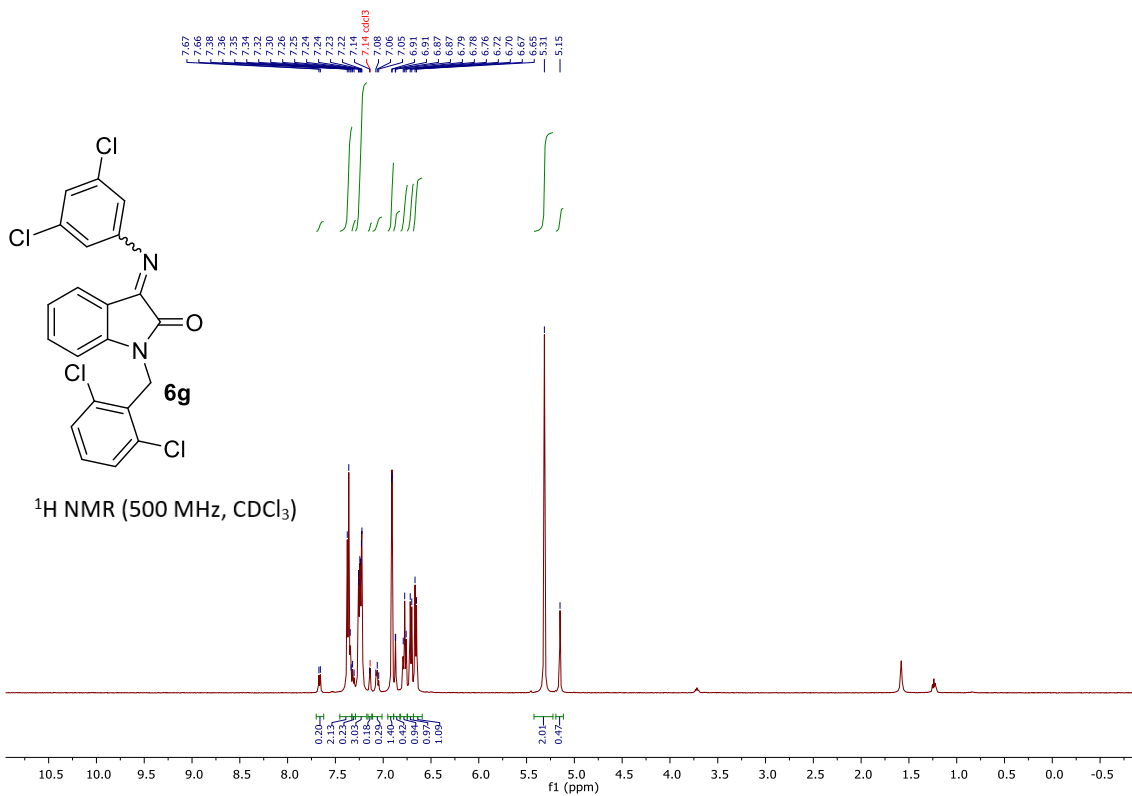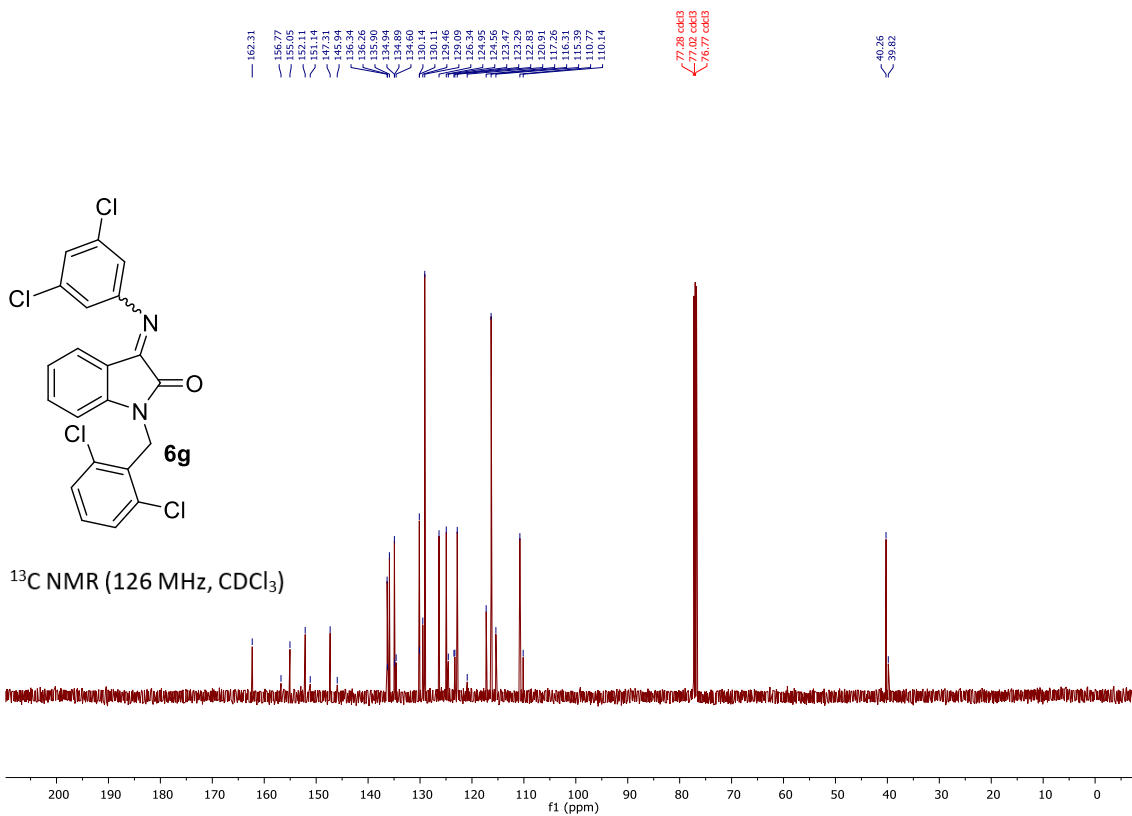



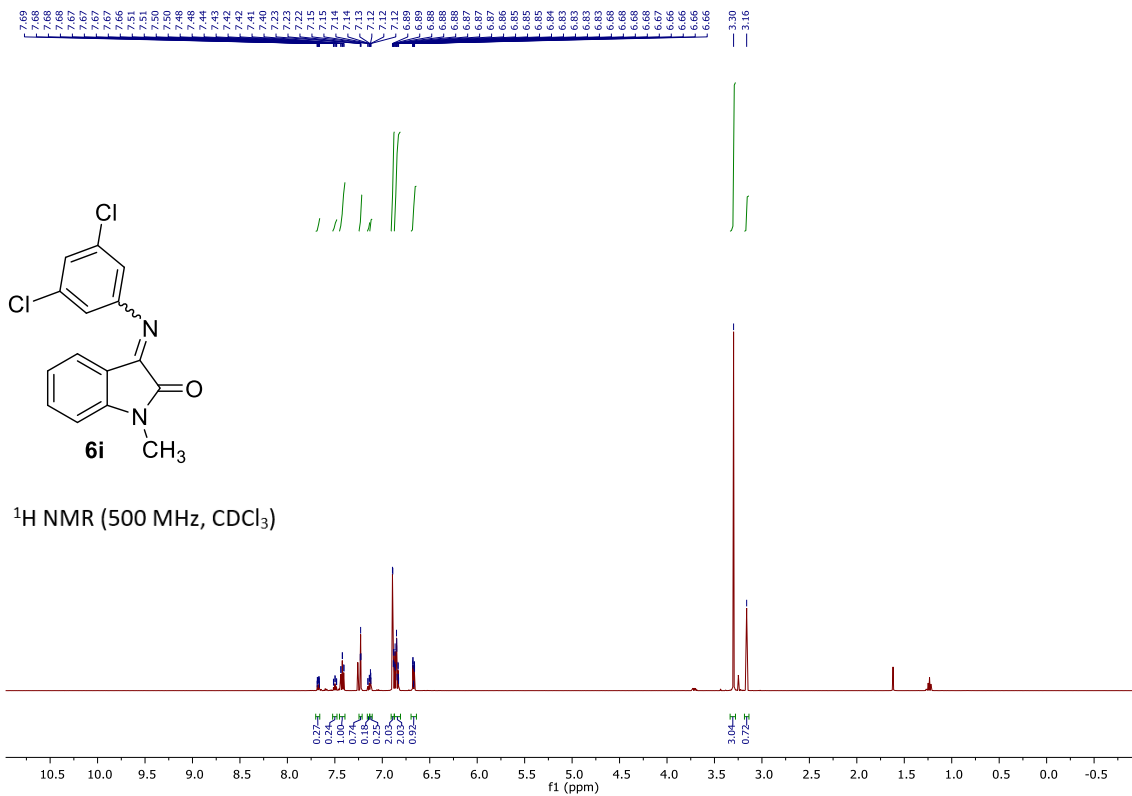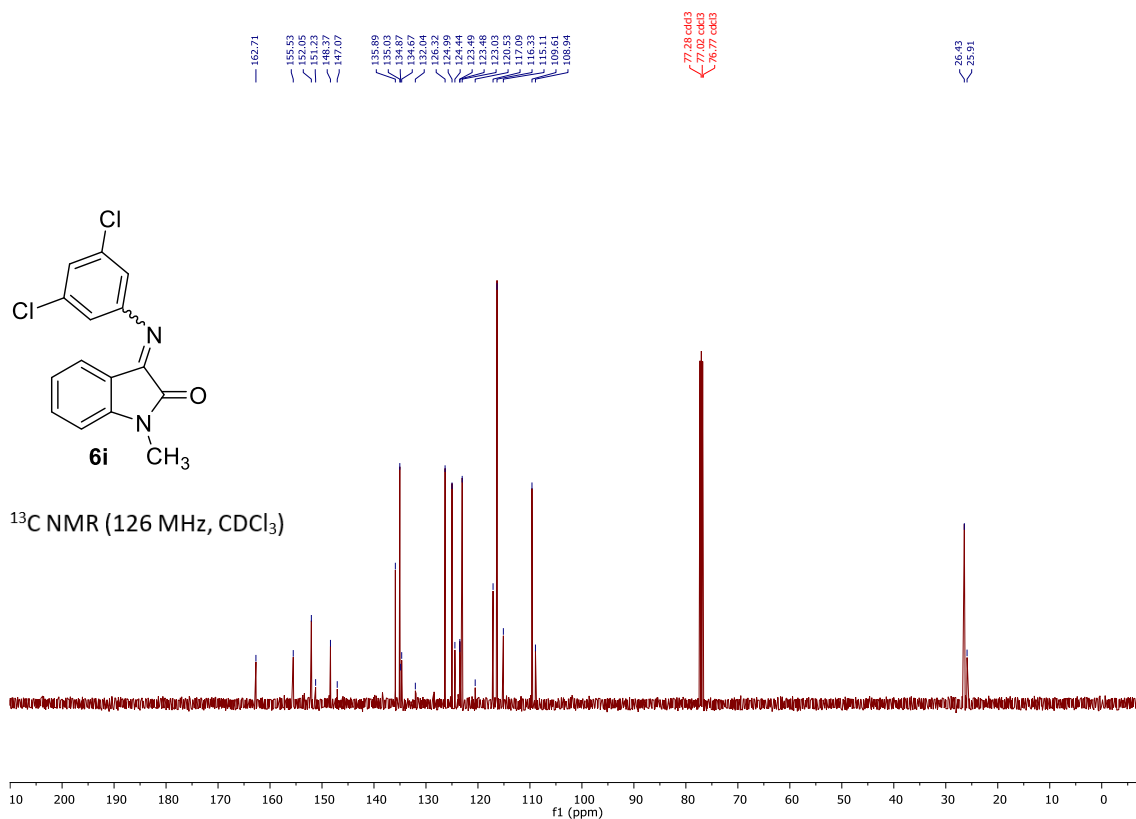





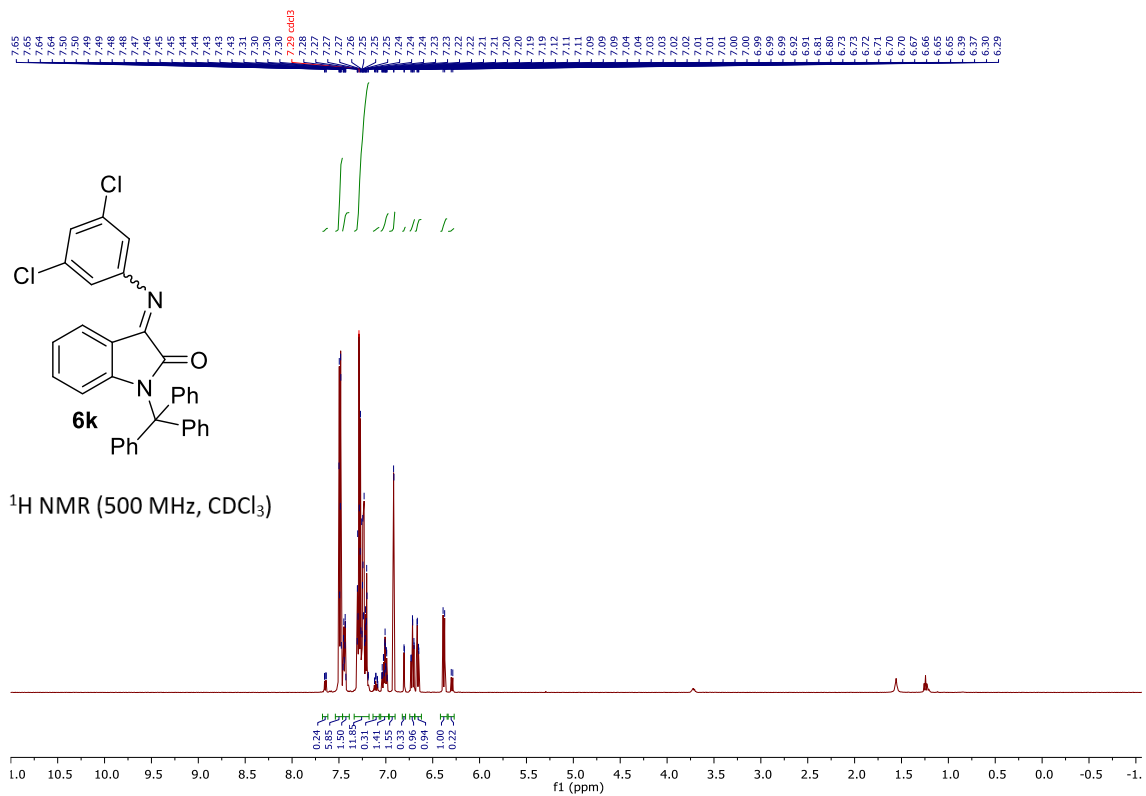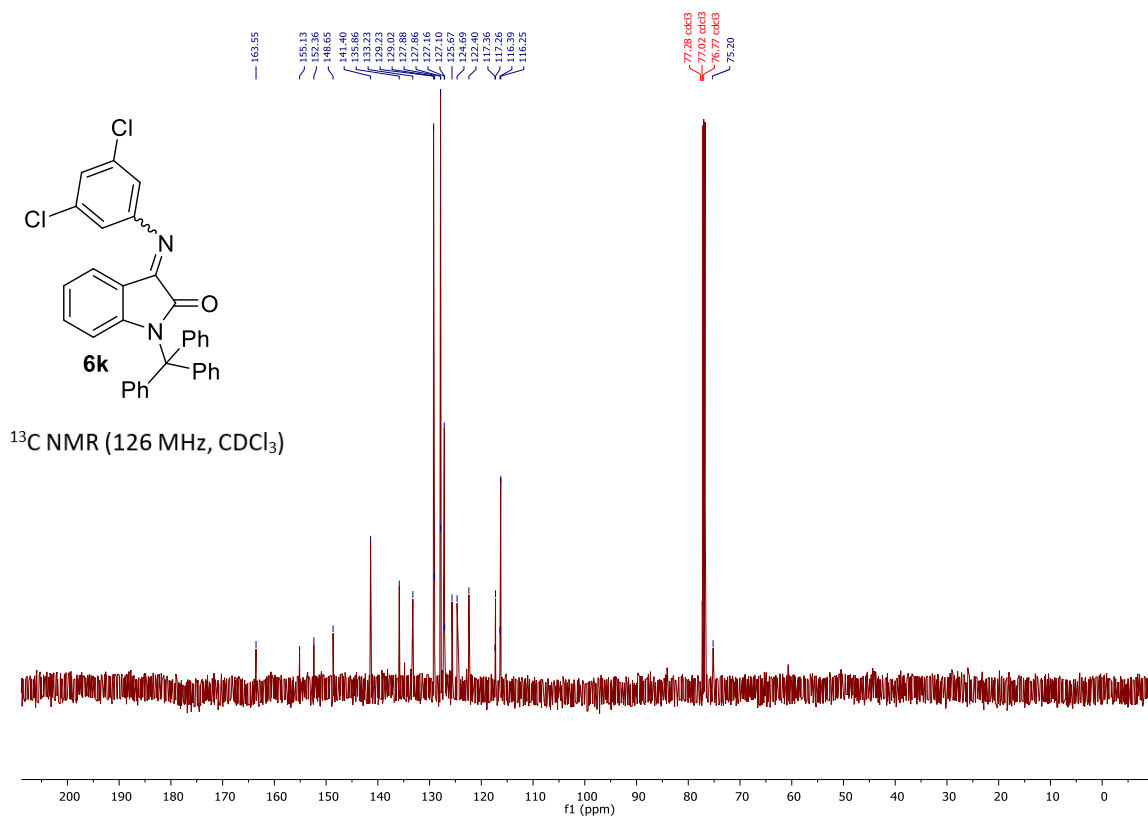

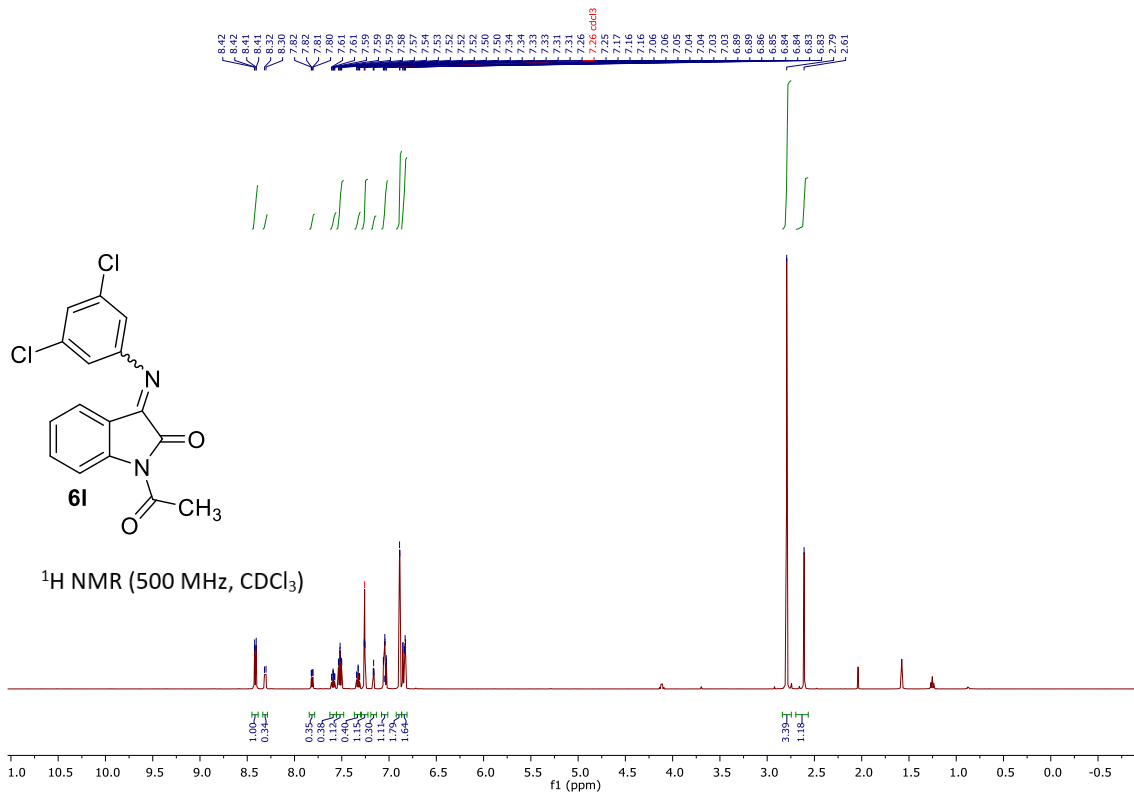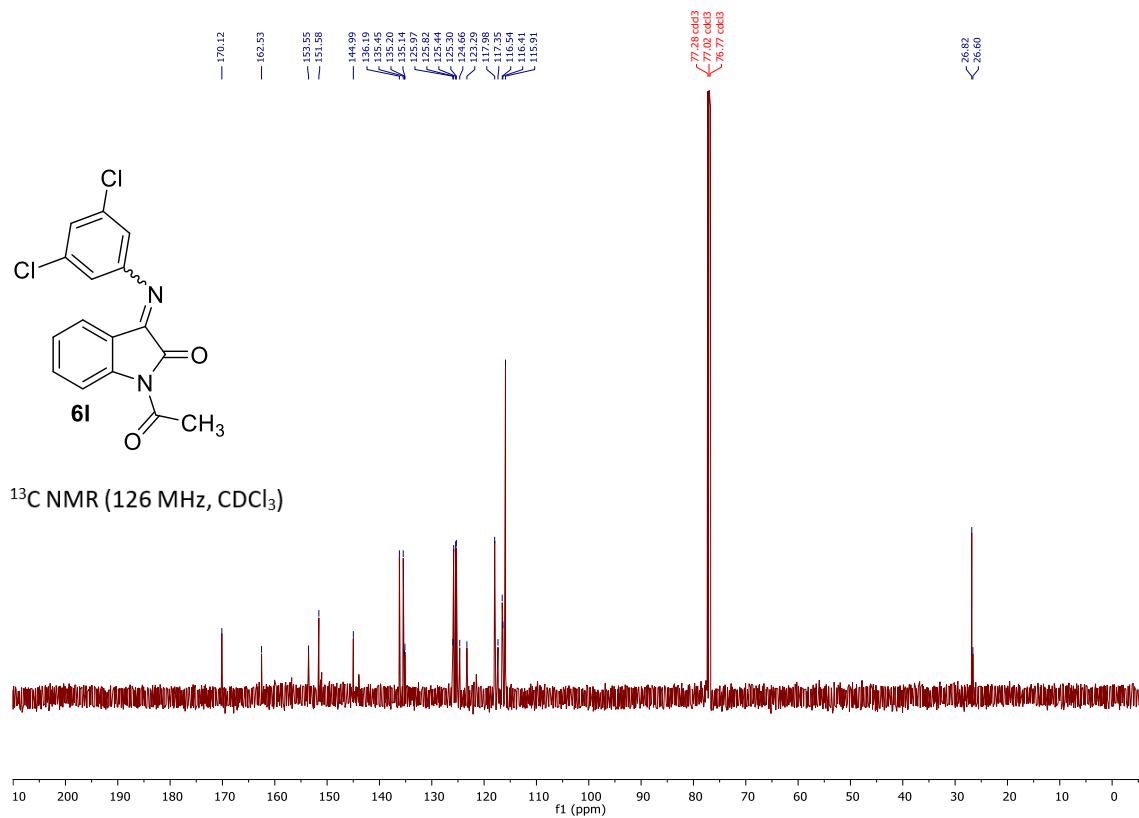

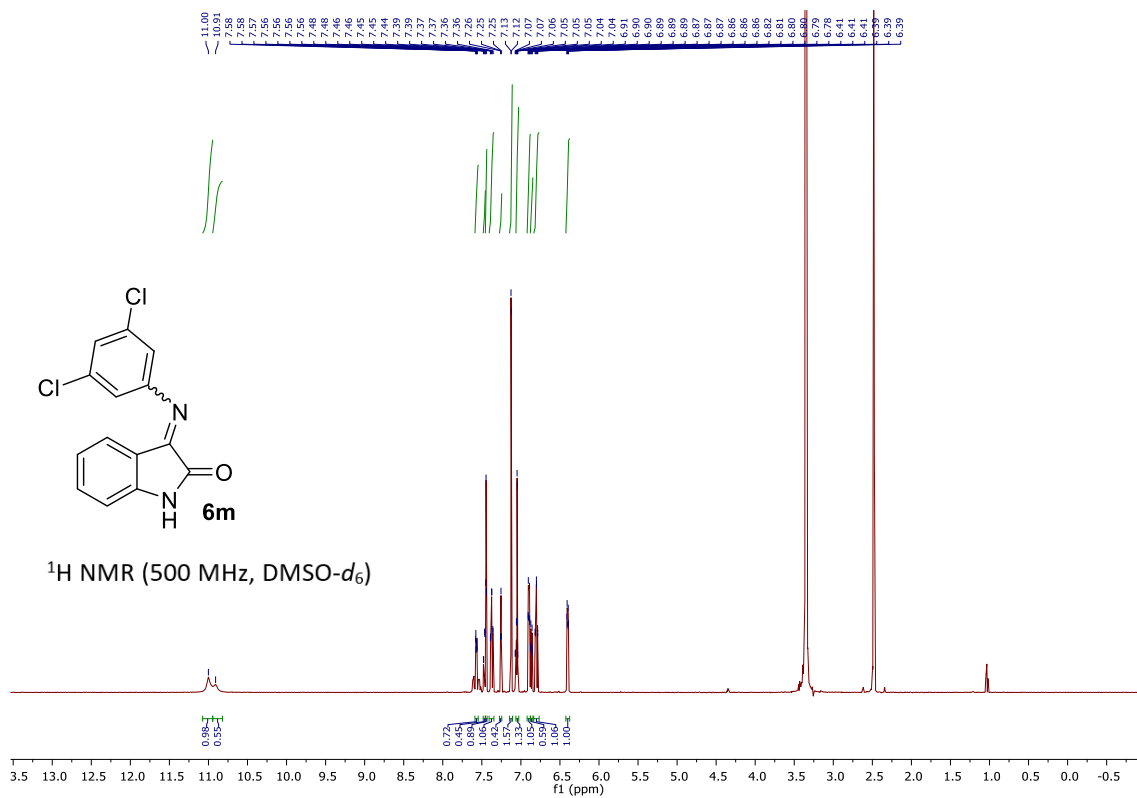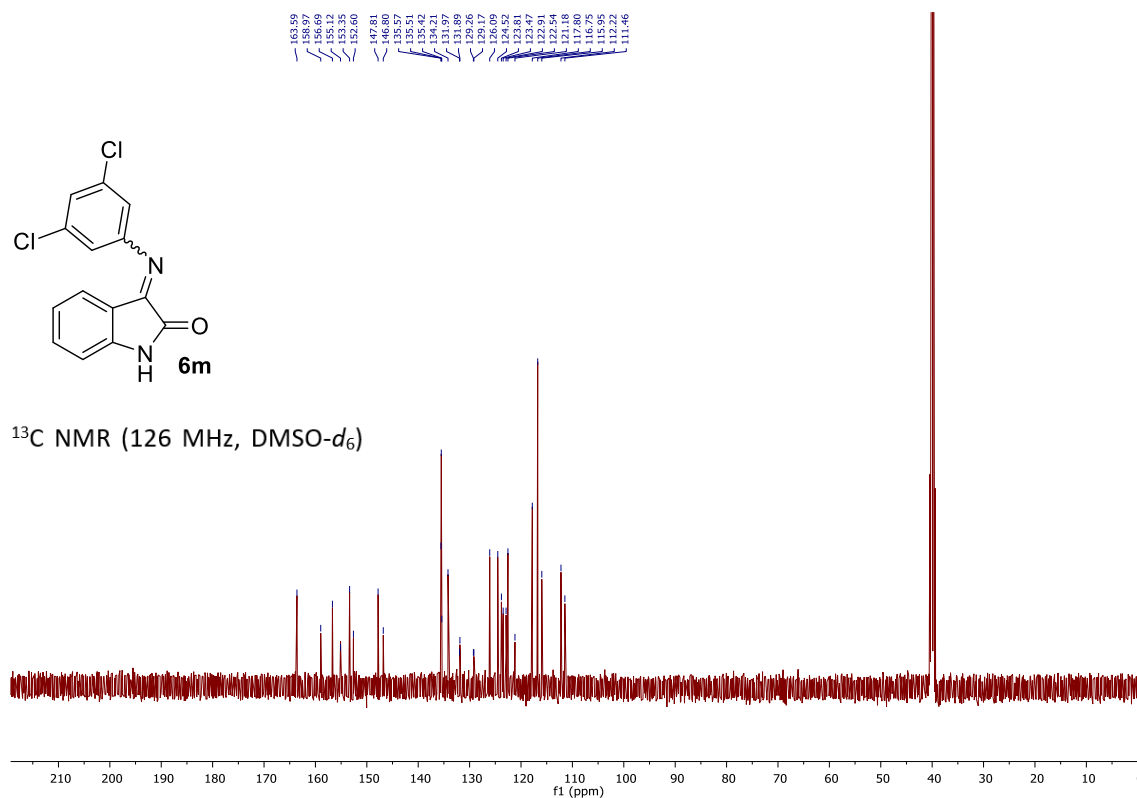

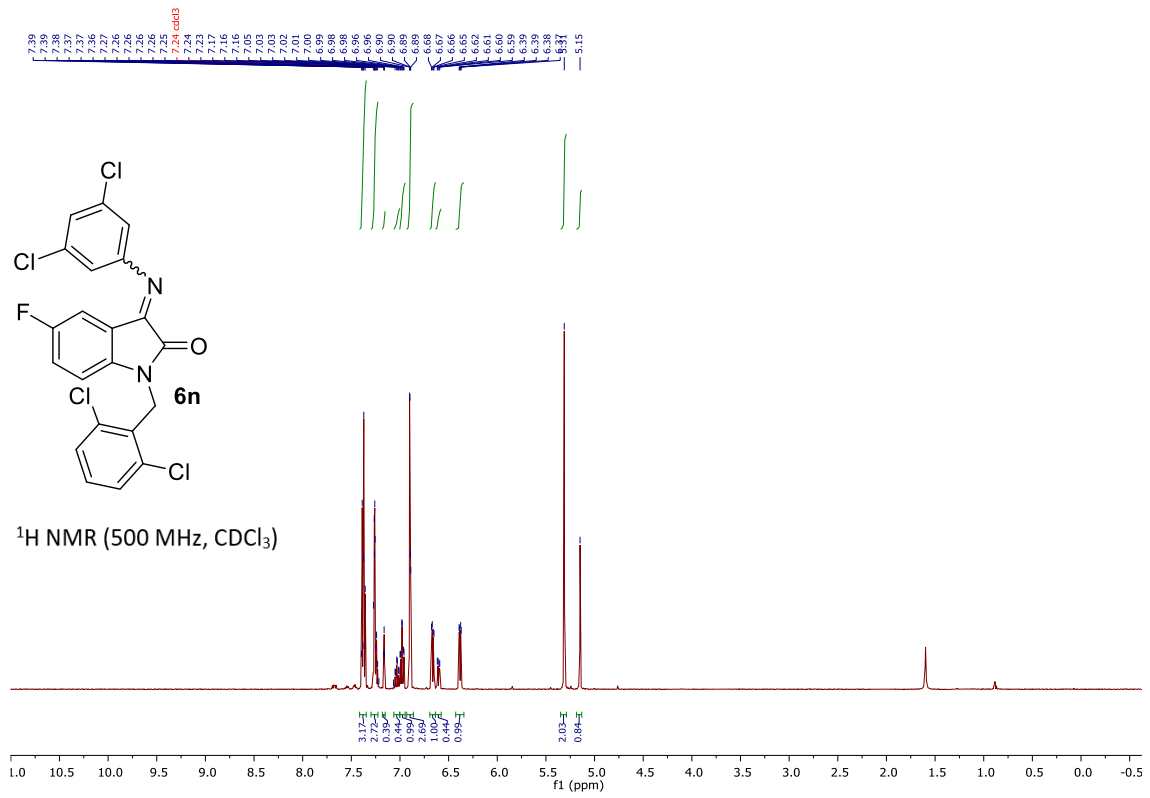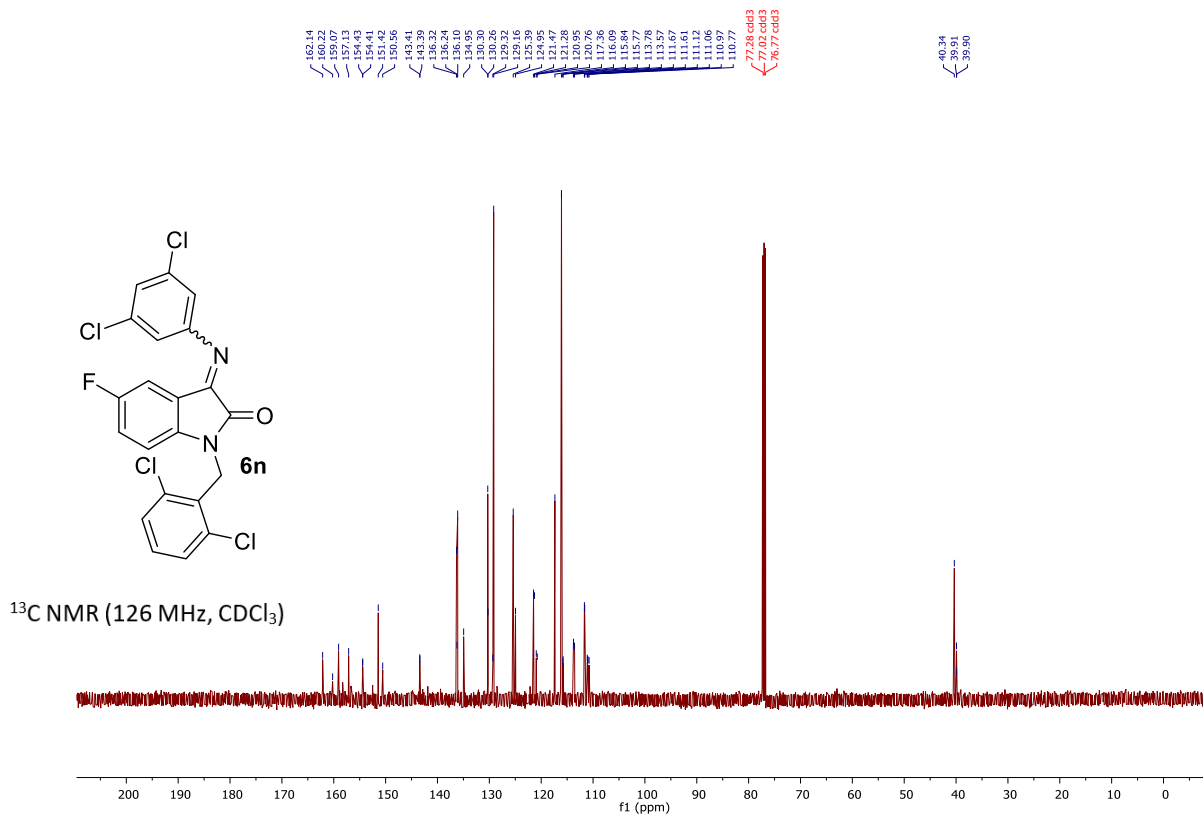

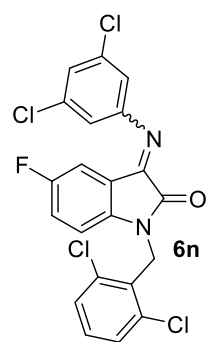

$^{19}\text{F}$  NMR (470 MHz,  $\text{CDCl}_3$ )

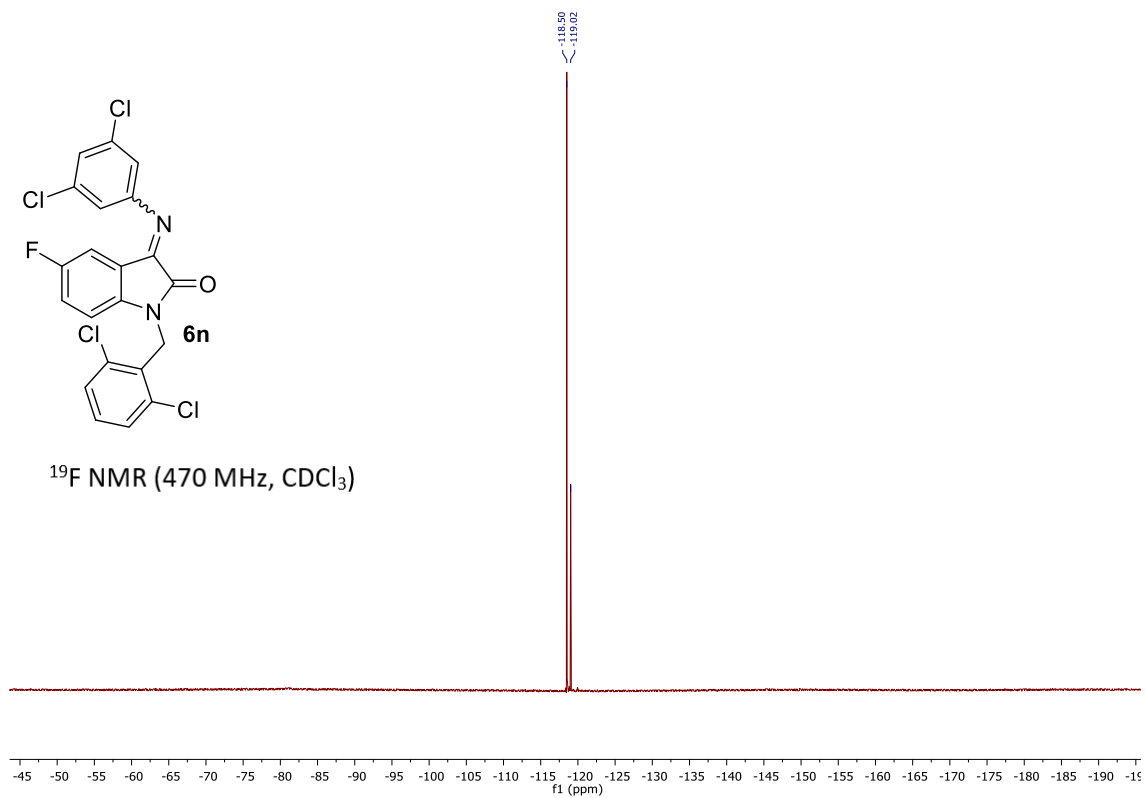

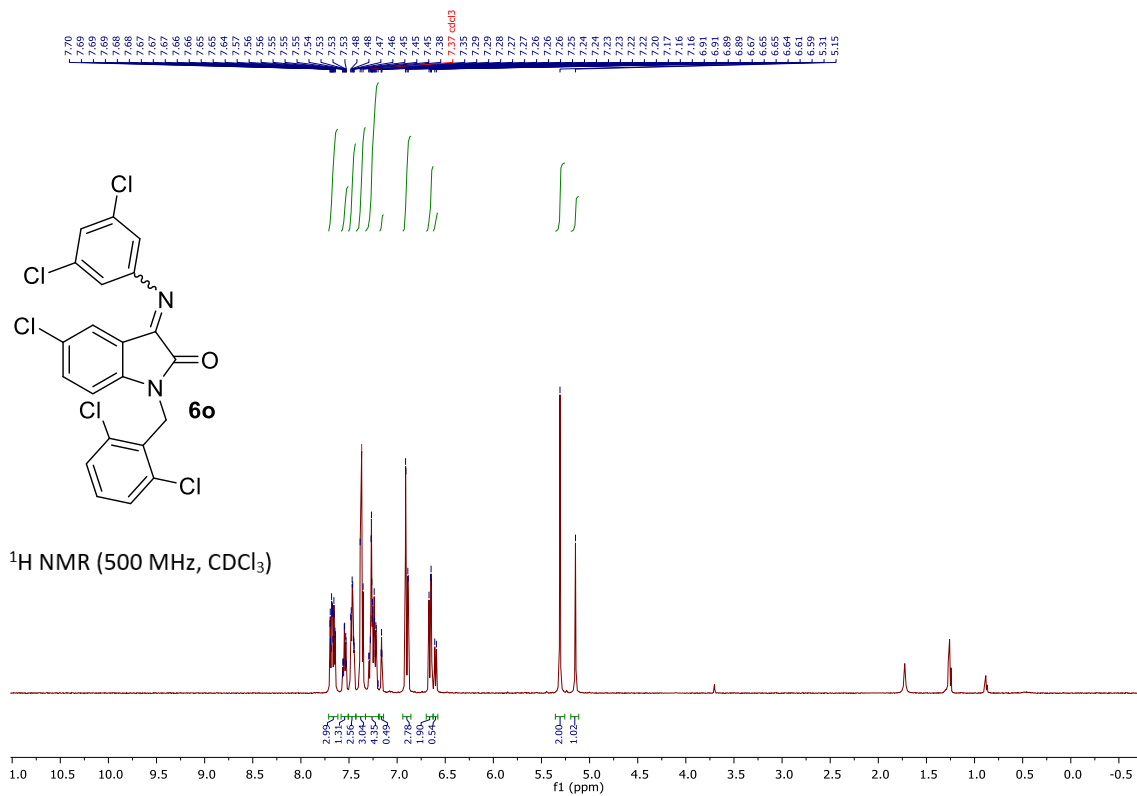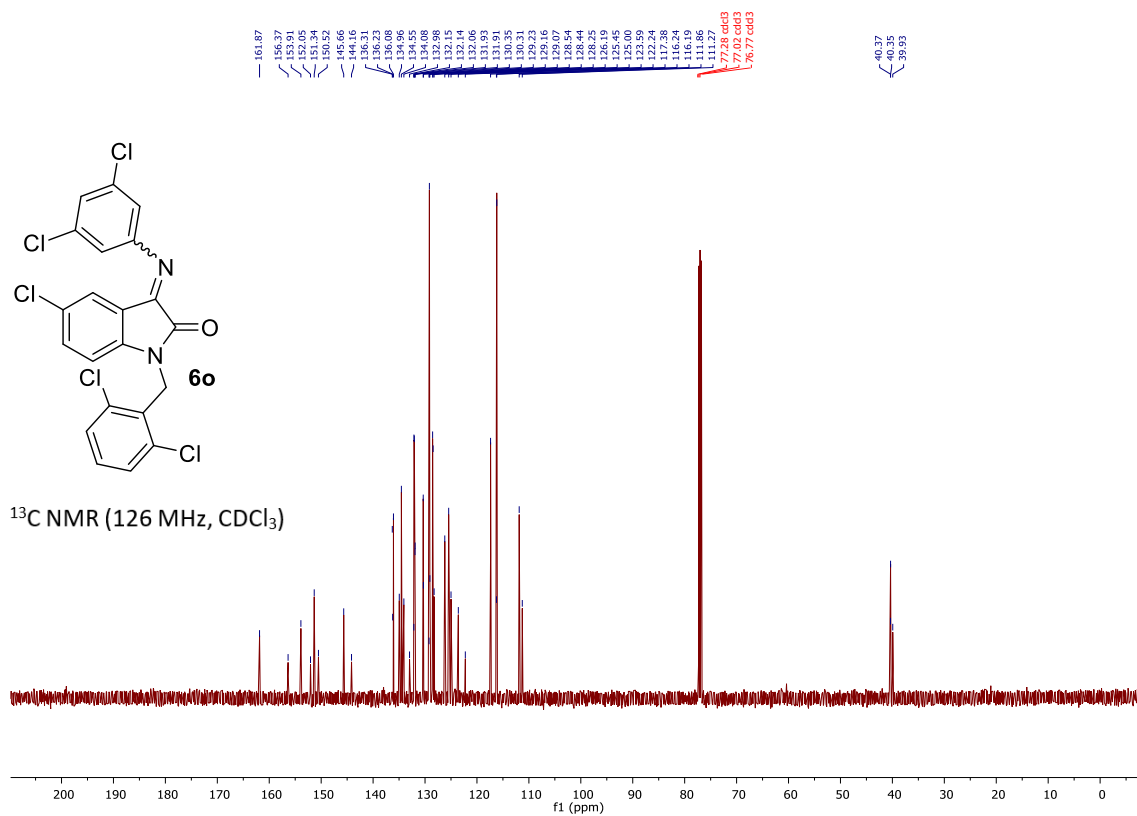

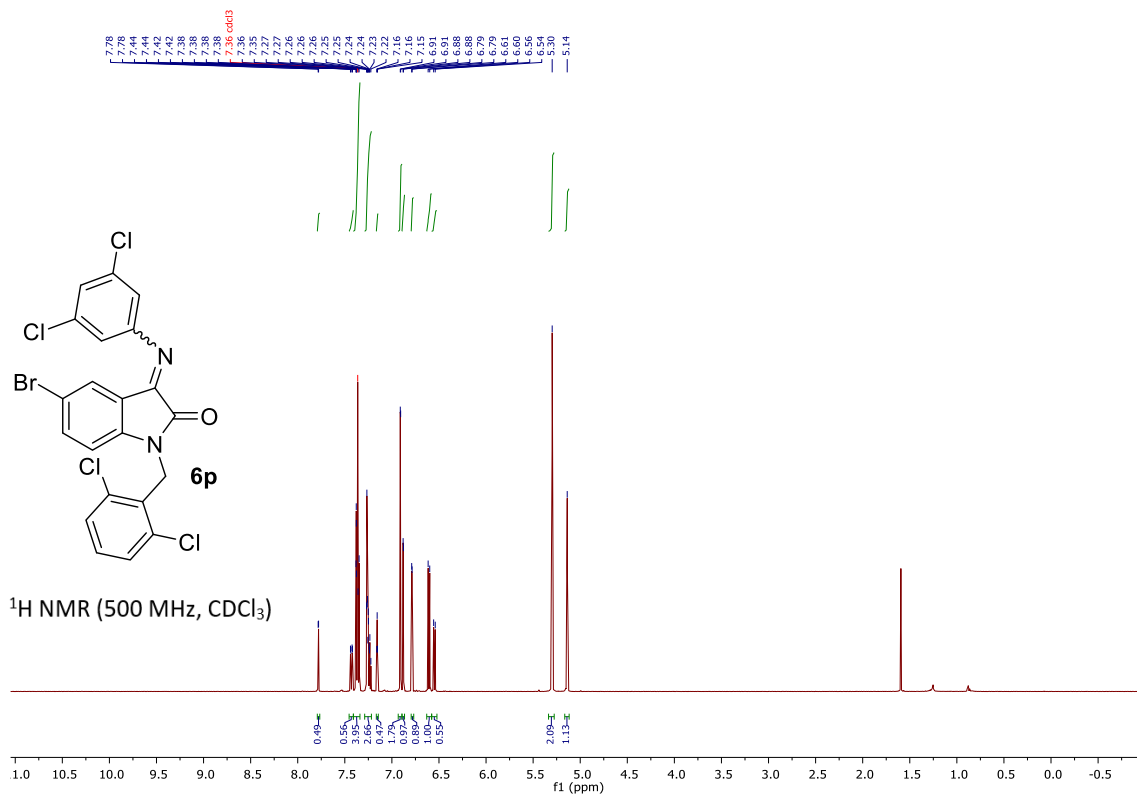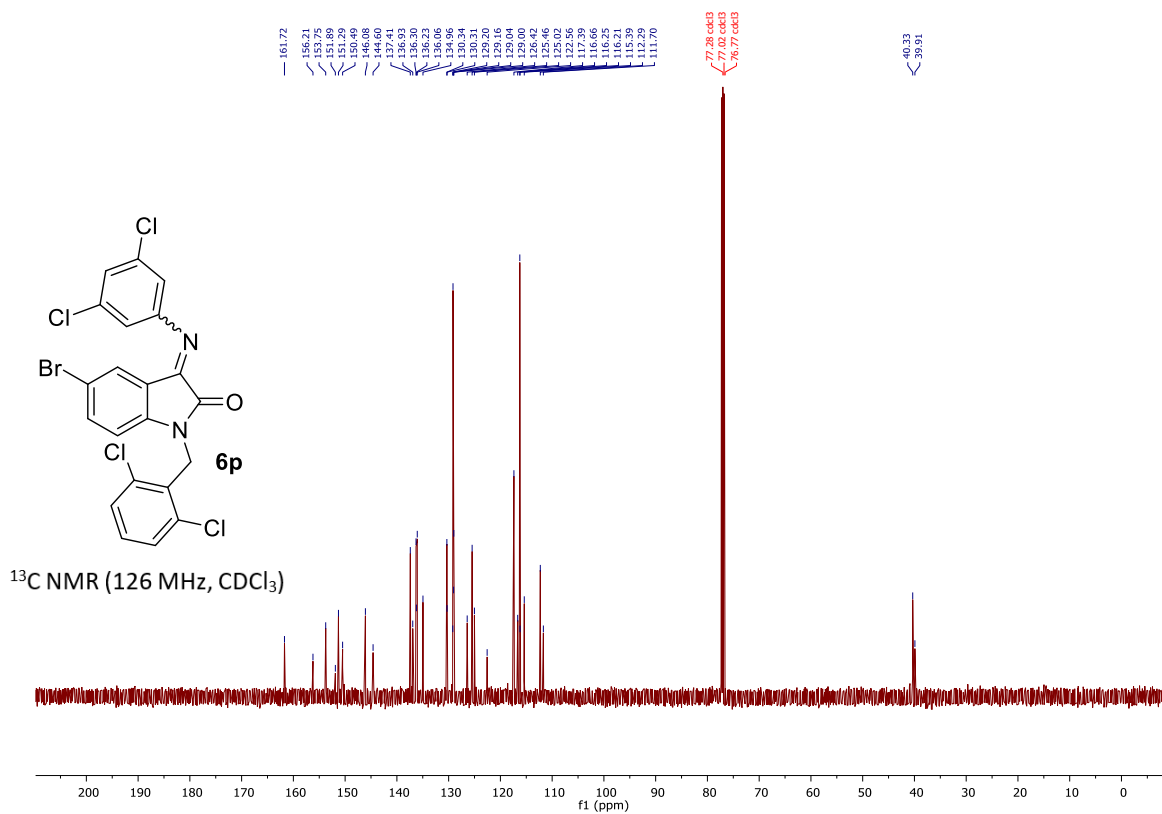



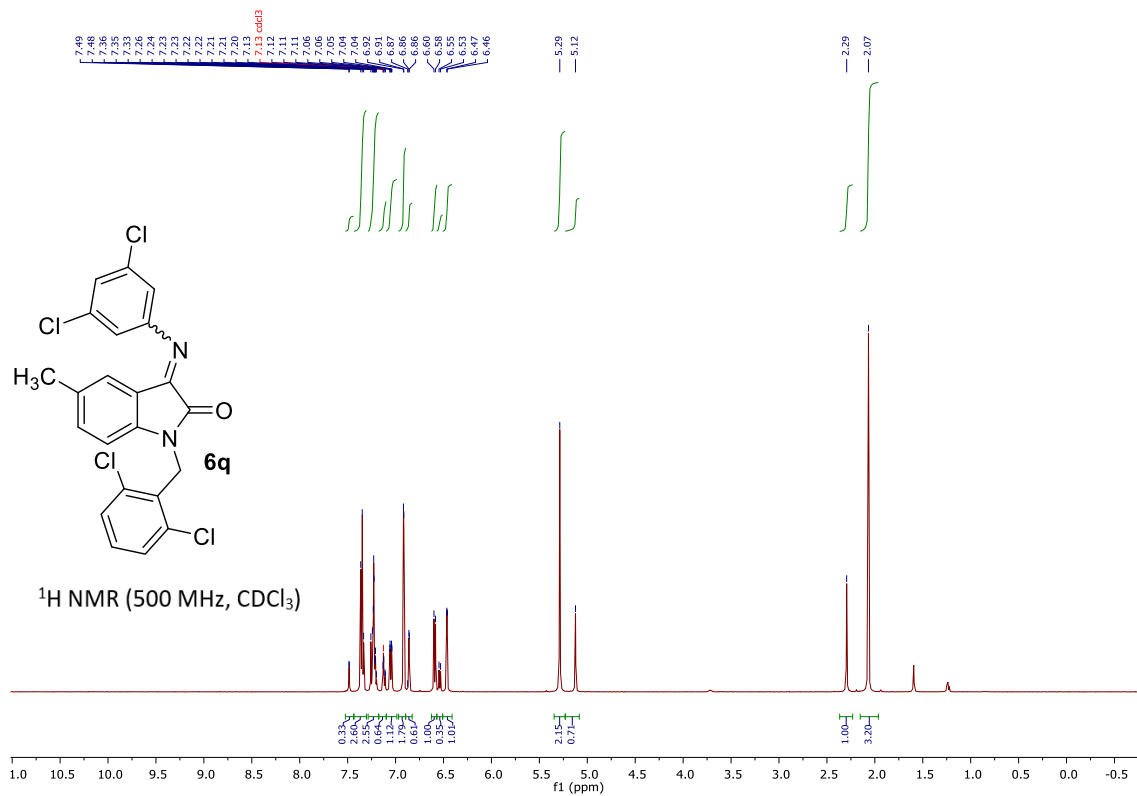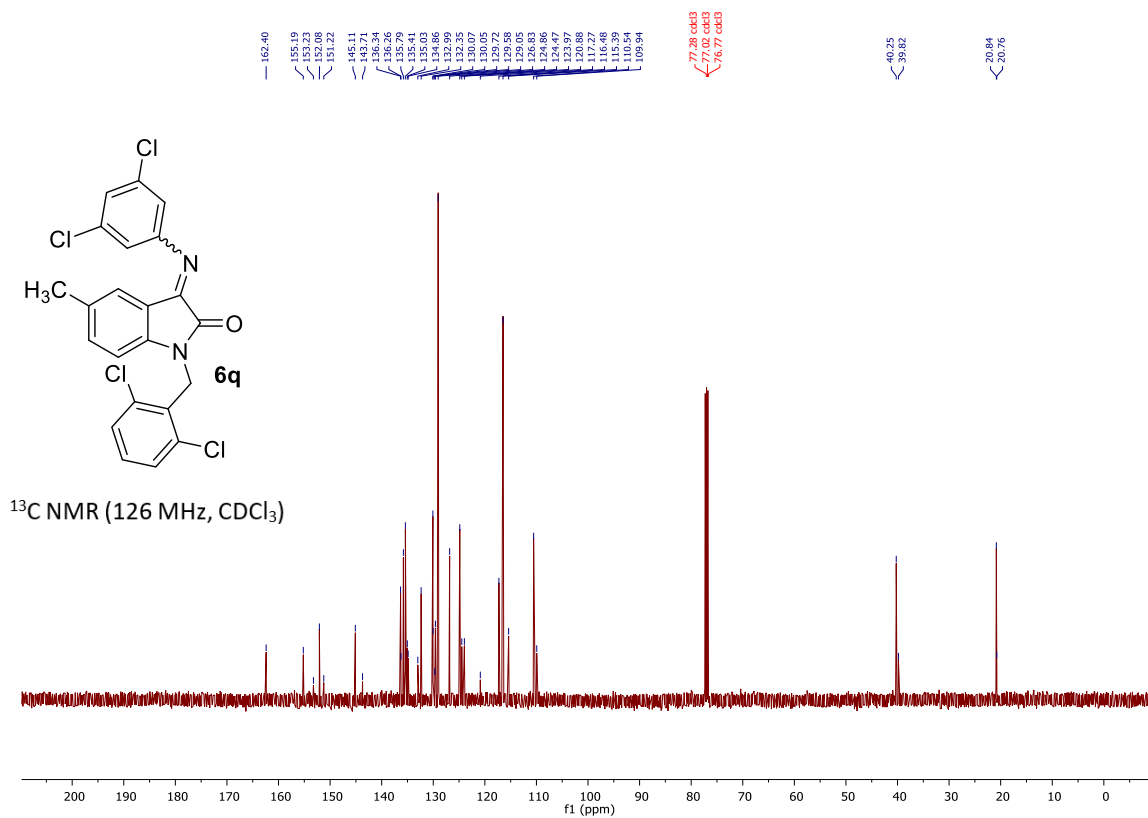

1r:

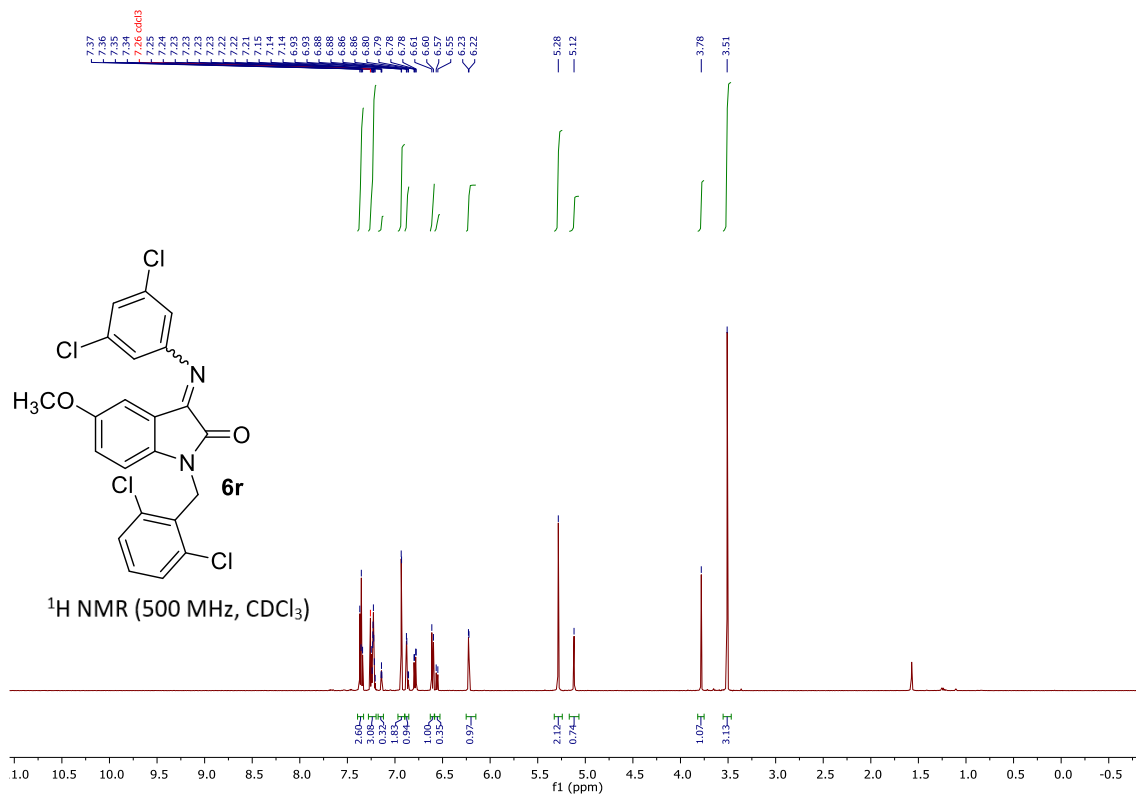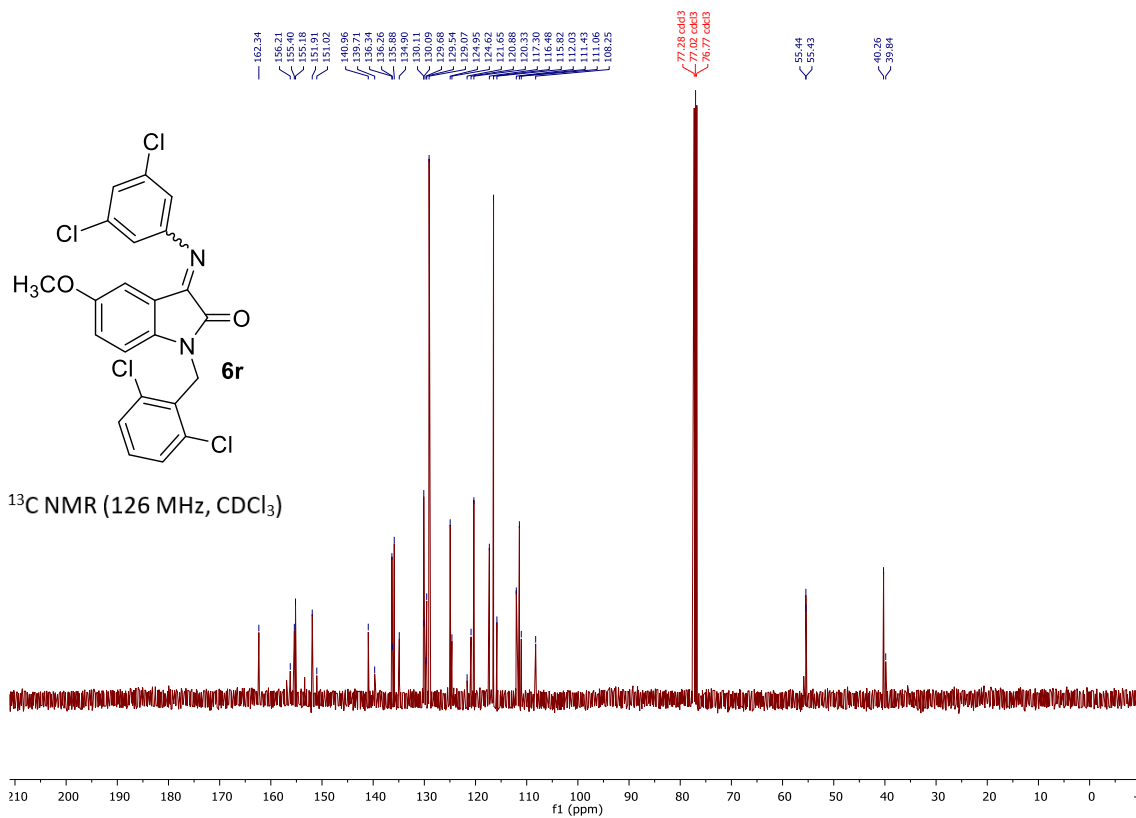

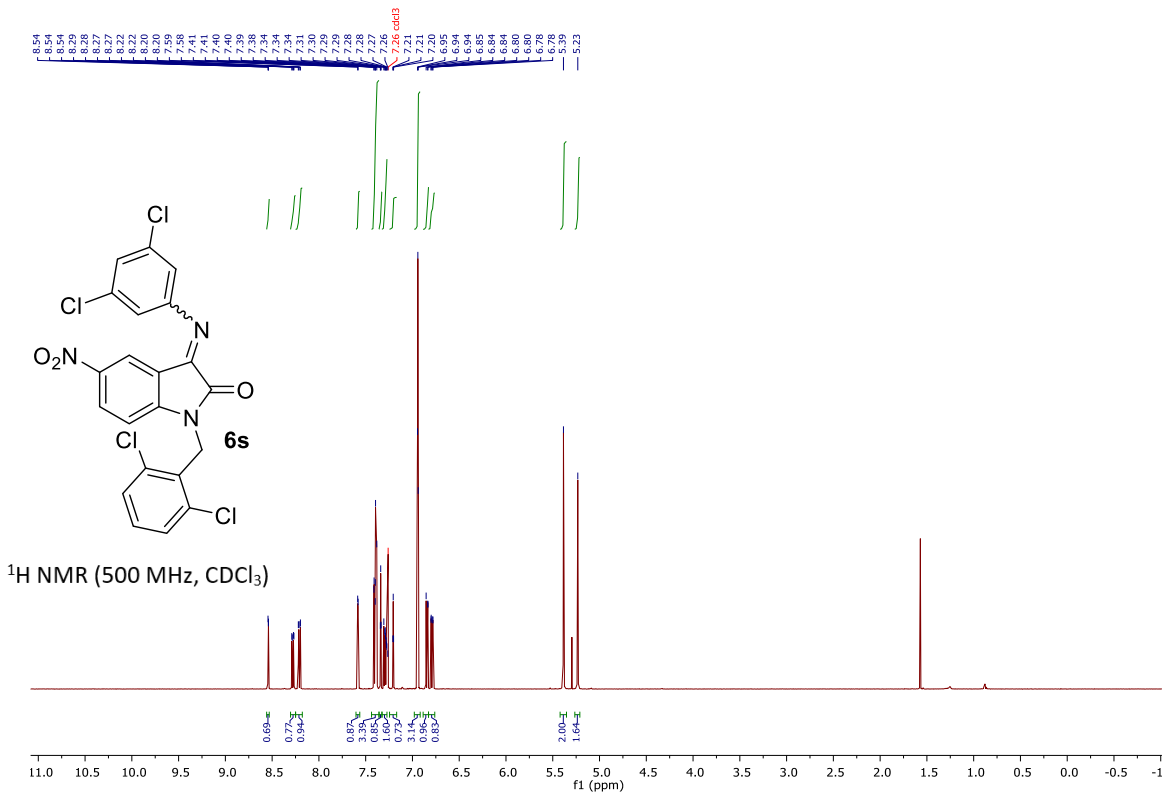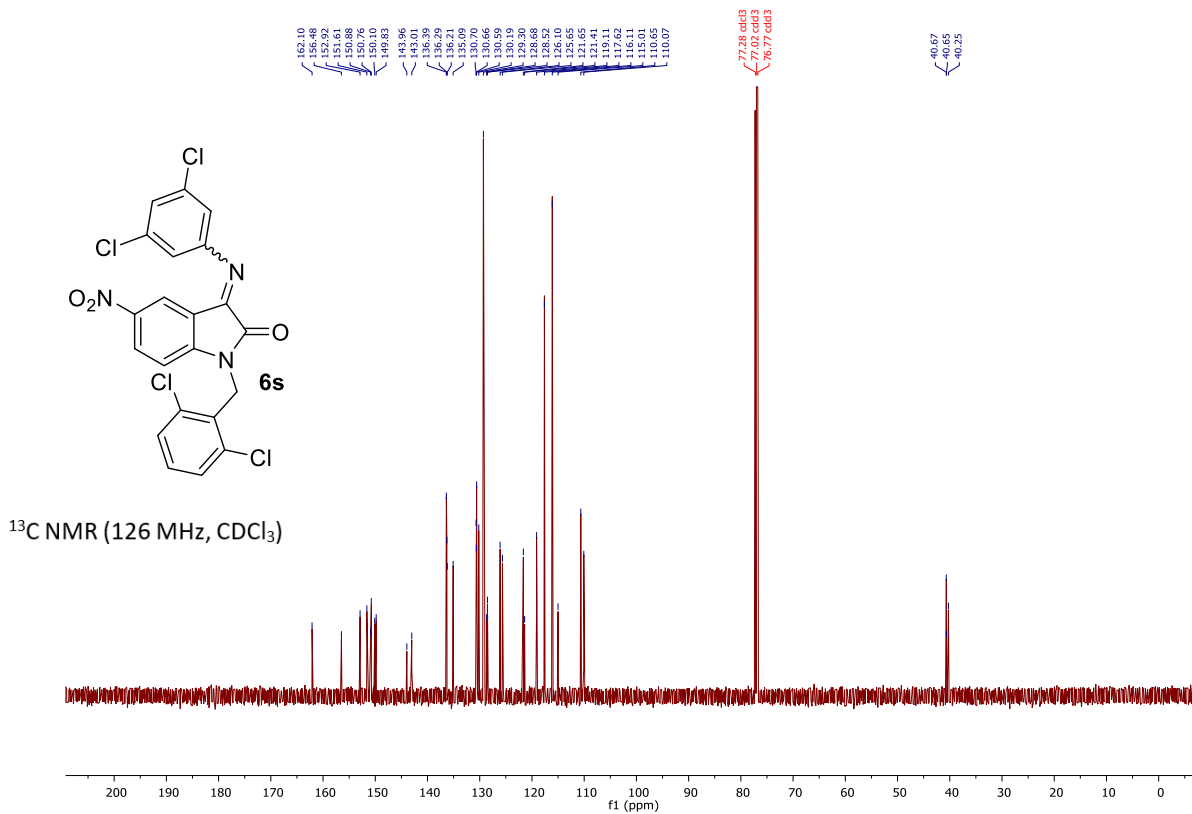



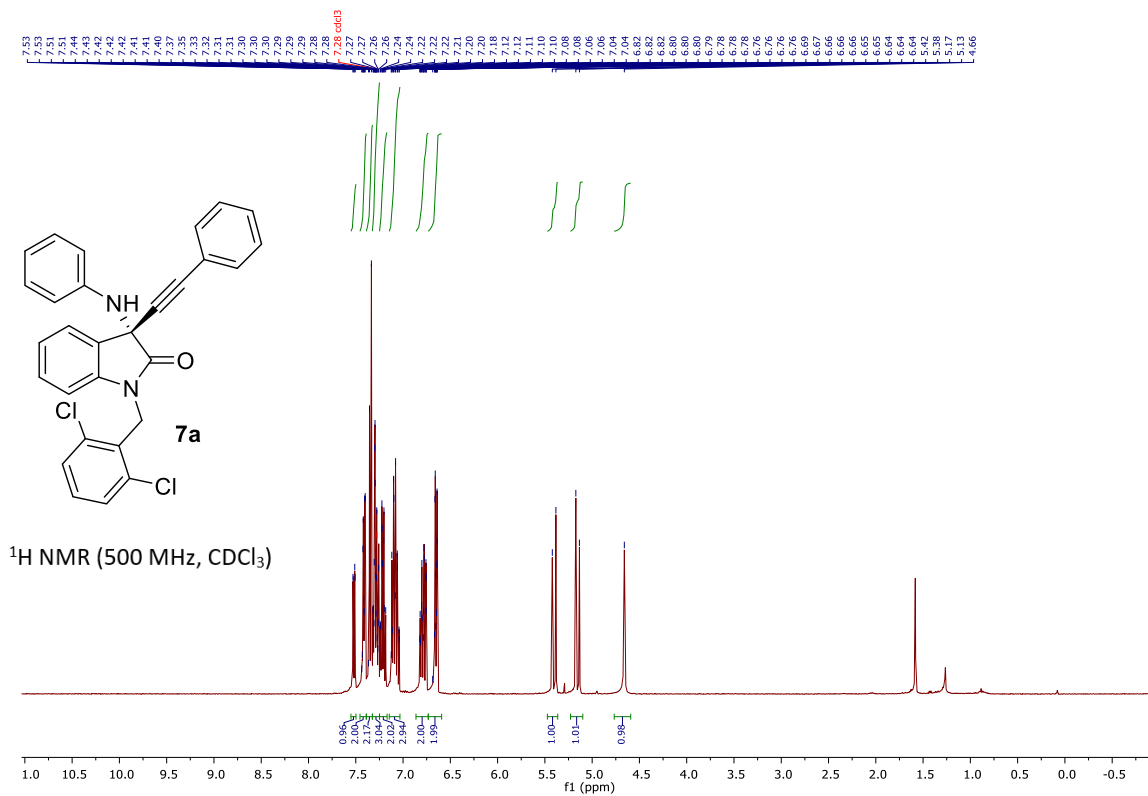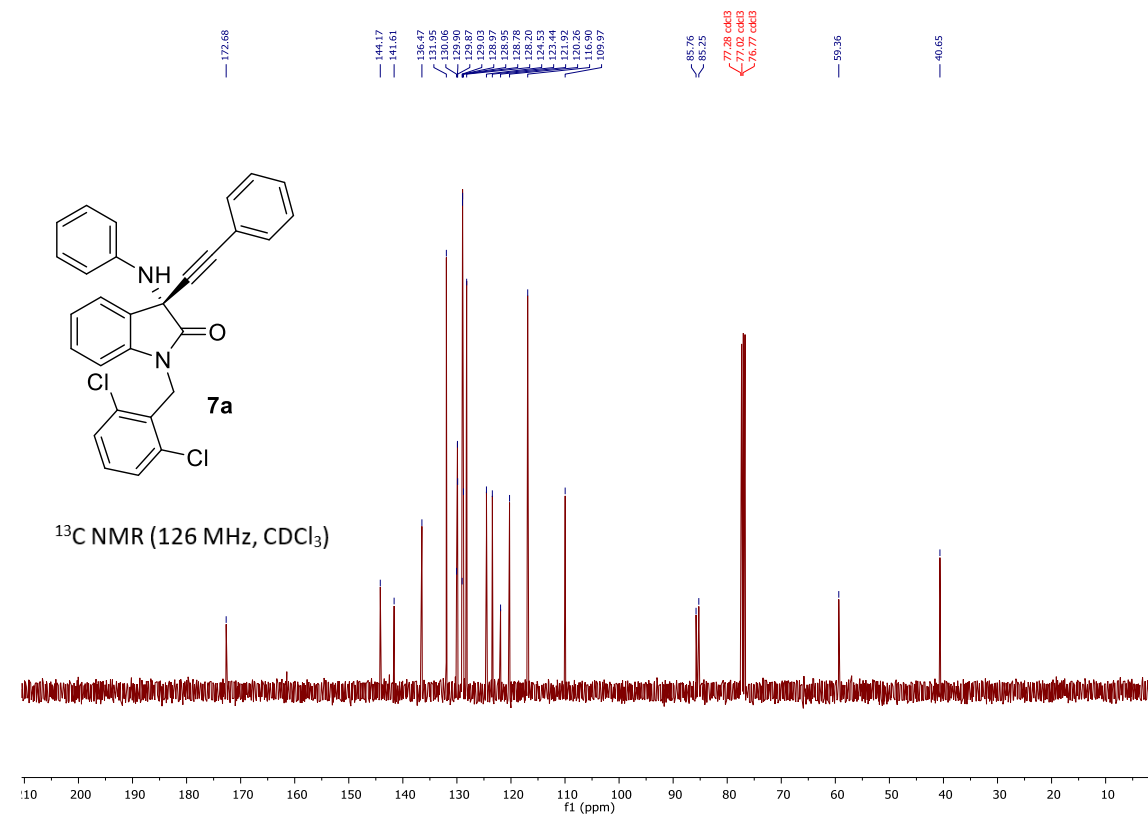



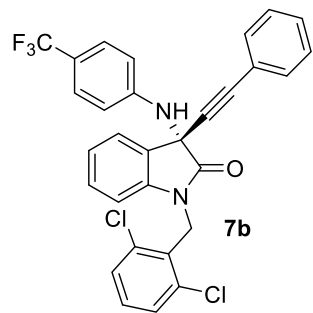

$^{19}\text{F}$  NMR (470 MHz,  $\text{CDCl}_3$ )

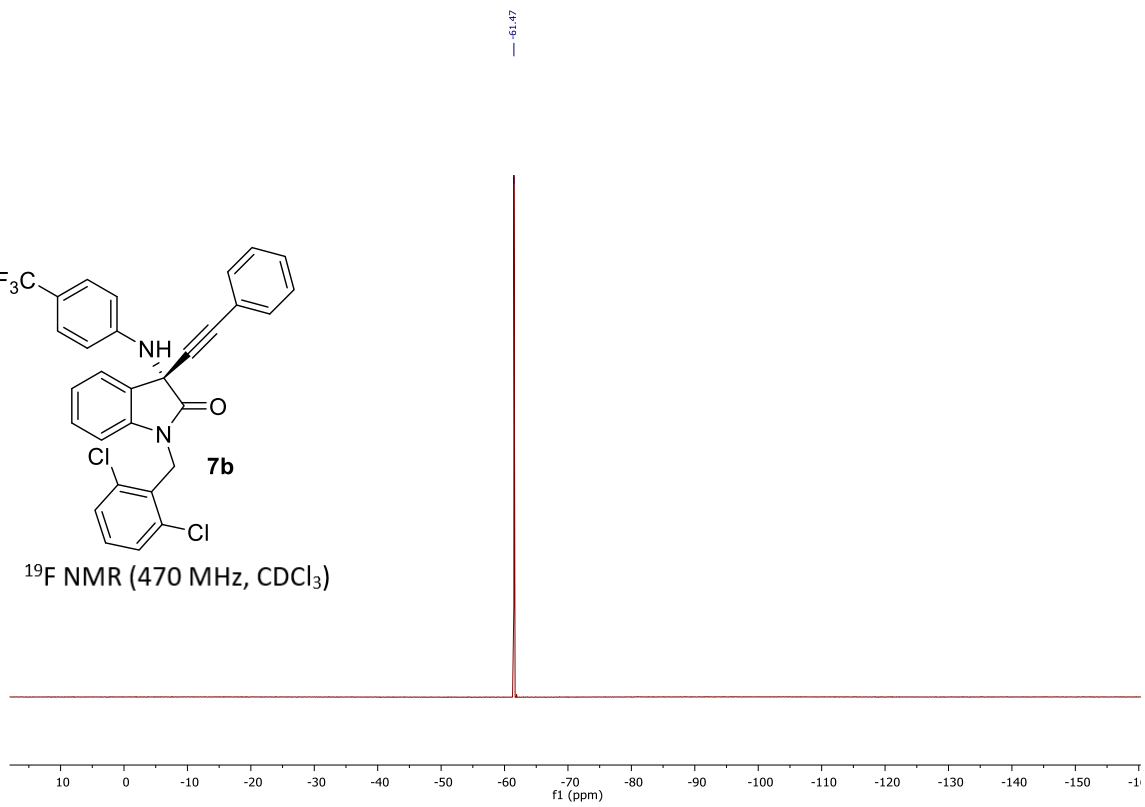

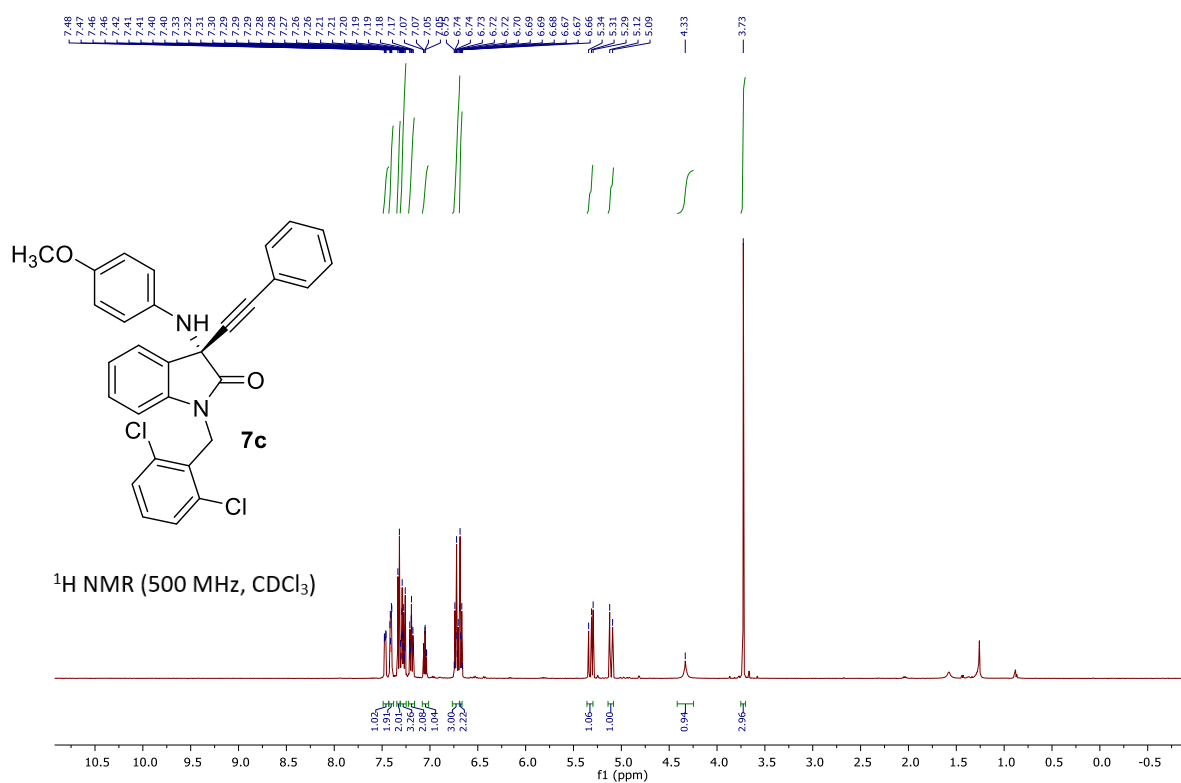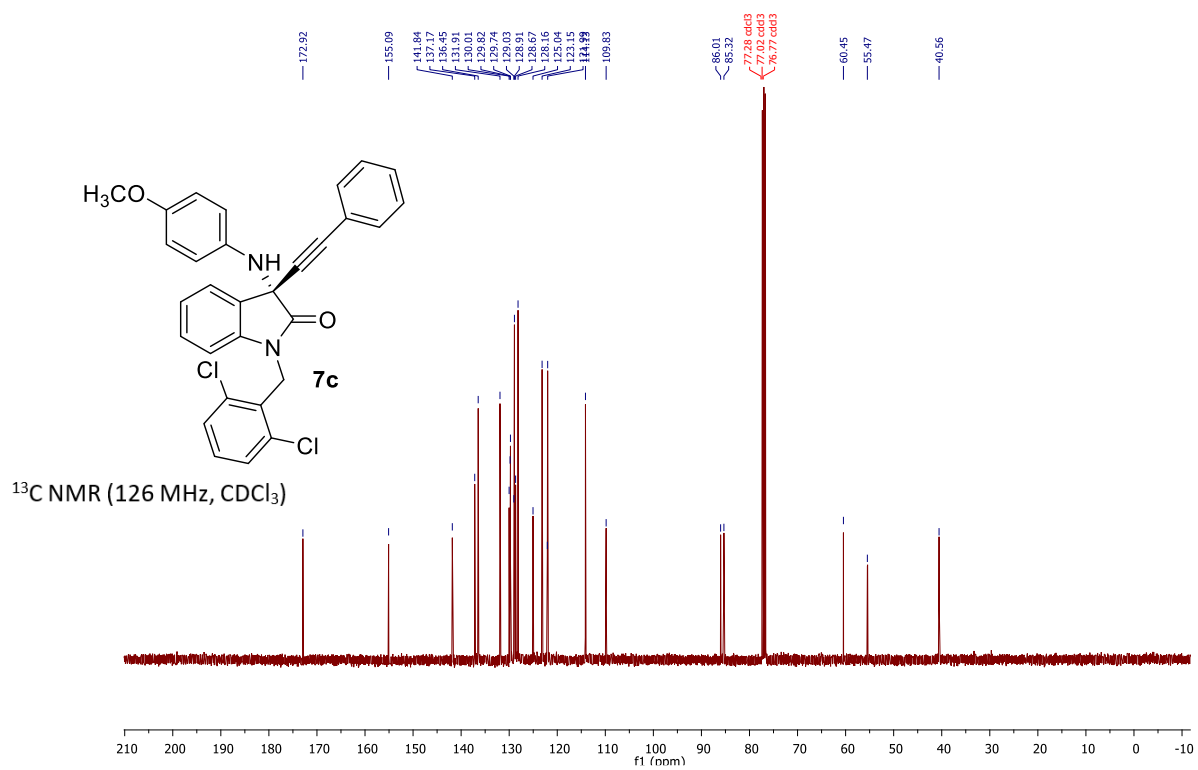



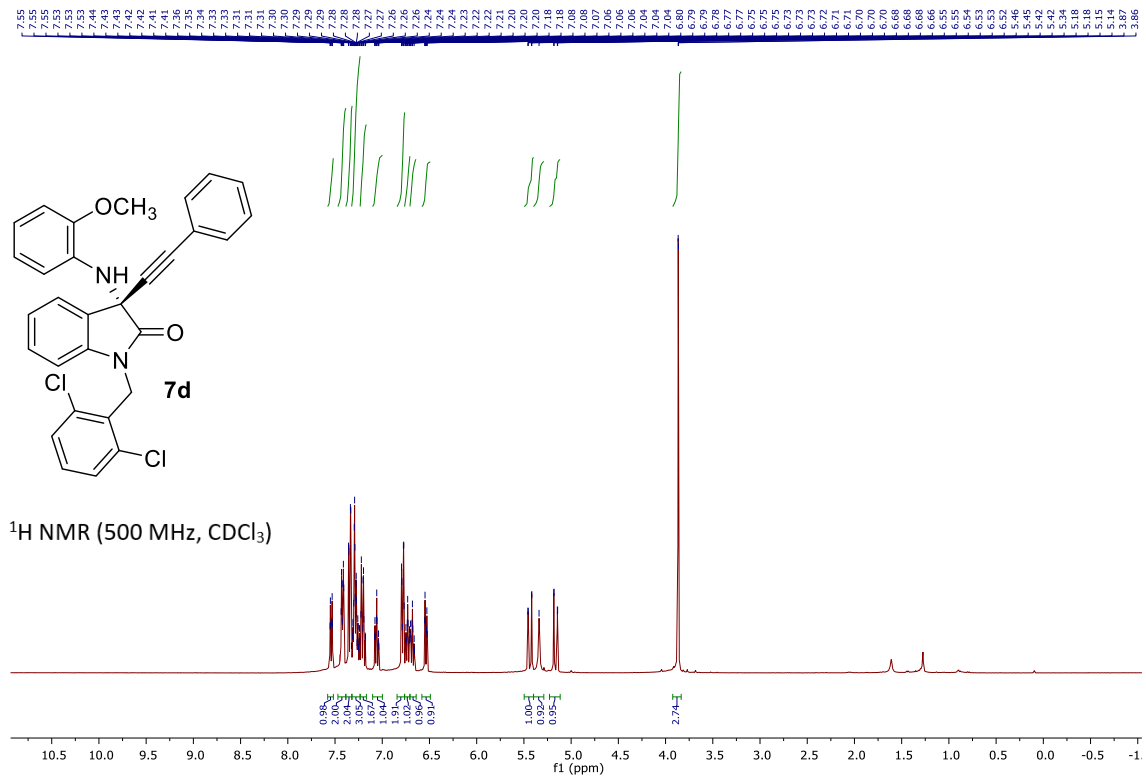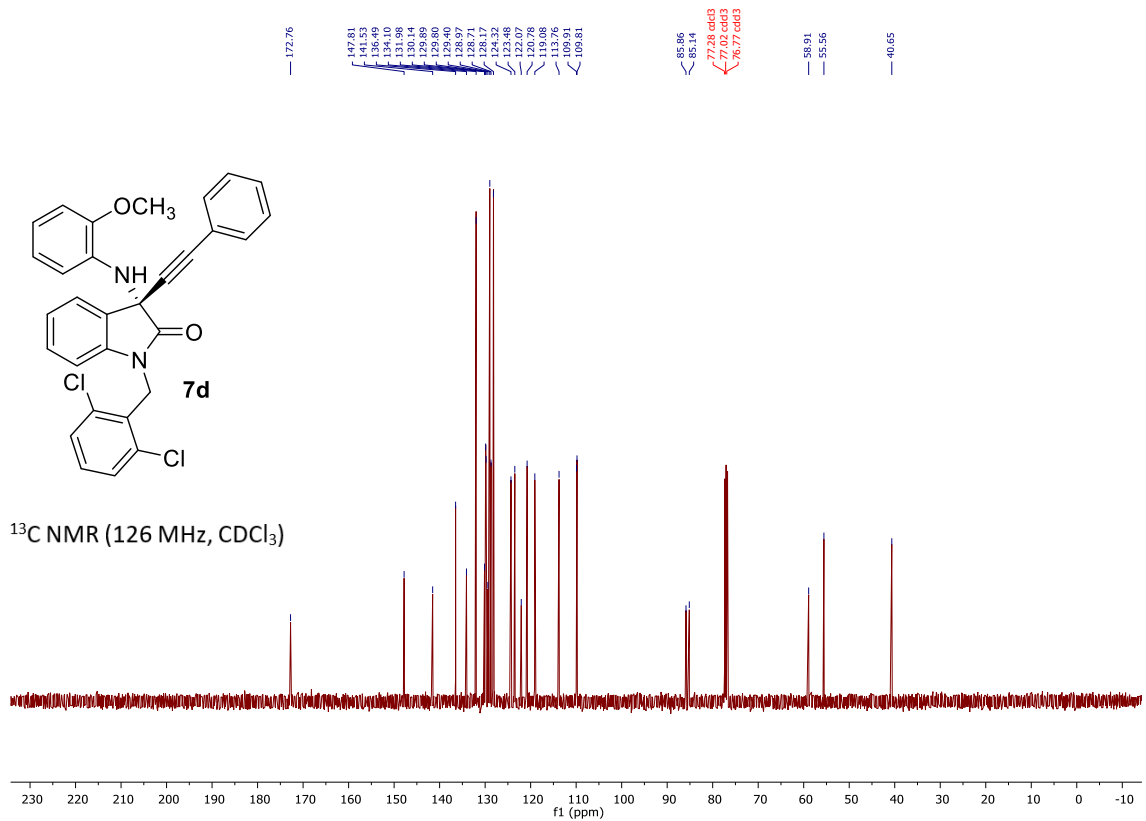

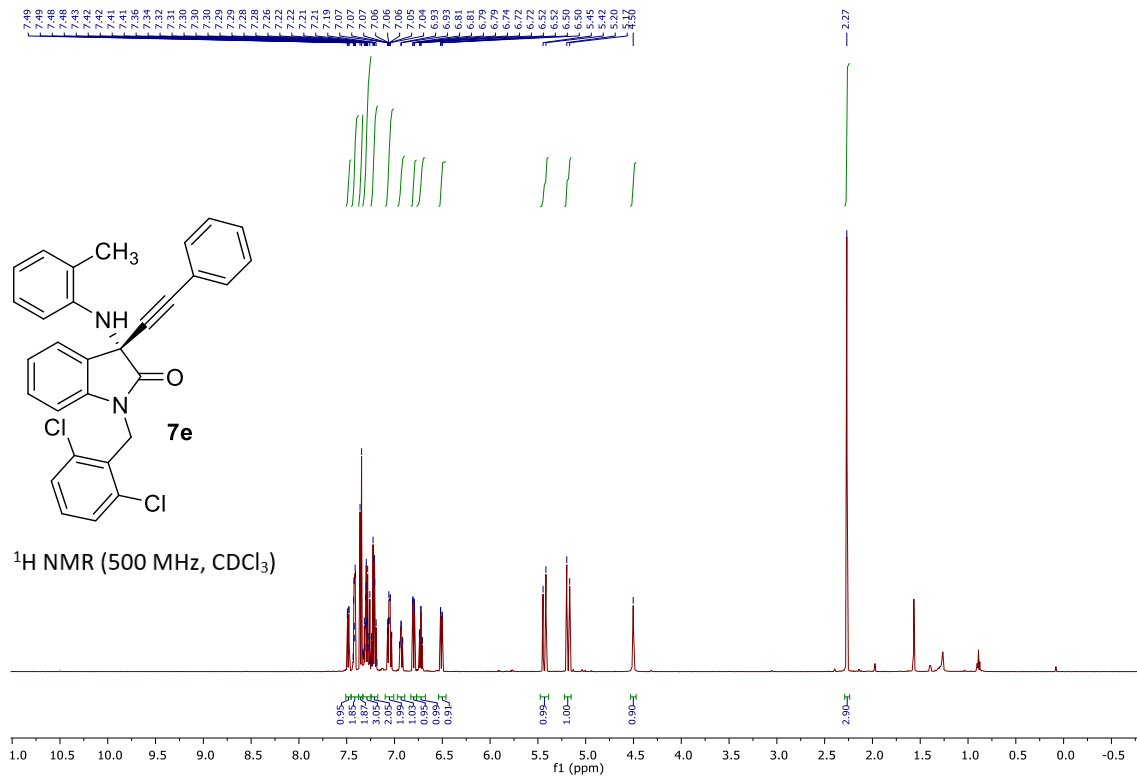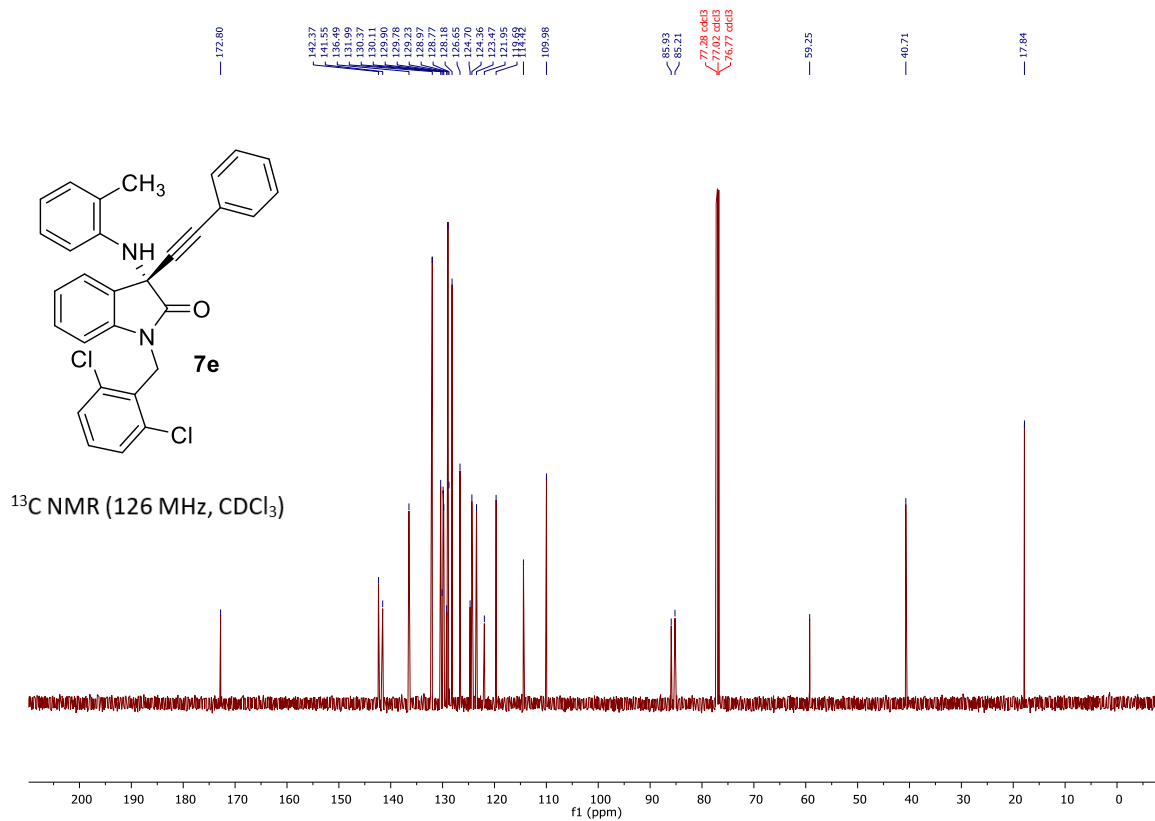

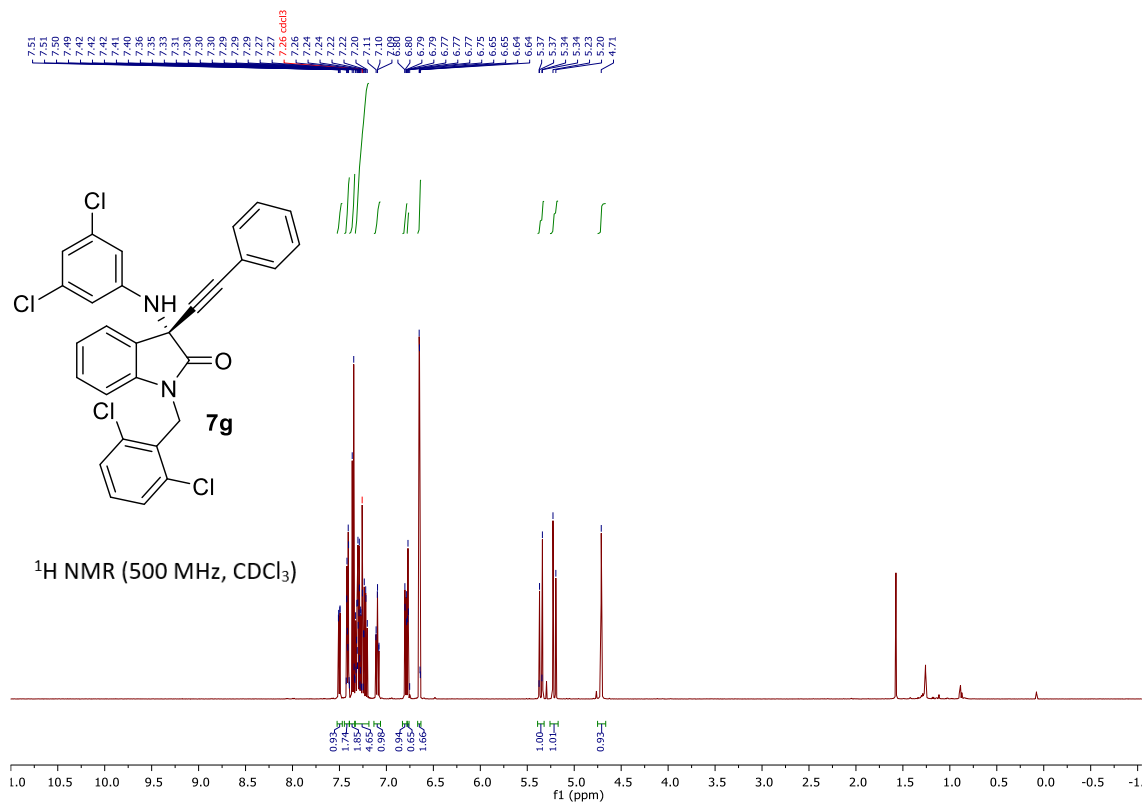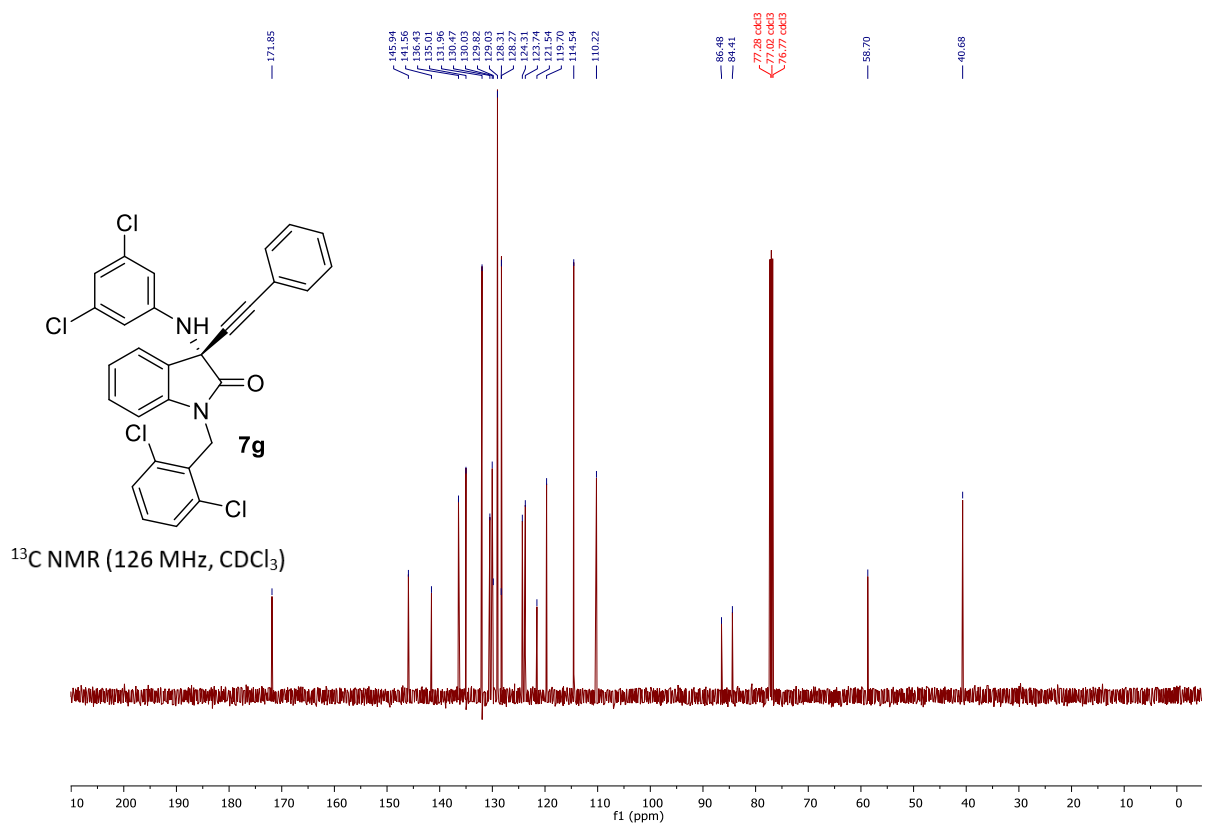

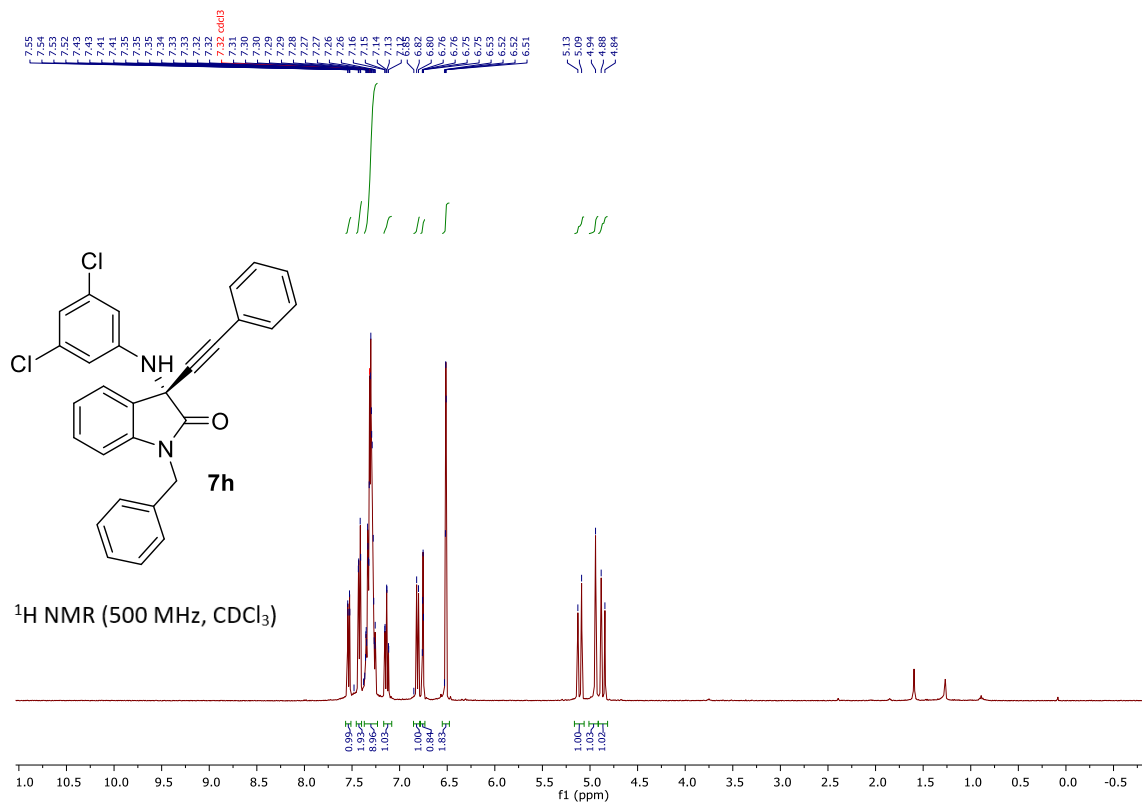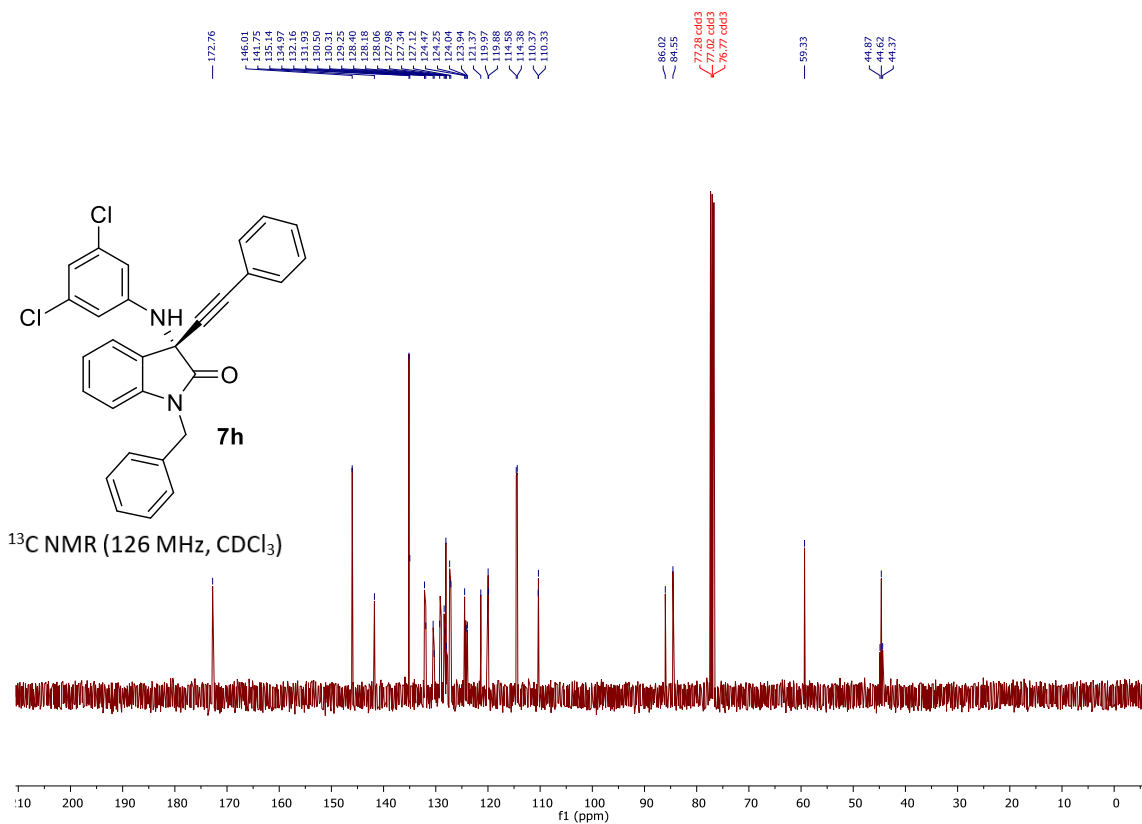

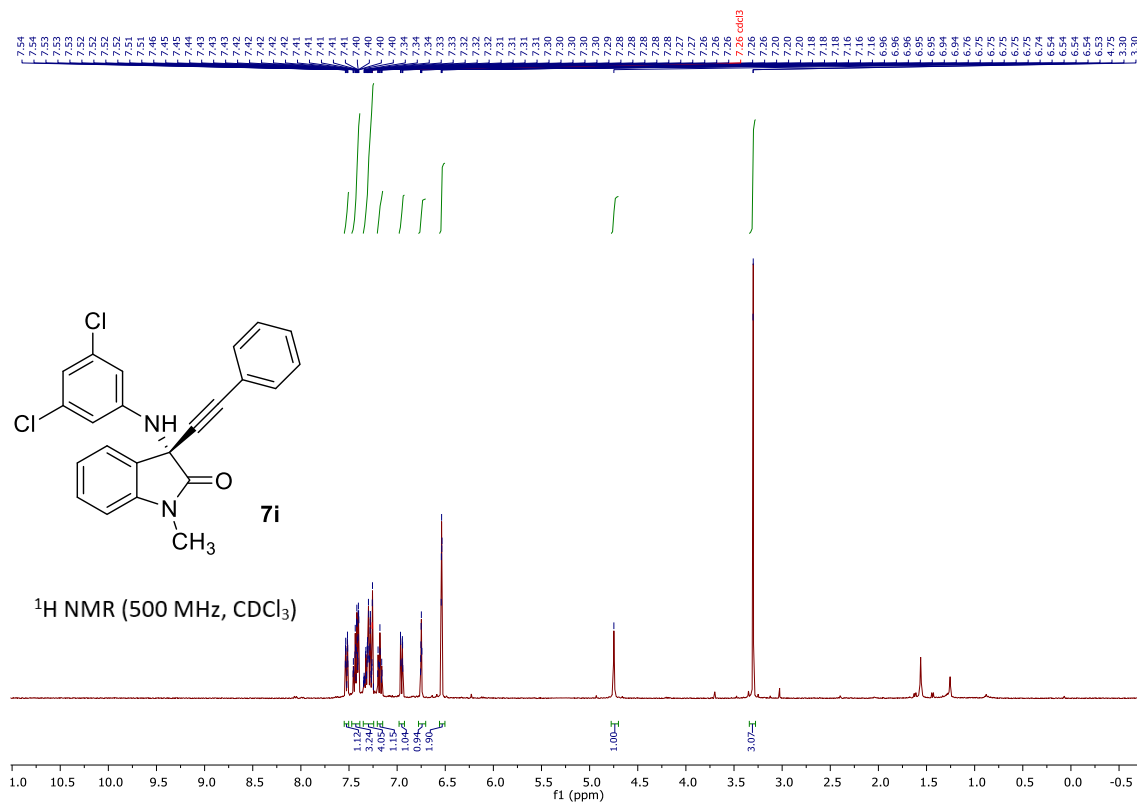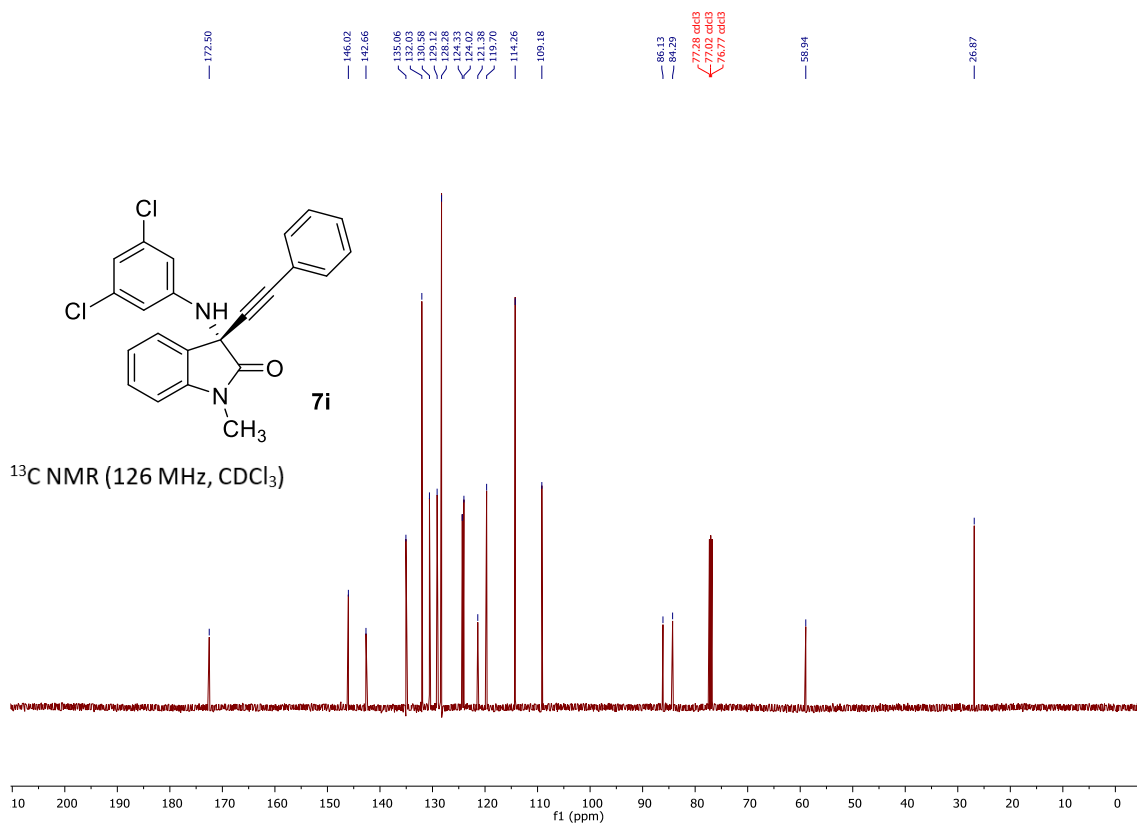

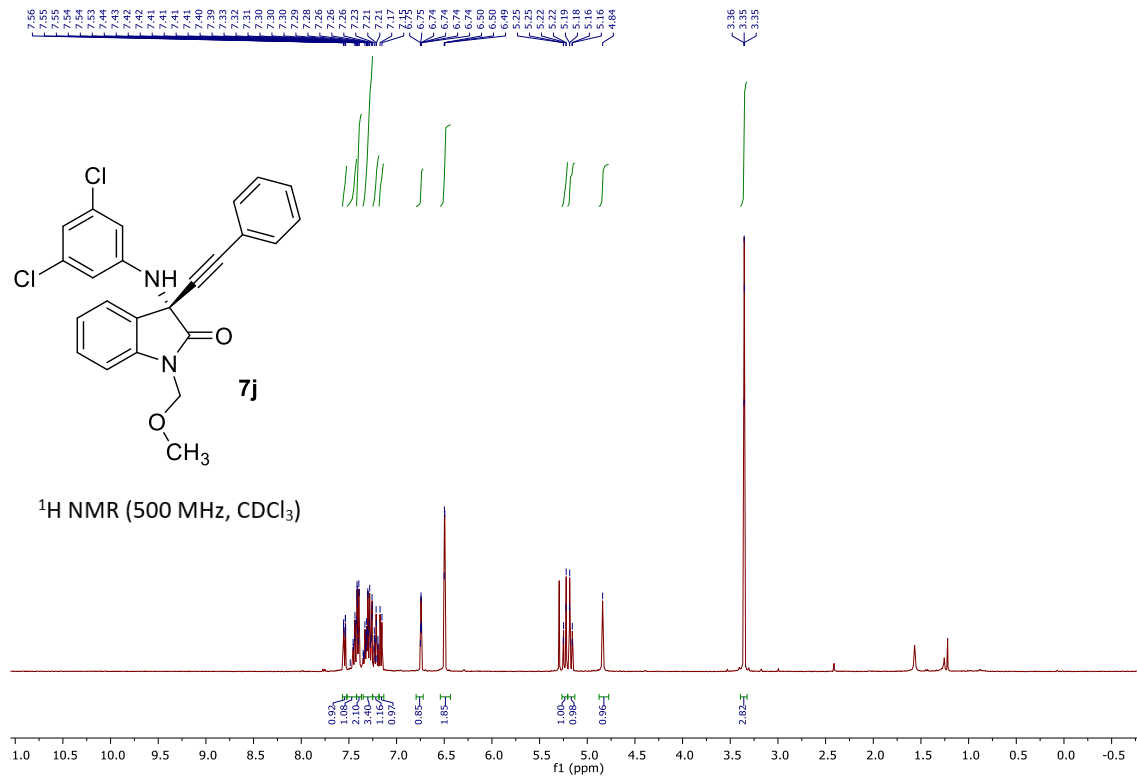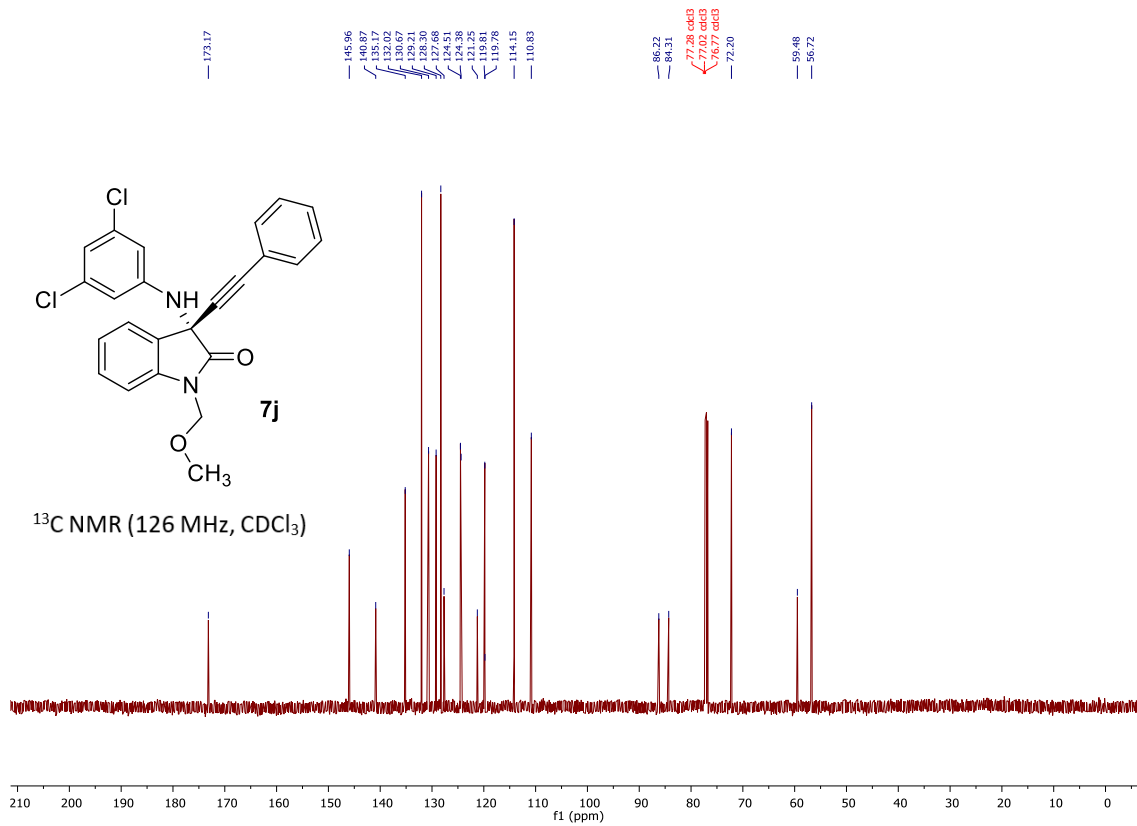

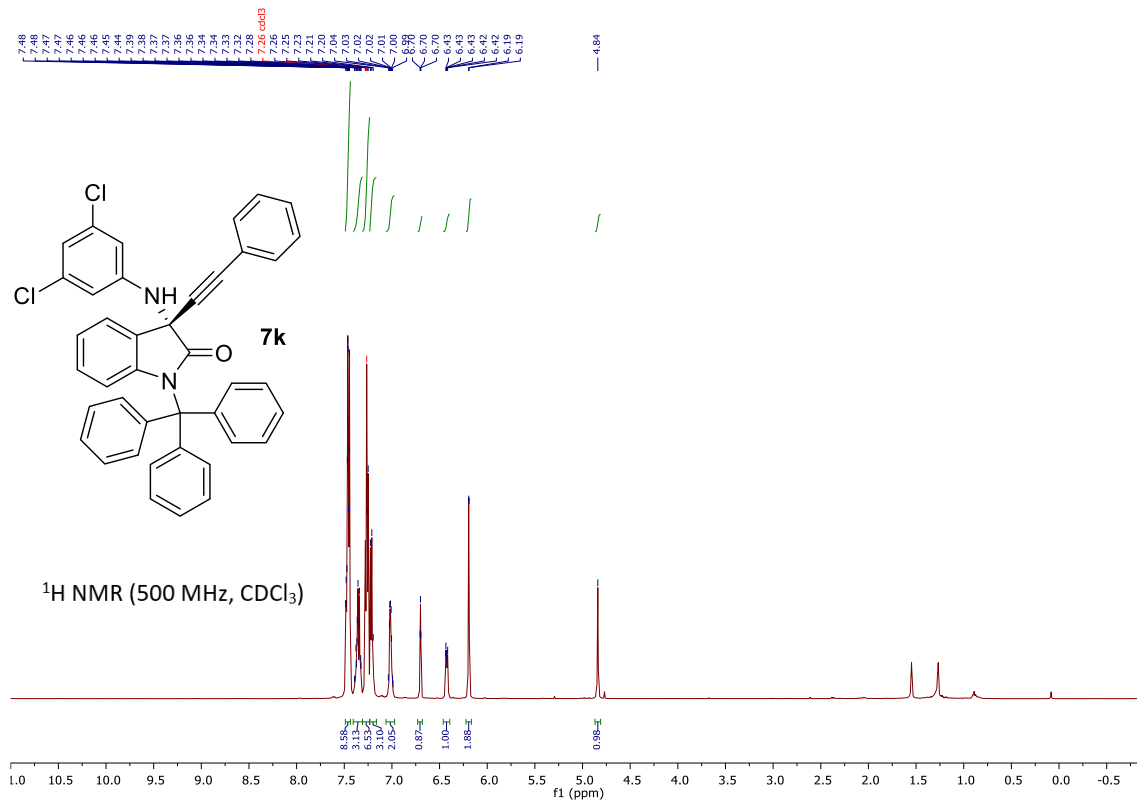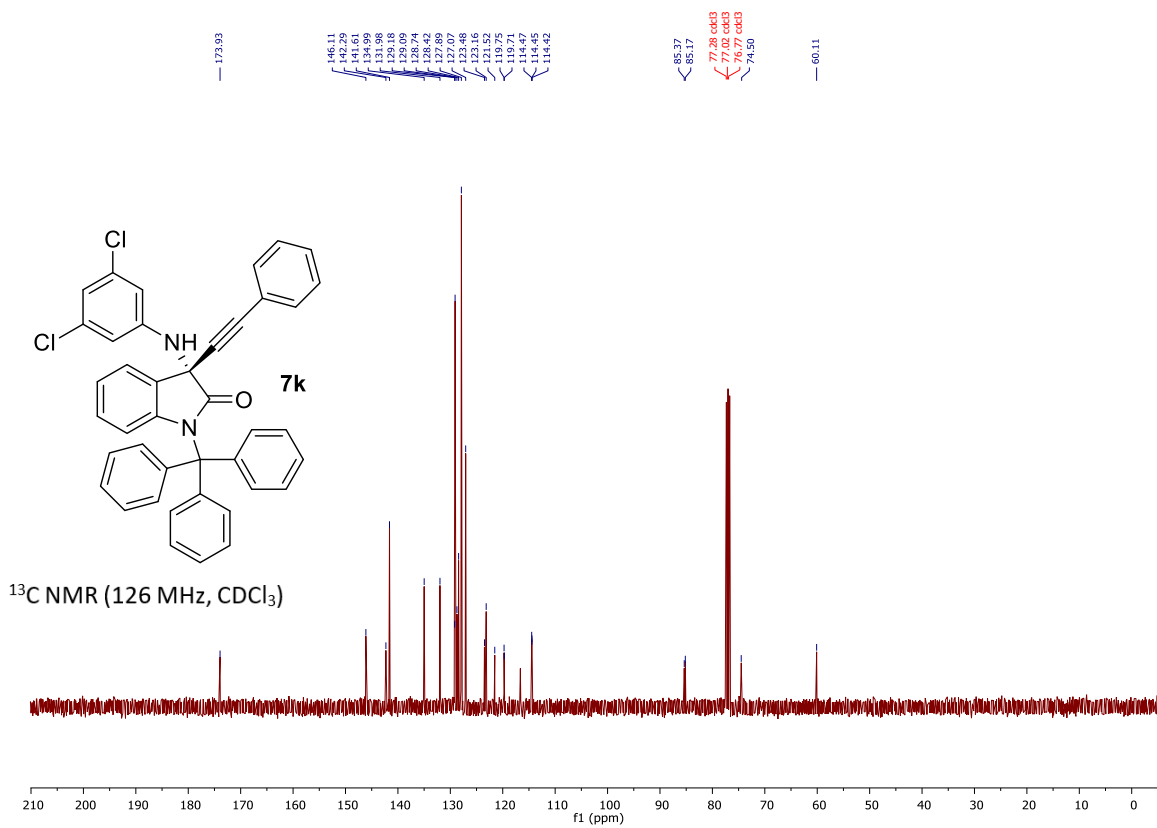

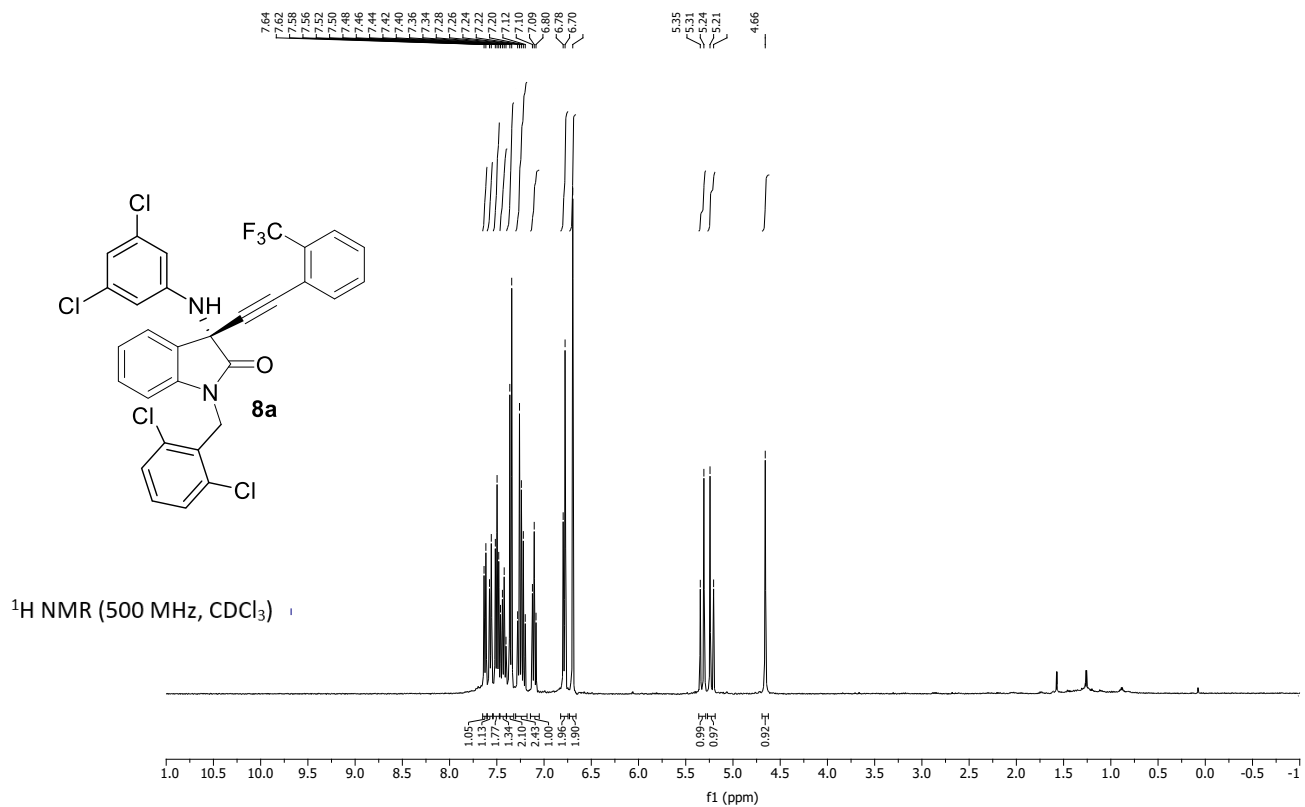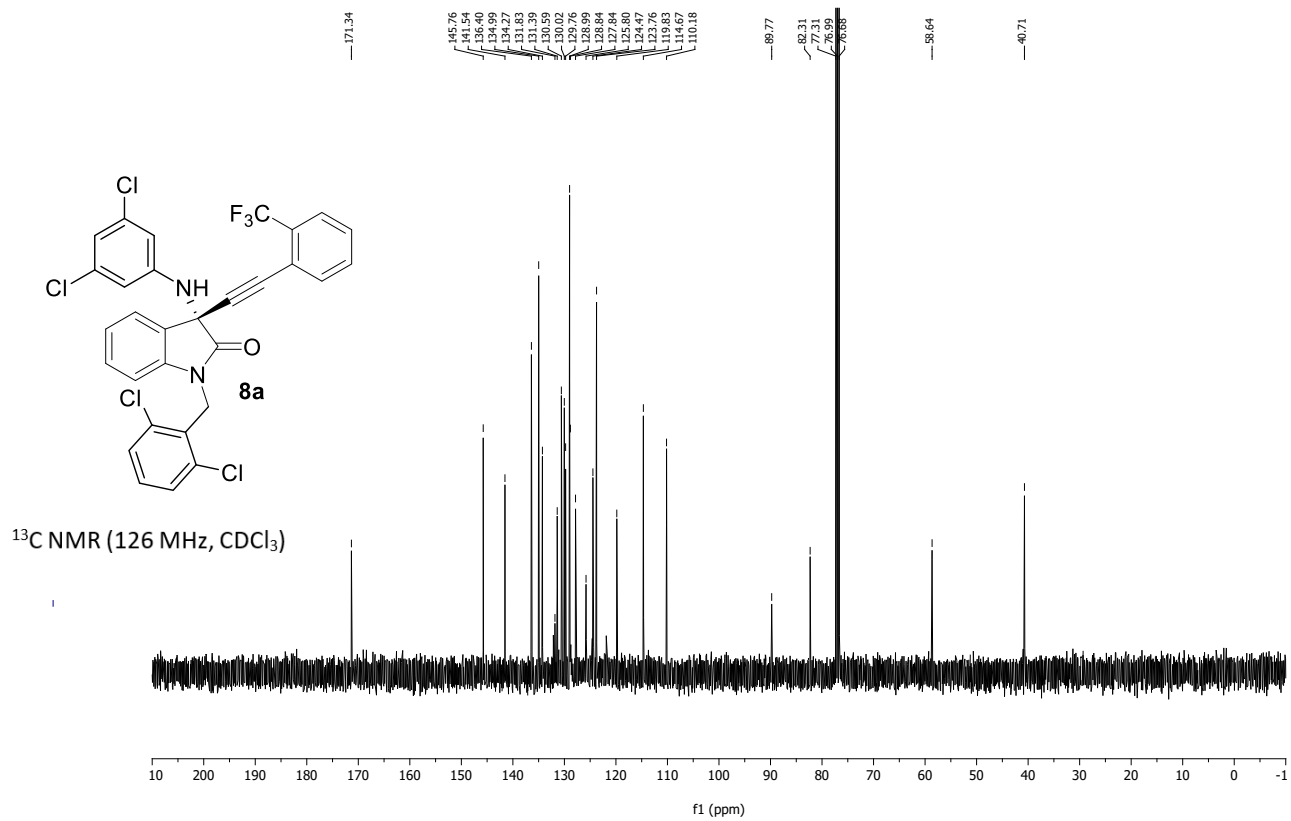



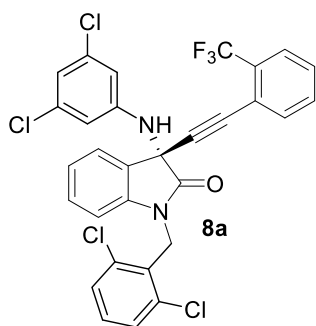

$^{19}\text{F}$  NMR (470 MHz,  $\text{CDCl}_3$ )

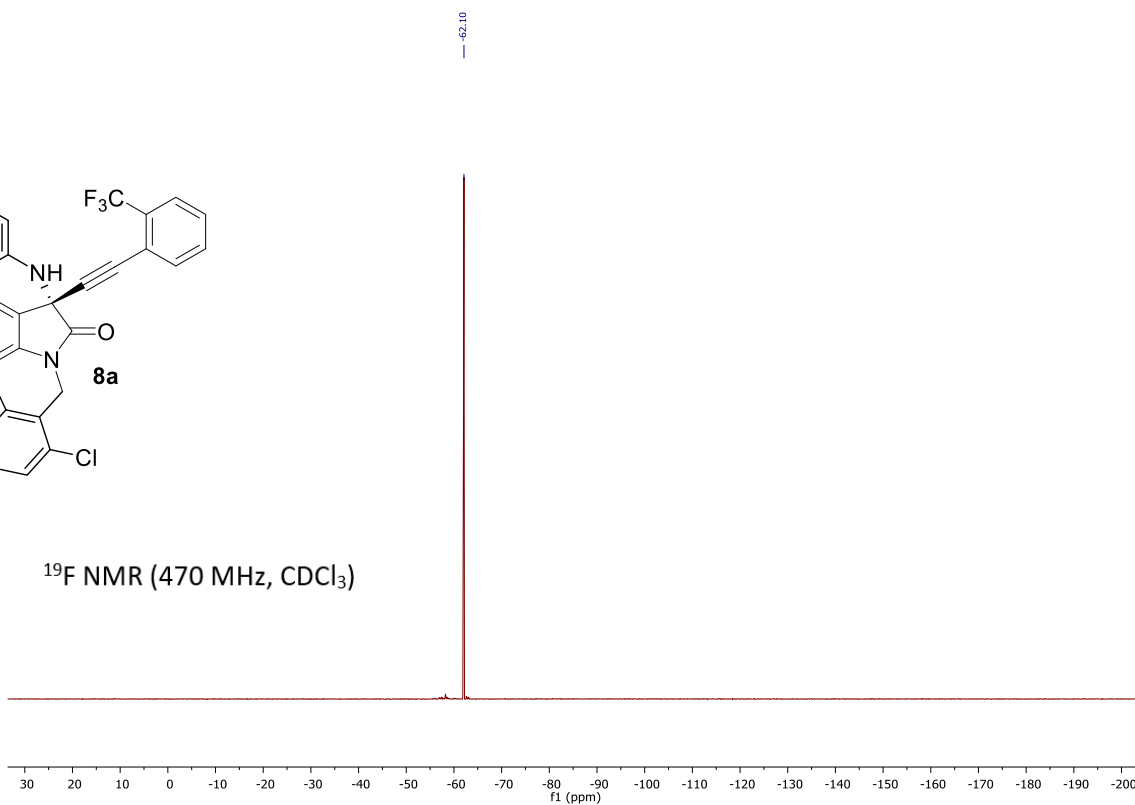

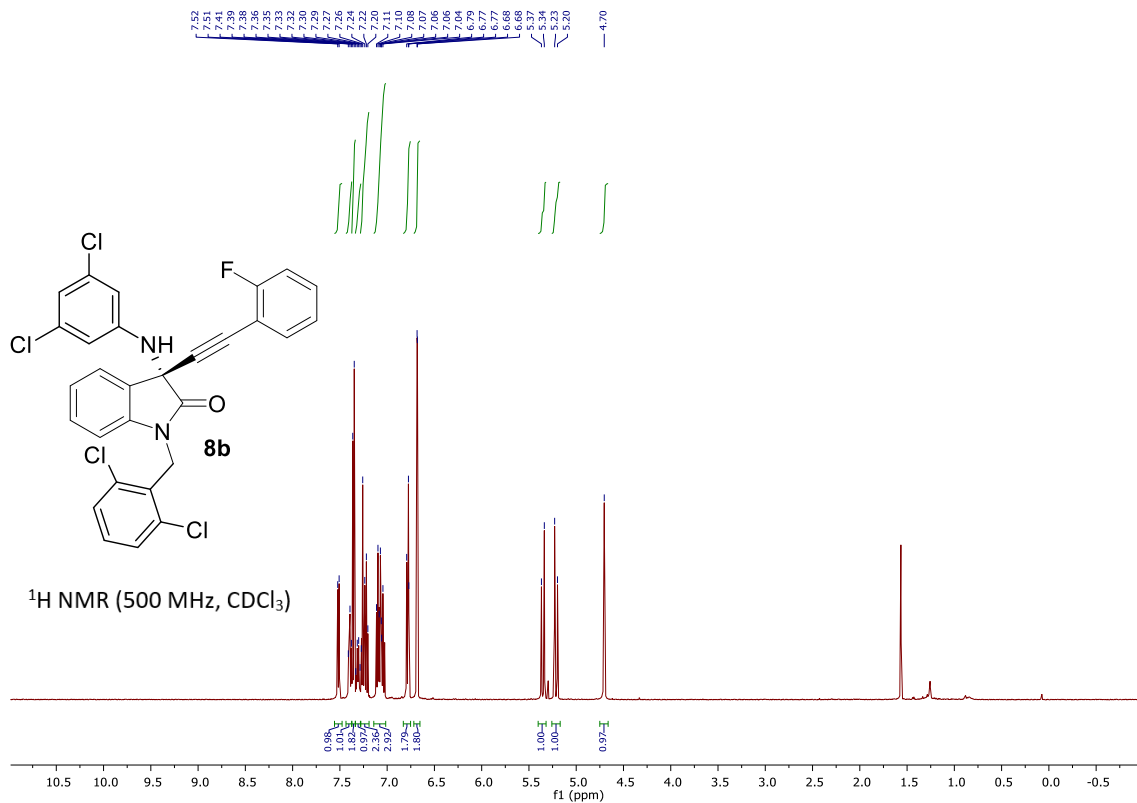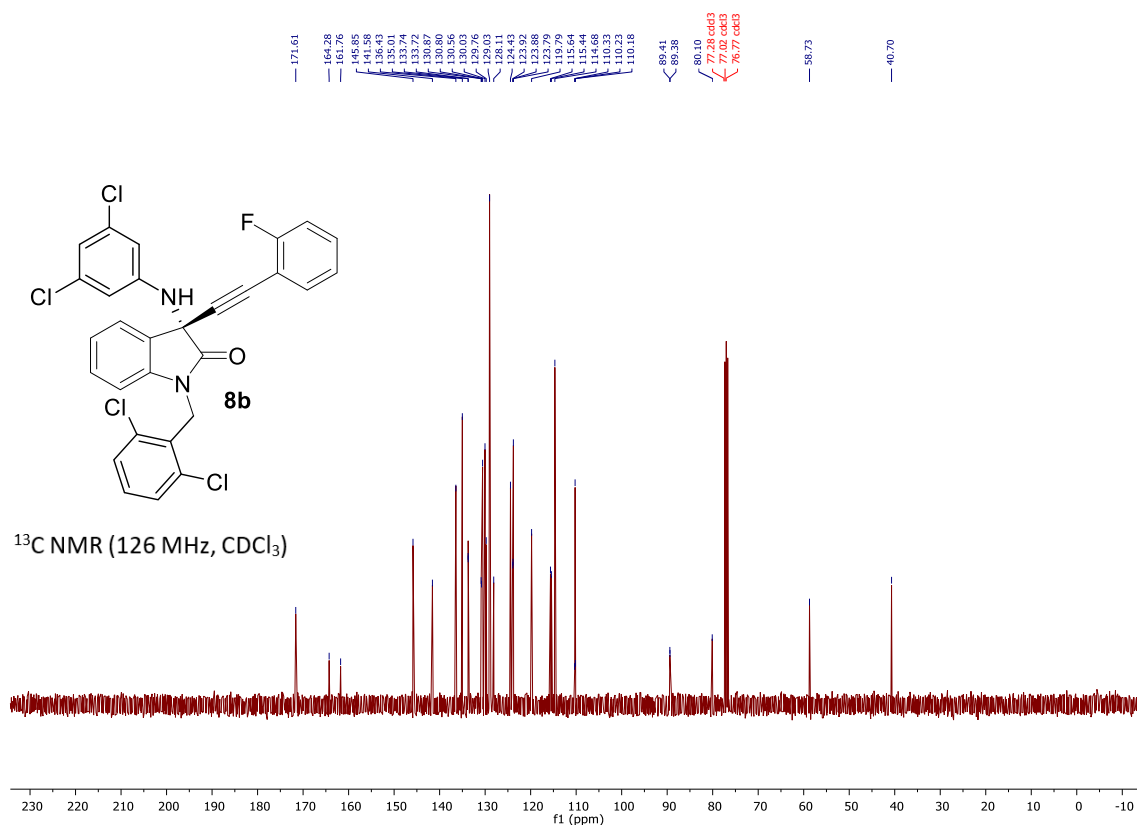

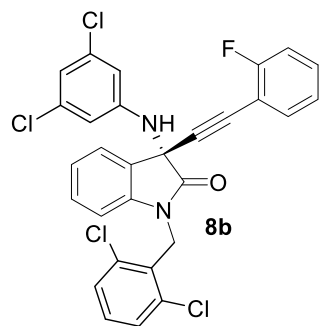

$^{19}\text{F}$  NMR (470 MHz,  $\text{CDCl}_3$ )

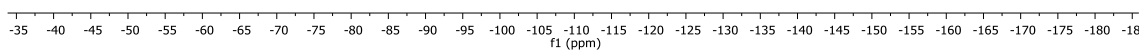

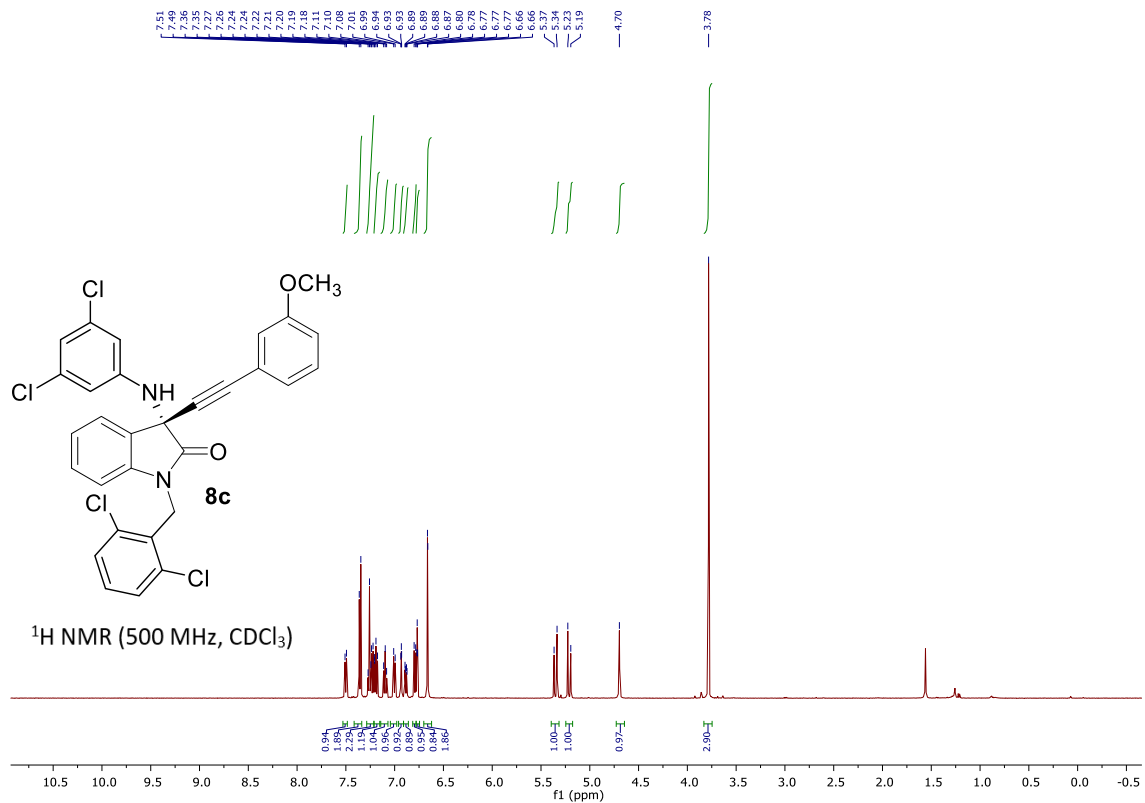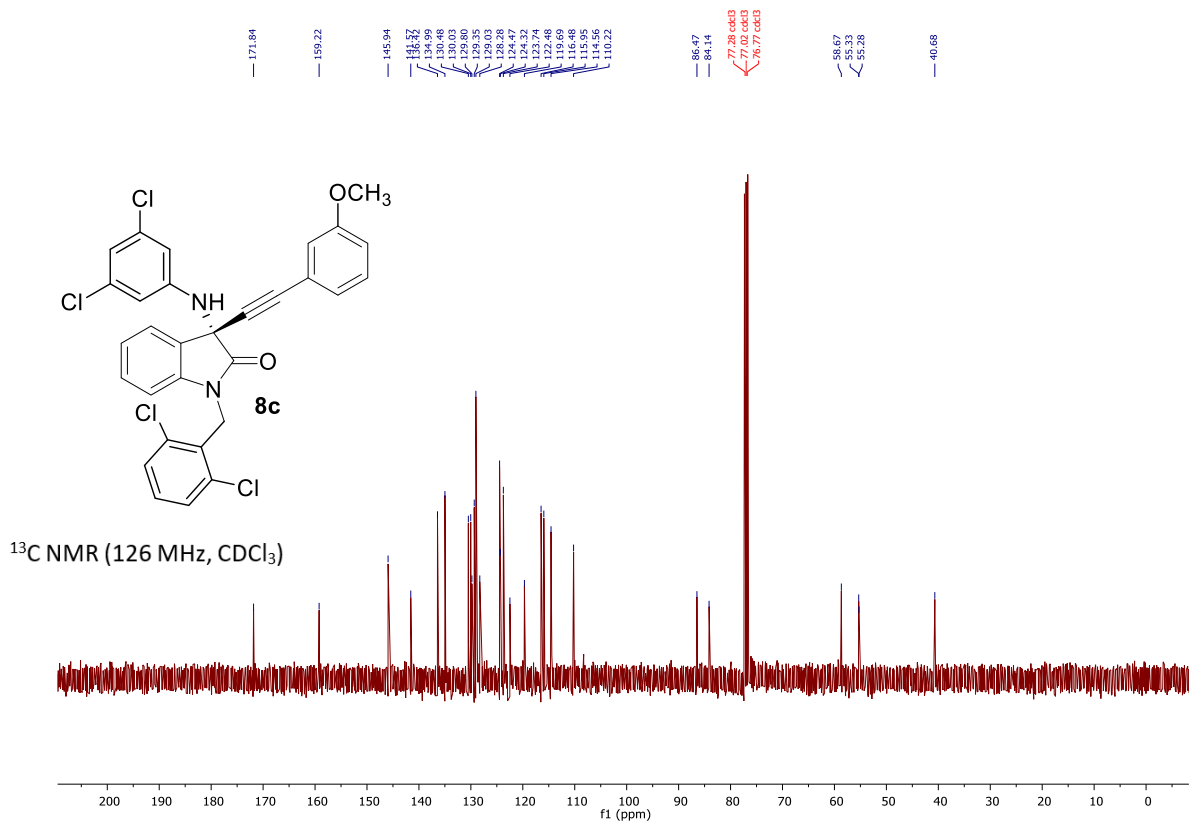

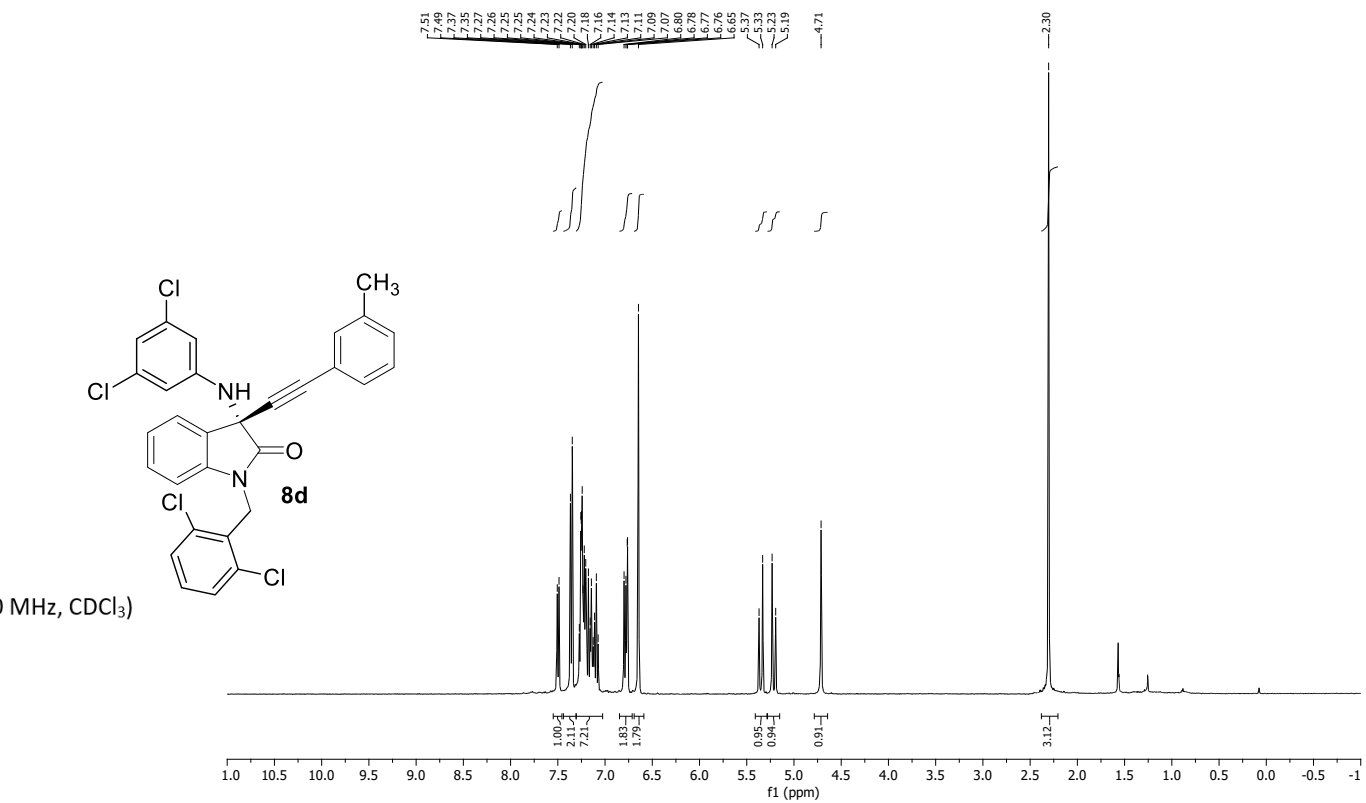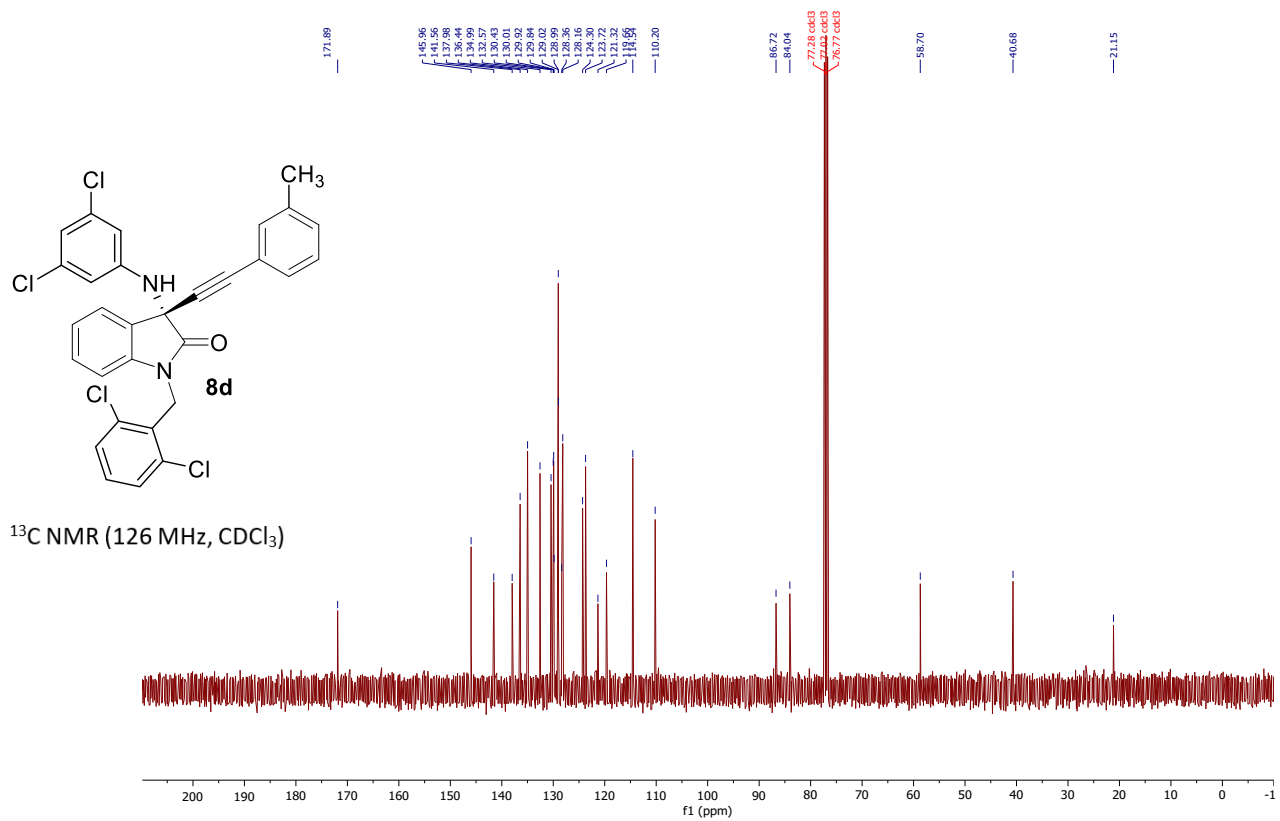

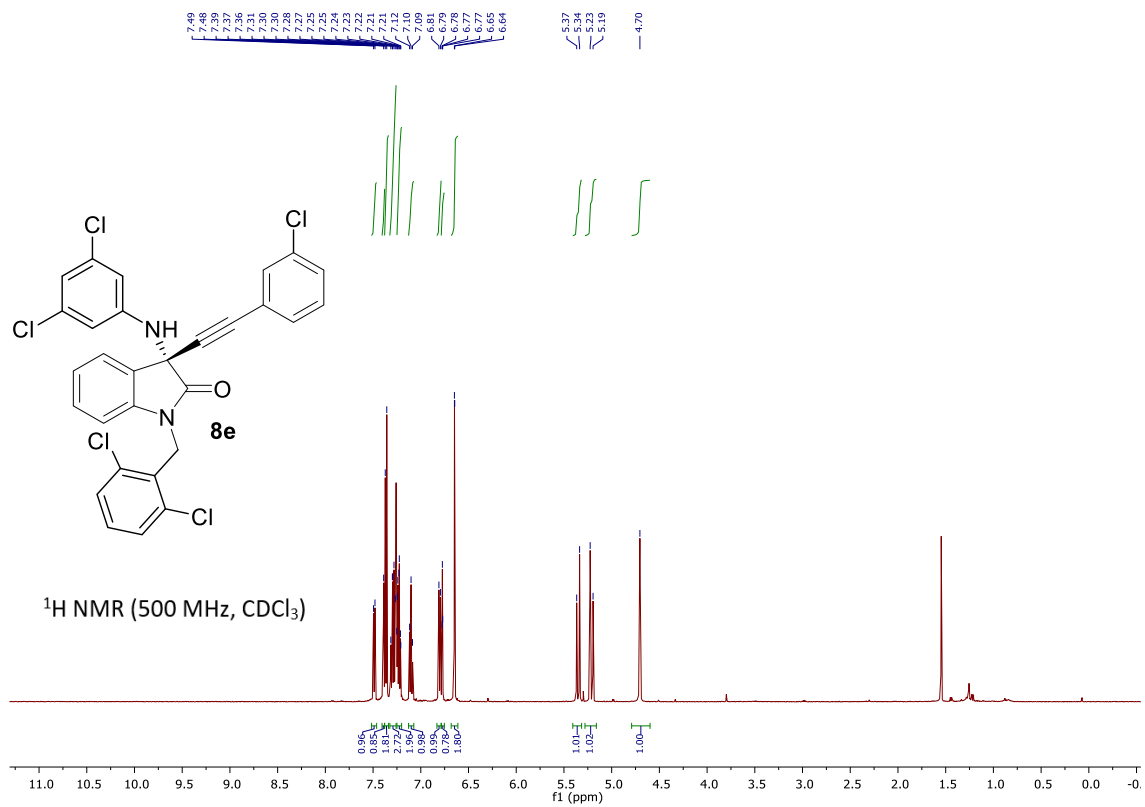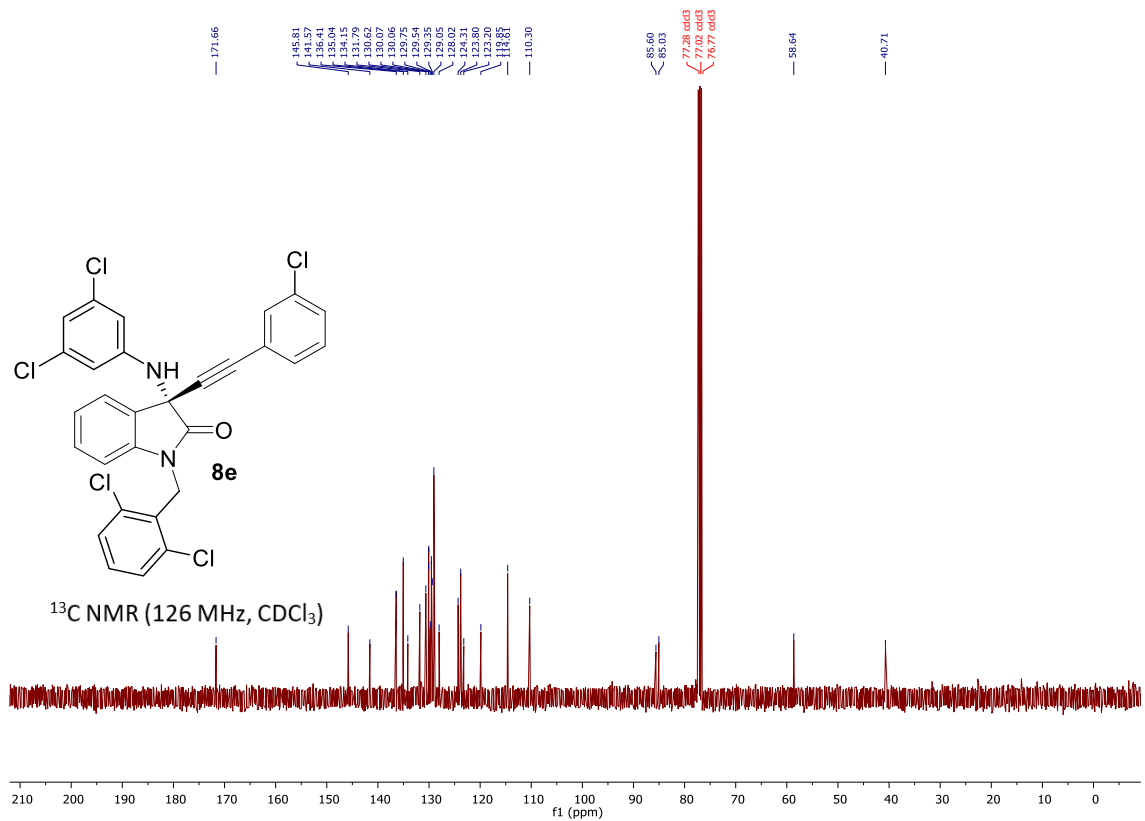

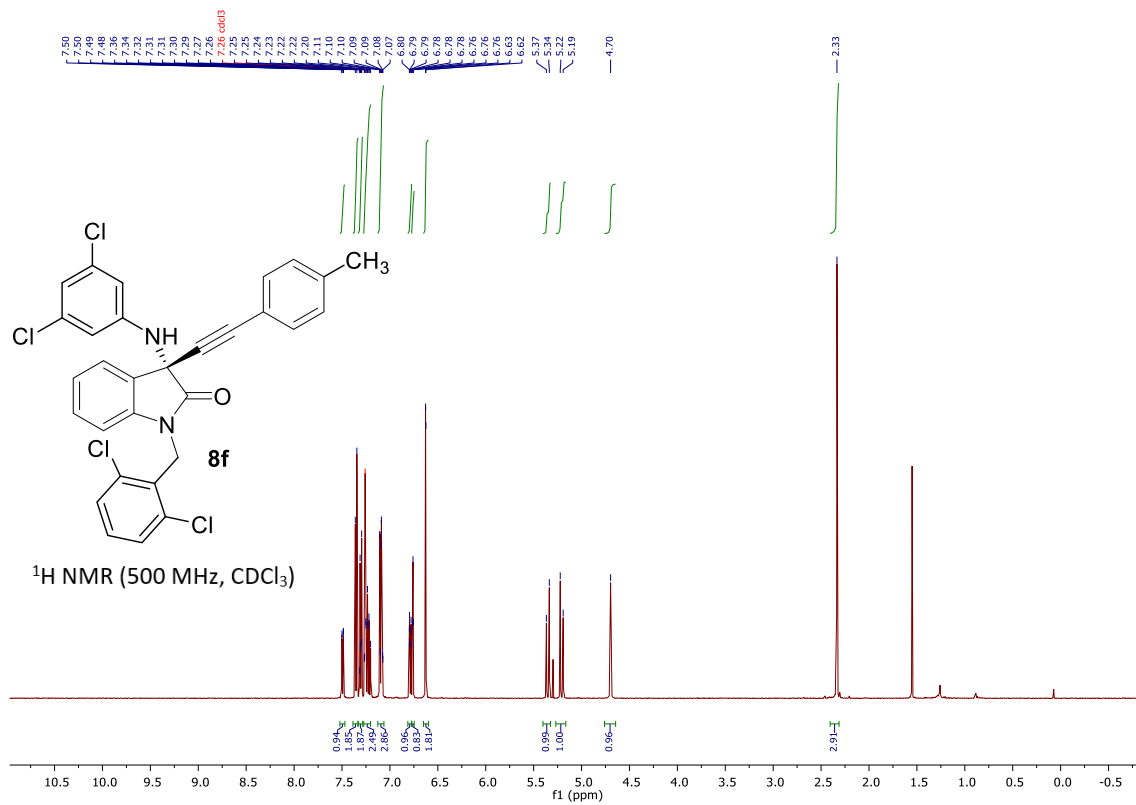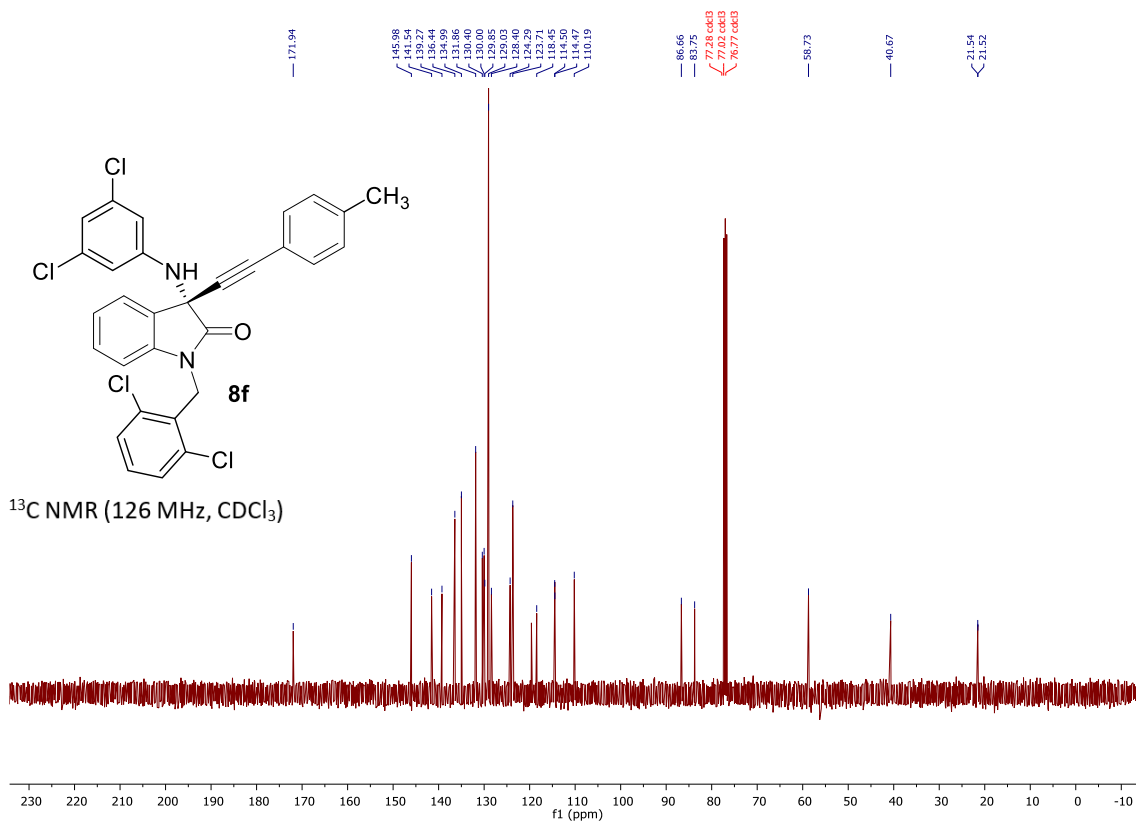

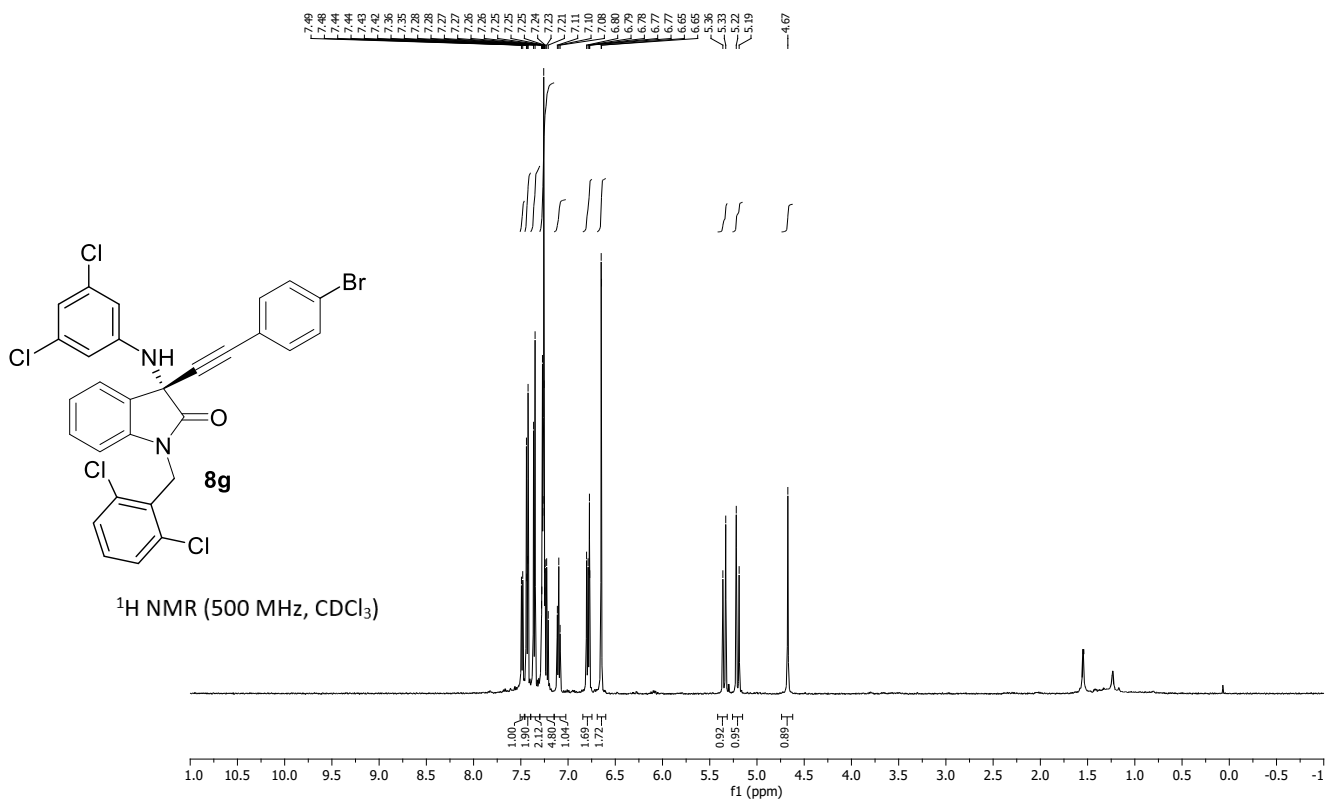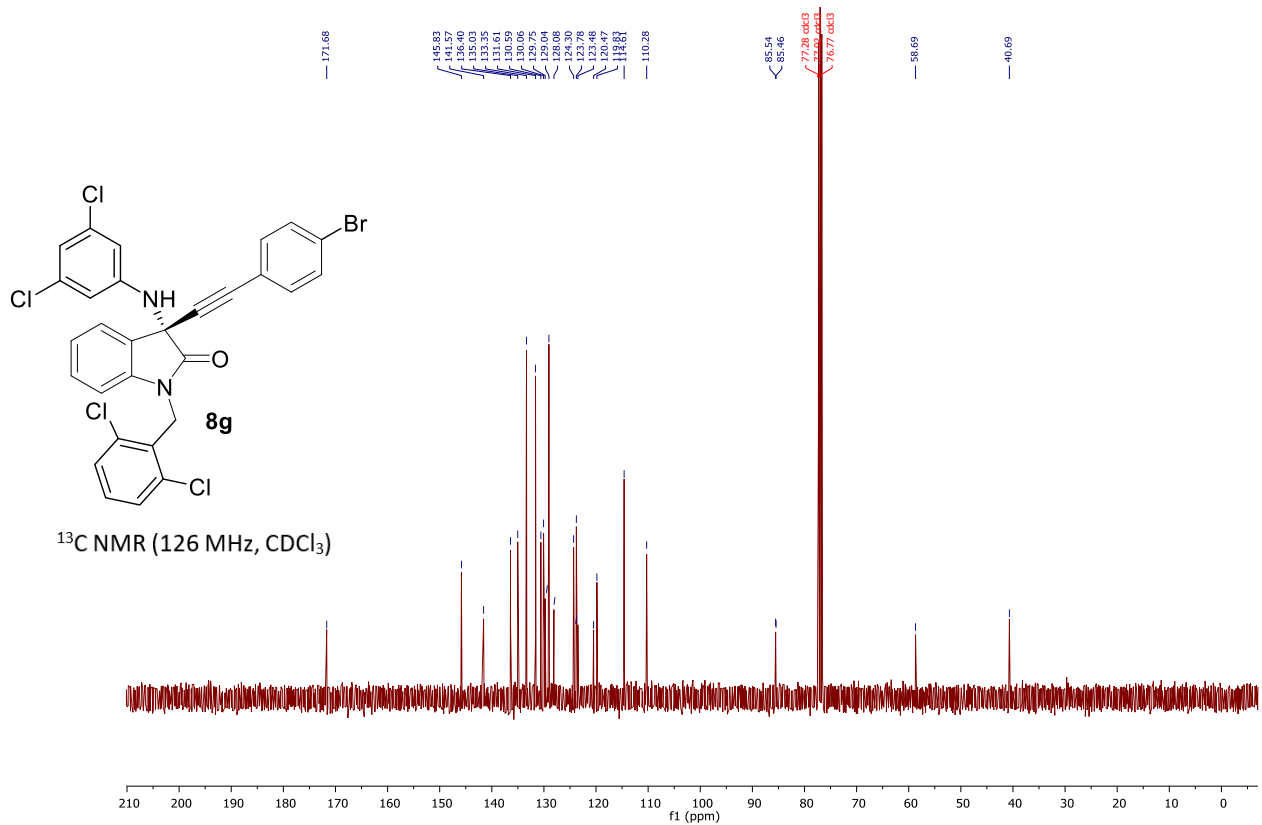



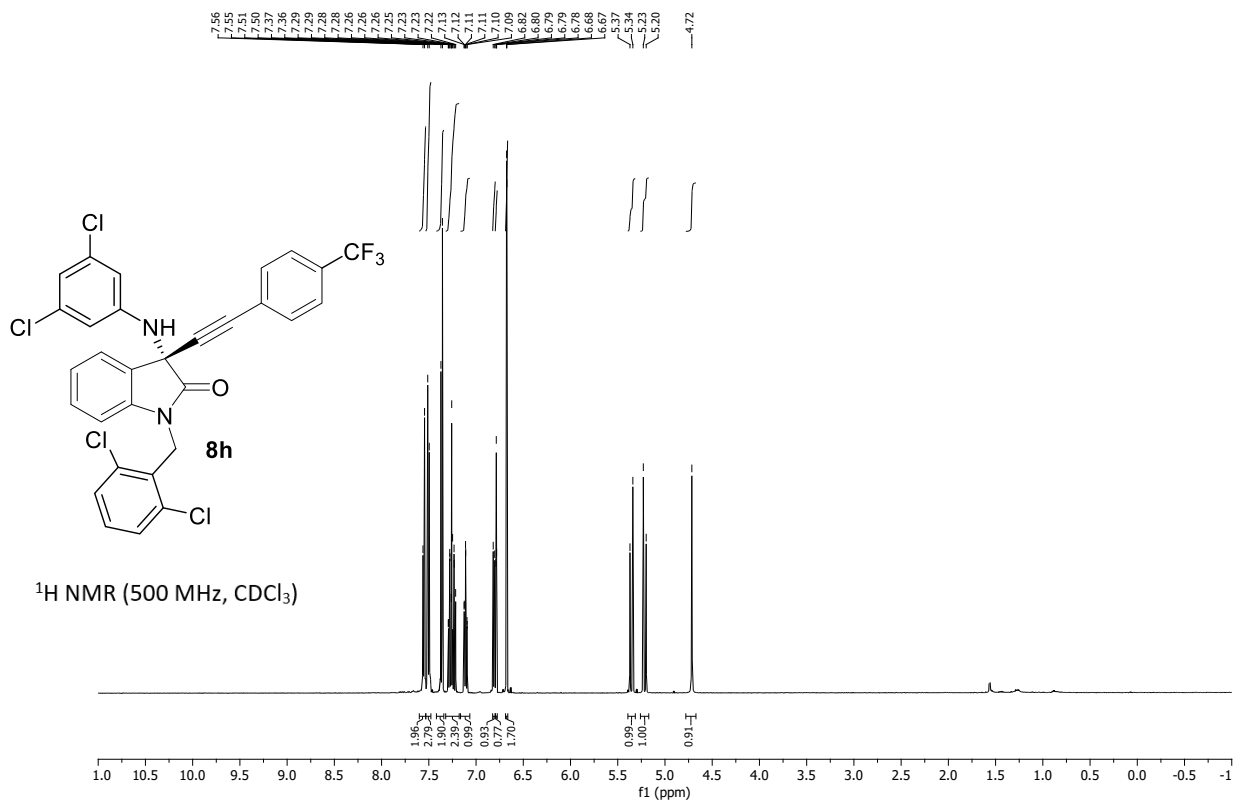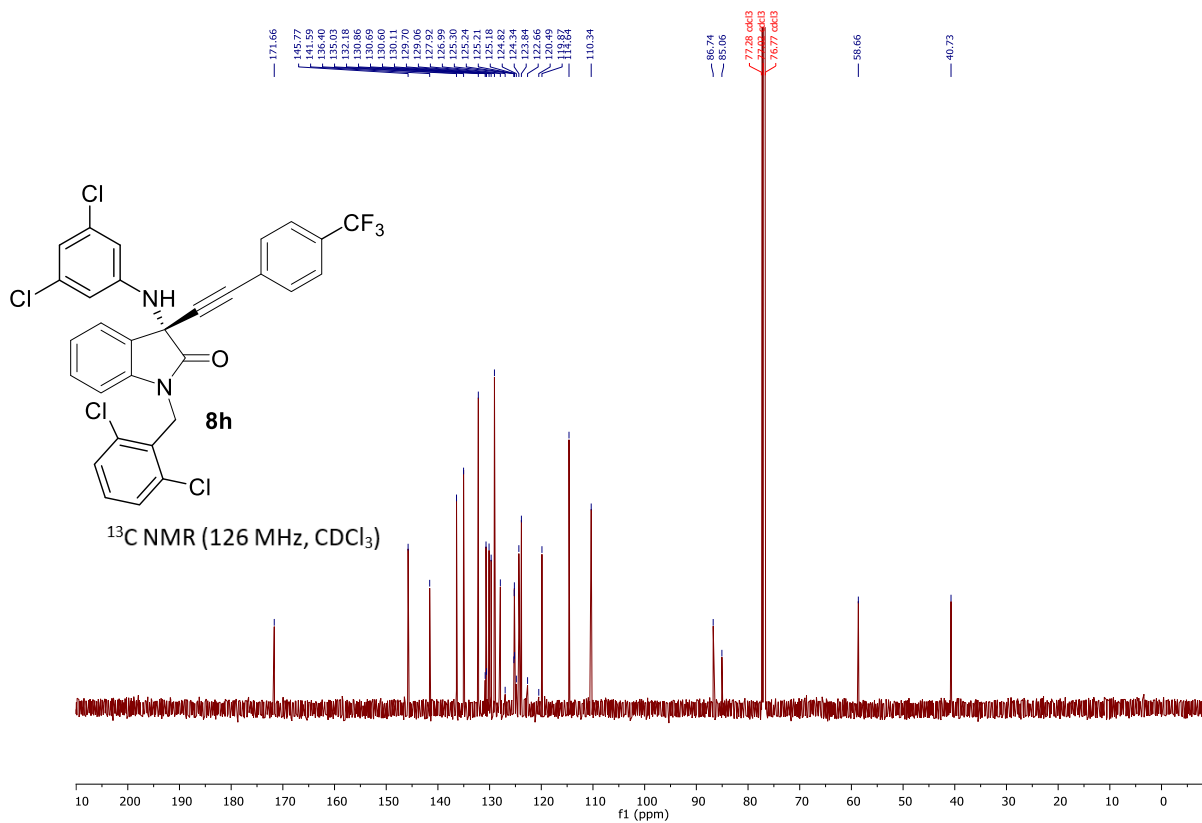

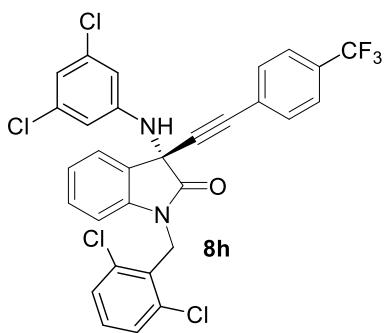

$^{19}\text{F}$  NMR (470 MHz,  $\text{CDCl}_3$ )

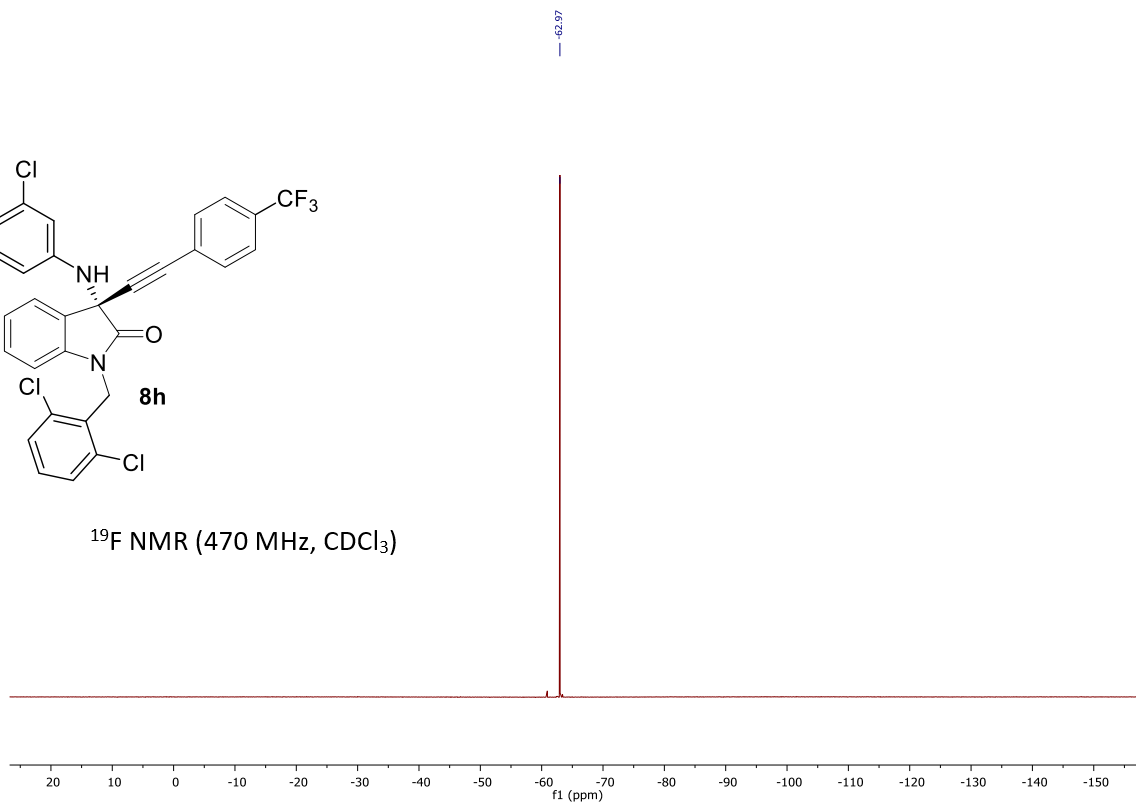

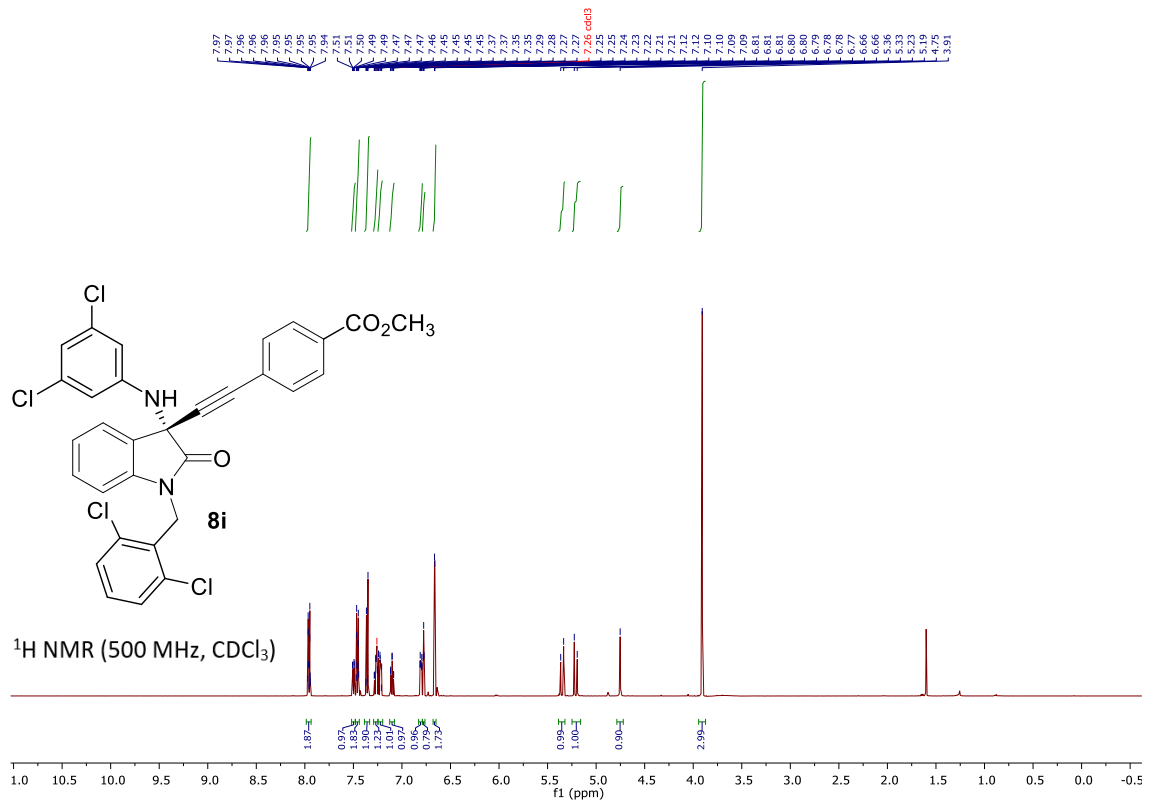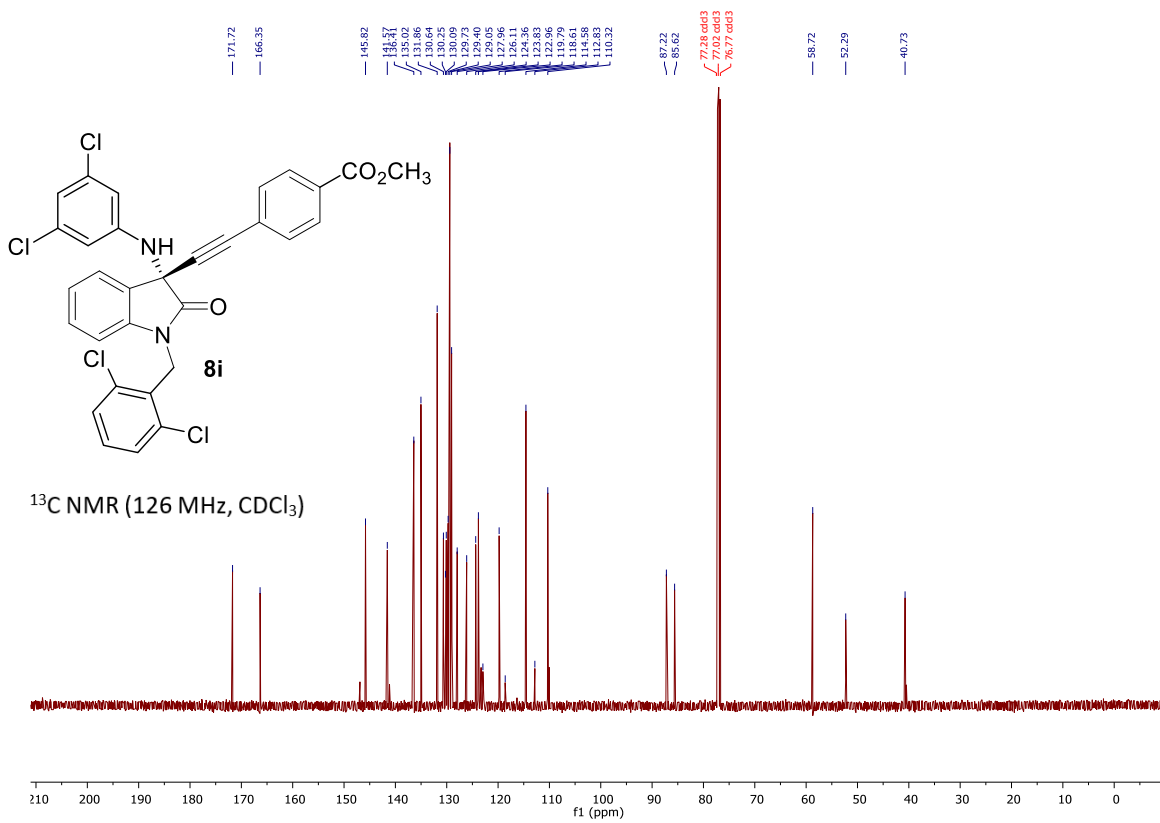

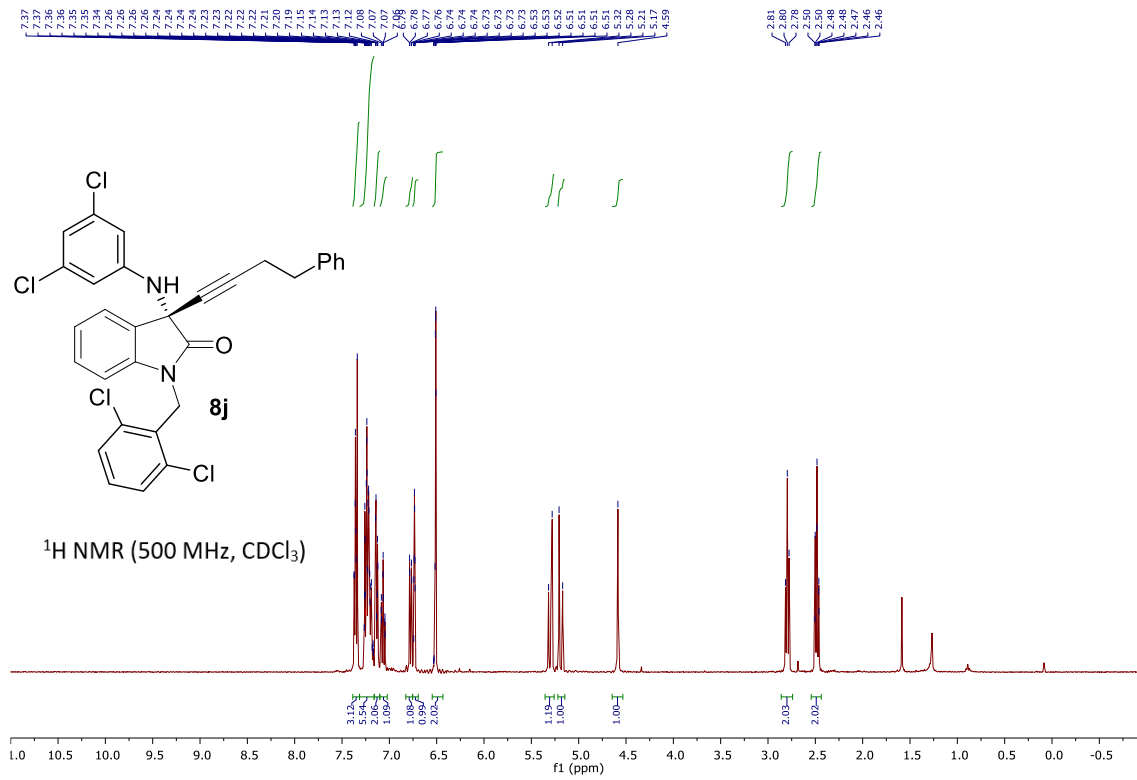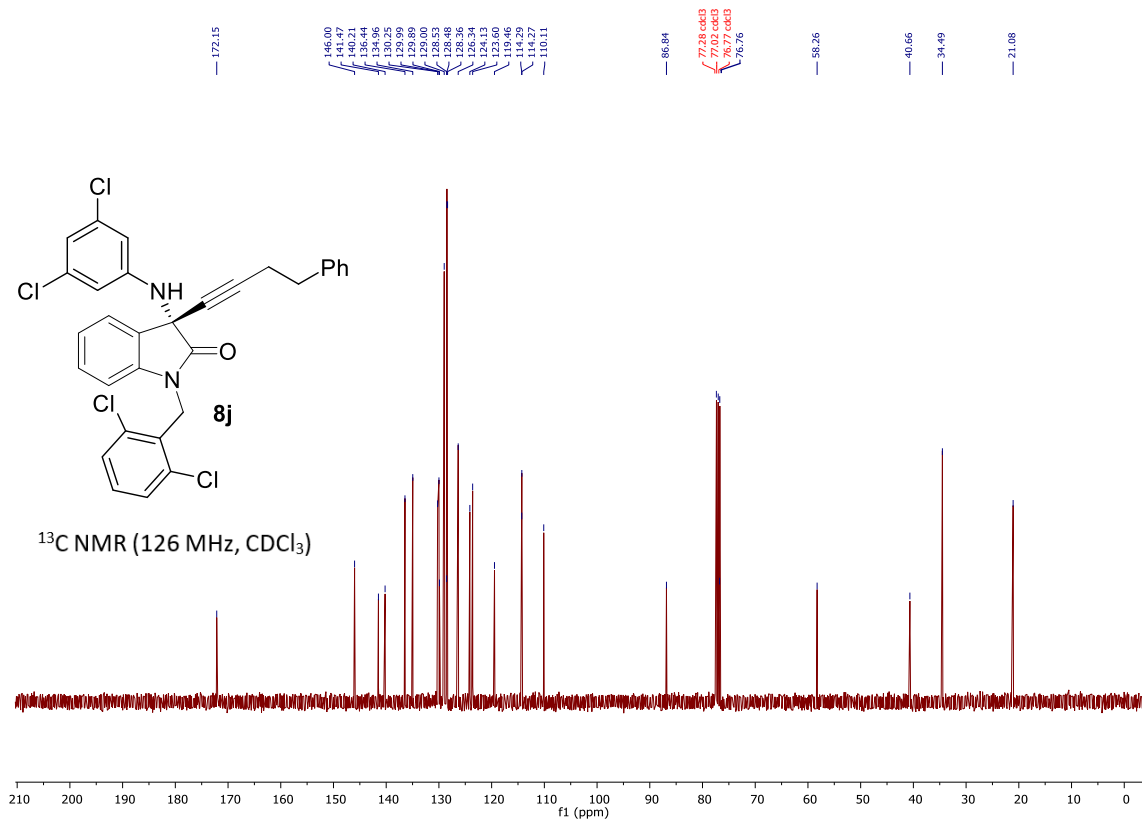

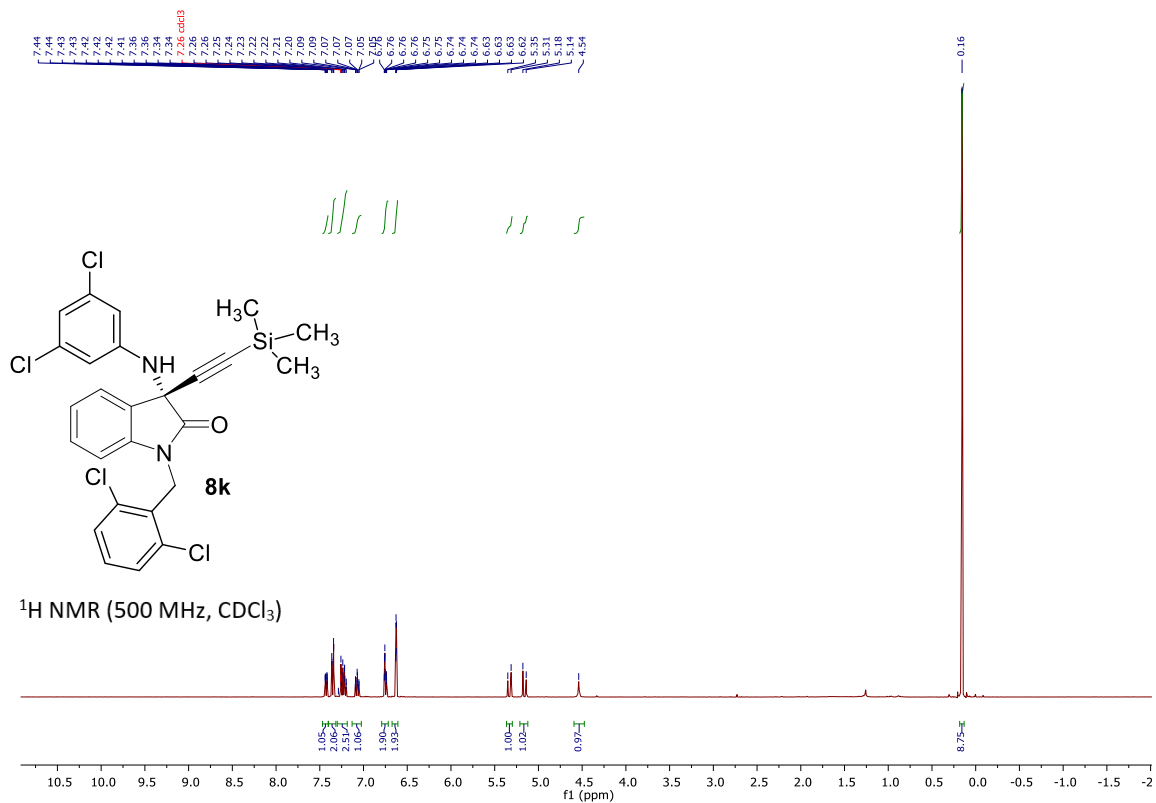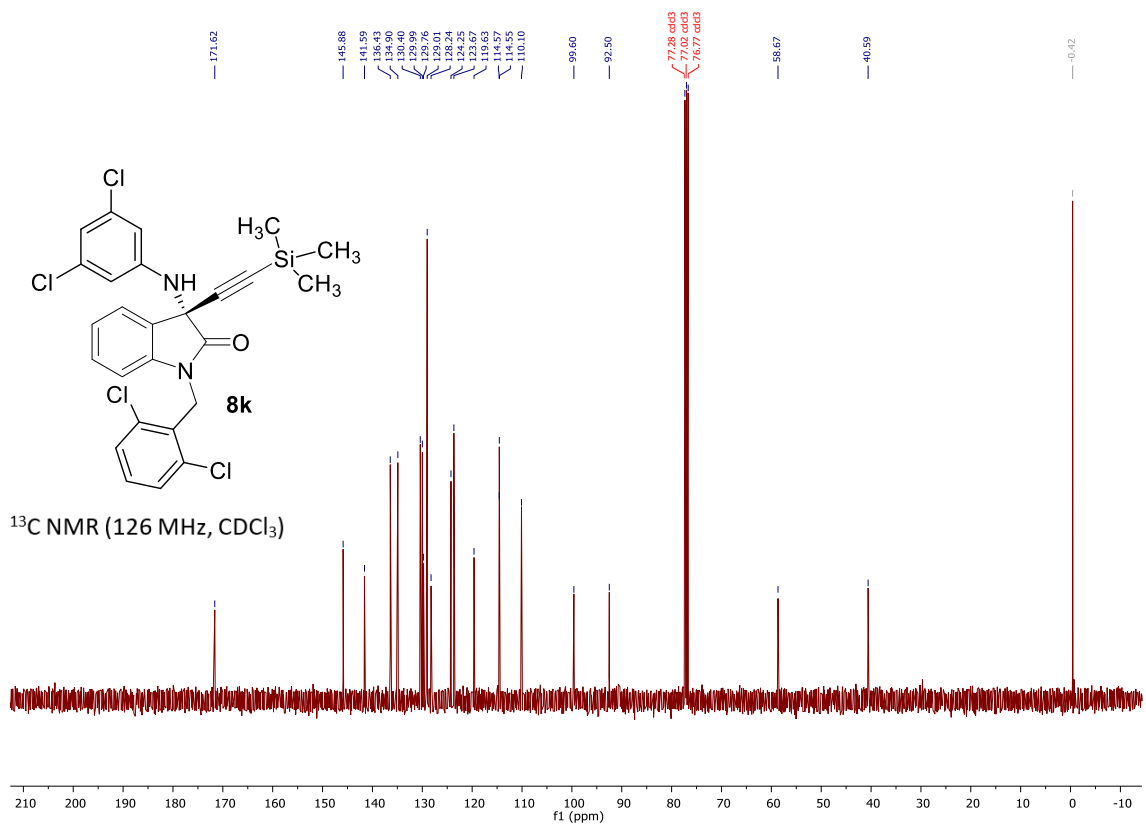

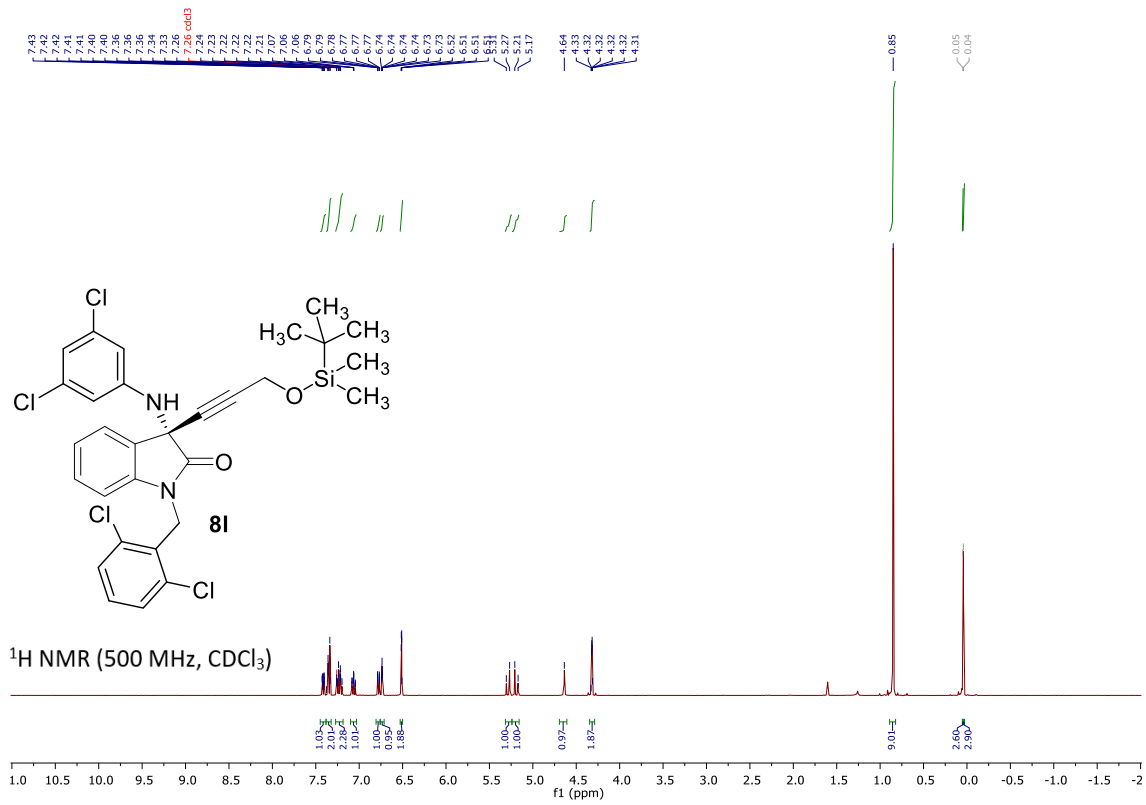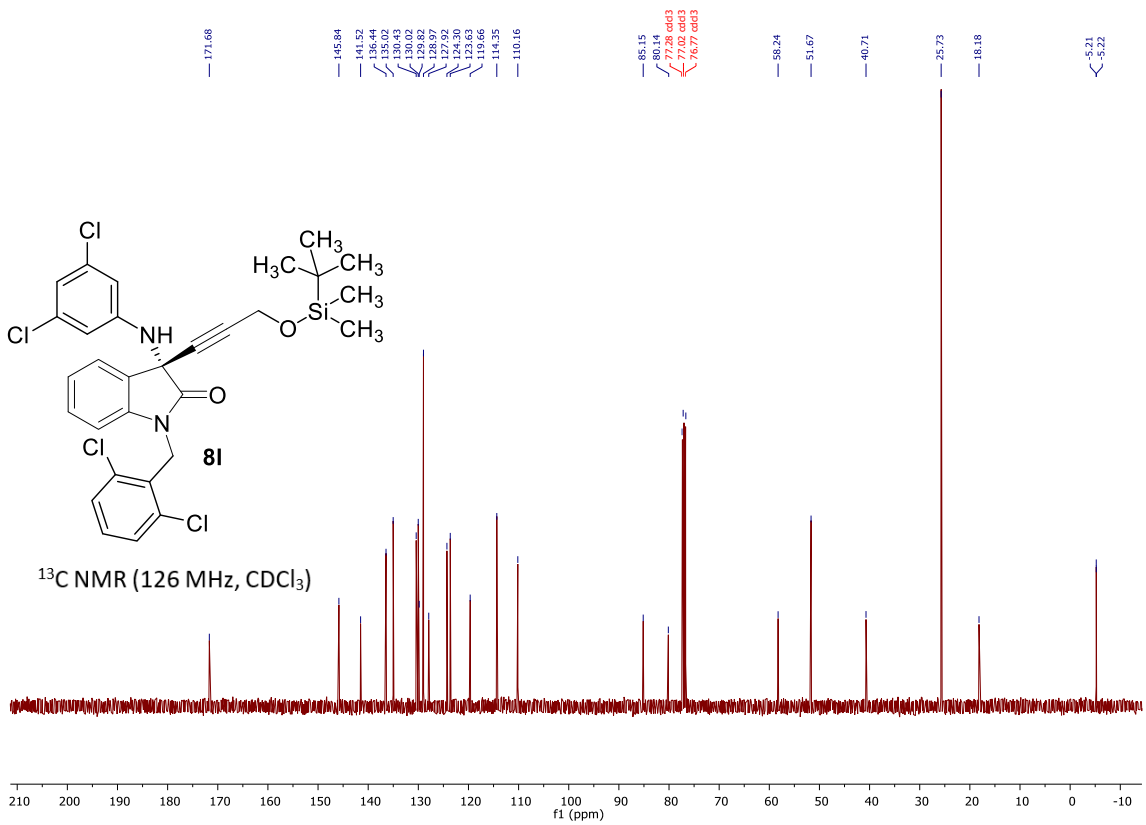

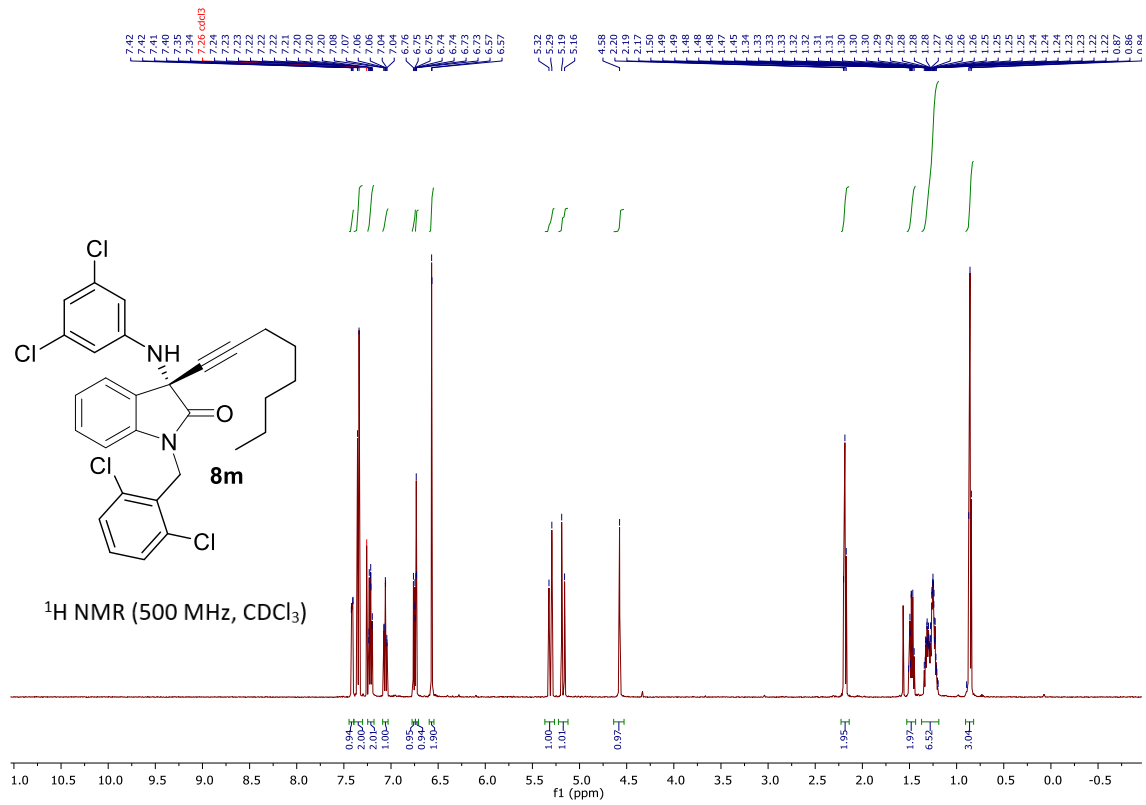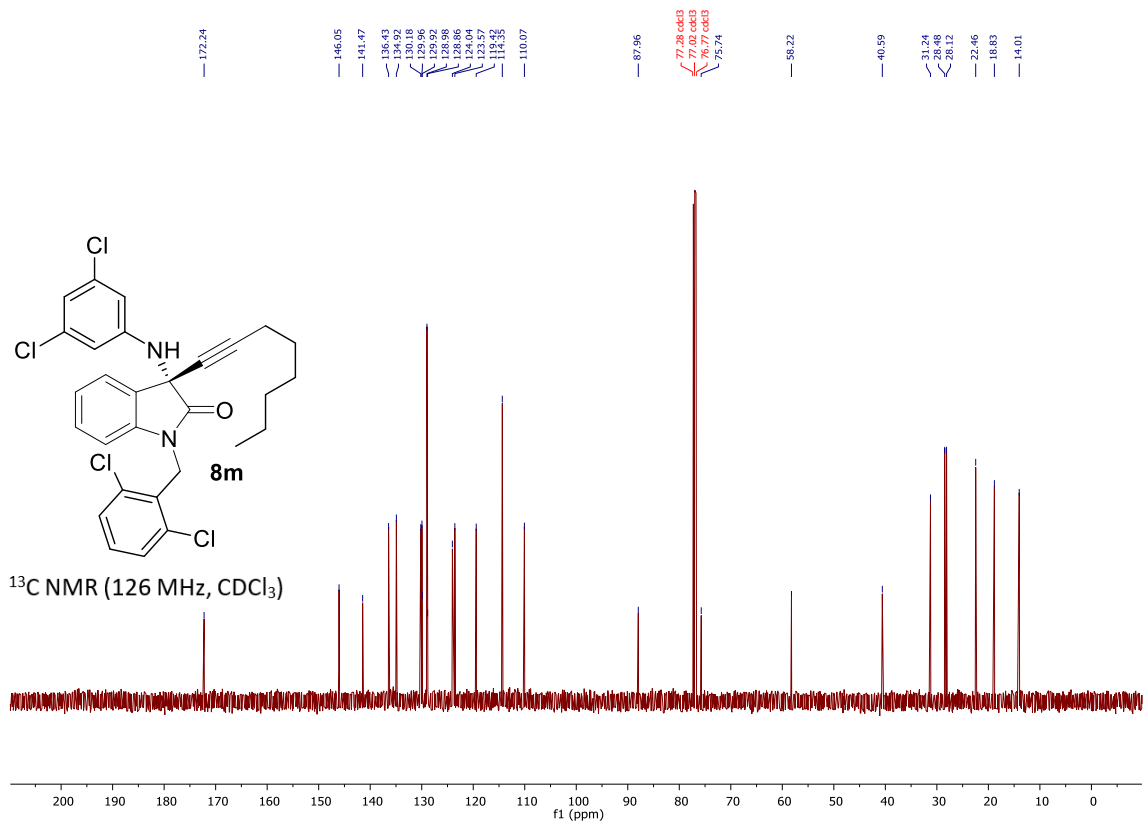

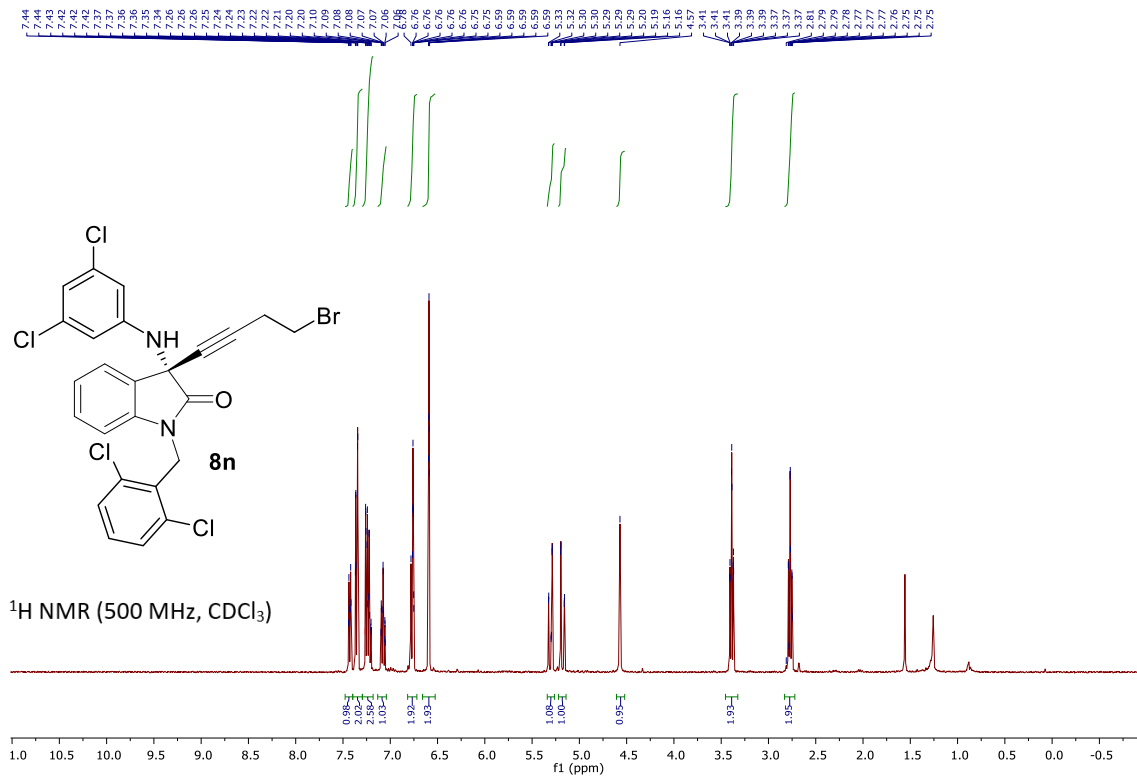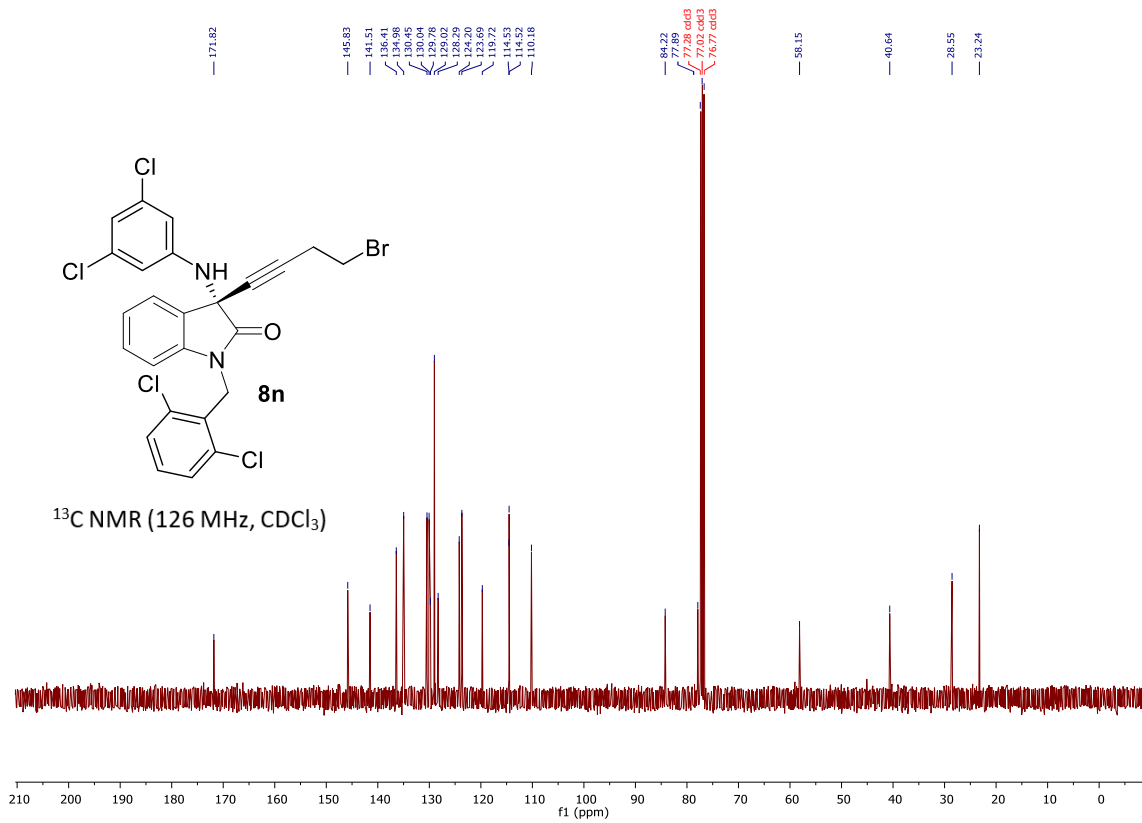



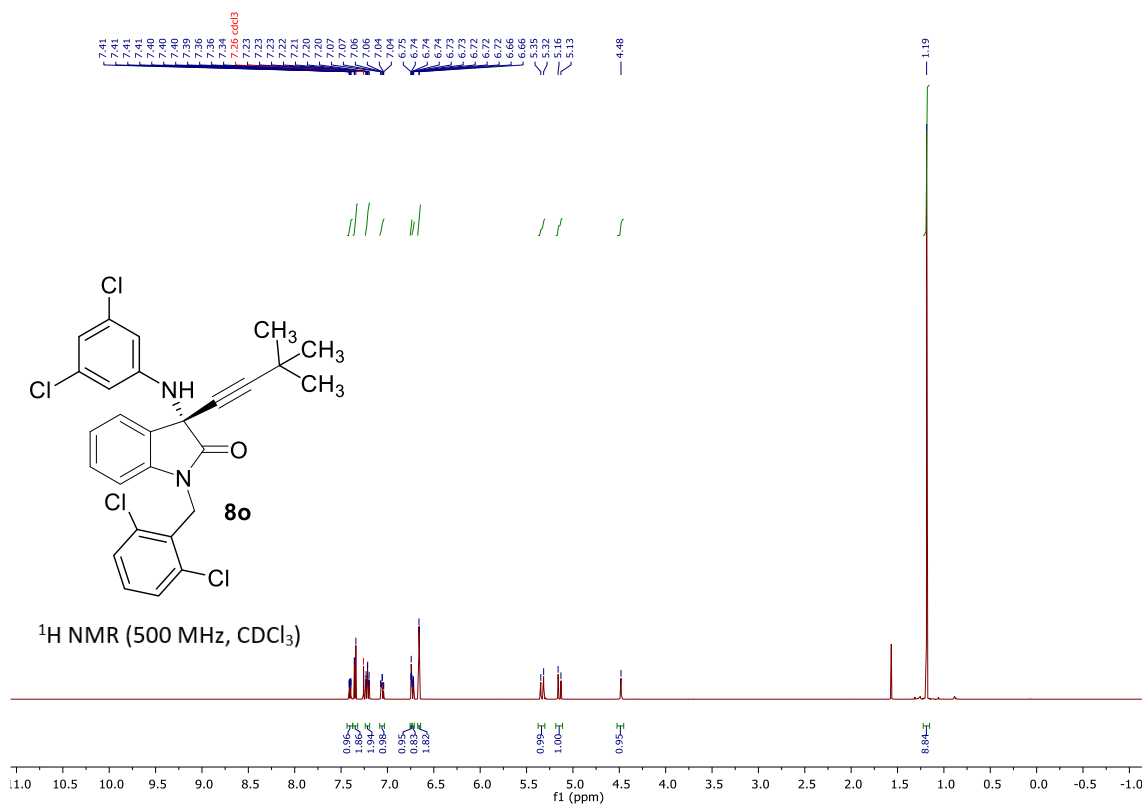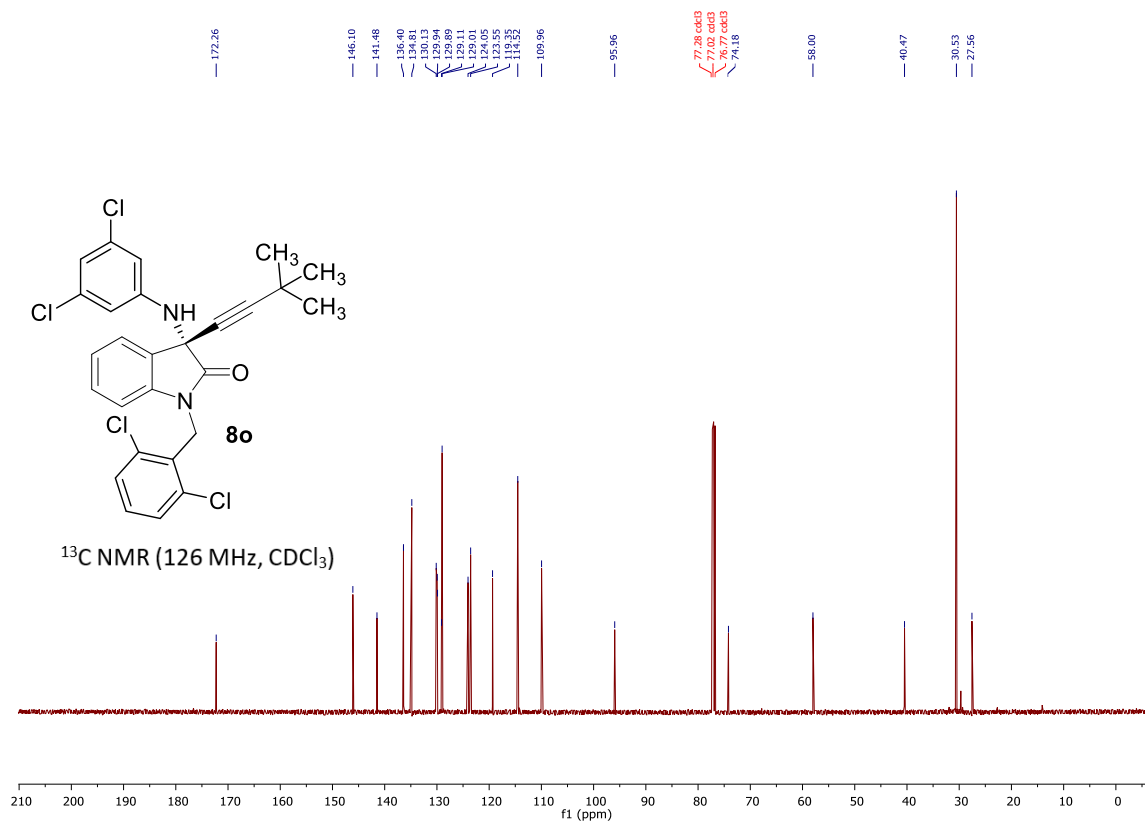

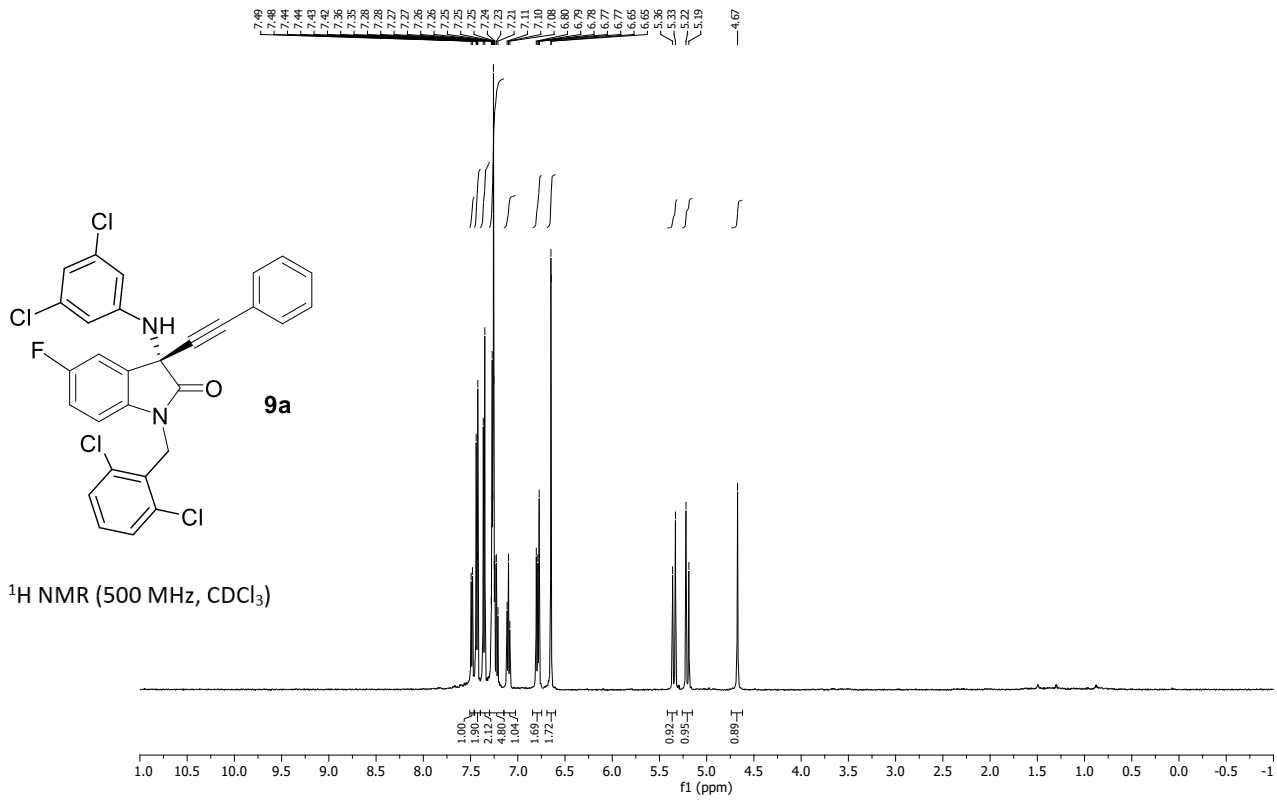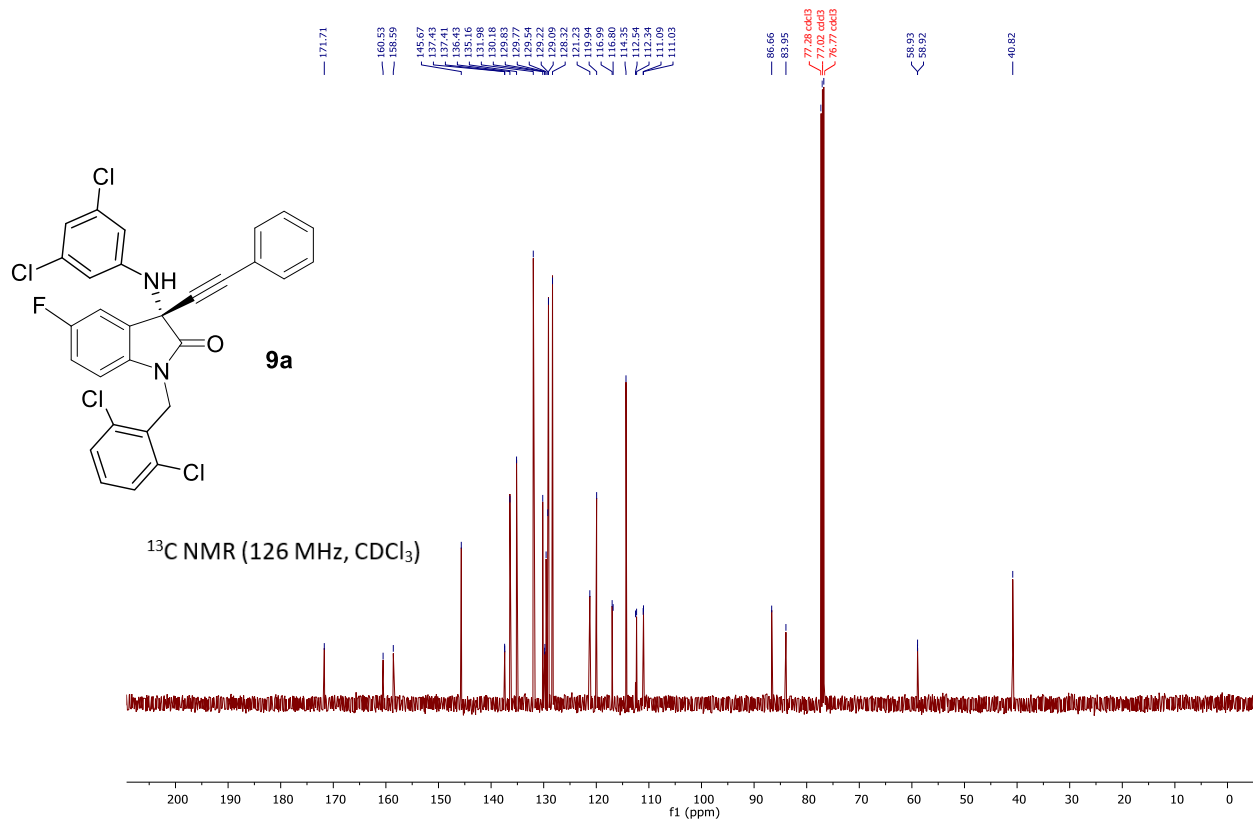

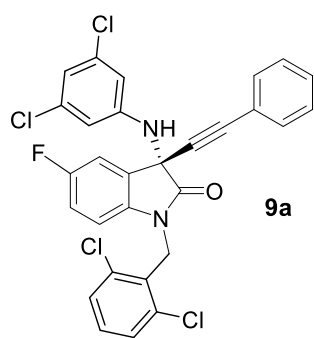

<sup>19</sup>F NMR (470 MHz, CDCl<sub>3</sub>)

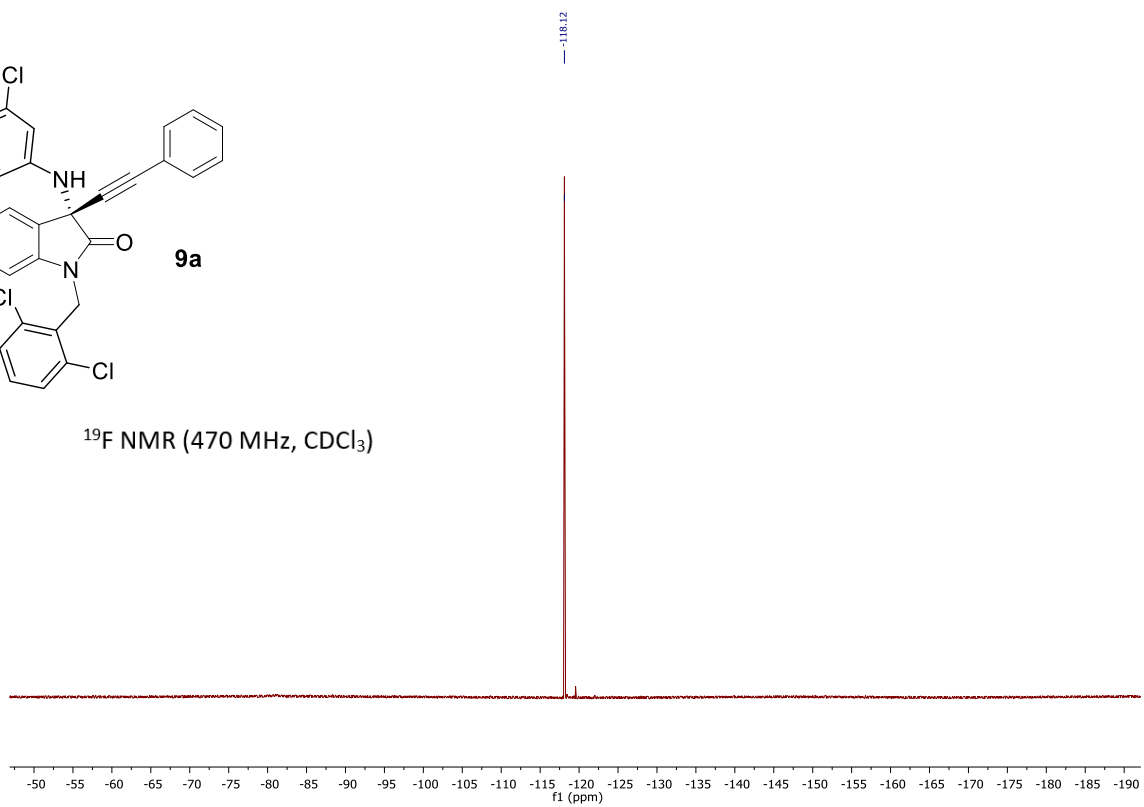

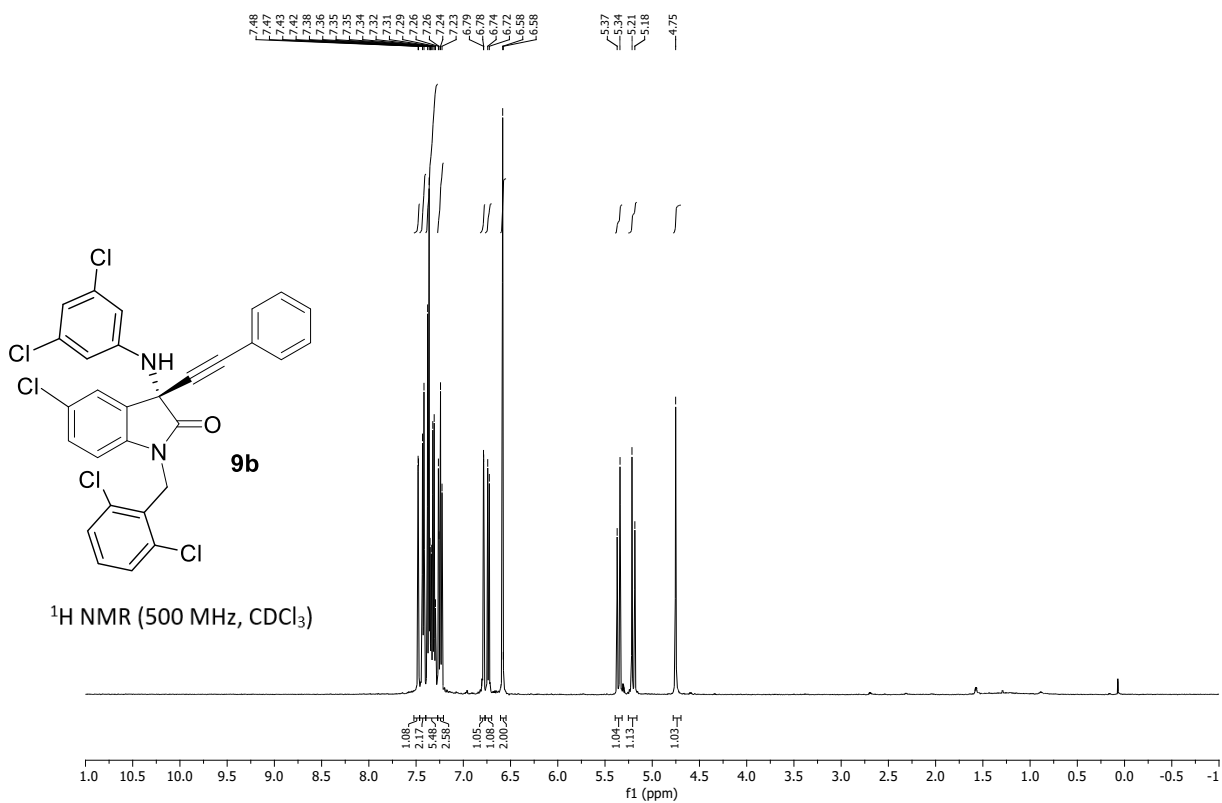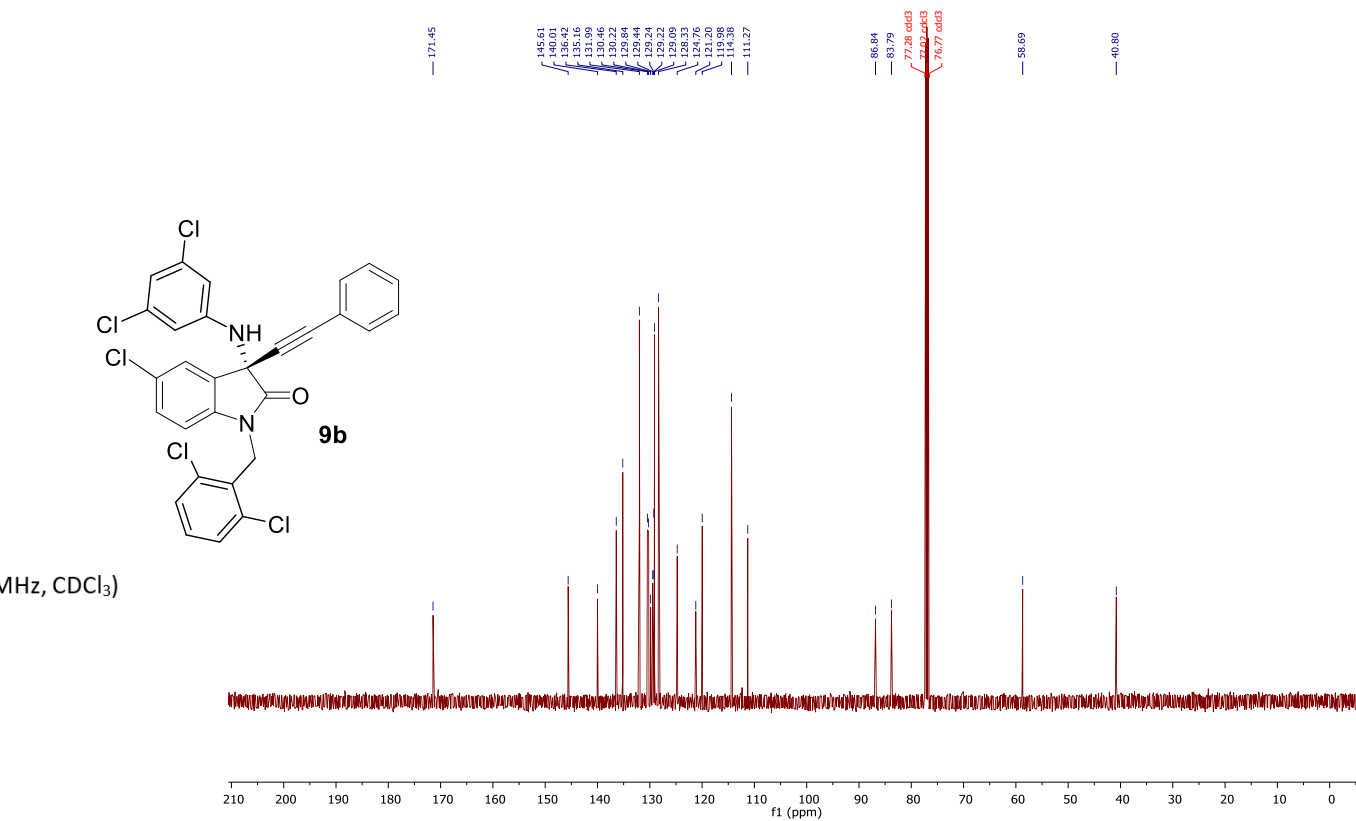

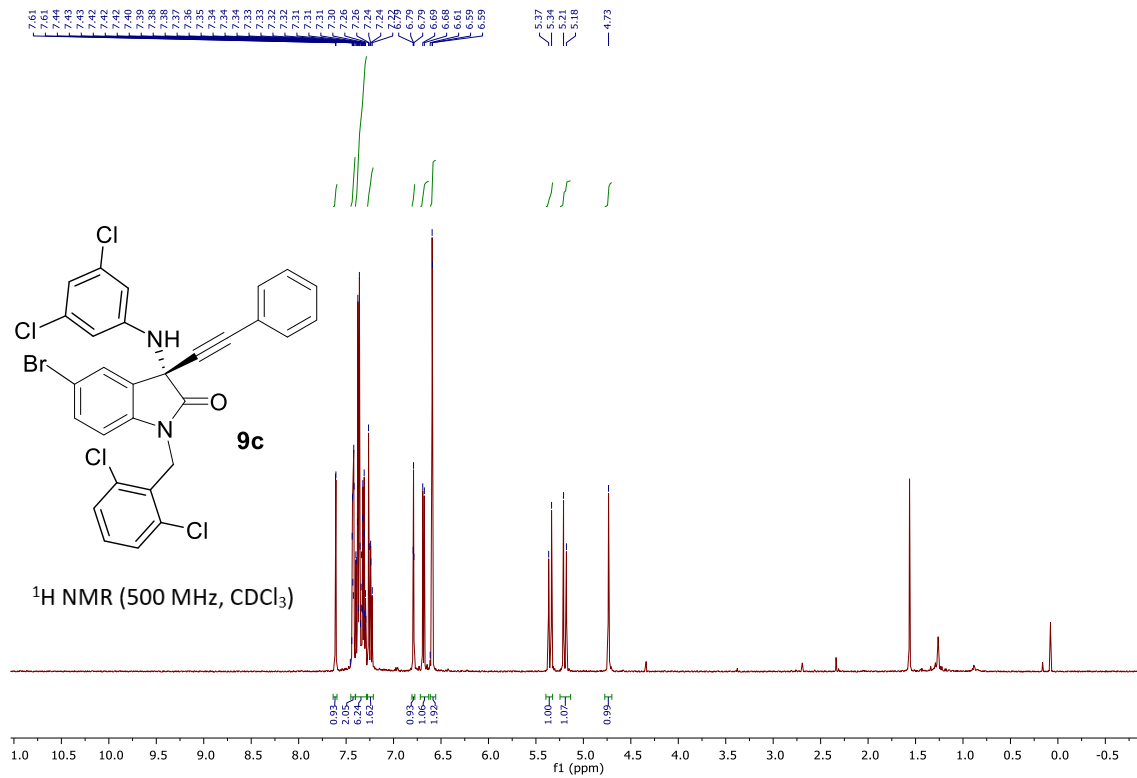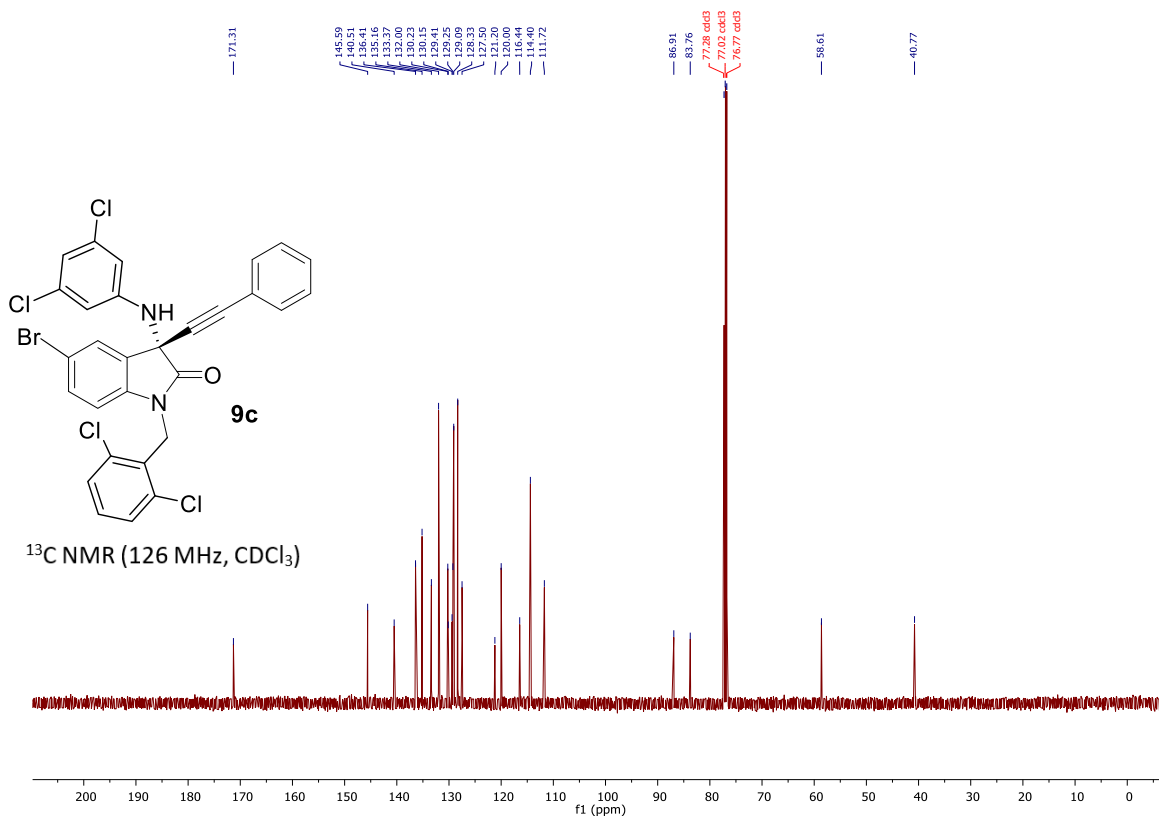

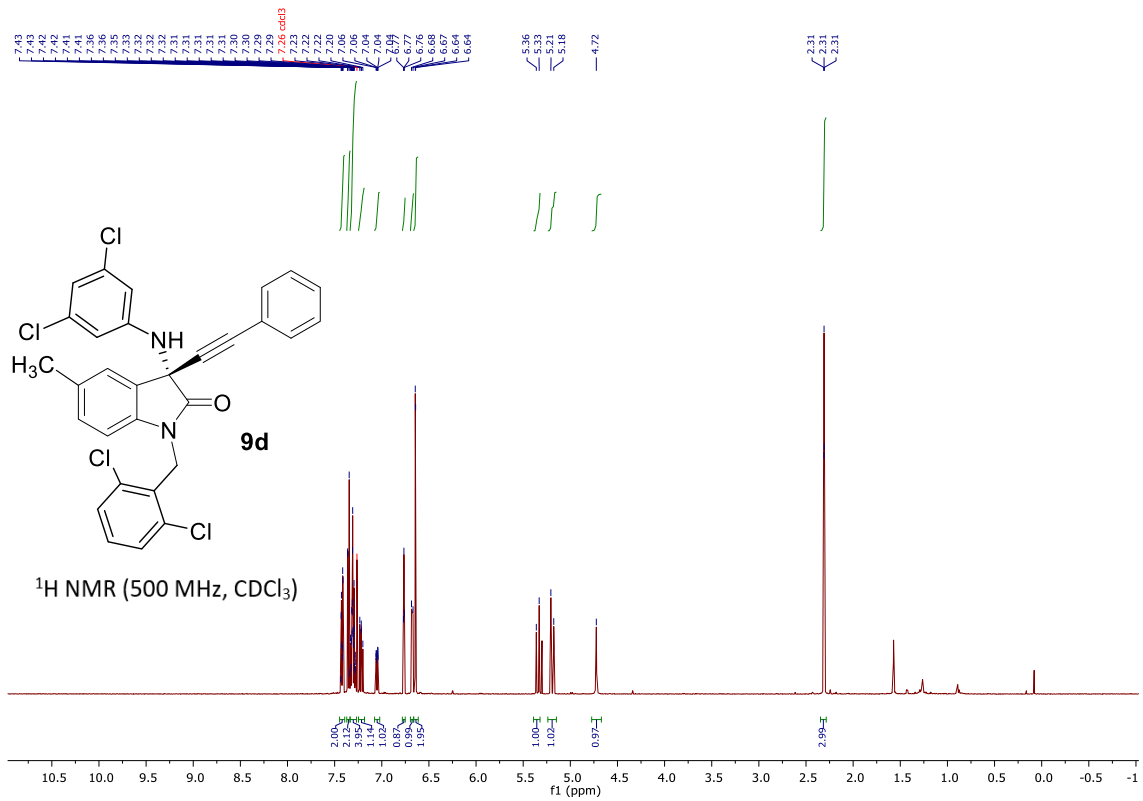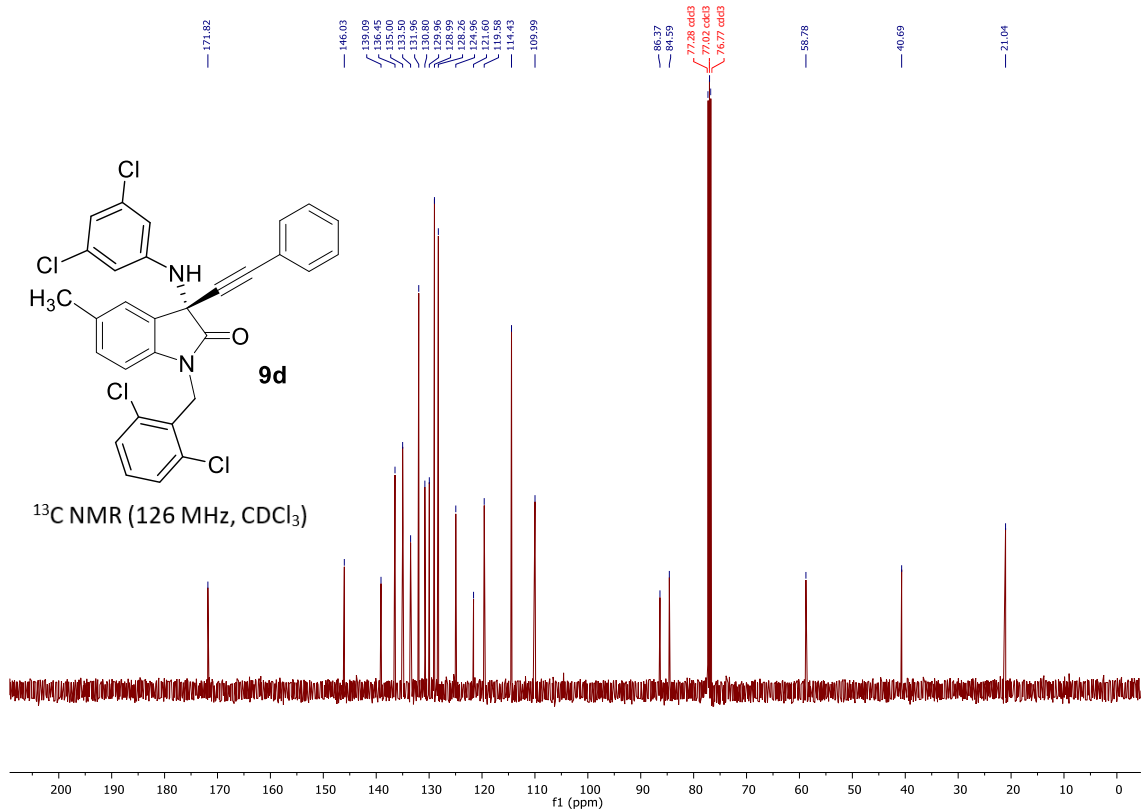

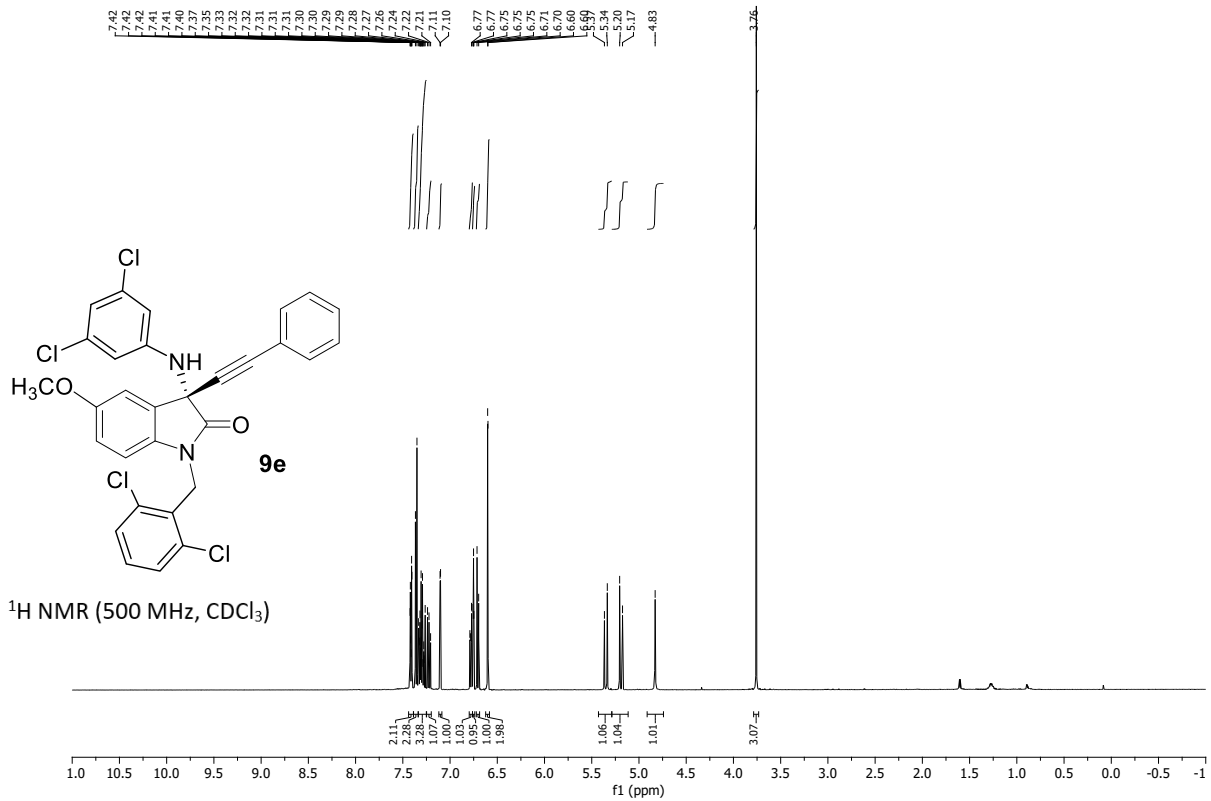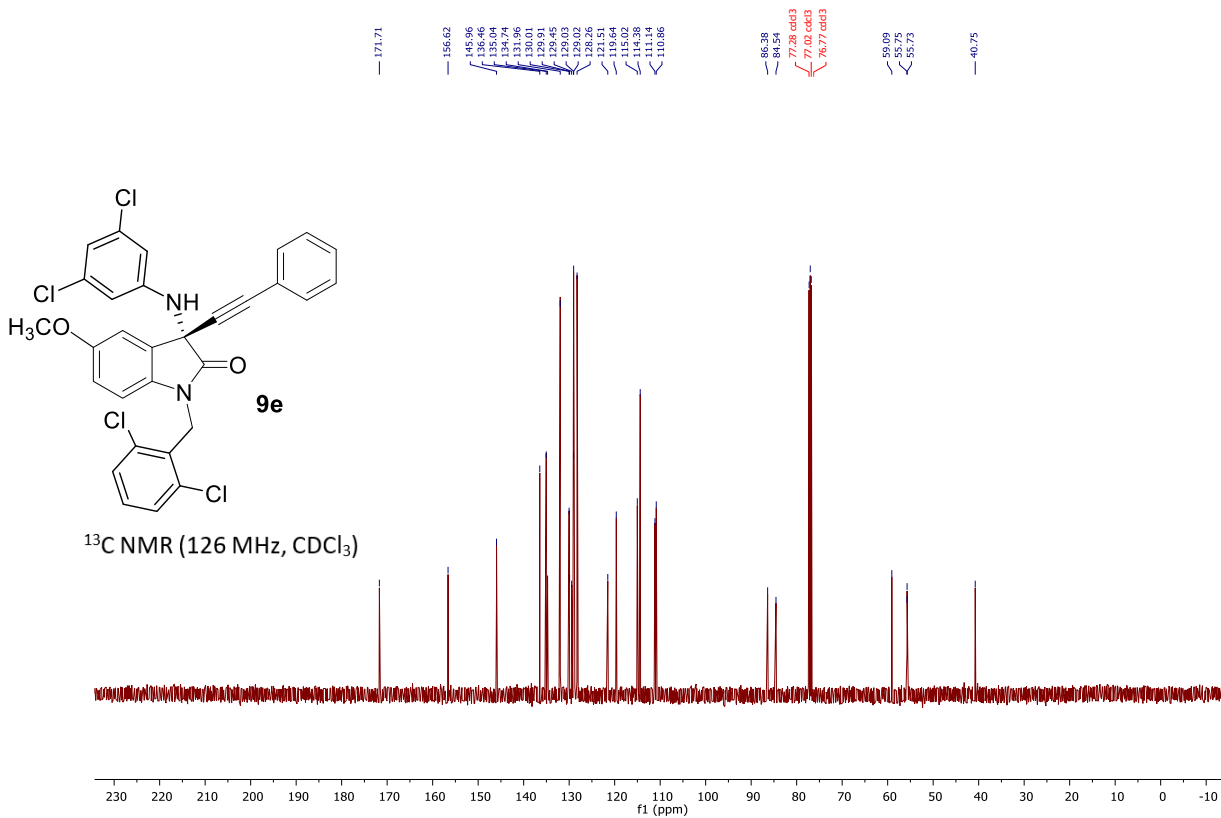

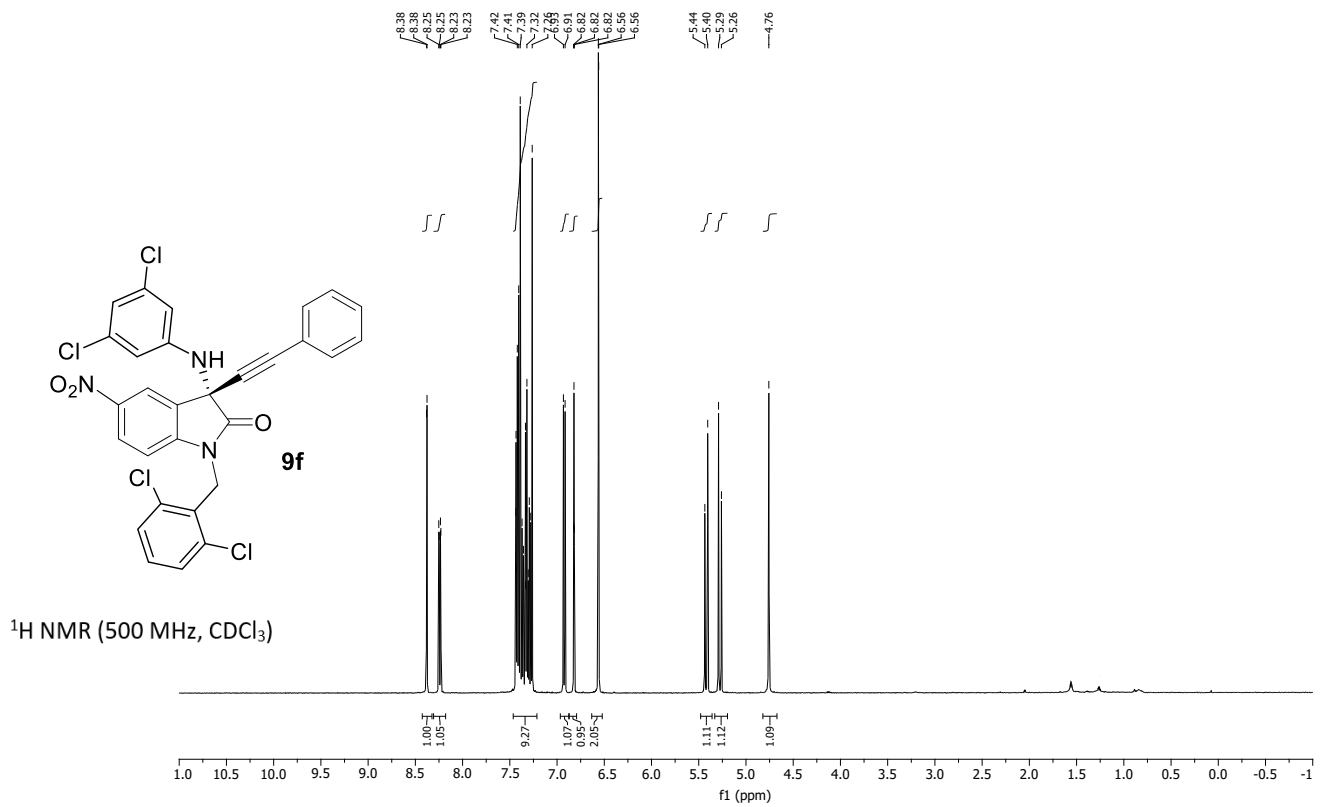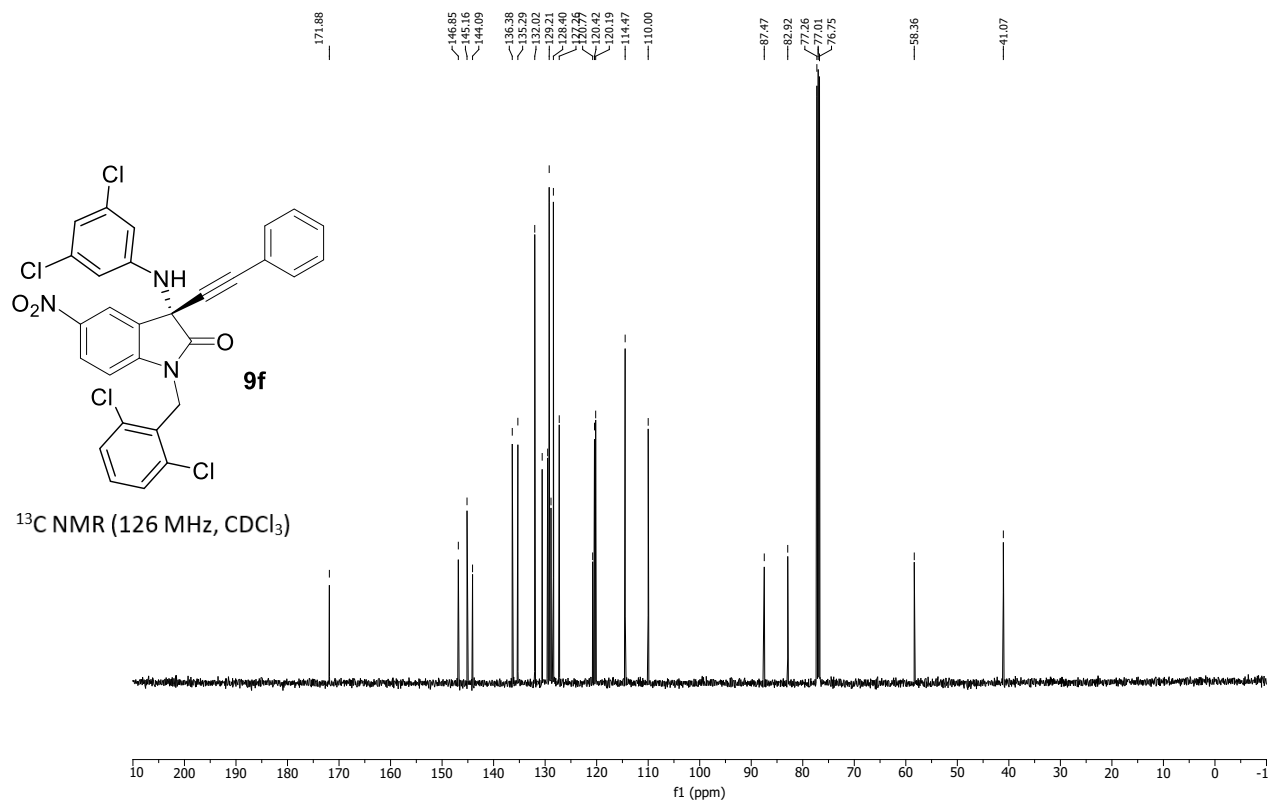



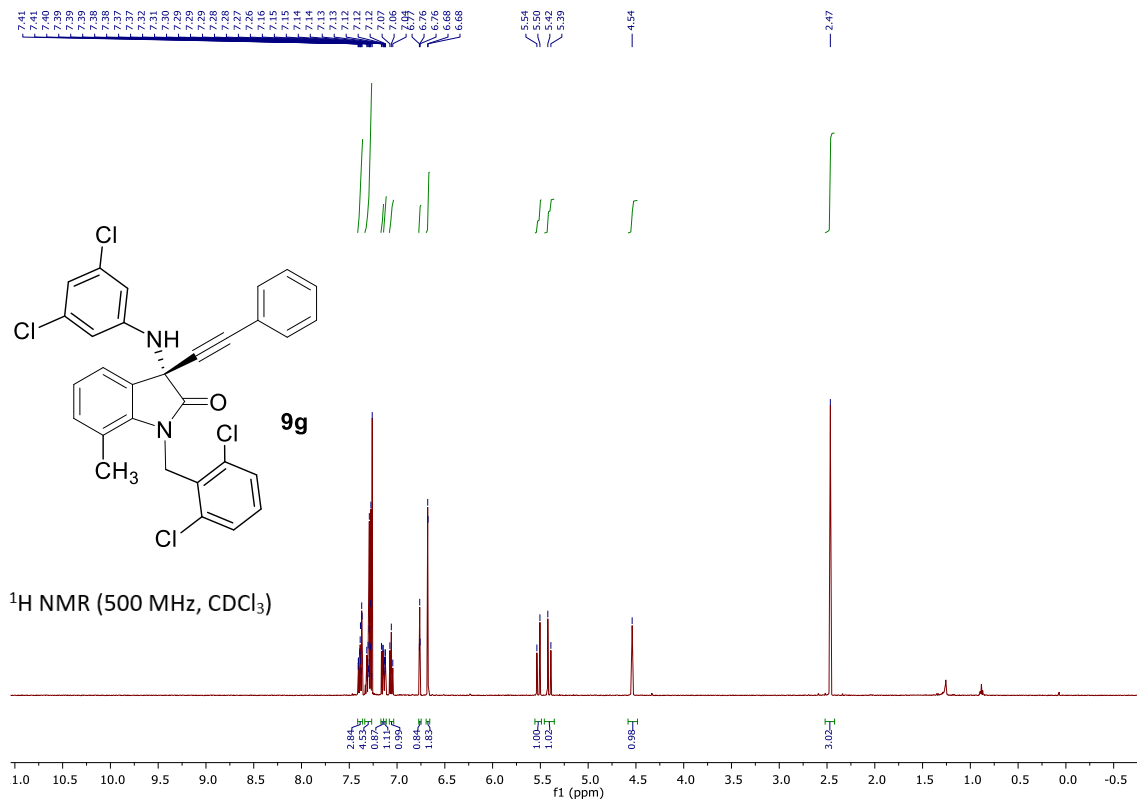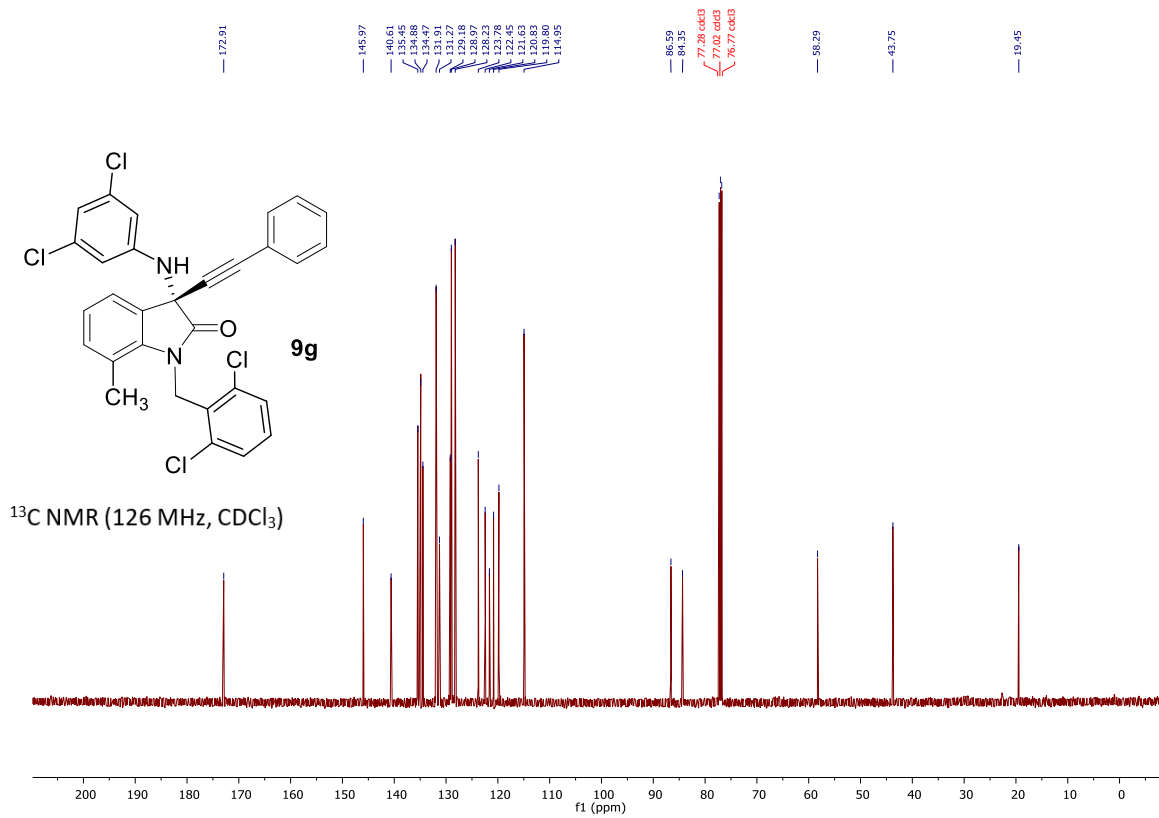

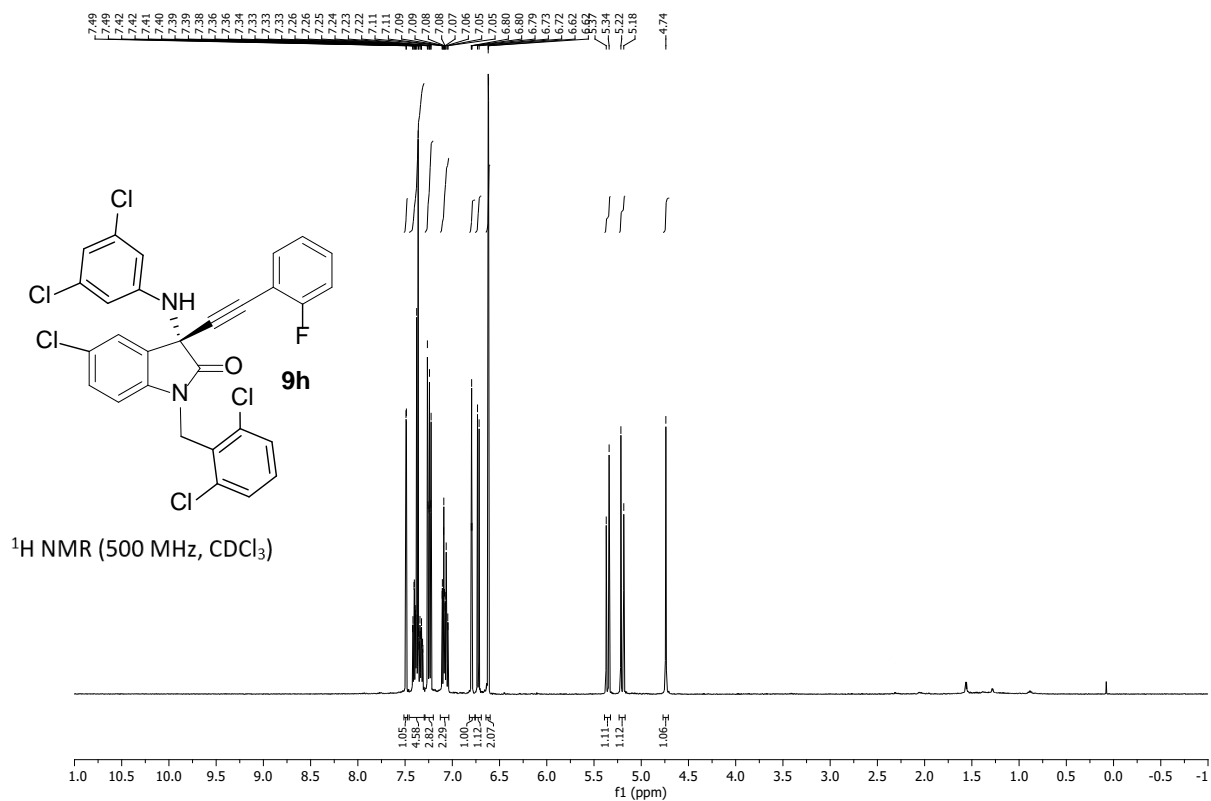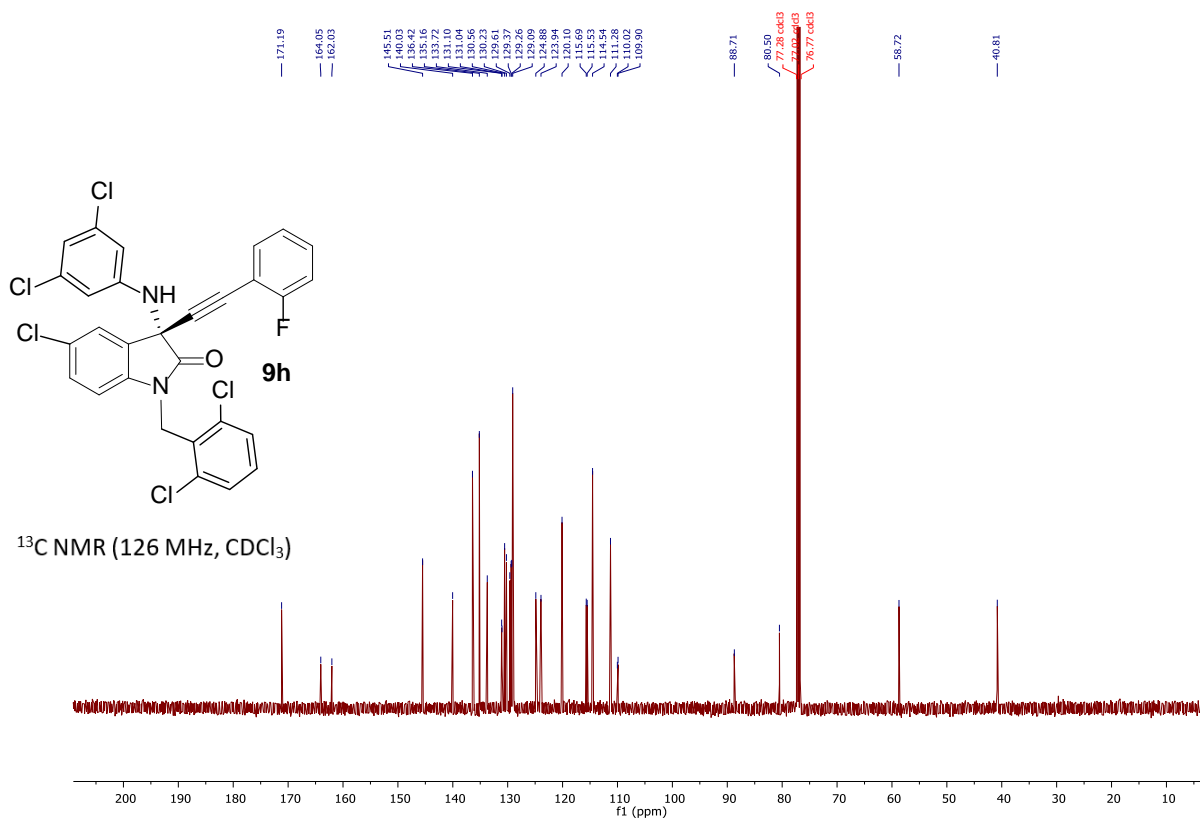

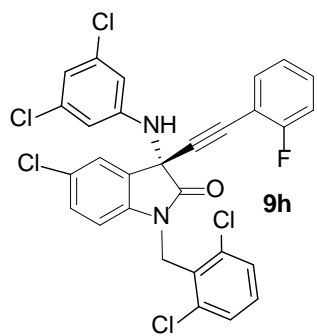

<sup>19</sup>F NMR (470 MHz, CDCl<sub>3</sub>)

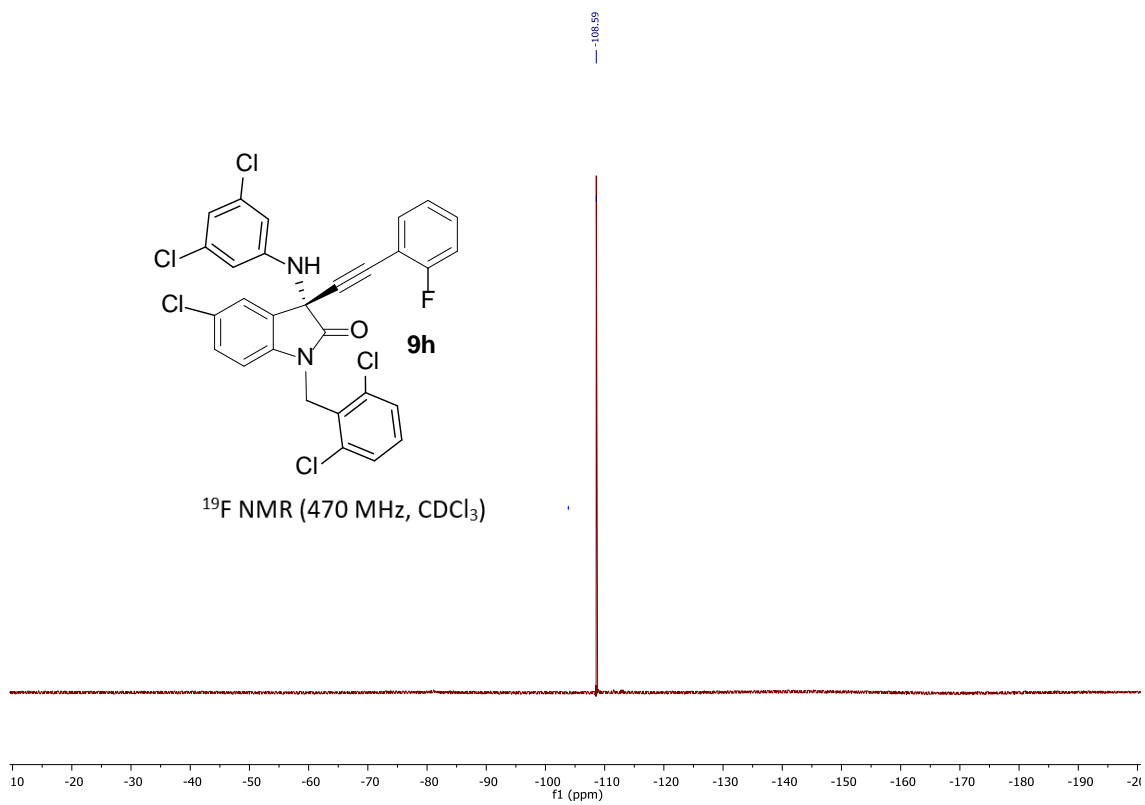

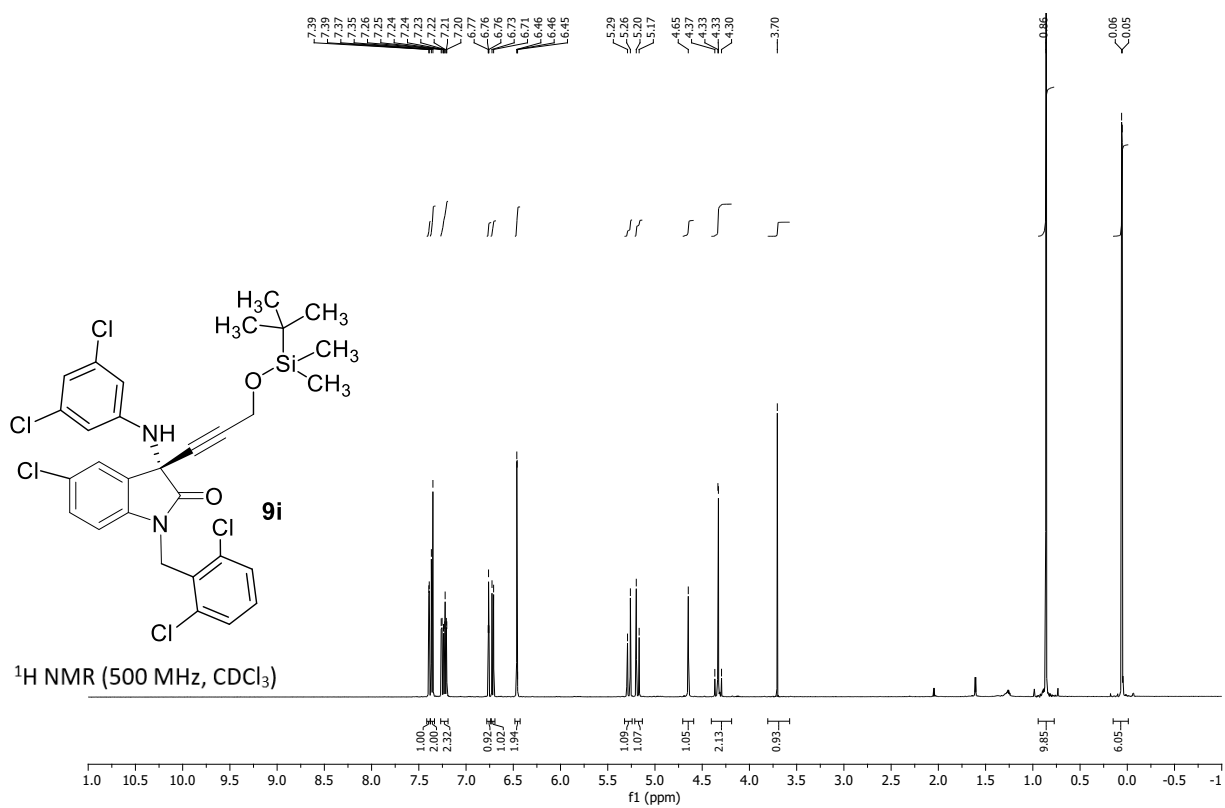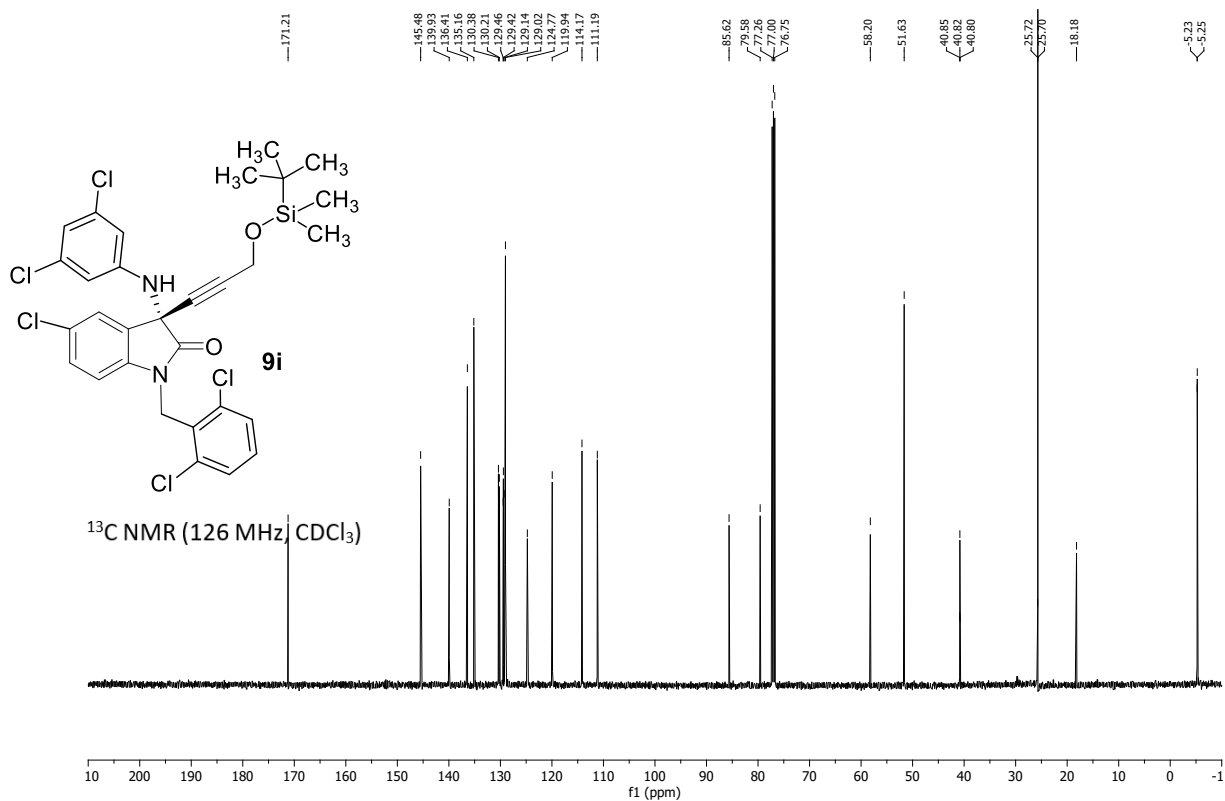

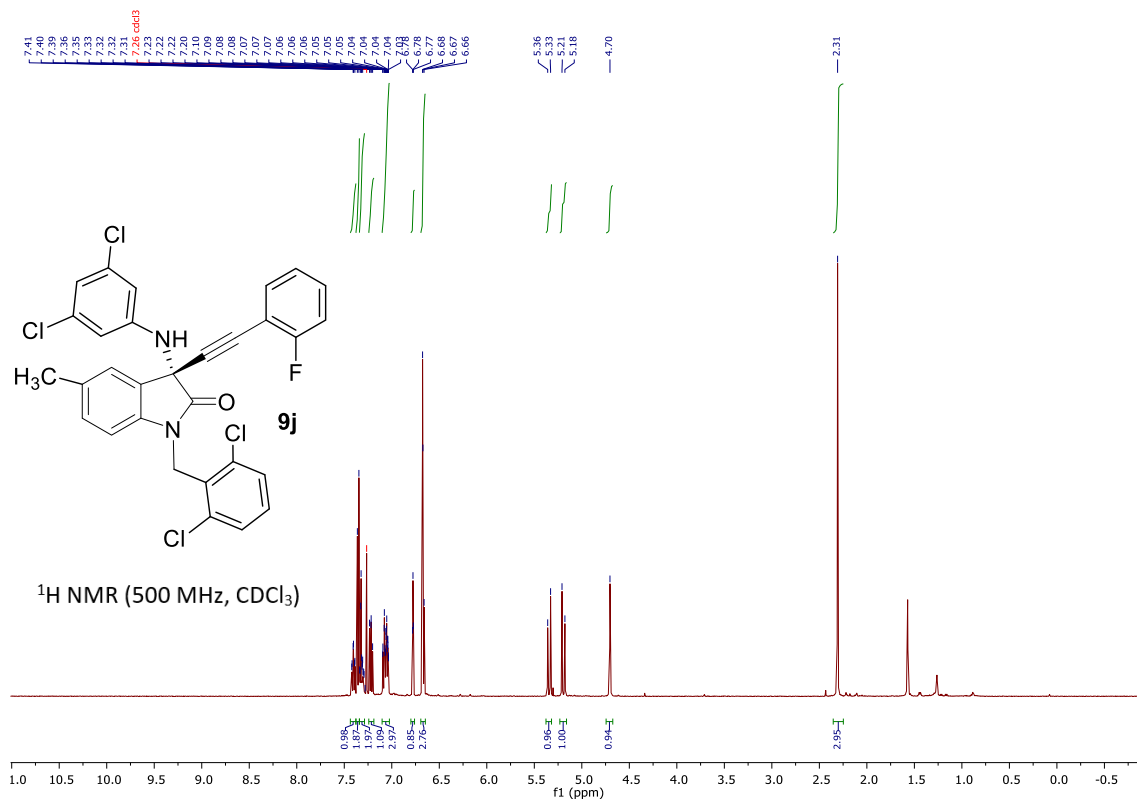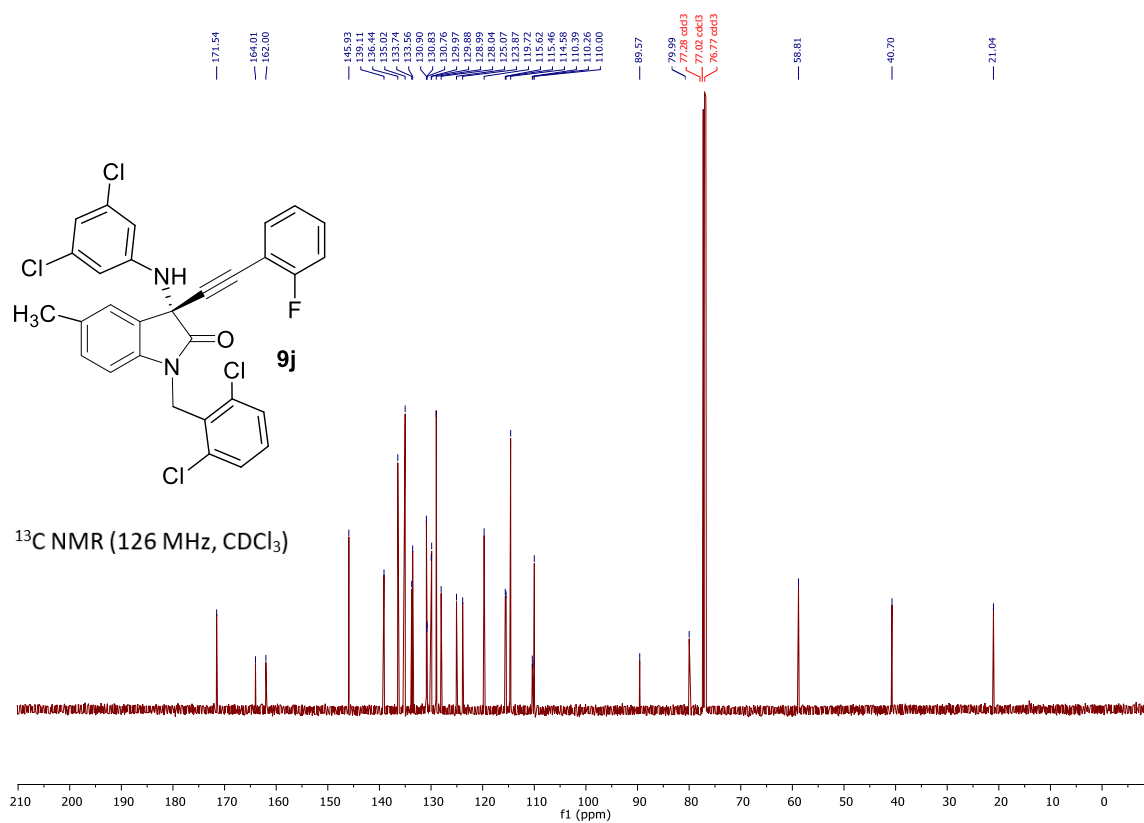

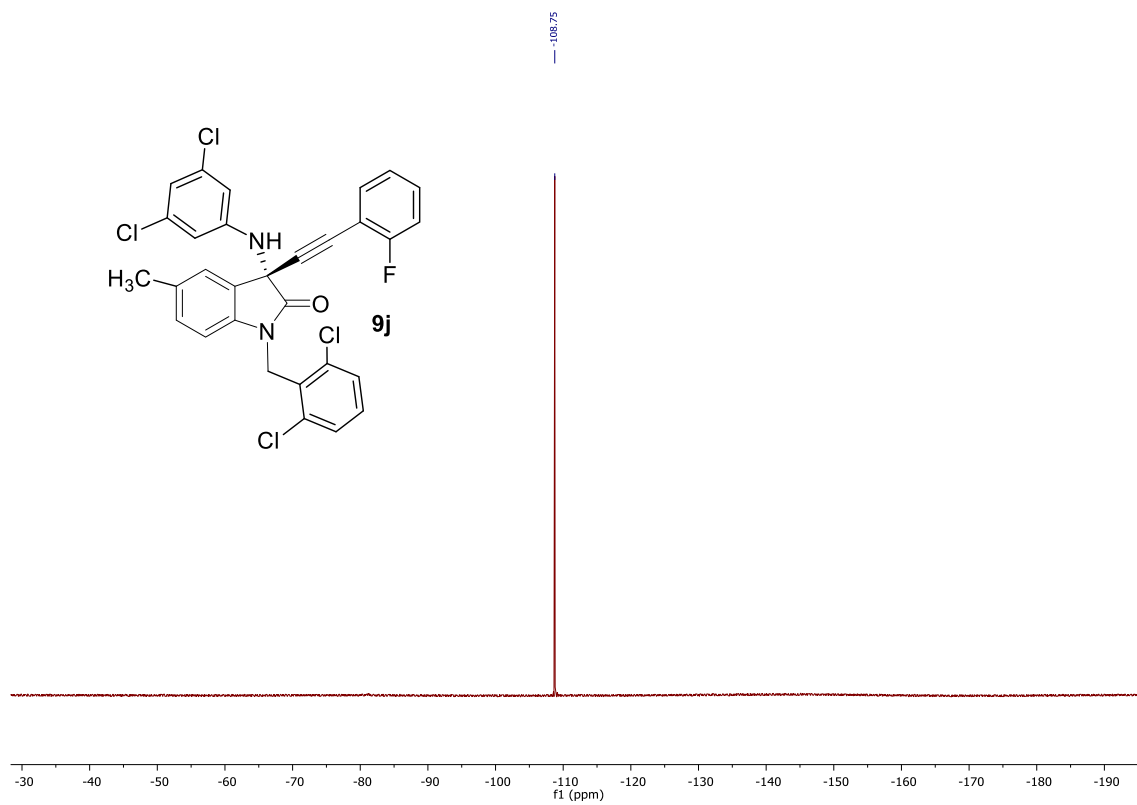

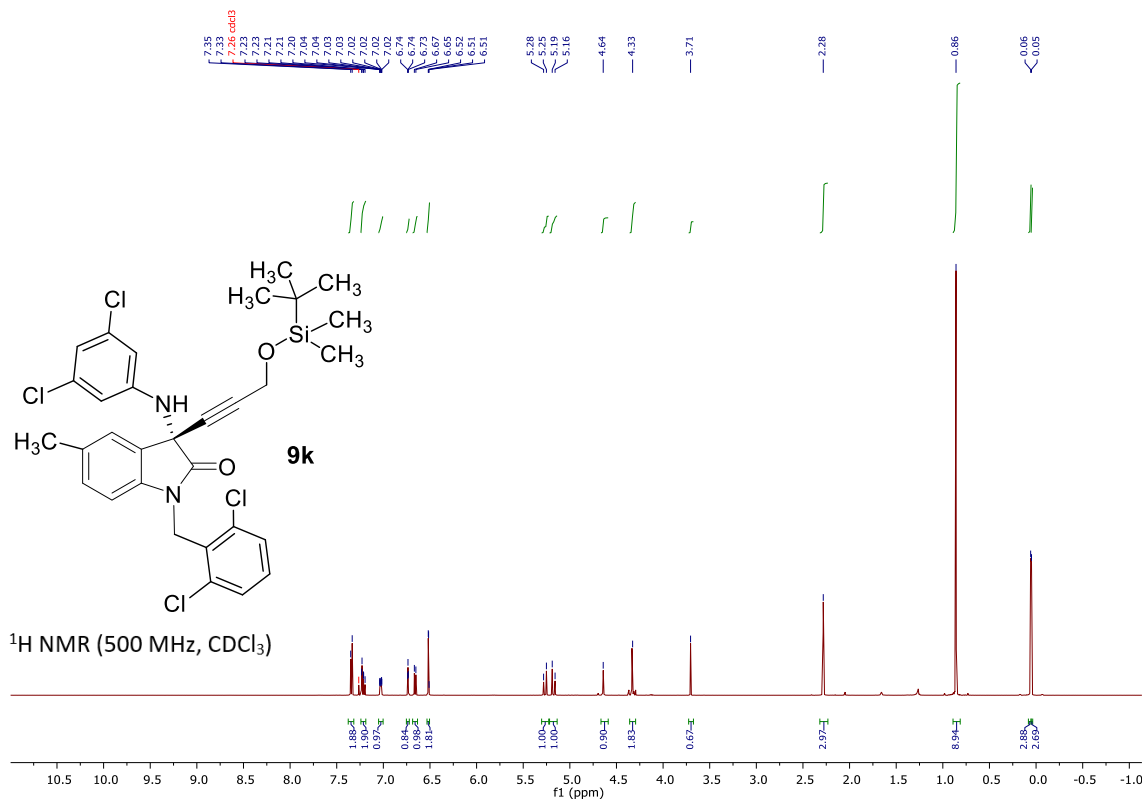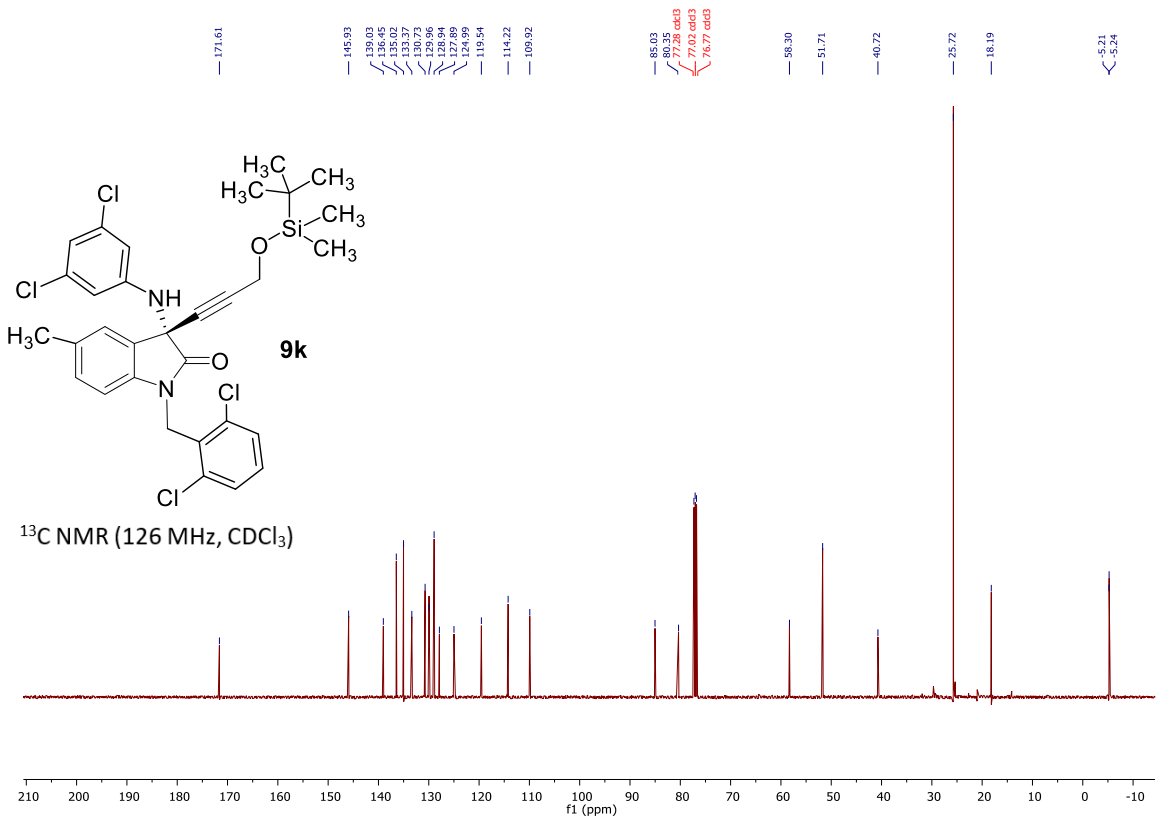

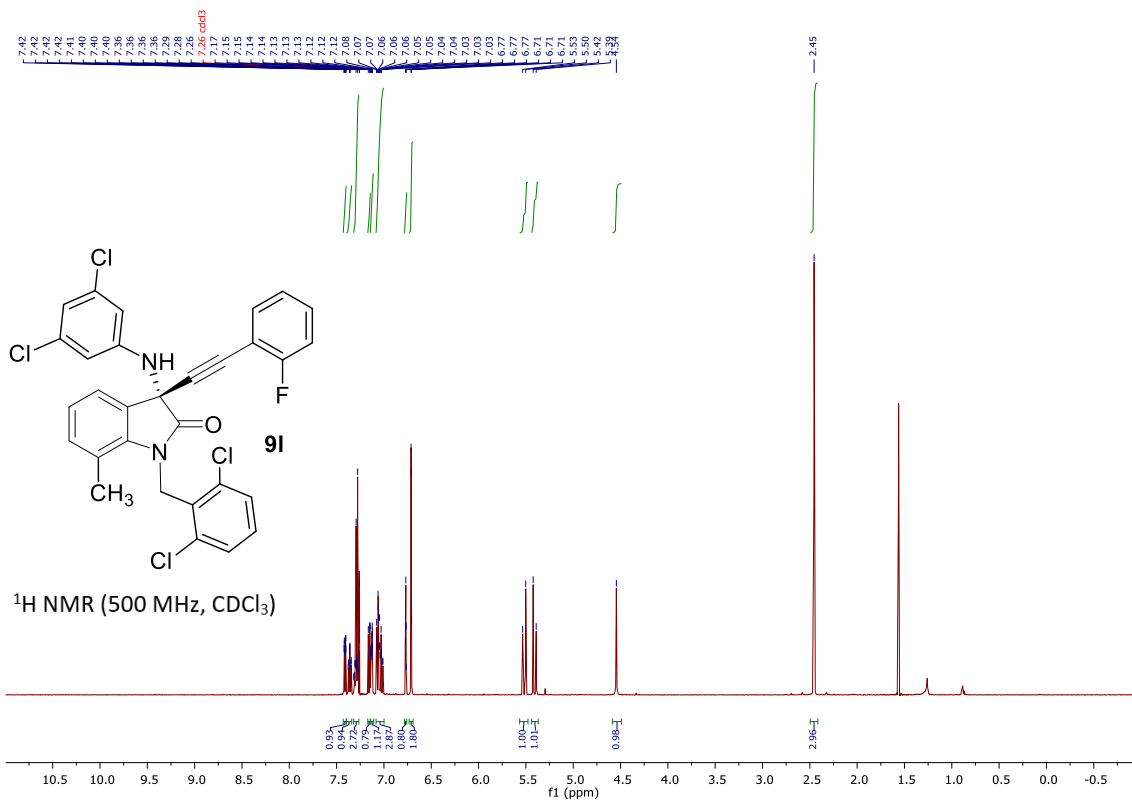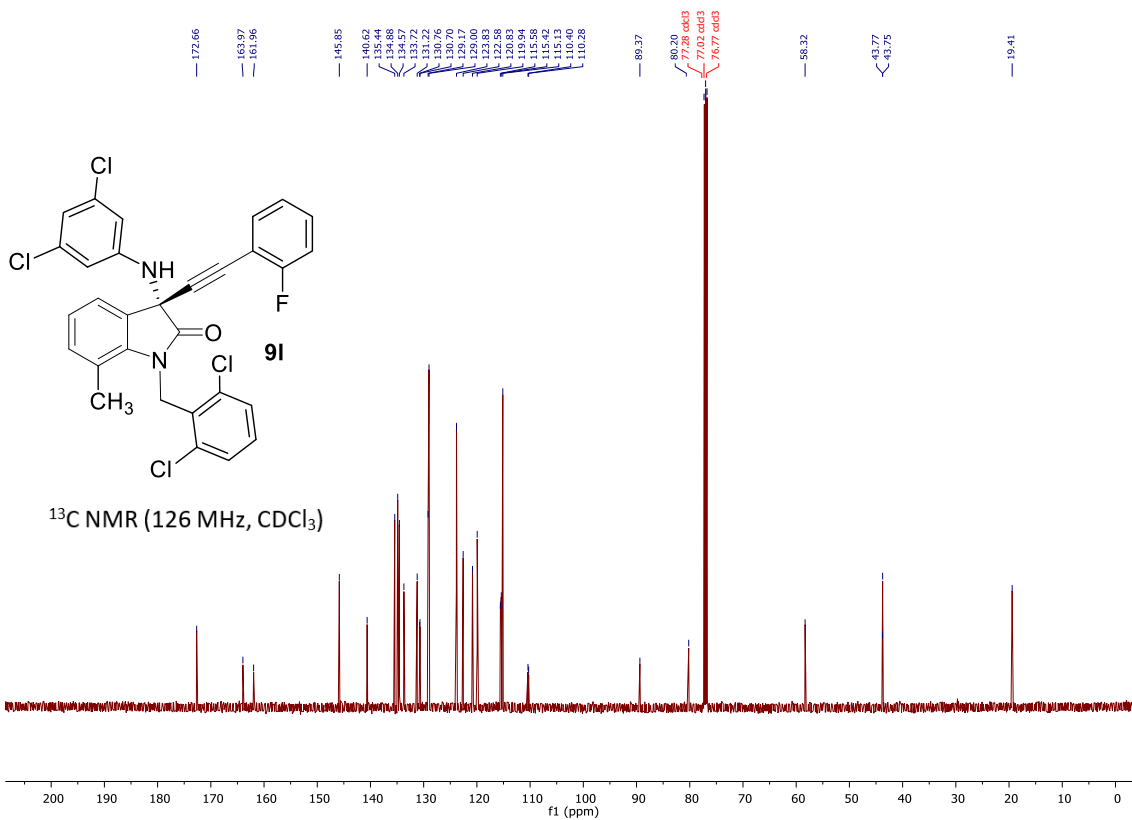



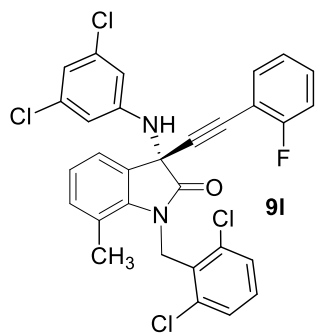

$^{19}\text{F}$  NMR (470 MHz,  $\text{CDCl}_3$ )

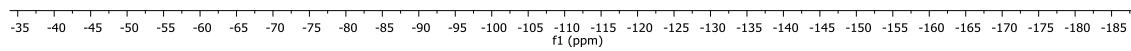

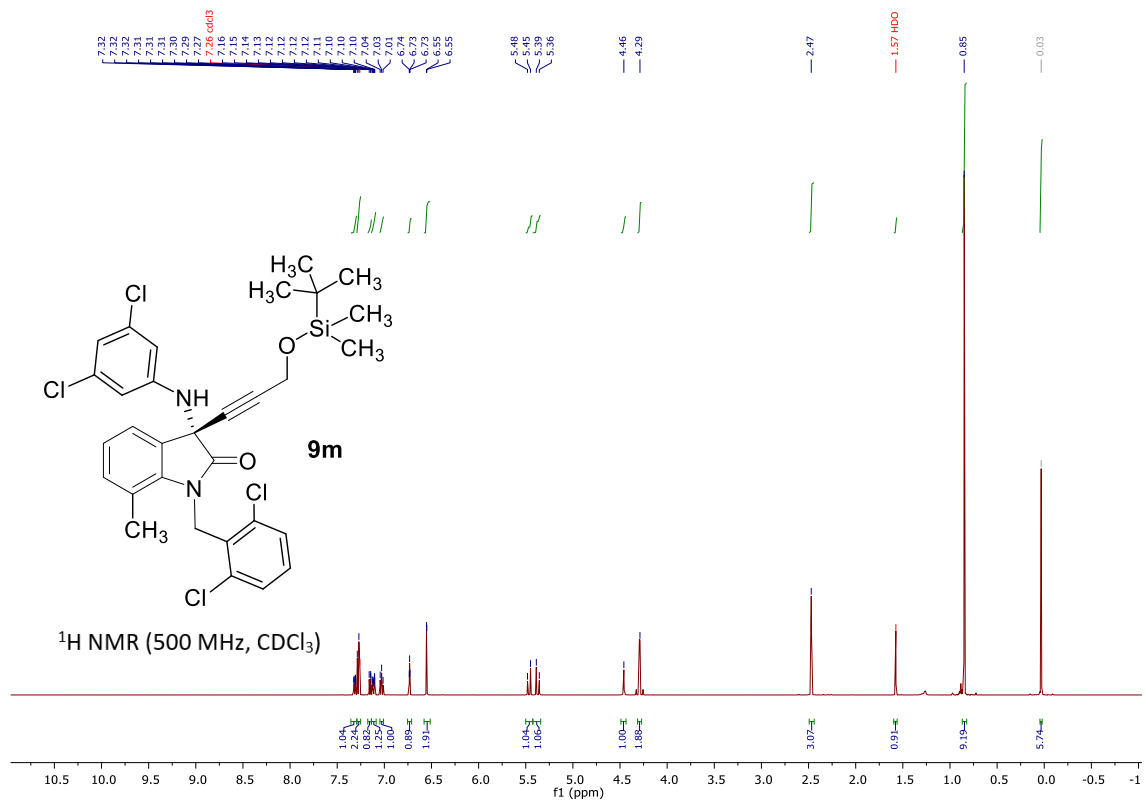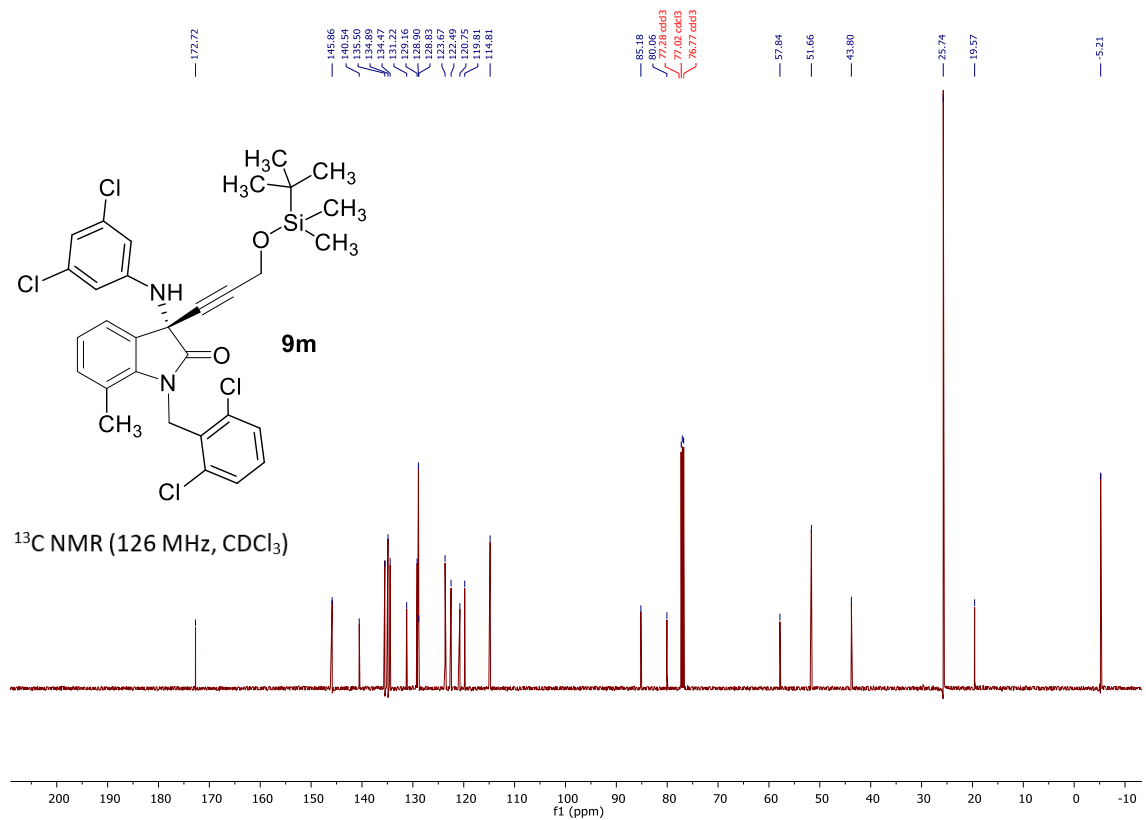

## 7. HPLC Data.

### (*R*)-3-hydroxy-1-methyl-3-(phenylethynyl)indolin-2-one (2a).

Chiralpak AS-H, hexane:isopropanol = 95:5, 1 ml min<sup>-1</sup>,  $\lambda$  = 254 nm:  $t_R$  (major) = 23.1 min,  $t_R$  (minor) = 29.5 min.

Racemic sample

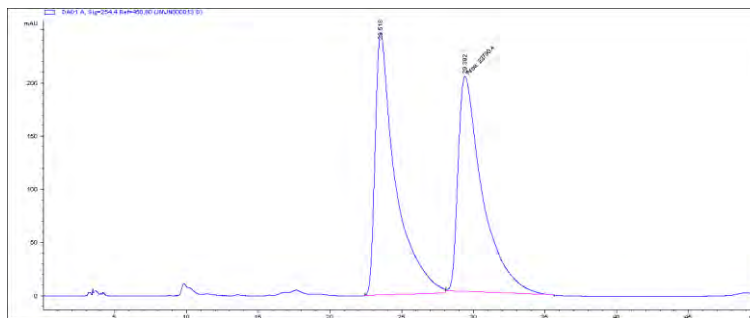

| # | Time   | Area    | Height | Width  | Area%  | Symmetry |
|---|--------|---------|--------|--------|--------|----------|
| 1 | 23.518 | 24449.1 | 246.5  | 1.317  | 50.683 | 0.345    |
| 2 | 29.392 | 23790.4 | 202.2  | 1.9613 | 49.317 | 0.38     |

Enantioselective reaction, er = 91:9

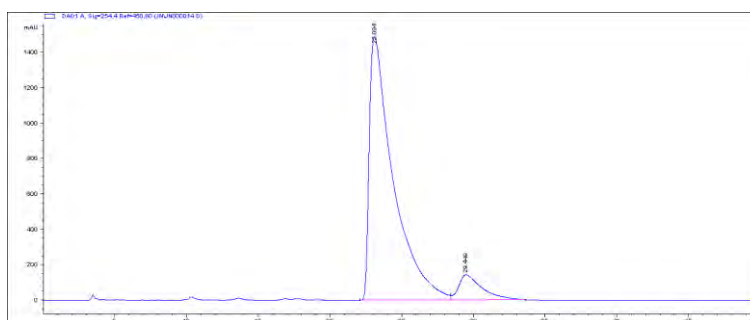

| # | Time   | Area     | Height | Width  | Area%  | Symmetry |
|---|--------|----------|--------|--------|--------|----------|
| 1 | 23.094 | 172895.1 | 1488.9 | 1.3708 | 91.450 | 0.272    |
| 2 | 29.449 | 16163.7  | 142.7  | 1.3727 | 8.550  | 0.42     |

**(R)-1-benzyl-3-hydroxy-3-(phenylethynyl)indolin-2-one (2b).**

Chiralpak AD-H, hexane:isopropanol = 70:30, 1 mL min<sup>-1</sup>, λ = 254 nm: t<sub>R</sub> (major) = 10.9 min, t<sub>R</sub> (minor) = 15.2 min.

Racemic sample

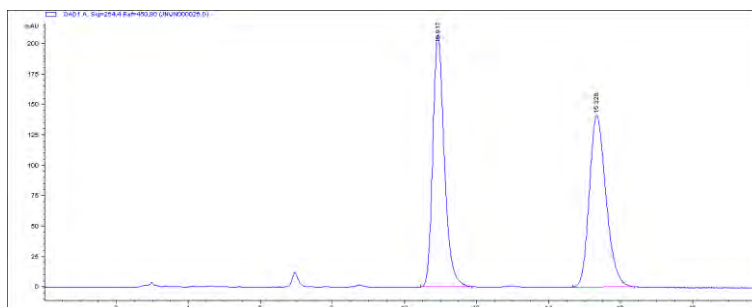

| # | Time   | Area   | Height | Width  | Area%  | Symmetry |
|---|--------|--------|--------|--------|--------|----------|
| 1 | 10.917 | 4616.6 | 207.4  | 0.3397 | 50.370 | 0.729    |
| 2 | 15.326 | 4548.8 | 141.1  | 0.4881 | 49.630 | 0.748    |

Enantioselective reaction, er = 92:8

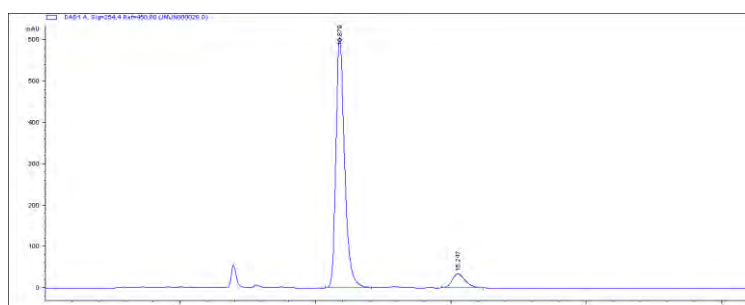

| # | Time   | Area    | Height | Width  | Area%  | Symmetry |
|---|--------|---------|--------|--------|--------|----------|
| 1 | 10.879 | 13522.2 | 605.7  | 0.3373 | 92.180 | 0.698    |
| 2 | 15.247 | 1147.1  | 34.2   | 0.4905 | 7.820  | 0.733    |

**(R)-1-(2,6-dichlorobenzyl)-3-hydroxy-3-(phenylethynyl)indolin-2-one (2c).**

Chiralpak AD-H, hexane:isopropanol = 70:30, 1 mL min<sup>-1</sup>, λ = 254 nm: t<sub>R</sub> (major) = 12.1 min, t<sub>R</sub> (minor) = 15.1 min.

Racemic sample

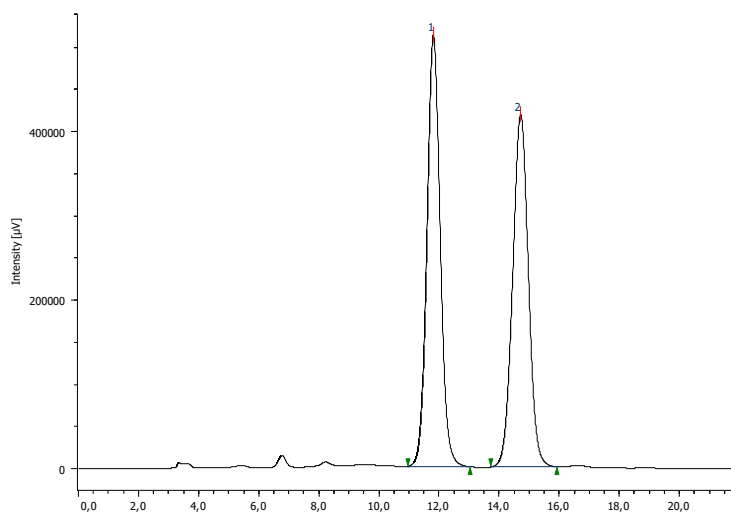

| # | t <sub>R</sub> | Area     | Height | Area%  | Height% | Symmetry Factor |
|---|----------------|----------|--------|--------|---------|-----------------|
| 1 | 11,800         | 15693724 | 511060 | 50,777 | 55,037  | 1,054           |
| 2 | 14,700         | 15213682 | 417523 | 49,223 | 44,963  | 0,999           |

Enantioselective reaction, er = 96:4

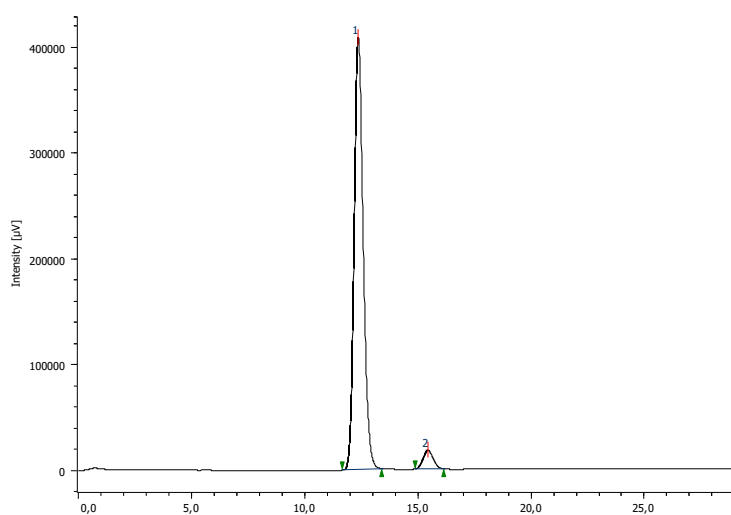

| # | t <sub>R</sub> | Area     | Height | Area%  | Height% | Symmetry Factor |
|---|----------------|----------|--------|--------|---------|-----------------|
| 1 | 12,092         | 19263764 | 711684 | 96,346 | 96,780  | 1,190           |
| 2 | 15,100         | 730634   | 23678  | 3,654  | 3,220   | 1,108           |

**(R)-3-hydroxy-3-(phenylethynyl)-1-tritylindolin-2-one (2d).**

Chiralpak AD-H, hexane:isopropanol = 70:30 , 1 mL min<sup>-1</sup>,  $\lambda$  = 254 nm: t<sub>R</sub> (major) = 5.4 min, t<sub>R</sub> (minor) = 17.1 min.

Racemic sample

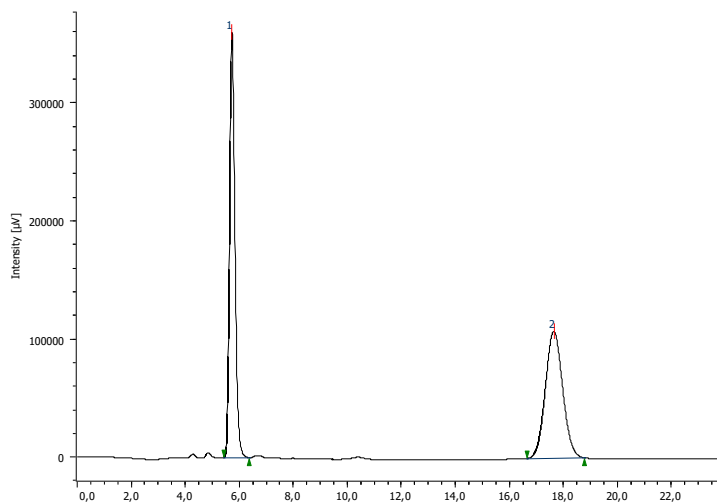

| # | t <sub>R</sub> | Area    | Height | Area%  | Height% | Symmetry Factor |
|---|----------------|---------|--------|--------|---------|-----------------|
| 1 | 5,725          | 4995101 | 359429 | 50,963 | 77,021  | 1,200           |
| 2 | 17,625         | 4806365 | 107235 | 49,037 | 22,979  | 1,059           |

Enantioselective reaction, er = 92:8

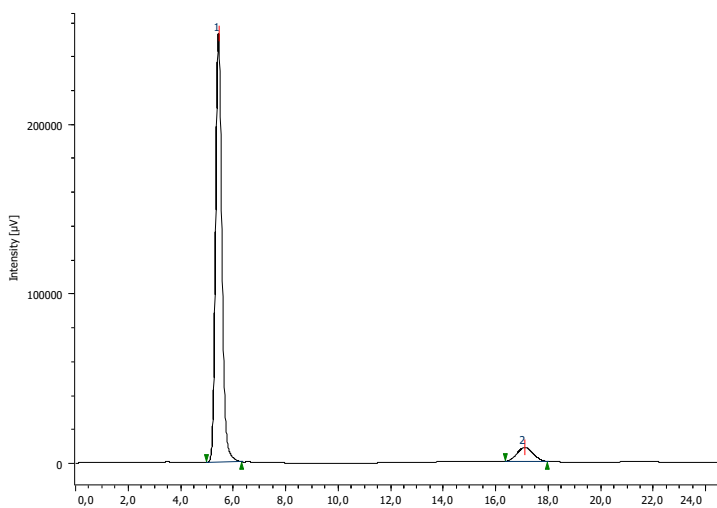

| # | t <sub>R</sub> | Area    | Height | Area%  | Height% | Symmetry Factor |
|---|----------------|---------|--------|--------|---------|-----------------|
| 1 | 5,442          | 4169408 | 252007 | 92,334 | 96,892  | 1,156           |
| 2 | 17,092         | 346181  | 8083   | 7,666  | 3,108   | 1,062           |

**(R)-1-acetyl-3-hydroxy-3-(phenylethynyl)indolin-2-one (2e).**

Chiralpak AS-H, hexane:isopropanol = 90:10 , 1 mL min<sup>-1</sup>,  $\lambda$  = 254 nm: t<sub>R</sub> (major) = 10.2 min, t<sub>R</sub> (minor) = 13.1 min.

Racemic sample

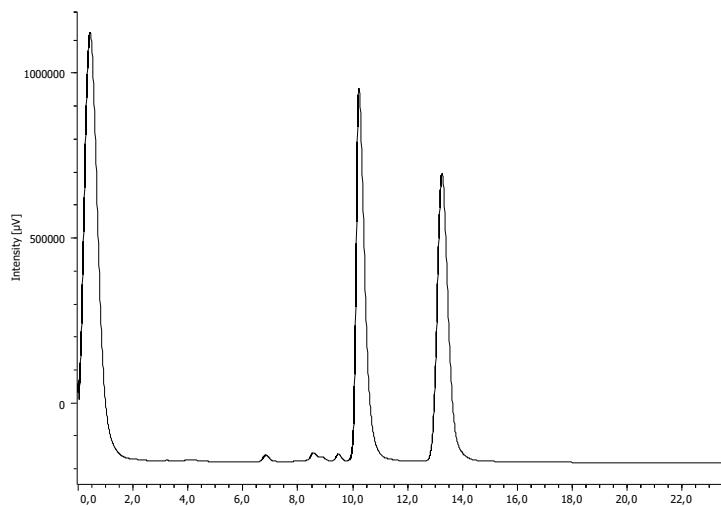

| # | t <sub>R</sub> | Area     | Height  | Area%  | Height% | Symmetry Factor |
|---|----------------|----------|---------|--------|---------|-----------------|
| 1 | 10,217         | 24943107 | 1127694 | 50,316 | 56,462  | 1,782           |
| 2 | 13,233         | 24629997 | 869555  | 49,684 | 43,538  | 1,305           |

Enantioselective reaction, er = 93:7

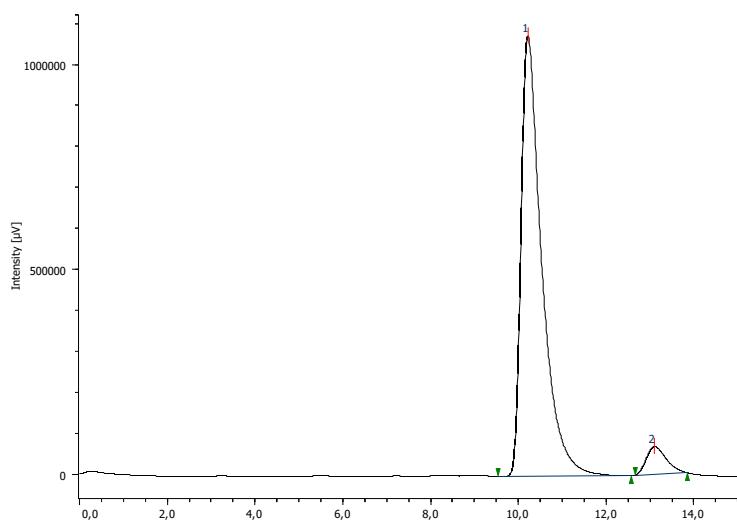

| # | t <sub>R</sub> | Area     | Height  | Area%  | Height% | Symmetry Factor |
|---|----------------|----------|---------|--------|---------|-----------------|
| 1 | 10,208         | 32827354 | 1072682 | 93,290 | 94,116  | 1,920           |
| 2 | 13,092         | 2361148  | 67062   | 6,710  | 5,884   | 1,344           |

**(R)-3-hydroxy-3-(phenylethynyl)-1-tosylindolin-2-one (2f).**

Chiralpak AD-H, hexane:isopropanol = 70:30 , 1 mL min<sup>-1</sup>,  $\lambda$  = 254 nm: t<sub>R</sub> (major) = 12.2 min, t<sub>R</sub> (minor) = 22.2 min.

Racemic sample

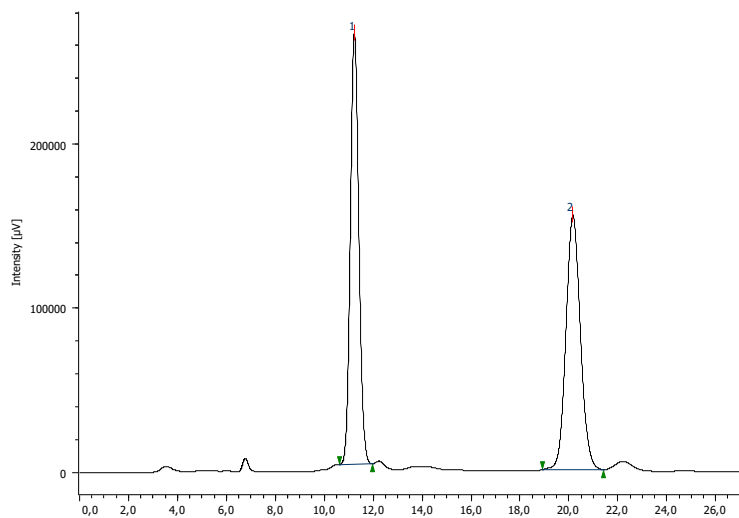

| # | t <sub>R</sub> | Area    | Height | Area%  | Height% | Symmetry Factor |
|---|----------------|---------|--------|--------|---------|-----------------|
| 1 | 11,217         | 6321805 | 262109 | 49,960 | 62,888  | 1,091           |
| 2 | 20,133         | 6331906 | 154679 | 50,040 | 37,112  | 1,092           |

Enantioselective reaction, er = 83:17

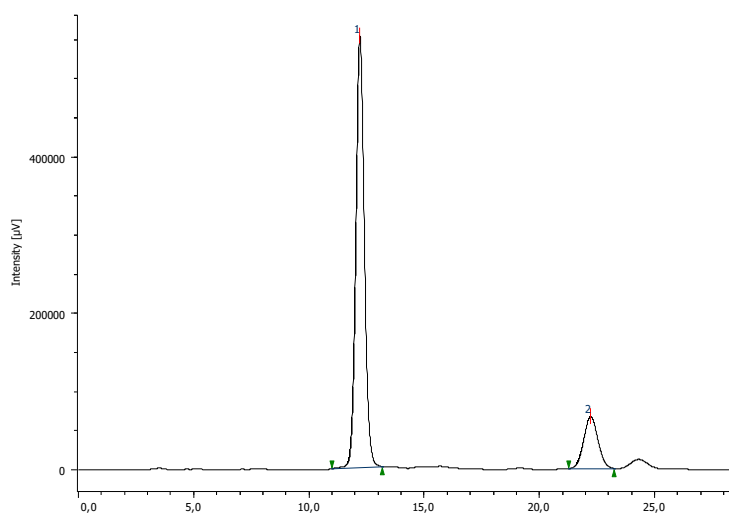

| # | t <sub>R</sub> | Area     | Height | Area%  | Height% | Symmetry Factor |
|---|----------------|----------|--------|--------|---------|-----------------|
| 1 | 12,200         | 14179231 | 550338 | 83,158 | 89,251  | 1,068           |
| 2 | 22,192         | 2871699  | 66283  | 16,842 | 10,749  | 1,053           |



**(R)-1-(2,6-dichlorobenzyl)-3-hydroxy-3-((4-methoxyphenyl)ethynyl)indolin-2-one (3a).**

Chiralpak AD-H, hexane:isopropanol = 70:30, 1 mL min<sup>-1</sup>,  $\lambda$  = 254 nm:  $t_R$  (major) = 13.5 min,  $t_R$  (minor) = 19.1 min.

Racemic sample

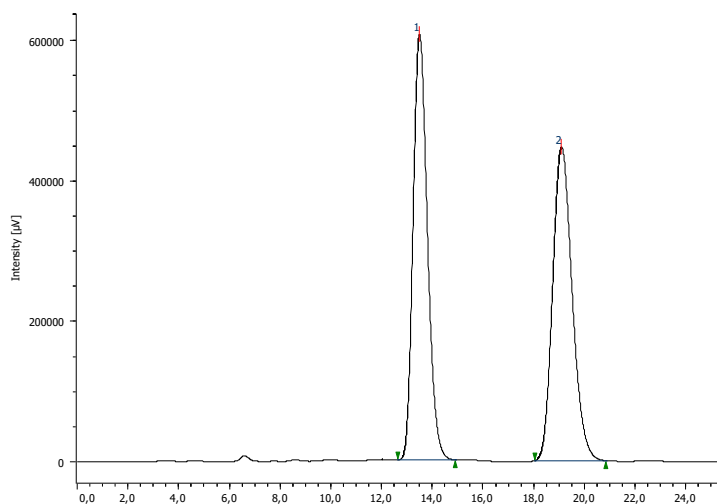

| # | $t_R$  | Area     | Height | Area%  | Height% | Symmetry Factor |
|---|--------|----------|--------|--------|---------|-----------------|
| 1 | 13,483 | 23678390 | 604613 | 49,978 | 57,566  | 1,208           |
| 2 | 19,075 | 23699418 | 445680 | 50,022 | 42,434  | 1,189           |

Enantioselective reaction, er = 99:1

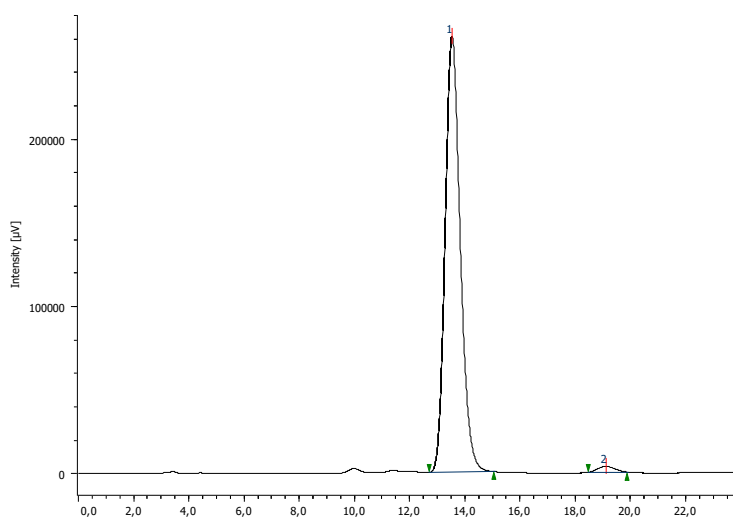

| # | $t_R$  | Area    | Height | Area%  | Height% | Symmetry Factor |
|---|--------|---------|--------|--------|---------|-----------------|
| 1 | 13,517 | 9862943 | 260309 | 98,530 | 98,708  | 1,206           |
| 2 | 19,092 | 147196  | 3407   | 1,470  | 1,292   | 1,078           |

**(R)-1-(2,6-dichlorobenzyl)-3-hydroxy-3-(p-tolyethynyl)indolin-2-one (3b).**

Chiralpak AD-H, hexane:isopropanol = 70:30, 1 mL min<sup>-1</sup>, λ = 254 nm: t<sub>R</sub> (major) = 12.3 min, t<sub>R</sub> (minor) = 18.1 min.

Racemic sample

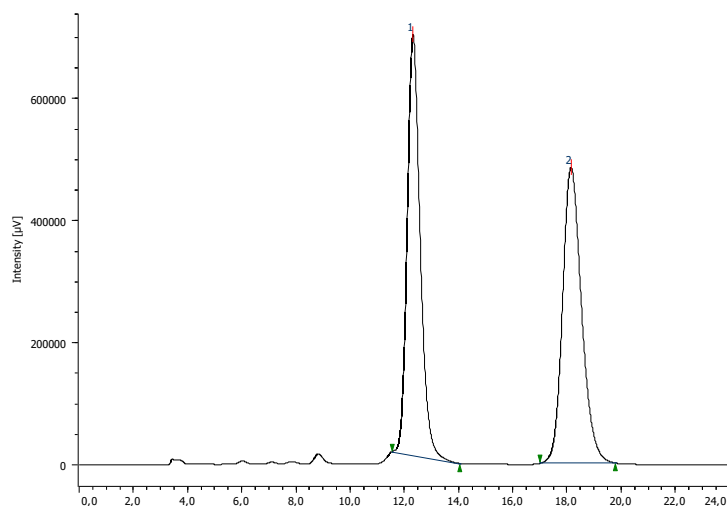

| # | t <sub>R</sub> | Area     | Height | Area%  | Height% | Symmetry Factor |
|---|----------------|----------|--------|--------|---------|-----------------|
| 1 | 12,300         | 22909432 | 687970 | 49,303 | 58,721  | 1,244           |
| 2 | 18,133         | 23556727 | 483621 | 50,697 | 41,279  | 1,195           |

Enantioselective reaction, er = 98:2

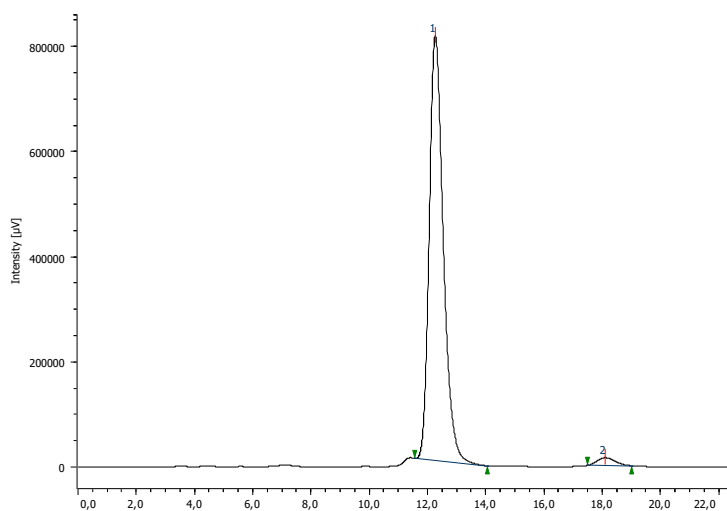

| # | t <sub>R</sub> | Area     | Height | Area%  | Height% | Symmetry Factor |
|---|----------------|----------|--------|--------|---------|-----------------|
| 1 | 12,258         | 27000531 | 807052 | 97,660 | 98,172  | 1,266           |
| 2 | 18,083         | 646918   | 15031  | 2,340  | 1,828   | 1,193           |

**(R)-3-((4-bromophenyl)ethynyl)-1-(2,6-dichlorobenzyl)-3-hydroxyindolin-2-one (3c).**

Chiralpak AD-H, hexane:isopropanol = 70:30, 1 mL min<sup>-1</sup>, λ = 254 nm: t<sub>R</sub> (major) = 11.5 min, t<sub>R</sub> (minor) = 23.2 min.

Racemic sample

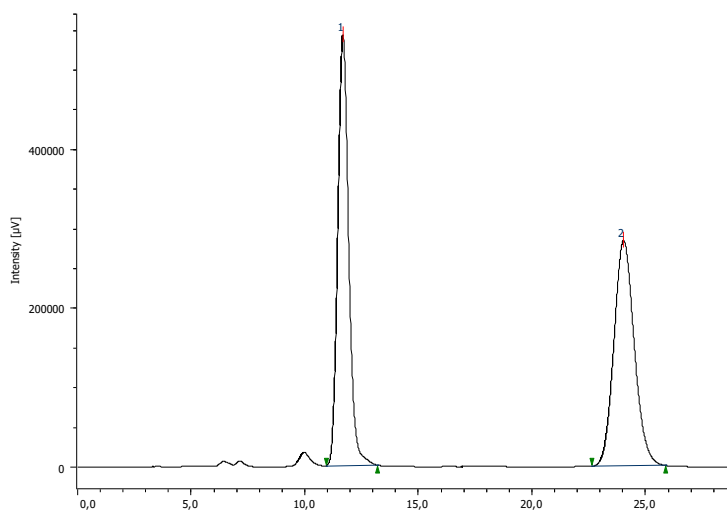

| # | t <sub>R</sub> | Area     | Height | Area%  | Height% | Symmetry Factor |
|---|----------------|----------|--------|--------|---------|-----------------|
| 1 | 11,667         | 17923699 | 541457 | 50,341 | 65,653  | 1,142           |
| 2 | 24,000         | 17681150 | 283264 | 49,659 | 34,347  | 1,121           |

Enantioselective reaction, er = 98:2

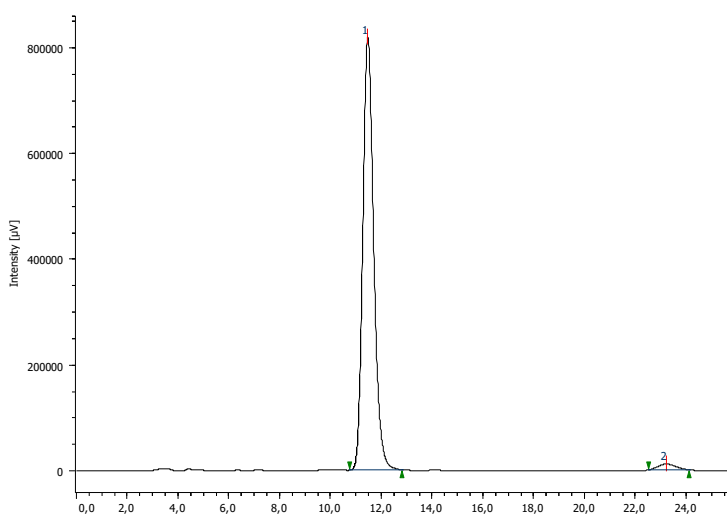

| # | t <sub>R</sub> | Area     | Height | Area%  | Height% | Symmetry Factor |
|---|----------------|----------|--------|--------|---------|-----------------|
| 1 | 11,458         | 24539125 | 817193 | 97,867 | 98,682  | 1,184           |
| 2 | 23,192         | 534912   | 10917  | 2,133  | 1,318   | 1,131           |

**(R)-1-(2,6-dichlorobenzyl)-3-hydroxy-3-((4-(trifluoromethyl)phenyl)ethynyl)indolin-2-one (3d).**

Chiralpak AD-H, hexane:isopropanol = 70:30, 1 mL min<sup>-1</sup>, λ = 254 nm: t<sub>R</sub> (major) = 8.6 min, t<sub>R</sub> (minor) = 19.1 min.

Racemic sample

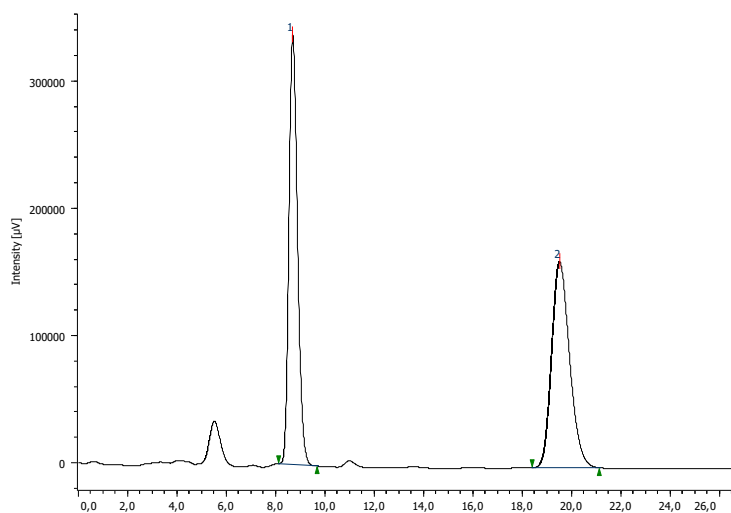

| # | t <sub>R</sub> | Area    | Height | Area%  | Height% | Symmetry Factor |
|---|----------------|---------|--------|--------|---------|-----------------|
| 1 | 8,683          | 8196550 | 337075 | 50,050 | 67,534  | 1,203           |
| 2 | 19,483         | 8180110 | 162042 | 49,950 | 32,466  | 1,226           |

Enantioselective reaction, er = 98:2

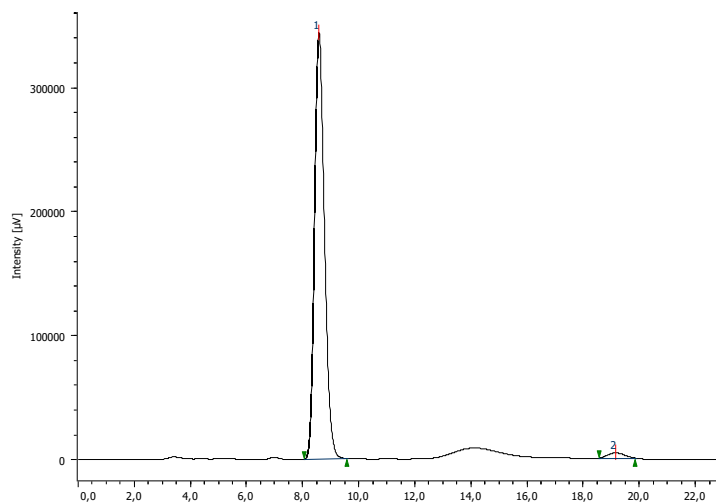

| # | t <sub>R</sub> | Area    | Height | Area%  | Height% | Symmetry Factor |
|---|----------------|---------|--------|--------|---------|-----------------|
| 1 | 8,575          | 8398289 | 342965 | 97,969 | 98,772  | 1,210           |
| 2 | 19,133         | 174143  | 4263   | 2,031  | 1,228   | 1,083           |

**Methyl (*R*)-4-((1-(2,6-dichlorobenzyl)-3-hydroxy-2-oxindolin-3-yl)ethynyl)benzoate (3e).**

Phenomenex Lux-Cellulose-1, hexane:isopropanol = 70:30, 1 mL min<sup>-1</sup>,  $\lambda$  = 254 nm:  $t_R$  (major) = 10.4 min,  $t_R$  (minor) = 13.9 min.

Racemic sample

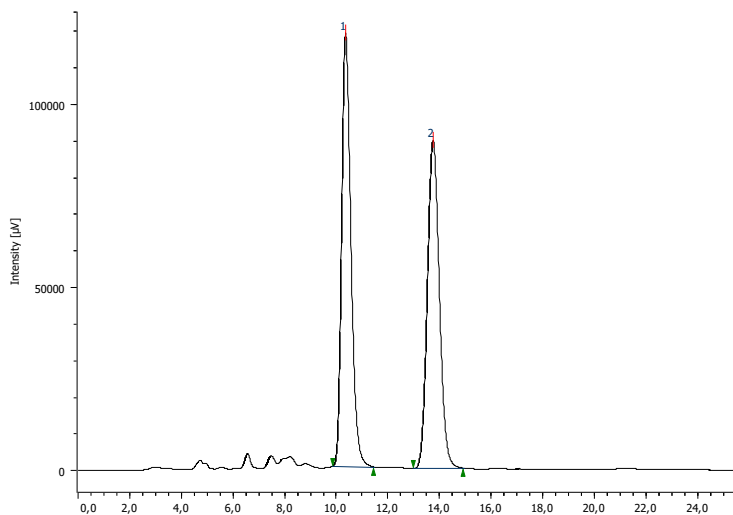

| # | $t_R$  | Area    | Height | Area%  | Height% | Symmetry Factor |
|---|--------|---------|--------|--------|---------|-----------------|
| 1 | 10,350 | 2970144 | 118194 | 51,027 | 56,975  | 1,283           |
| 2 | 13,733 | 2850535 | 89257  | 48,973 | 43,025  | 1,117           |

Enantioselective reaction, er = 97:3

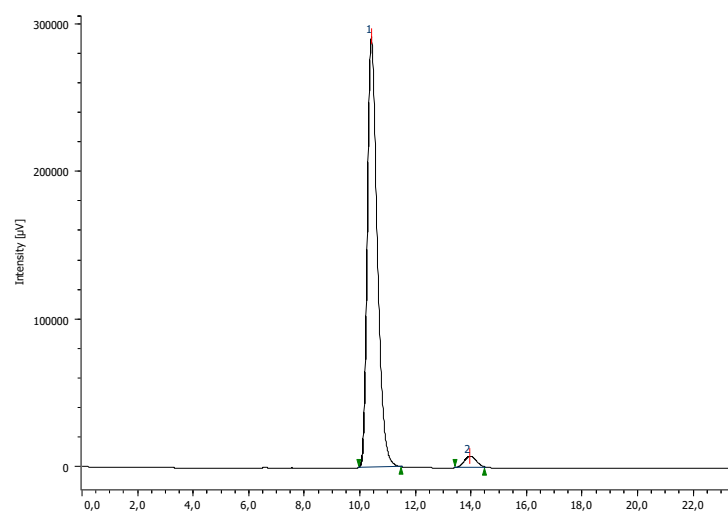

| # | $t_R$  | Area    | Height | Area%  | Height% | Symmetry Factor |
|---|--------|---------|--------|--------|---------|-----------------|
| 1 | 10,400 | 7256051 | 291102 | 97,017 | 97,520  | 1,391           |
| 2 | 13,950 | 223118  | 7403   | 2,983  | 2,480   | 1,021           |

**(R)-1-(2,6-dichlorobenzyl)-3-hydroxy-3-((3-methoxyphenyl)ethynyl)indolin-2-one (3f).**

Chiralpak AD-H, hexane:isopropanol = 70:30, 1 mL min<sup>-1</sup>,  $\lambda$  = 254 nm: t<sub>R</sub> (major) = 11.8 min, t<sub>R</sub> (minor) = 14.9 min.

Racemic sample

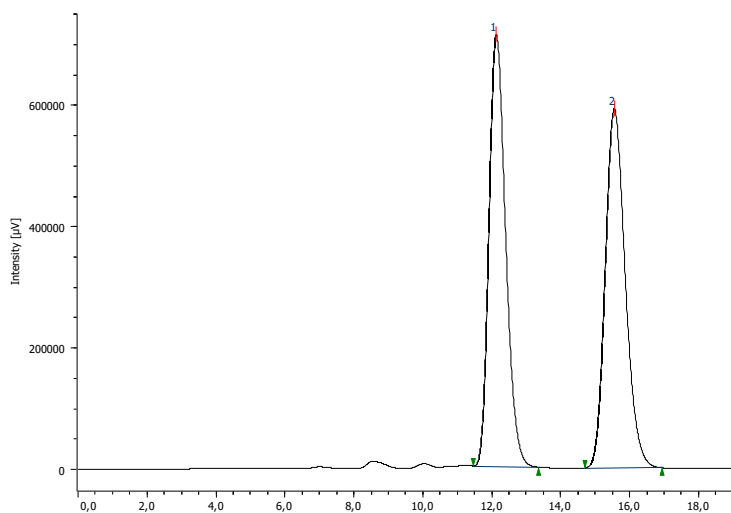

| # | t <sub>R</sub> | Area     | Height | Area%  | Height% | Symmetry Factor |
|---|----------------|----------|--------|--------|---------|-----------------|
| 1 | 12,117         | 23624311 | 709948 | 49,795 | 54,572  | 1,252           |
| 2 | 15,533         | 23818944 | 590980 | 50,205 | 45,428  | 1,198           |

Enantioselective reaction, 96:4

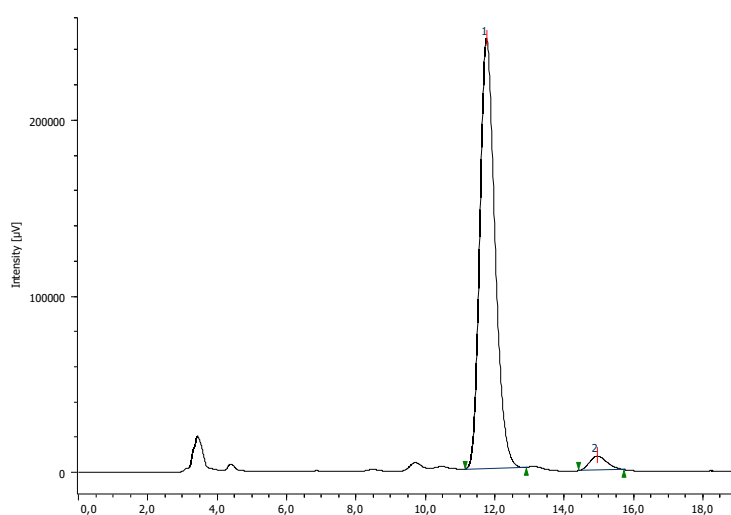

| # | t <sub>R</sub> | Area    | Height | Area%  | Height% | Symmetry Factor |
|---|----------------|---------|--------|--------|---------|-----------------|
| 1 | 11,750         | 7359961 | 243454 | 96,276 | 96,795  | 1,247           |
| 2 | 14,942         | 284718  | 8060   | 3,724  | 3,205   | 1,238           |

**(R)-1-(2,6-dichlorobenzyl)-3-hydroxy-3-(m-tolylethynyl)indolin-2-one (3g).**

Chiralpak AD-H, hexane:isopropanol = 70:30, 1 mL min<sup>-1</sup>,  $\lambda$  = 254 nm: t<sub>R</sub> (major) = 19.3 min, t<sub>R</sub> (minor) = 22.9 min.

Racemic sample

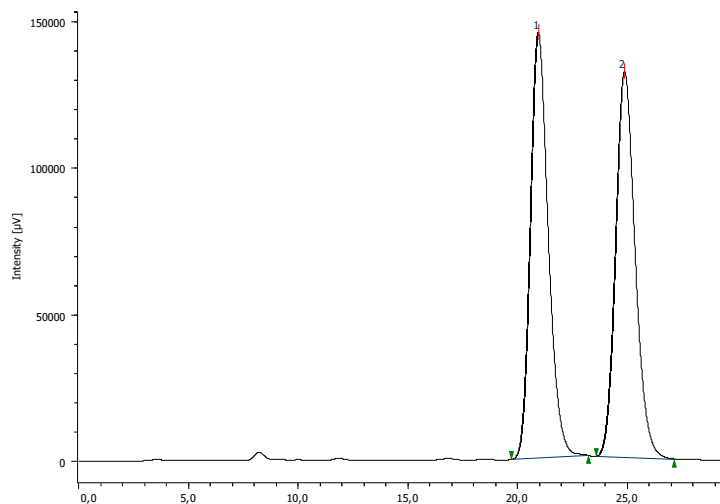

| # | t <sub>R</sub> | Area    | Height | Area%  | Height% | Symmetry Factor |
|---|----------------|---------|--------|--------|---------|-----------------|
| 1 | 20,917         | 8166796 | 144891 | 50,151 | 52,427  | 1,239           |
| 2 | 24,842         | 8117560 | 131479 | 49,849 | 47,573  | 1,171           |

Enantioselective reaction, er = 99:1

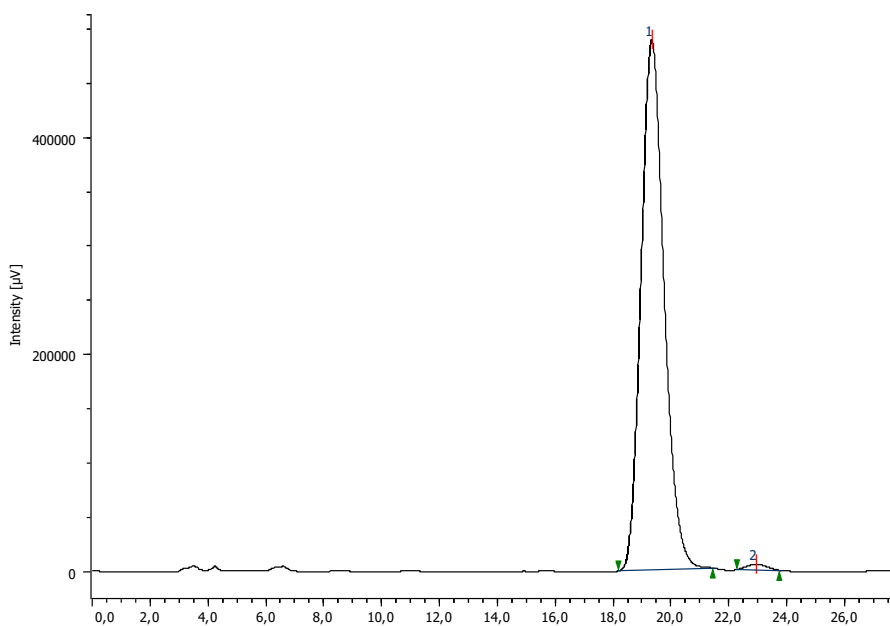

| # | t <sub>R</sub> | Area     | Height | Area%  | Height% | Symmetry Factor |
|---|----------------|----------|--------|--------|---------|-----------------|
| 1 | 19,308         | 26899301 | 487777 | 99,081 | 98,935  | 1,179           |
| 2 | 22,917         | 249530   | 5253   | 0,919  | 1,065   | 1,090           |

**(R)-3-((3-chlorophenyl)ethynyl)-1-(2,6-dichlorobenzyl)-3-hydroxyindolin-2-one (3h).**

Chiralpak AD-H, hexane:isopropanol = 70:30, 1 mL min<sup>-1</sup>, λ = 254 nm: t<sub>R</sub> (major) = 9.6 min, t<sub>R</sub> (minor) = 12.0 min.

Racemic sample

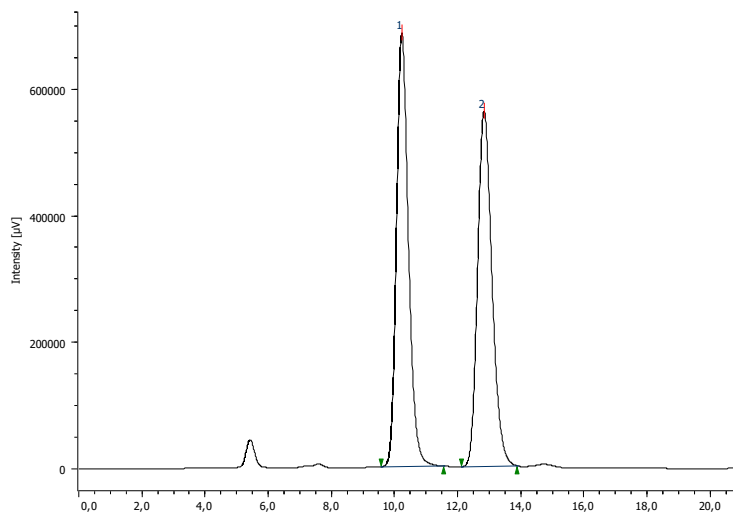

| # | t <sub>R</sub> | Area     | Height | Area%  | Height% | Symmetry Factor |
|---|----------------|----------|--------|--------|---------|-----------------|
| 1 | 10,217         | 17917447 | 684605 | 50,348 | 54,969  | 1,230           |
| 2 | 12,817         | 17669578 | 560836 | 49,652 | 45,031  | 1,224           |

Enantioselective reaction, 99:1

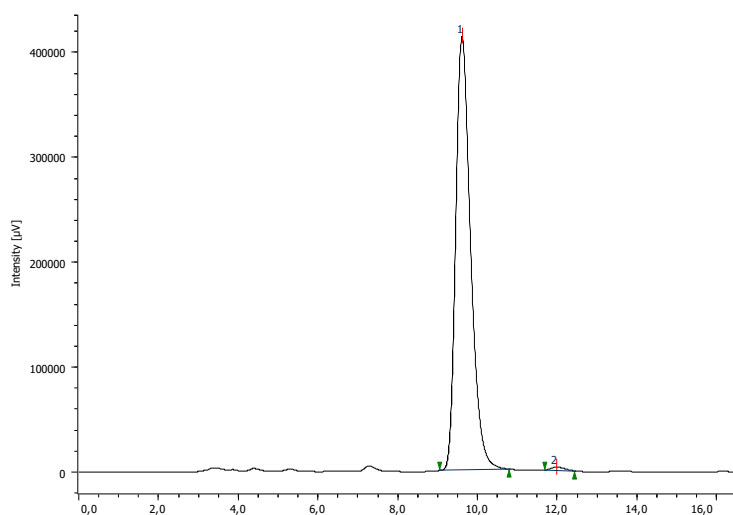

| # | t <sub>R</sub> | Area     | Height | Area%  | Height% | Symmetry Factor |
|---|----------------|----------|--------|--------|---------|-----------------|
| 1 | 9,600          | 10605960 | 412798 | 99,292 | 99,227  | 1,347           |
| 2 | 11,975         | 75612    | 3214   | 0,708  | 0,773   | 1,218           |



**(R)-1-(2,6-dichlorobenzyl)-3-((2-fluorophenyl)ethynyl)-3-hydroxyindolin-2-one (3i).**

Chiralpak AD-H, hexane:isopropanol = 80:20, 1 mL min<sup>-1</sup>,  $\lambda$  = 254 nm:  $t_R$  (major) = 17.1 min,  $t_R$  (minor) = 20.4 min.

Racemic sample

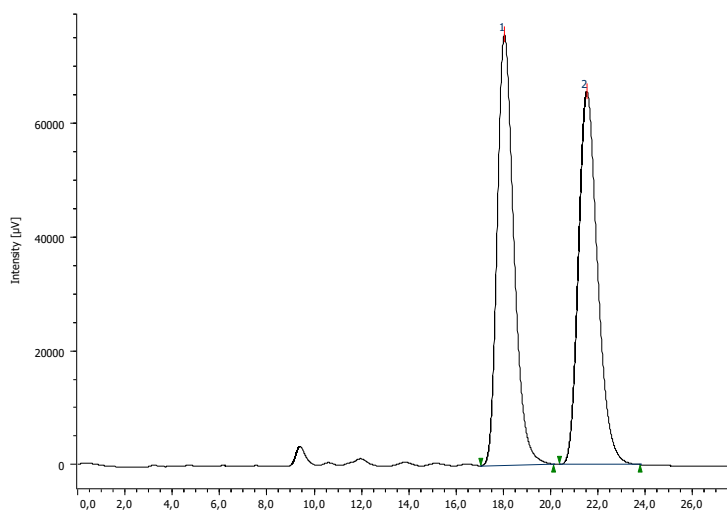

| # | $t_R$  | Area    | Height | Area%  | Height% | Symmetry Factor |
|---|--------|---------|--------|--------|---------|-----------------|
| 1 | 18,017 | 3703129 | 75430  | 50,443 | 53,568  | 1,306           |
| 2 | 21,508 | 3638041 | 65382  | 49,557 | 46,432  | 1,256           |

Enantioselective reaction, er: >99:1

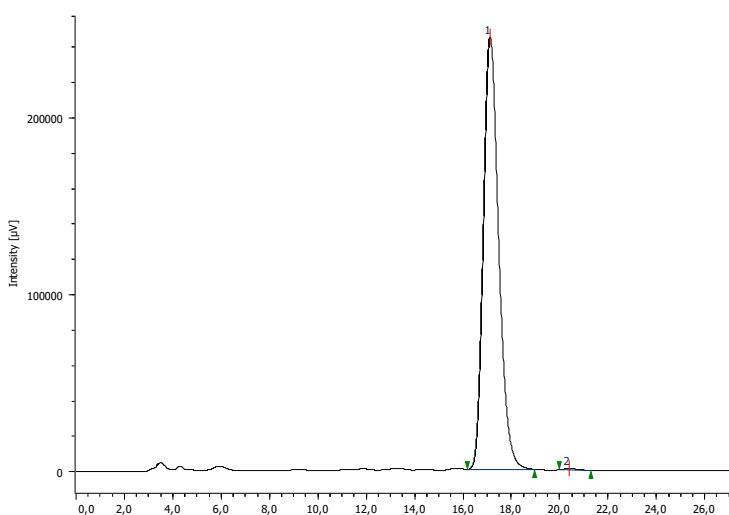

| # | $t_R$  | Area     | Height | Area%  | Height% | Symmetry Factor |
|---|--------|----------|--------|--------|---------|-----------------|
| 1 | 17,100 | 10675673 | 243944 | 99,723 | 99,708  | 1,254           |
| 2 | 20,358 | 29678    | 713    | 0,277  | 0,292   | 1,503           |

**(R)-1-(2,6-dichlorobenzyl)-3-hydroxy-3-((2-(trifluoromethyl)phenyl)ethynyl)indolin-2-one (3j).**

Chiralpak AD-H, hexane:isopropanol = 80:20, 1 mL min<sup>-1</sup>,  $\lambda$  = 254 nm: t<sub>R</sub> (major) = 14.9 min, t<sub>R</sub> (minor) = 20.4 min.

Racemic sample

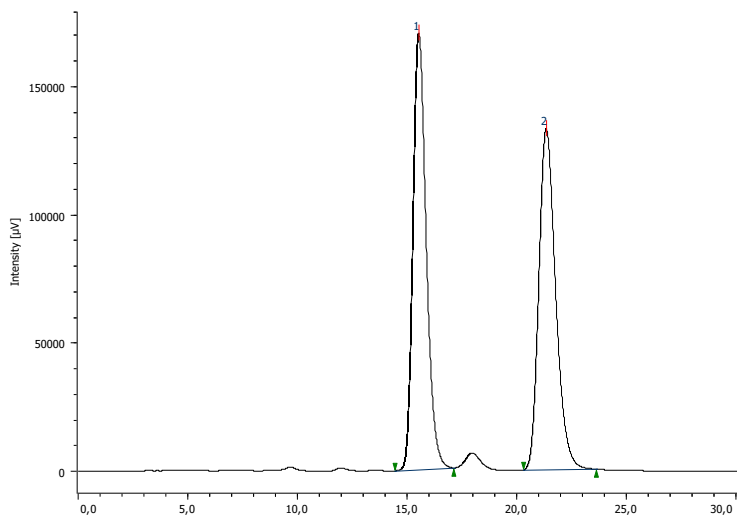

| # | tR     | Area    | Height | Area%  | Height% | Symmetry Factor |
|---|--------|---------|--------|--------|---------|-----------------|
| 1 | 15,508 | 7132803 | 169899 | 50,083 | 56,100  | 1,273           |
| 2 | 21,308 | 7109075 | 132954 | 49,917 | 43,900  | 1,269           |

Enantioselective reaction, er = 99:1

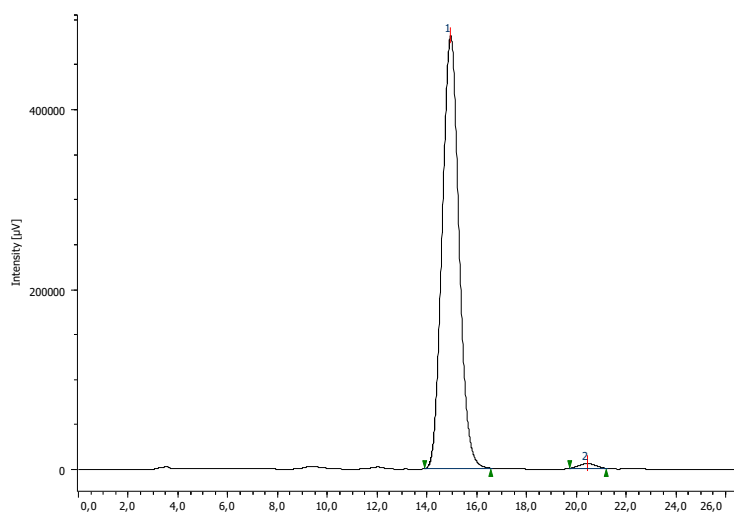

| # | tR     | Area     | Height | Area%  | Height% | Symmetry Factor |
|---|--------|----------|--------|--------|---------|-----------------|
| 1 | 14,933 | 22449414 | 479903 | 98,897 | 98,914  | 1,068           |
| 2 | 20,425 | 250402   | 5271   | 1,103  | 1,086   | 1,012           |

**(R)-1-(2,6-dichlorobenzyl)-3-(3,3-dimethylbut-1-yn-1-yl)-3-hydroxyindolin-2-one (3k).**

Phenomenex Lux-Cellulose-1, hexane:isopropanol = 90:10, 1 mL min<sup>-1</sup>, λ = 254 nm: t<sub>R</sub> (major) = 9.0 min, t<sub>R</sub> (minor) = 11.5 min.

Racemic sample

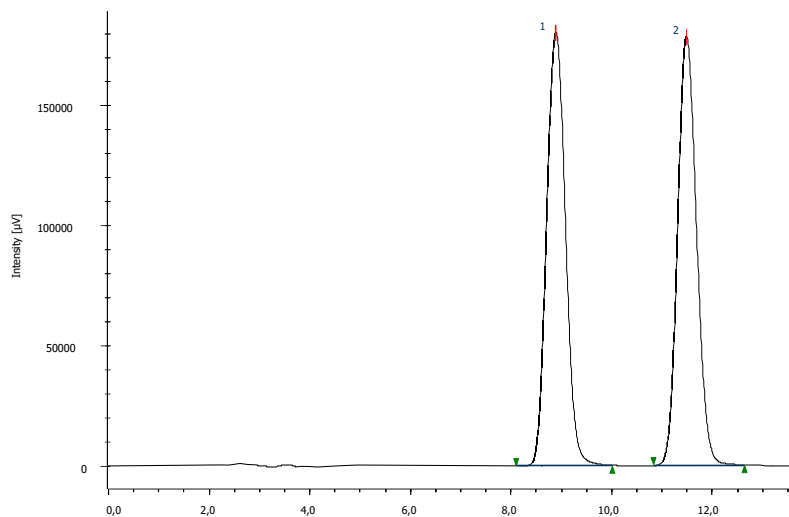

| # | t <sub>R</sub> | Area    | Height | Area%  | Height% | Symmetry Factor |
|---|----------------|---------|--------|--------|---------|-----------------|
| 1 | 9,156          | 6860023 | 181043 | 50,284 | 50,255  | 1,080           |
| 2 | 11,545         | 6782597 | 179206 | 49,716 | 49,745  | 1,116           |

Enantioselective reaction, er = 92:8

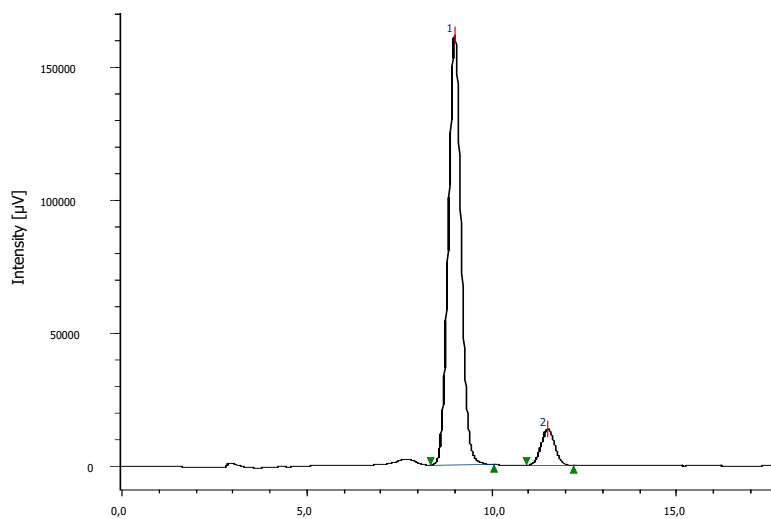

| # | t <sub>R</sub> | Area    | Height | Area%  | Height% | Symmetry Factor |
|---|----------------|---------|--------|--------|---------|-----------------|
| 1 | 8,983          | 3876892 | 161128 | 91,665 | 92,205  | 1,043           |
| 2 | 11,500         | 352506  | 13621  | 8,335  | 7,795   | 1,021           |

**(R)-1-(2,6-dichlorobenzyl)-3-hydroxy-3-(oct-1-yn-1-yl)indolin-2-one (3I).**

Chiralpak AD-H, hexane:isopropanol = 80:20, 1 mL min<sup>-1</sup>,  $\lambda$  = 254 nm:  $t_R$  (major) = 9.4,  $t_R$  (minor) = 12.0 min.

Racemic sample

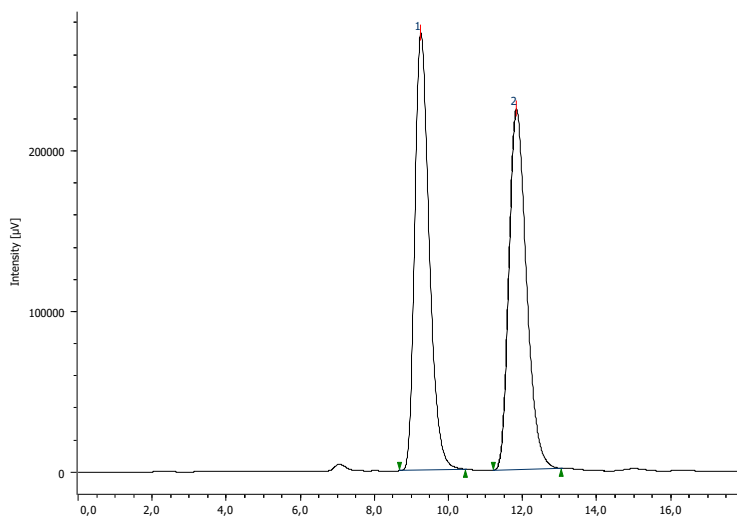

| # | $t_R$  | Area    | Height | Area%  | Height% | Symmetry Factor |
|---|--------|---------|--------|--------|---------|-----------------|
| 1 | 9,242  | 7390368 | 271630 | 50,199 | 54,822  | 1,352           |
| 2 | 11,825 | 7331806 | 223847 | 49,801 | 45,178  | 1,297           |

Enantioselective reaction, er = 81:19

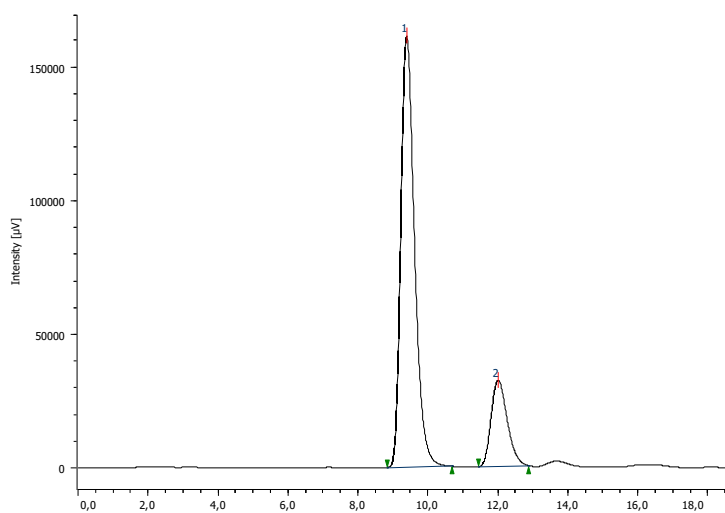

| # | $t_R$  | Area    | Height | Area%  | Height% | Symmetry Factor |
|---|--------|---------|--------|--------|---------|-----------------|
| 1 | 9,383  | 4355968 | 160910 | 80,913 | 83,324  | 1,343           |
| 2 | 11,992 | 1027561 | 32204  | 19,087 | 16,676  | 1,273           |

**(R)-1-(2,6-dichlorobenzyl)-3-hydroxy-3-(4-phenylbut-1-yn-1-yl)indolin-2-one (3m).**

Chiralpak AD-H, hexane:isopropanol = 70:30 , 1 mL min<sup>-1</sup>,  $\lambda$  = 254 nm: t<sub>R</sub> (major) = 12.0 min, t<sub>R</sub> (minor) = 17.2 min.

Racemic sample

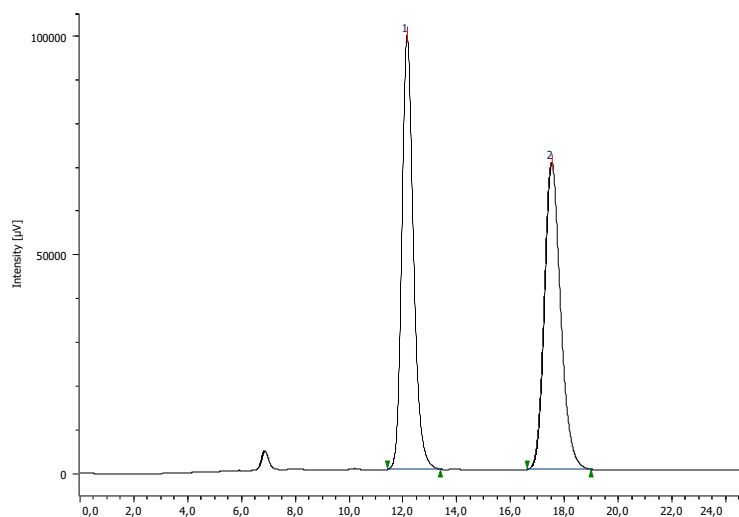

| # | t <sub>R</sub> | Area    | Height | Area%  | Height% | Symmetry Factor |
|---|----------------|---------|--------|--------|---------|-----------------|
| 1 | 12,142         | 2962496 | 99099  | 50,411 | 58,589  | 1,219           |
| 2 | 17,508         | 2914156 | 70043  | 49,589 | 41,411  | 1,214           |

Enantioselective reaction, er = 82:18

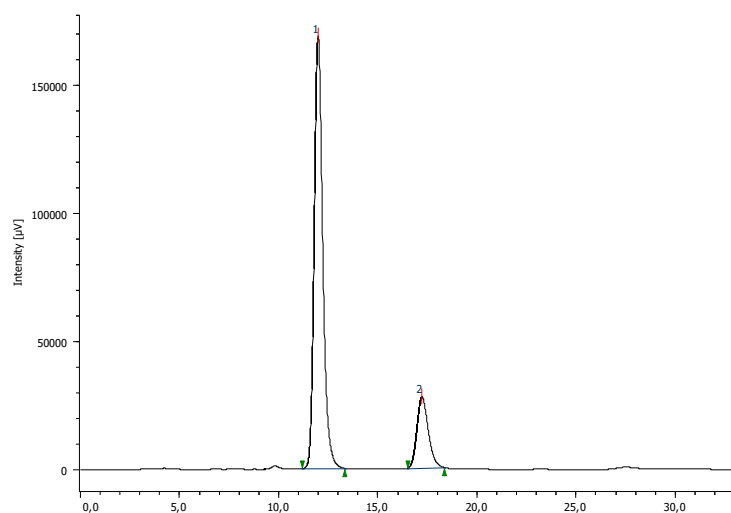

| # | t <sub>R</sub> | Area    | Height | Area%  | Height% | Symmetry Factor |
|---|----------------|---------|--------|--------|---------|-----------------|
| 1 | 11,975         | 4961663 | 168331 | 81,795 | 85,899  | 1,245           |
| 2 | 17,200         | 1104302 | 27634  | 18,205 | 14,101  | 1,231           |

**(R)-3-(4-bromobut-1-yn-1-yl)-1-(2,6-dichlorobenzyl)-3-hydroxyindolin-2-one (3n).**

Chiralpak AD-H, hexane:isopropanol = 70:30 , 1 mL min<sup>-1</sup>,  $\lambda$  = 254 nm:  $t_R$  (major) = 10.1 min,  $t_R$  (minor) = 13.8 min.

Racemic sample

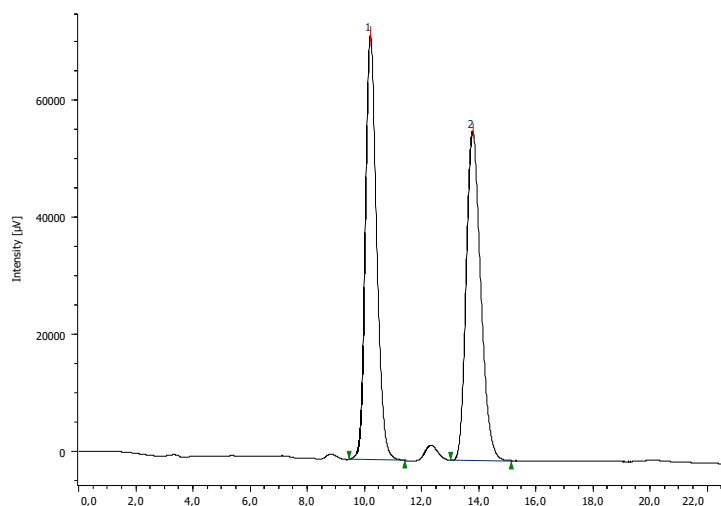

| # | $t_R$  | Area    | Height | Area%  | Height% | Symmetry Factor |
|---|--------|---------|--------|--------|---------|-----------------|
| 1 | 10,200 | 1991764 | 72498  | 50,260 | 56,360  | 1,211           |
| 2 | 13,775 | 1971154 | 56137  | 49,740 | 43,640  | 1,237           |

Enantioselective reaction, er = 99:1

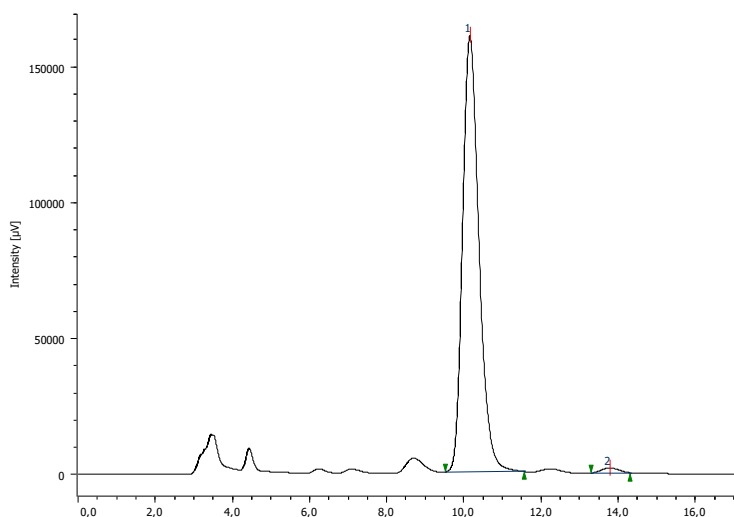

| # | $t_R$  | Area    | Height | Area%  | Height% | Symmetry Factor |
|---|--------|---------|--------|--------|---------|-----------------|
| 1 | 10,142 | 4701559 | 160353 | 98,771 | 98,848  | 1,266           |
| 2 | 13,758 | 58507   | 1869   | 1,229  | 1,152   | 1,084           |

**(S)-1-(2,6-dichlorobenzyl)-3-hydroxy-3-((trimethylsilyl)ethynyl)indolin-2-one (30).**

Phenomenex Lux-Cellulose-1, hexane:isopropanol = 95:5, 1 mL min<sup>-1</sup>,  $\lambda = 254$  nm:  $t_R$  (major) = 12.1 min,  $t_R$  (minor) = 18.2 min.

Racemic sample

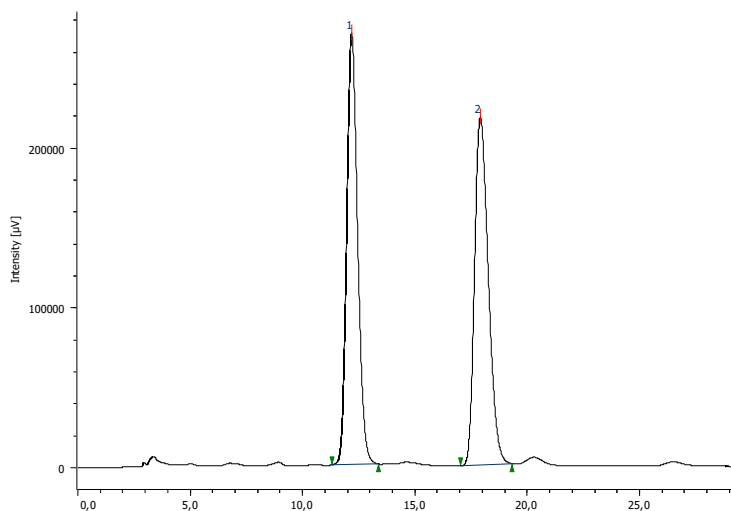

| # | $t_R$  | Area    | Height | Area%  | Height% | Symmetry Factor |
|---|--------|---------|--------|--------|---------|-----------------|
| 1 | 12,167 | 9123669 | 269698 | 49,801 | 55,372  | 1,185           |
| 2 | 17,892 | 9196432 | 217371 | 50,199 | 44,628  | 1,289           |

Enantioselective reaction, er = 95:5

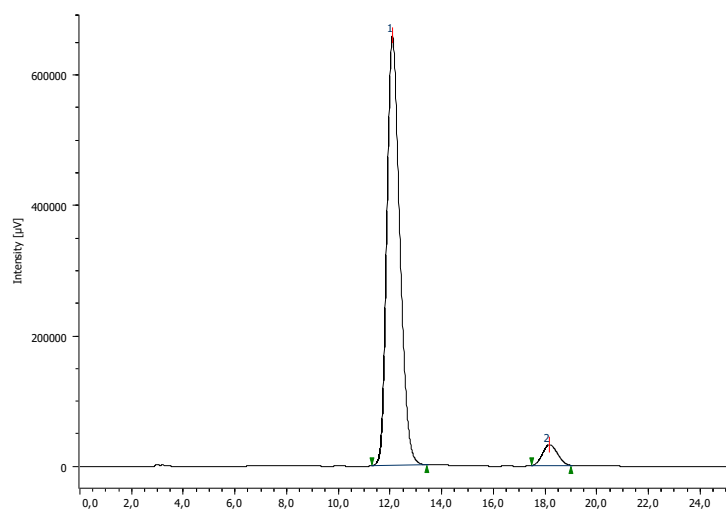

| # | $t_R$  | Area     | Height | Area%  | Height% | Symmetry Factor |
|---|--------|----------|--------|--------|---------|-----------------|
| 1 | 12,075 | 23012119 | 657697 | 94,734 | 95,370  | 1,264           |
| 2 | 18,150 | 1279240  | 31929  | 5,266  | 4,630   | 1,079           |

**(R)-3-(3-((tert-butyldimethylsilyl)oxy)prop-1-yn-1-yl)-1-(2,6-dichlorobenzyl)-3-hydroxyindolin-2-one (3p).**

Phenomenex Lux-Cellulose-1, hexane:isopropanol = 90:10, 1 mL min<sup>-1</sup>, λ = 254 nm: t<sub>R</sub> (major) = 11.8 min, t<sub>R</sub> (minor) = 18.0 min.

Racemic sample

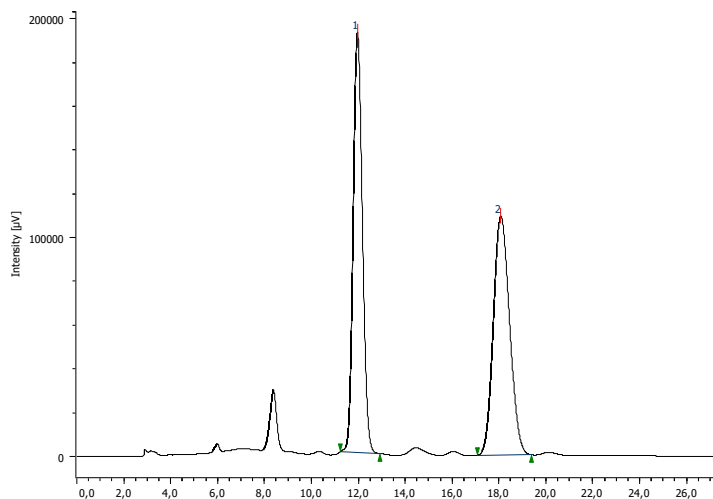

| # | t <sub>R</sub> | Area    | Height | Area%  | Height% | Symmetry Factor |
|---|----------------|---------|--------|--------|---------|-----------------|
| 1 | 11,950         | 5220459 | 191695 | 49,806 | 63,718  | 1,135           |
| 2 | 18,058         | 5261167 | 109154 | 50,194 | 36,282  | 1,129           |

Enantioselective reaction, er = 85:15

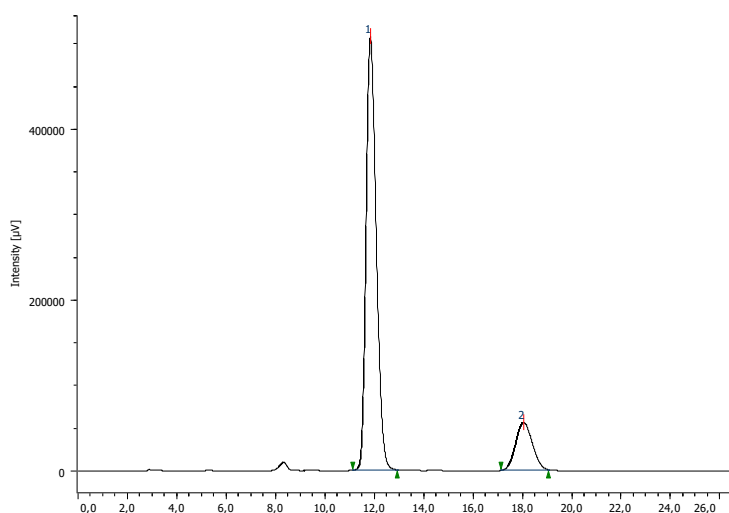

| # | t <sub>R</sub> | Area     | Height | Area%  | Height% | Symmetry Factor |
|---|----------------|----------|--------|--------|---------|-----------------|
| 1 | 11,825         | 14522859 | 506608 | 84,668 | 90,083  | 1,268           |
| 2 | 18,025         | 2629861  | 55770  | 15,332 | 9,917   | 1,073           |



**(R)-1-(2,6-dichlorobenzyl)-5-fluoro-3-hydroxy-3-(phenylethynyl)indolin-2-one (4a).**

Chiralpak AD-H, hexane:isopropanol = 70:30, 1 mL min<sup>-1</sup>,  $\lambda$  = 254 nm:  $t_R$  (major) = 10.8 min,  $t_R$  (minor) = 12.6 min.

Racemic sample

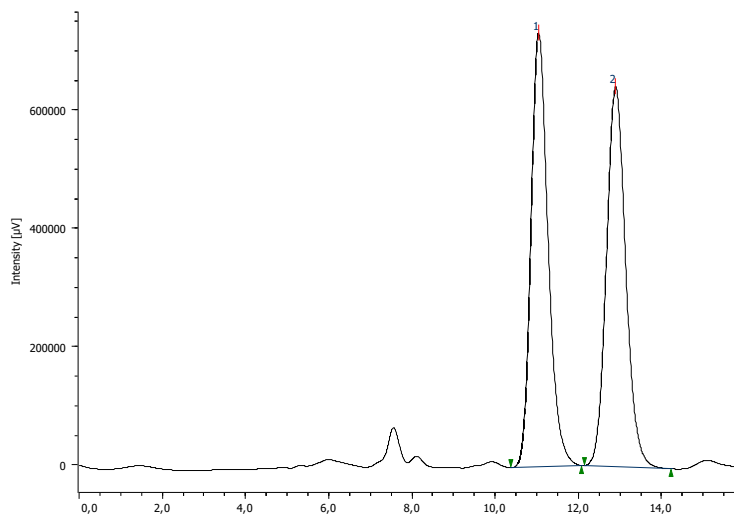

| # | $t_R$  | Area     | Height | Area%  | Height% | Symmetry Factor |
|---|--------|----------|--------|--------|---------|-----------------|
| 1 | 11,025 | 20942047 | 731914 | 50,377 | 53,308  | 1,250           |
| 2 | 12,875 | 20628390 | 641071 | 49,623 | 46,692  | 1,128           |

Enantioselective reaction, er = 98:2

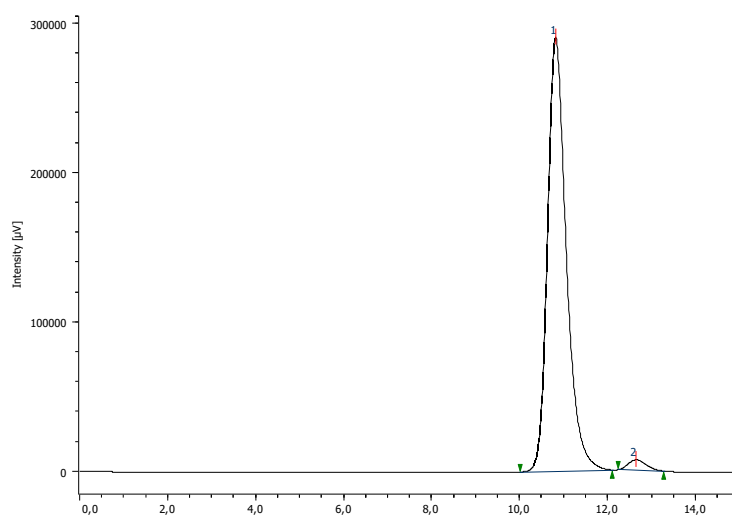

| # | $t_R$  | Area    | Height | Area%  | Height% | Symmetry Factor |
|---|--------|---------|--------|--------|---------|-----------------|
| 1 | 10,808 | 8579771 | 290087 | 97,728 | 97,641  | 1,299           |
| 2 | 12,633 | 199493  | 7010   | 2,272  | 2,359   | 1,221           |

**(R)-5-chloro-1-(2,6-dichlorobenzyl)-3-hydroxy-3-(phenylethynyl)indolin-2-one (4b).**

Chiralpak AD-H, hexane:isopropanol = 85:15, 1 mL min<sup>-1</sup>,  $\lambda$  = 254 nm:  $t_R$  (major) = 20.1 min,  $t_R$  (minor) = 22.7 min.

Racemic sample

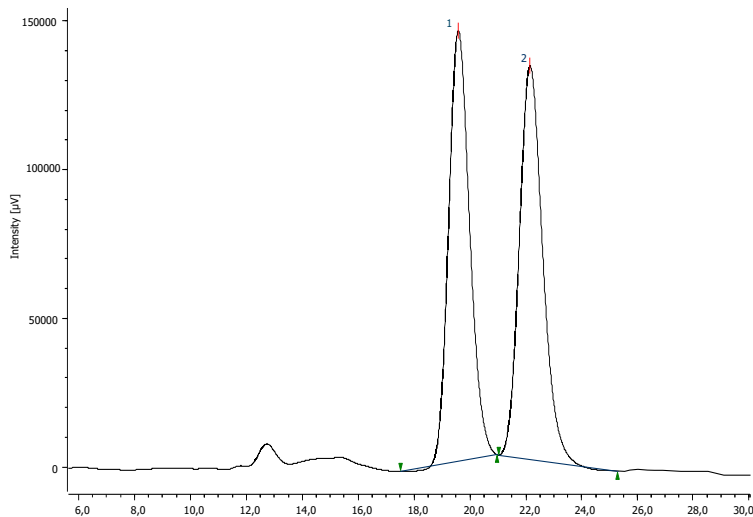

| # | $t_R$  | Area    | Height | Area%  | Height% | Symmetry Factor |
|---|--------|---------|--------|--------|---------|-----------------|
| 1 | 19,567 | 7570414 | 144648 | 49,718 | 52,282  | 1,157           |
| 2 | 22,125 | 7656352 | 132019 | 50,282 | 47,718  | 1,206           |

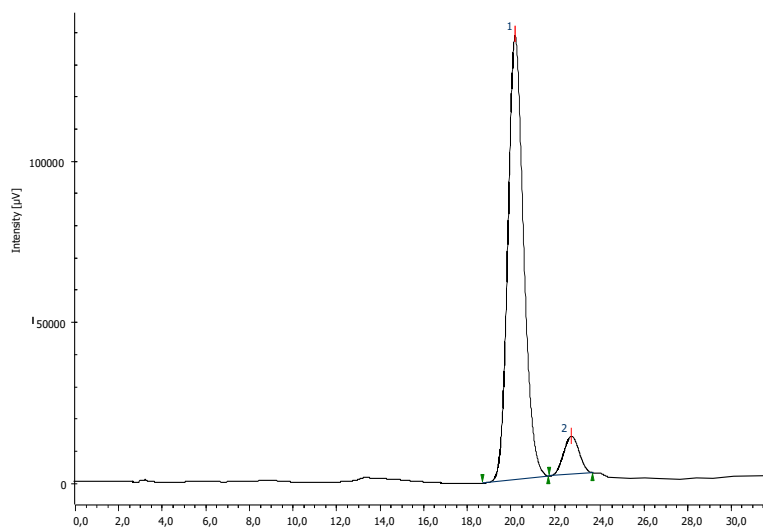

| # | $t_R$  | Area    | Height | Area%  | Height% | Symmetry Factor |
|---|--------|---------|--------|--------|---------|-----------------|
| 1 | 20,100 | 6859223 | 137435 | 92,058 | 92,032  | 1,171           |
| 2 | 22,658 | 591789  | 11900  | 7,942  | 7,968   | 1,009           |

**(R)-5-bromo-1-(2,6-dichlorobenzyl)-3-hydroxy-3-(phenylethynyl)indolin-2-one (4c).**

Chiralpak AD-H, hexane:isopropanol = 85:15, 1 mL min<sup>-1</sup>,  $\lambda$  = 254 nm:  $t_R$  (major) = 19.3 min,  $t_R$  (minor) = 22.3 min.

Racemic sample

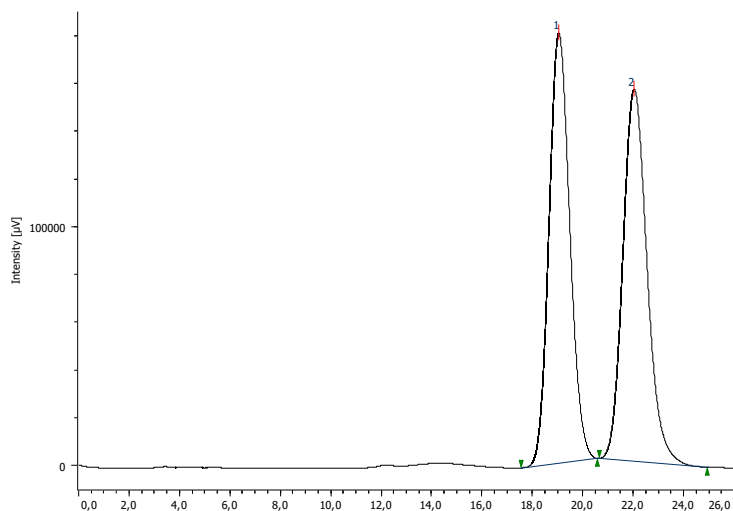

| # | $t_R$  | Area     | Height | Area%  | Height% | Symmetry Factor |
|---|--------|----------|--------|--------|---------|-----------------|
| 1 | 19,025 | 10324358 | 180036 | 50,127 | 53,615  | 1,111           |
| 2 | 22,008 | 10272127 | 155756 | 49,873 | 46,385  | 1,178           |

Enantioselective reaction, er = 99:1

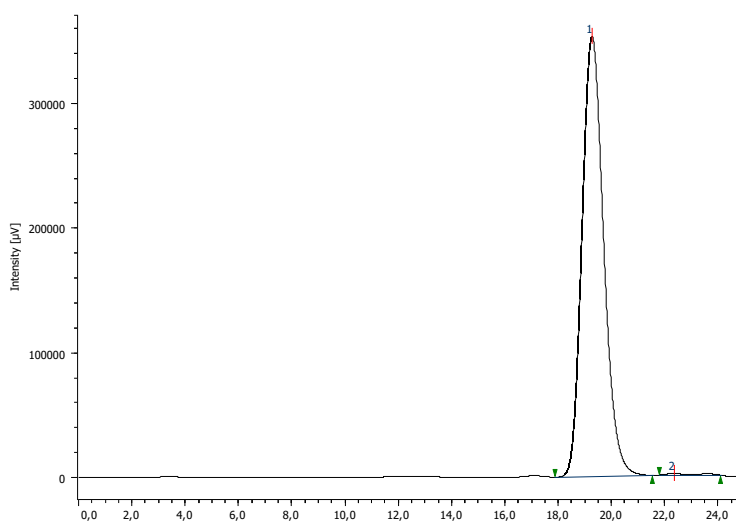

| # | $t_R$  | Area     | Height | Area%  | Height% | Symmetry Factor |
|---|--------|----------|--------|--------|---------|-----------------|
| 1 | 19,250 | 19767803 | 352281 | 99,458 | 99,627  | 1,183           |
| 2 | 22,325 | 107632   | 1321   | 0,542  | 0,373   | 2,071           |

**(R)-1-(2,6-dichlorobenzyl)-3-hydroxy-5-methyl-3-(phenylethynyl)indolin-2-one (4d).**

Chiralpak AD-H, hexane:isopropanol = 70:30, 1 mL min<sup>-1</sup>,  $\lambda$  = 254 nm:  $t_R$  (major) = 11.7 min,  $t_R$  (minor) = 15.2 min.

Racemic sample

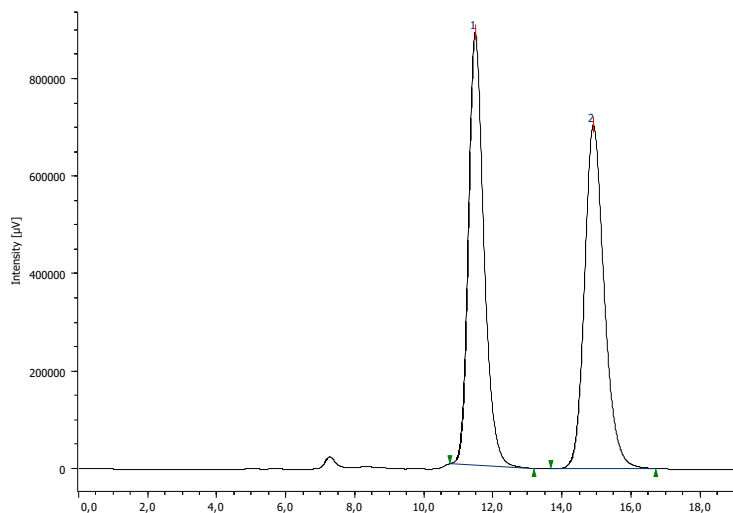

| # | $t_R$  | Area     | Height | Area%  | Height% | Symmetry Factor |
|---|--------|----------|--------|--------|---------|-----------------|
| 1 | 11,475 | 27646300 | 885002 | 49,770 | 55,682  | 1,258           |
| 2 | 14,892 | 27901805 | 704373 | 50,230 | 44,318  | 1,201           |

Enantioselective reaction, er = 97:3

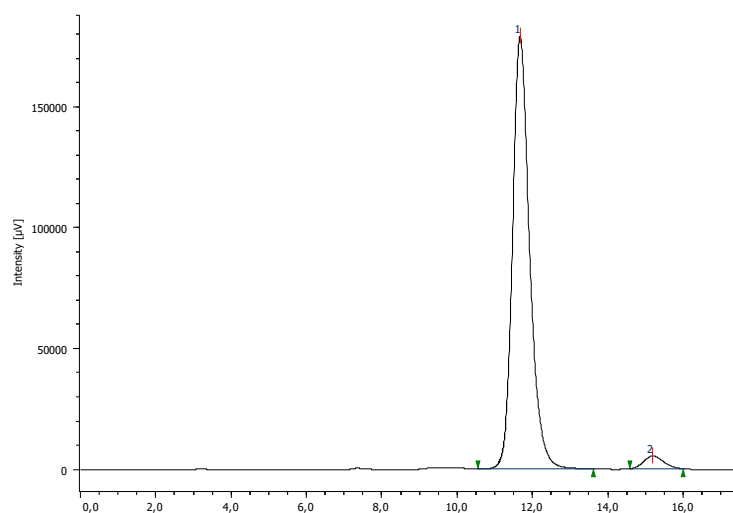

| # | $t_R$  | Area    | Height | Area%  | Height% | Symmetry Factor |
|---|--------|---------|--------|--------|---------|-----------------|
| 1 | 11,658 | 5632506 | 178637 | 96,649 | 97,136  | 1,234           |
| 2 | 15,175 | 195276  | 5266   | 3,351  | 2,864   | 1,153           |

**(R)-1-(2,6-dichlorobenzyl)-3-hydroxy-5-methoxy-3-(phenylethynyl)indolin-2-one (4e).**

Chiralpak AD-H, hexane:isopropanol = 70:30, 1 mL min<sup>-1</sup>,  $\lambda$  = 254 nm:  $t_R$  (major) = 14.9 min,  $t_R$  (minor) = 21.6 min.

Racemic sample

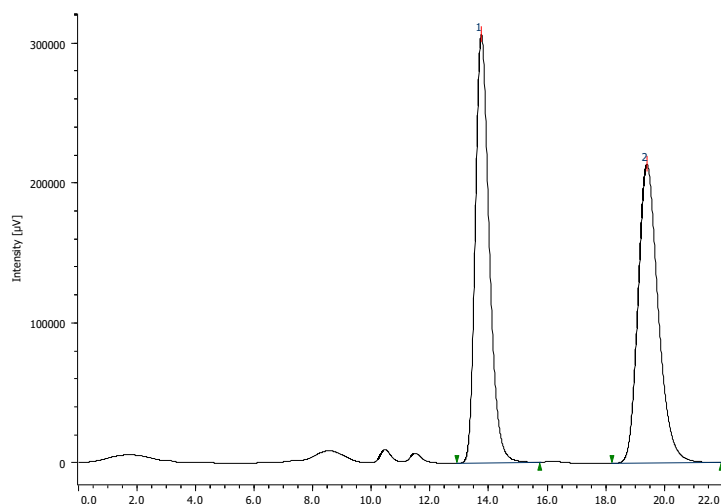

| # | $t_R$  | Area     | Height | Area%  | Height% | Symmetry Factor |
|---|--------|----------|--------|--------|---------|-----------------|
| 1 | 14,758 | 22867066 | 467423 | 50,826 | 59,774  | 1,080           |
| 2 | 21,300 | 22123582 | 314564 | 49,174 | 40,226  | 1,073           |

Enantioselective reaction, er = 98:2

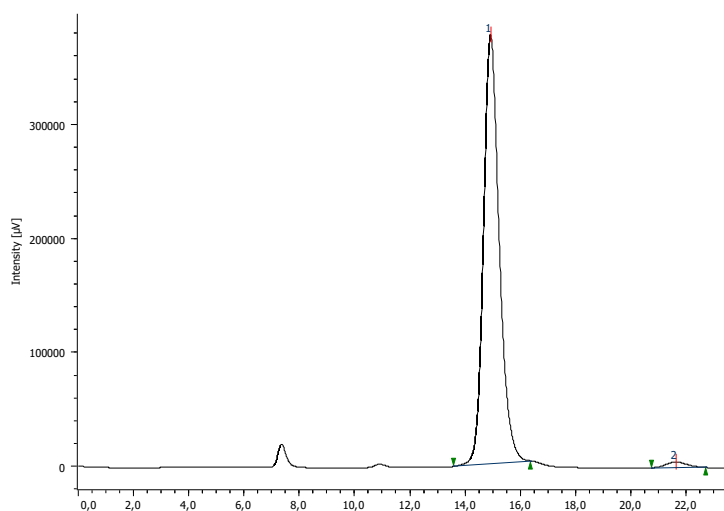

| # | $t_R$  | Area     | Height | Area%  | Height% | Symmetry Factor |
|---|--------|----------|--------|--------|---------|-----------------|
| 1 | 14,908 | 14796215 | 375419 | 98,250 | 98,692  | 1,211           |
| 2 | 21,600 | 263614   | 4976   | 1,750  | 1,308   | 1,137           |

**(R)-1-(2,6-dichlorobenzyl)-3-hydroxy-5-nitro-3-(phenylethynyl)indolin-2-one (4f).**

Phenomenex Lux Amylose-2, hexane:isopropanol = 80:20, 1 mL min<sup>-1</sup>, λ = 254 nm: t<sub>R</sub> (major) = 34.0 min, t<sub>R</sub> (minor) = 42.2 min.

Racemic sample

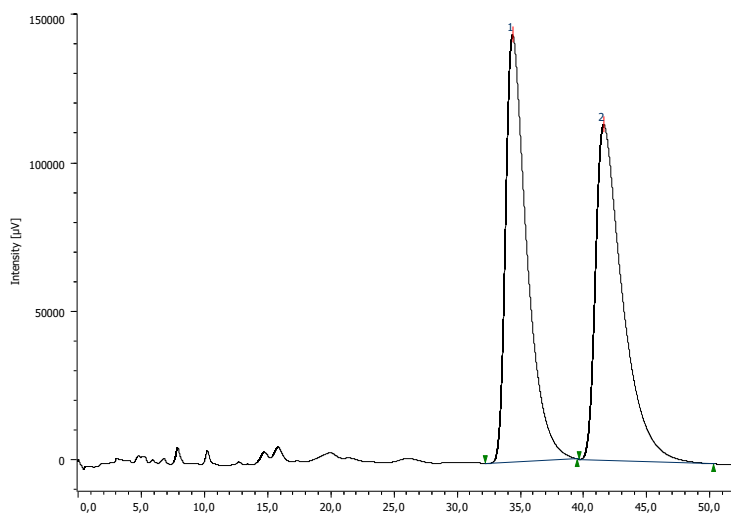

| # | t <sub>R</sub> | Area     | Height | Area%  | Height% | Symmetry Factor |
|---|----------------|----------|--------|--------|---------|-----------------|
| 1 | 34,333         | 16750566 | 143759 | 50,098 | 56,002  | 1,902           |
| 2 | 41,525         | 16685310 | 112942 | 49,902 | 43,998  | 2,120           |

Enantioselective reaction,

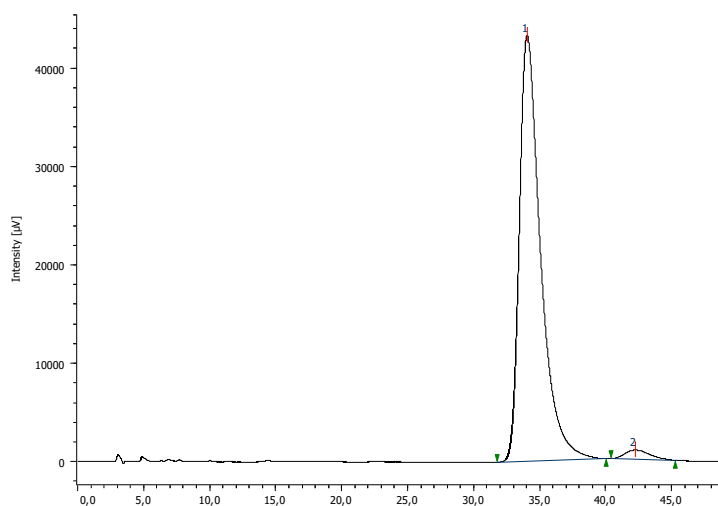

| # | v      | Area    | Height | Area%  | Height% | Symmetry Factor |
|---|--------|---------|--------|--------|---------|-----------------|
| 1 | 34,017 | 4824282 | 43189  | 97,520 | 97,860  | 1,638           |
| 2 | 42,158 | 122678  | 944    | 2,480  | 2,140   | 1,327           |

**(R)-1-(2,6-dichlorobenzyl)-3-hydroxy-7-methyl-3-(phenylethynyl)indolin-2-one (4g).**

Chiralpak AD-H, hexane:isopropanol = 70:30, 1 mL min<sup>-1</sup>,  $\lambda$  = 254 nm:  $t_R$  (major) = 11.8 min,  $t_R$  (minor) = 18.4 min.

Racemic sample

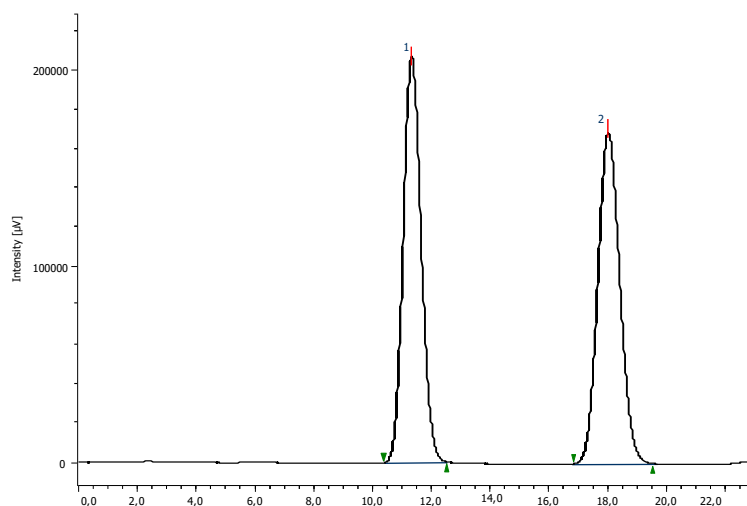

| # | $t_R$  | Area     | Height | Area%  | Height% | Symmetry Factor |
|---|--------|----------|--------|--------|---------|-----------------|
| 1 | 11,358 | 11314847 | 207334 | 50,836 | 55,227  | 1,106           |
| 2 | 18,094 | 10942771 | 168088 | 49,164 | 44,773  | 1,102           |

Enantioselective reaction, er = 95:5

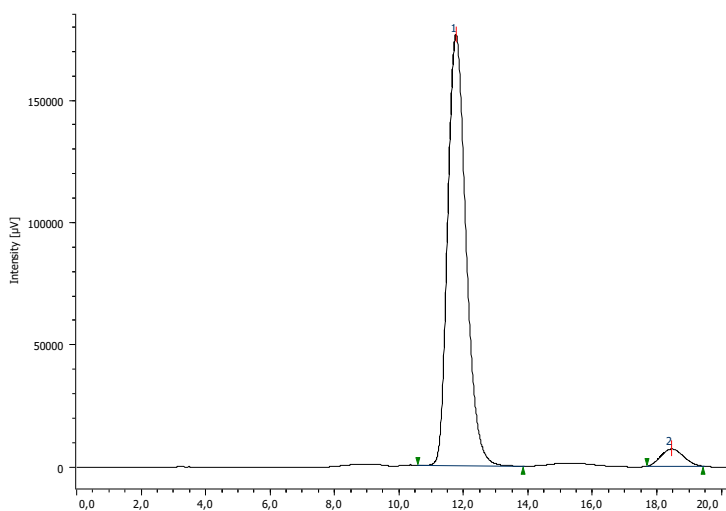

| # | $t_R$  | Area    | Height | Area%  | Height% | Symmetry Factor |
|---|--------|---------|--------|--------|---------|-----------------|
| 1 | 11,750 | 6906031 | 175901 | 95,268 | 96,174  | 1,258           |
| 2 | 18,442 | 343061  | 6997   | 4,732  | 3,826   | 1,107           |

**(R)-1-(2,6-dichlorobenzyl)-3-hydroxy-5-methoxy-3-(p-tolylolethynyl)indolin-2-one (4h).**

Chiralpak AD-H, hexane:isopropanol = 70:30, 1 mL min<sup>-1</sup>,  $\lambda$  = 254 nm:  $t_R$  (major) = 12.4 min,  $t_R$  (minor) = 20.1 min.

Racemic sample

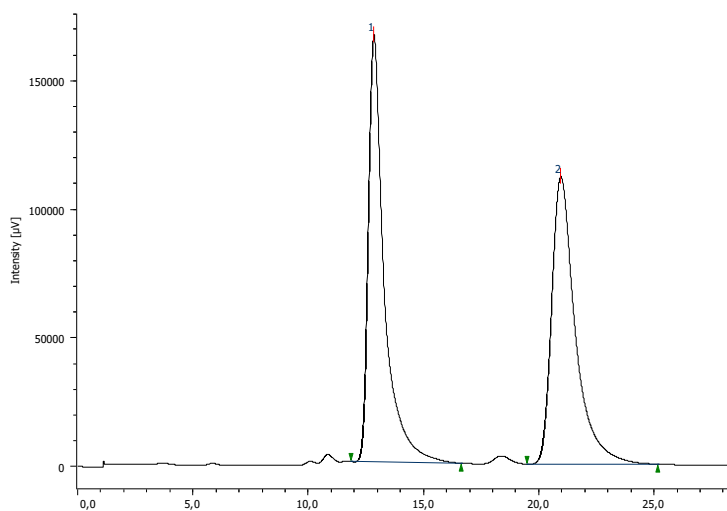

| # | $t_R$  | Area    | Height | Area%  | Height% | Symmetry Factor |
|---|--------|---------|--------|--------|---------|-----------------|
| 1 | 12,833 | 7949084 | 165769 | 49,977 | 59,768  | 2,009           |
| 2 | 20,933 | 7956526 | 111585 | 50,023 | 40,232  | 1,644           |

Enantioselective reaction, er = 99:1

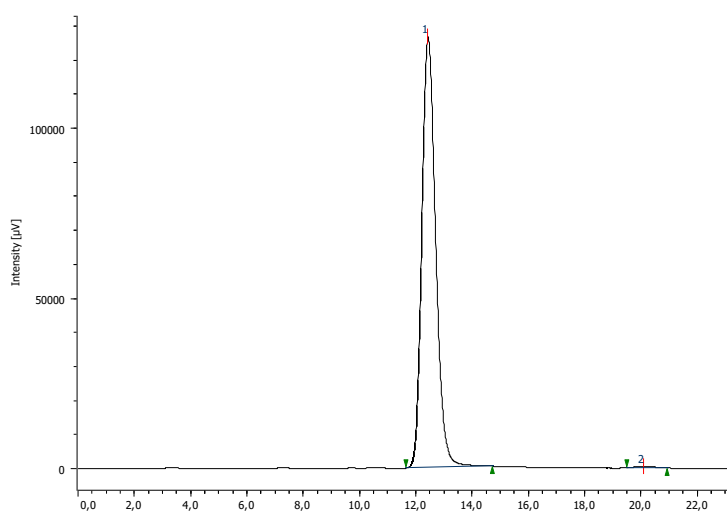

| # | $t_R$  | Area    | Height | Area%  | Height% | Symmetry Factor |
|---|--------|---------|--------|--------|---------|-----------------|
| 1 | 12,417 | 4324618 | 126200 | 99,485 | 99,596  | 1,222           |
| 2 | 20,067 | 22375   | 512    | 0,515  | 0,404   | 1,168           |



**(S)-1-(2,6-dichlorobenzyl)-3-hydroxy-5-methoxy-3-((trimethylsilyl)ethynyl)indolin-2-one (4i).**

Phenomenex Lux Cellulose-1, hexane:isopropanol = 95:5, 1 mL min<sup>-1</sup>,  $\lambda$  = 254 nm:  $t_R$  (major) = 13.5 min,  $t_R$  (minor) = 16.0 min.

Racemic sample

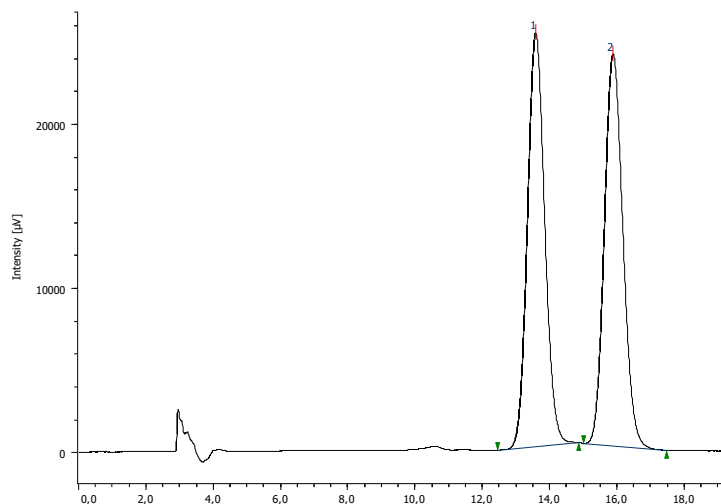

| # | $t_R$  | Area   | Height | Area%  | Height% | Symmetry Factor |
|---|--------|--------|--------|--------|---------|-----------------|
| 1 | 13,567 | 898037 | 25158  | 49,793 | 51,377  | 1,107           |
| 2 | 15,867 | 905514 | 23809  | 50,207 | 48,623  | 1,127           |

Enantioselective reaction, er = 94:6

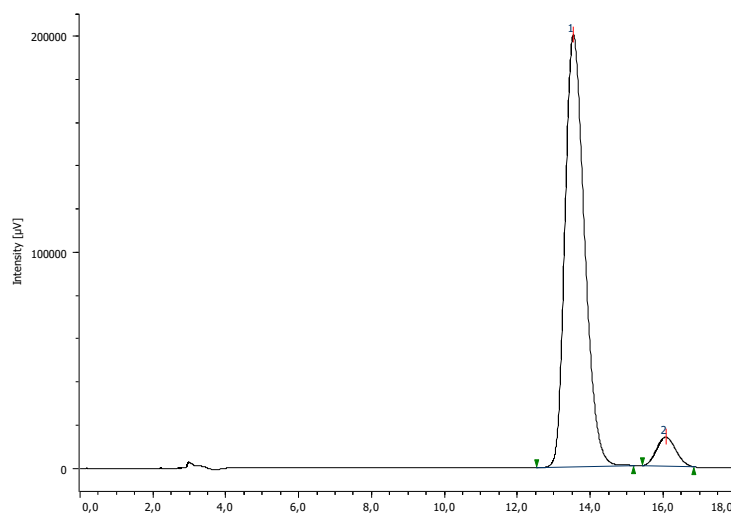

| # | $t_R$  | Area    | Height | Area%  | Height% | Symmetry Factor |
|---|--------|---------|--------|--------|---------|-----------------|
| 1 | 13,525 | 7386618 | 199452 | 93,782 | 93,707  | 1,282           |
| 2 | 16,050 | 489728  | 13393  | 6,218  | 6,293   | 1,103           |

**(R)-1-(2,6-dichlorobenzyl)-3-hydroxy-7-methyl-3-(p-tolylolethynyl)indolin-2-one (4j).**

Chiralpak AD-H, hexane:isopropanol = 70:30, 1 mL min<sup>-1</sup>,  $\lambda$  = 254 nm:  $t_R$  (major) = 10.5 min,  $t_R$  (minor) = 17.7 min.

Racemic sample

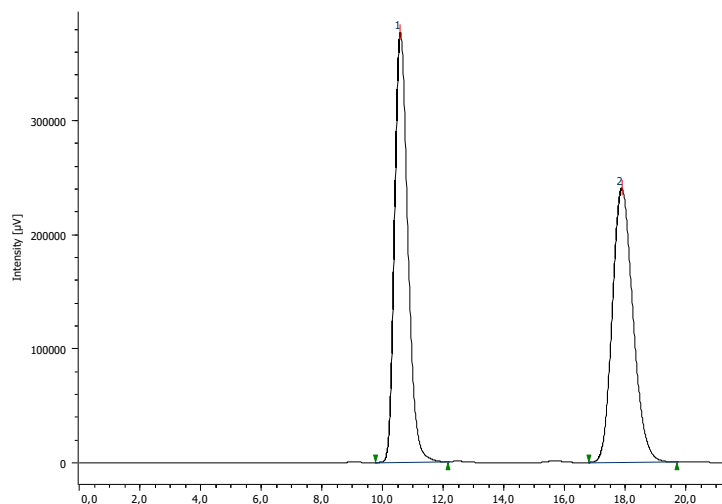

| # | $t_R$  | Area     | Height | Area%  | Height% | Symmetry Factor |
|---|--------|----------|--------|--------|---------|-----------------|
| 1 | 10,575 | 11335157 | 375676 | 50,101 | 61,067  | 1,262           |
| 2 | 17,858 | 11289362 | 239508 | 49,899 | 38,933  | 1,190           |

Enantioselective reaction, er = 97:3

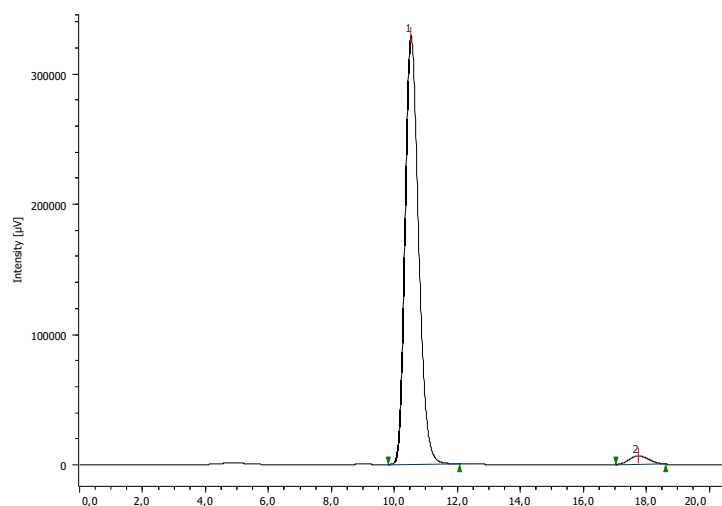

| # | $t_R$  | Area    | Height | Area%  | Height% | Symmetry Factor |
|---|--------|---------|--------|--------|---------|-----------------|
| 1 | 10,517 | 9823331 | 328626 | 97,191 | 98,058  | 1,240           |
| 2 | 17,725 | 283937  | 6508   | 2,809  | 1,942   | 1,124           |

**(S)-1-(2,6-dichlorobenzyl)-3-hydroxy-7-methyl-3-((trimethylsilyl)ethynyl)indolin-2-one (4k).**

Phenomenex Lux Cellulose-1, hexane:isopropanol = 95:5, 1 mL min<sup>-1</sup>, λ = 254 nm: t<sub>R</sub> (major) = 13.4 min, t<sub>R</sub> (minor) = 19.0 min.

Racemic sample

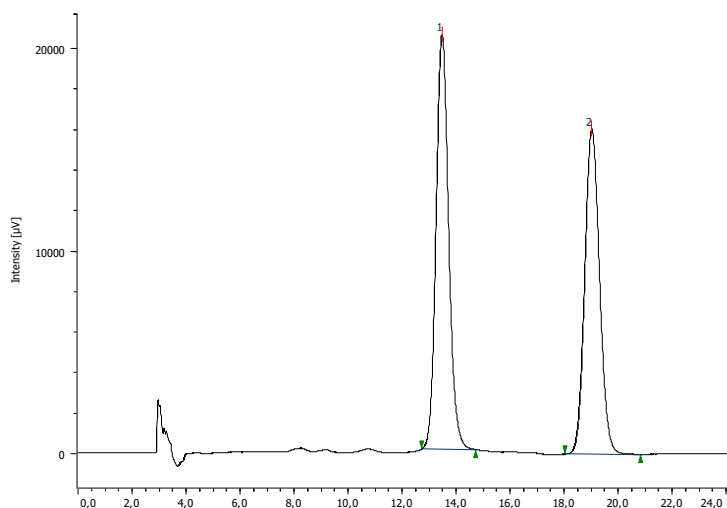

| # | t <sub>R</sub> | Area   | Height | Area%  | Height% | Symmetry Factor |
|---|----------------|--------|--------|--------|---------|-----------------|
| 1 | 13,467         | 659246 | 20443  | 51,815 | 56,040  | 1,113           |
| 2 | 19,000         | 613052 | 16036  | 48,185 | 43,960  | 1,093           |

Enantioselective reaction, er = 95:5

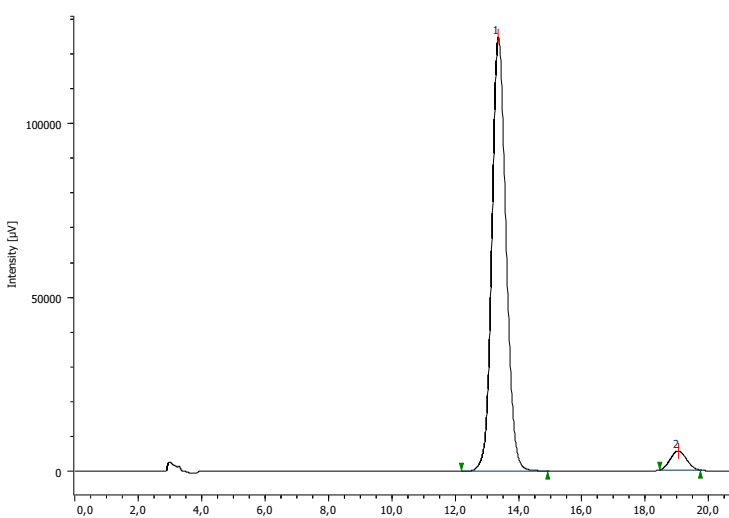

| # | t <sub>R</sub> | Area    | Height | Area%  | Height% | Symmetry Factor |
|---|----------------|---------|--------|--------|---------|-----------------|
| 1 | 13,350         | 3848166 | 124543 | 95,262 | 95,792  | 1,110           |
| 2 | 19,008         | 191401  | 5471   | 4,738  | 4,208   | 1,079           |

**(R)-3-(cyclopropylethynyl)-3-hydroxy-1-methylindolin-2-one (5a).**

Phenomenex Lux i-Amylose-3, hexane:isopropanol = 90:10, 1 mL min<sup>-1</sup>,  $\lambda$  = 254 nm):  $t_R$  (major) = 21.3 min,  $t_R$  (minor) = 24.0 min.

Racemic sample

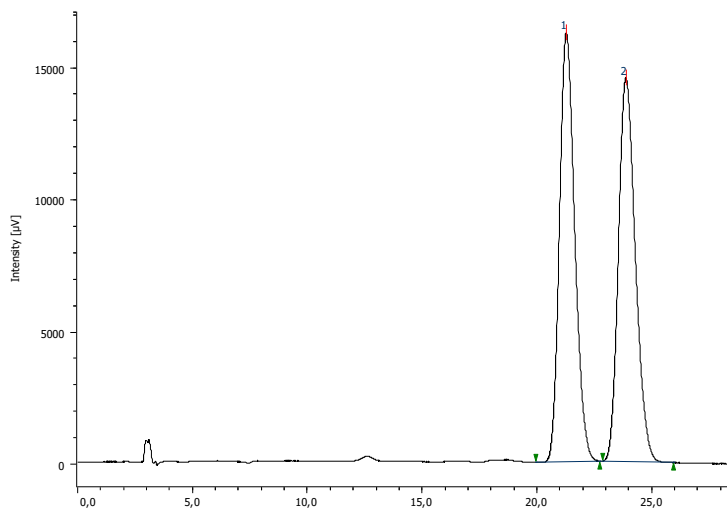

| # | $t_R$  | Area   | Height | Area%  | Height% | Symmetry Factor |
|---|--------|--------|--------|--------|---------|-----------------|
| 1 | 21,258 | 747055 | 16195  | 50,149 | 52,755  | 1,185           |
| 2 | 23,850 | 742612 | 14504  | 49,851 | 47,245  | 1,203           |

Enantioselective reaction, er = 98:2

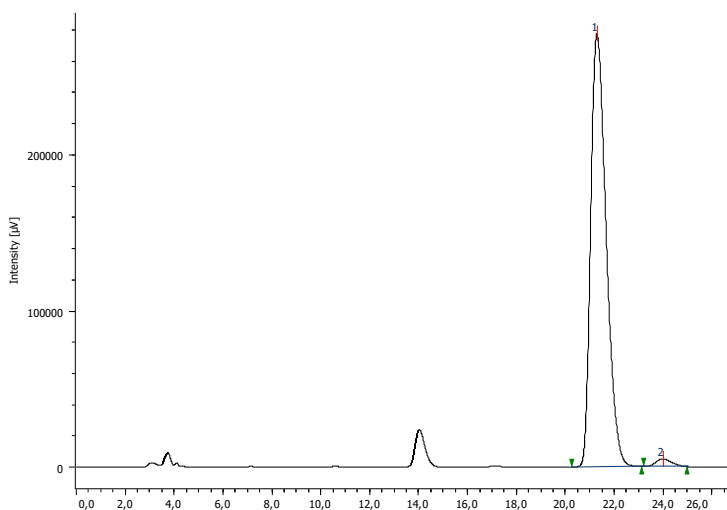

| # | $t_R$  | Area     | Height | Area%  | Height% | Symmetry Factor |
|---|--------|----------|--------|--------|---------|-----------------|
| 1 | 21,267 | 12107407 | 276503 | 98,221 | 98,280  | 1,381           |
| 2 | 23,958 | 219245   | 4839   | 1,779  | 1,720   | 1,209           |

**(R)-3-(hex-1-yn-1-yl)-3-hydroxy-1-methylindolin-2-one (5b).**

Phenomenex Lux i-Amylose-3, hexane:isopropanol = 90:10, 1 mL min<sup>-1</sup>,  $\lambda$  = 254 nm:  $t_R$  (major) = 15.5 min,  $t_R$  (minor) = 17.7 min.

Racemic sample

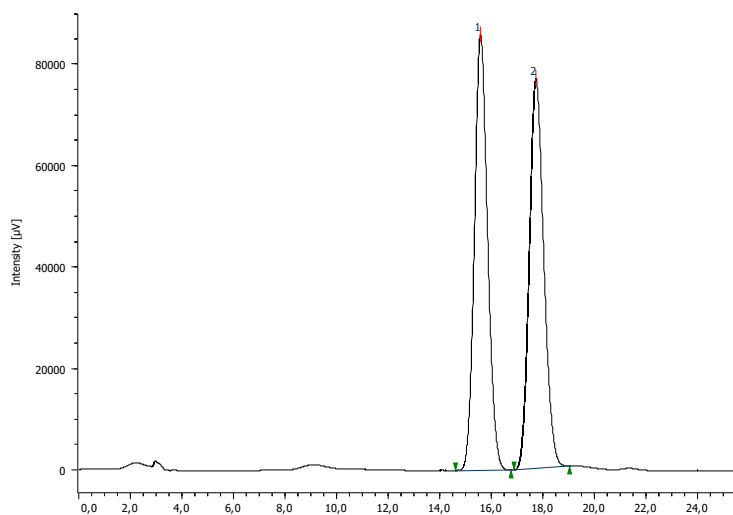

| # | tR     | Area    | Height | Area%  | Height% | Symmetry Factor |
|---|--------|---------|--------|--------|---------|-----------------|
| 1 | 15,558 | 3026708 | 85667  | 50,317 | 52,763  | 1,105           |
| 2 | 17,700 | 2988584 | 76696  | 49,683 | 47,237  | 1,143           |

Enantioselective reaction, er = 87:13

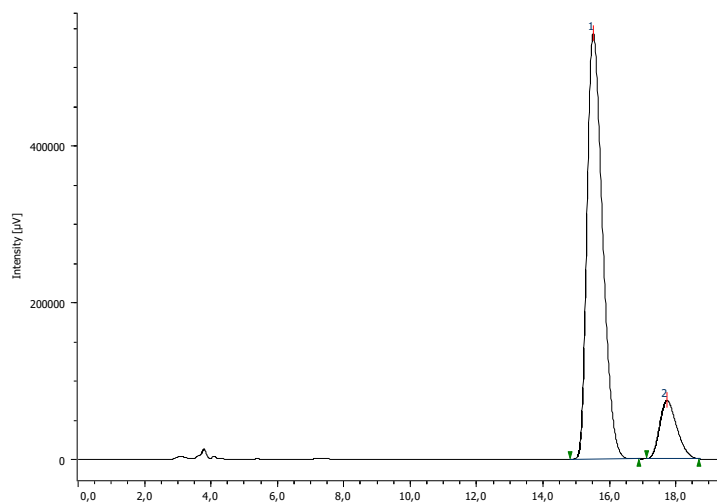

| # | tR     | Area     | Height | Area%  | Height% | Symmetry Factor |
|---|--------|----------|--------|--------|---------|-----------------|
| 1 | 15,492 | 17584576 | 542024 | 86,882 | 87,956  | 1,392           |
| 2 | 17,717 | 2655027  | 74220  | 13,118 | 12,044  | 1,259           |

**(S)-1-(2,6-Dichlorobenzyl)-3-(phenylamino)-3-(phenylethynyl)indolin-2-one (7a).**

Phenomenex Lux Cellulose-1, hexane:2-propanol 60:40, 1 mL/min,  $\lambda = 254$  nm,  $t_R$  (major) = 8.5 min,  $t_R$  (minor) = 13.1 min.

Racemic sample

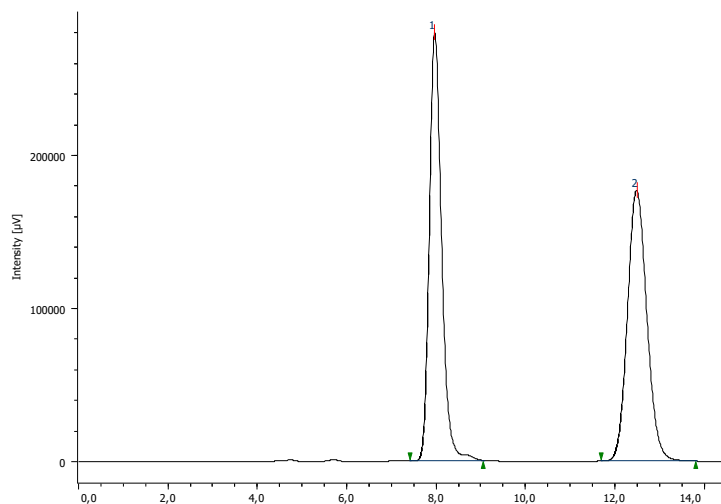

| # | $t_R$  | Area    | Height | Area%  | Height% | Resolution | Symmetry Factor |
|---|--------|---------|--------|--------|---------|------------|-----------------|
| 1 | 7,958  | 5348468 | 279106 | 50,120 | 61,268  | 7,090      | 1,251           |
| 2 | 12,475 | 5322889 | 176444 | 49,880 | 38,732  | N/A        | 1,106           |

Enantioselective reaction, er = 99:1

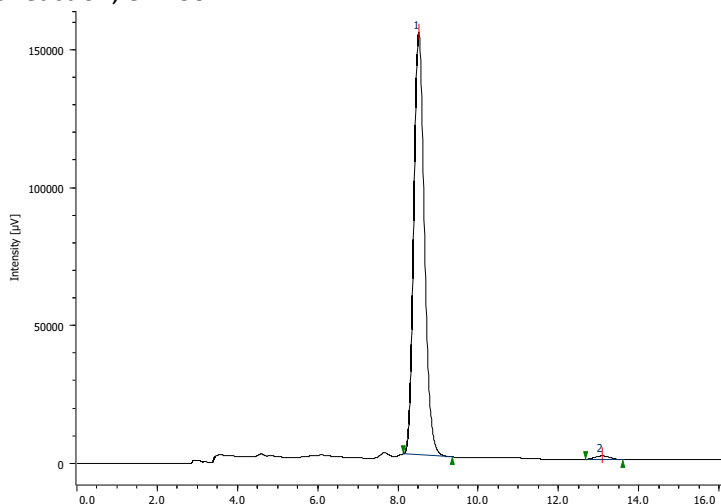

| # | $t_R$  | Area    | Height | Area%  | Height% | Resolution | Symmetry Factor |
|---|--------|---------|--------|--------|---------|------------|-----------------|
| 1 | 8,508  | 2805336 | 153080 | 98,849 | 99,187  | 7,688      | 1,165           |
| 2 | 13,075 | 32665   | 1255   | 1,151  | 0,813   | N/A        | 1,081           |

**(S)-1-(2,6-Dichlorobenzyl)-3-(phenylethynyl)-3-((4-(trifluoromethyl)phenyl)amino)indolin-2-one (7b).**

Phenomenex Lux Cellulose-1, hexane:2-propanol 60:40, 1 mL/min,  $\lambda = 254$  nm,  $t_R$  (major) = 6.4 min,  $t_R$  (minor) = 16.1 min.

Racemic sample

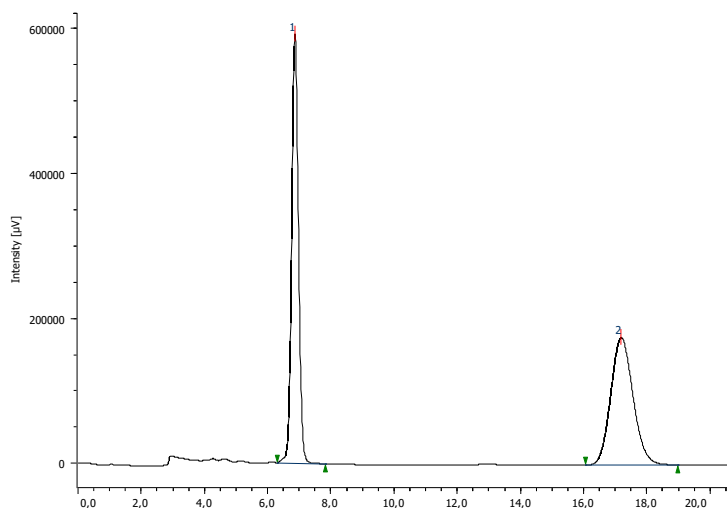

| # | $t_R$  | Area    | Height | Area%  | Height% | Resolution | Symmetry Factor |
|---|--------|---------|--------|--------|---------|------------|-----------------|
| 1 | 6,858  | 8817880 | 590546 | 50,677 | 77,106  | 12,366     | 1,056           |
| 2 | 17,167 | 8582147 | 175343 | 49,323 | 22,894  | N/A        | 1,130           |

Enantioselective reaction, er >99:1

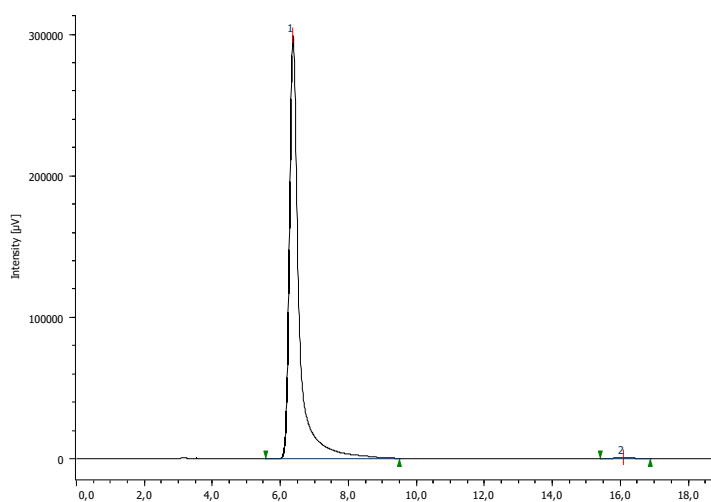

| # | $t_R$  | Area    | Height | Area%  | Height% | Resolution | Symmetry Factor |
|---|--------|---------|--------|--------|---------|------------|-----------------|
| 1 | 6,367  | 5883547 | 298233 | 99,655 | 99,842  | 12,032     | 1,892           |
| 2 | 16,067 | 20375   | 471    | 0,345  | 0,158   | N/A        | 1,095           |

**(S)-1-(2,6-Dichlorobenzyl)-3-((4-methoxyphenyl)amino)-3-(phenylethynyl)indolin-2-one (7c).**

Phenomenex Lux Cellulose-1, hexane:2-propanol 60:40, 1 mL/min,  $\lambda = 254$  nm,  $t_R$  (major) = 10.9 min,  $t_R$  (minor) = 22.3 min.

Racemic sample

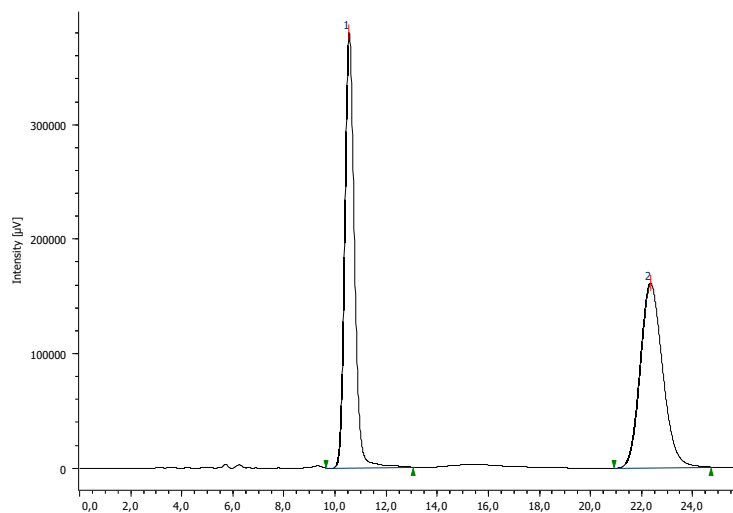

| # | $t_R$  | Area    | Height | Area%  | Height% | Resolution | Symmetry Factor |
|---|--------|---------|--------|--------|---------|------------|-----------------|
| 1 | 10,542 | 9972761 | 379071 | 50,433 | 70,195  | 10,442     | 1,148           |
| 2 | 22,317 | 9801631 | 160957 | 49,567 | 29,805  | N/A        | 1,166           |

Enantioselective reaction, er >99:1

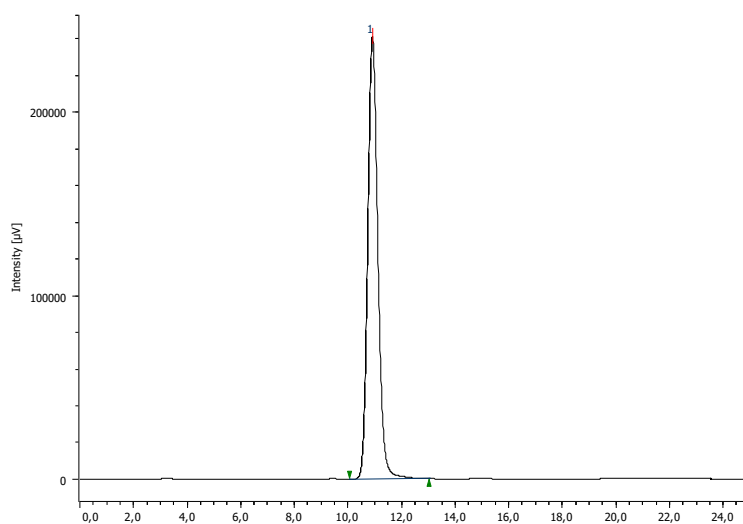

| # | $t_R$  | Area    | Height | Area%   | Height% | Resolution | Symmetry Factor |
|---|--------|---------|--------|---------|---------|------------|-----------------|
| 1 | 10,900 | 6359209 | 240596 | 100,000 | 100,000 | N/A        | 1,159           |



**(S)-1-(2,6-Dichlorobenzyl)-3-((2-methoxyphenyl)amino)-3-(phenylethynyl)indolin-2-one (7d).**

Phenomenex Lux Cellulose-1, hexane:2-propanol 93:7, 0.7 mL/min,  $\lambda = 254$  nm,  $t_R$  (major) = 27.5 min,  $t_R$  (minor) = 31.4 min.

Racemic sample

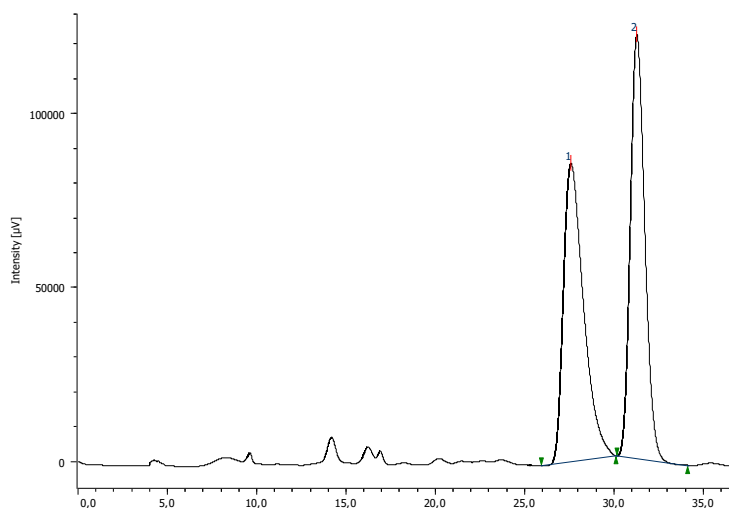

| # | $t_R$  | Area    | Height | Area%  | Height% | Resolution | Symmetry Factor |
|---|--------|---------|--------|--------|---------|------------|-----------------|
| 1 | 27,567 | 6714091 | 85607  | 49,415 | 41,331  | 2,090      | 1,605           |
| 2 | 31,242 | 6873170 | 121517 | 50,585 | 58,669  | N/A        | 1,193           |

Enantioselective reaction, er = 65:35

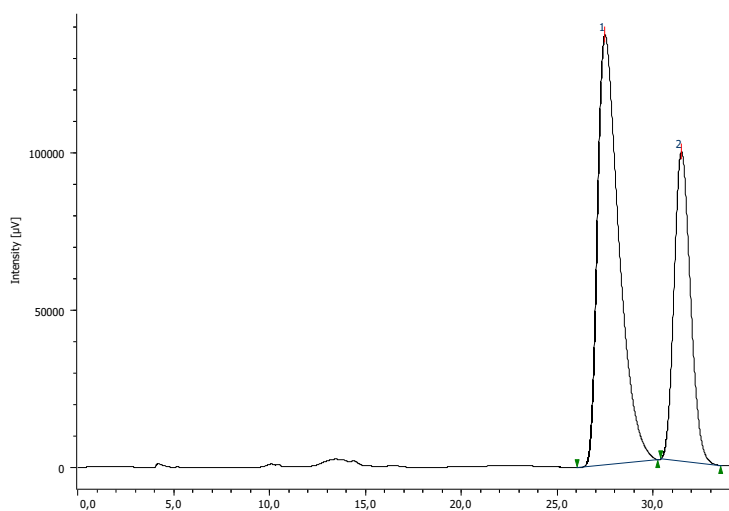

| # | $t_R$  | Area     | Height | Area%  | Height% | Resolution | Symmetry Factor |
|---|--------|----------|--------|--------|---------|------------|-----------------|
| 1 | 27,467 | 10618467 | 136260 | 64,629 | 58,160  | 2,225      | 1,719           |
| 2 | 31,442 | 5811505  | 98026  | 35,371 | 41,840  | N/A        | 1,186           |

**(S)-1-(2,6-Dichlorobenzyl)-3-(phenylethynyl)-3-(o-tolylamino)indolin-2-one (7e).**

Phenomenex Lux Cellulose-1, hexane:2-propanol 80:20, 1 mL/min,  $\lambda = 254$  nm,  $t_R$  (major) = 7.9 min,  $t_R$  (minor) = 9.1 min.

Racemic sample

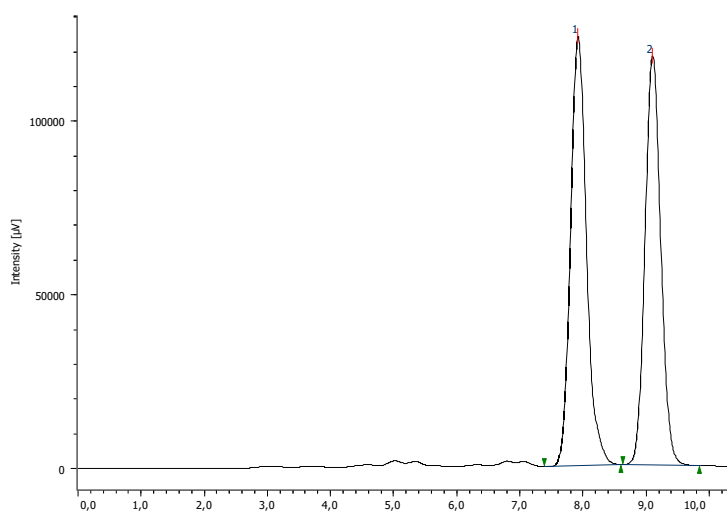

| # | $t_R$ | Area    | Height | Area%  | Height% | Resolution | Symmetry Factor |
|---|-------|---------|--------|--------|---------|------------|-----------------|
| 1 | 7,908 | 2165439 | 123292 | 51,507 | 51,199  | 2,614      | 1,207           |
| 2 | 9,092 | 2038727 | 117515 | 48,493 | 48,801  | N/A        | 1,079           |

Enantioselective reaction, er = 95:5

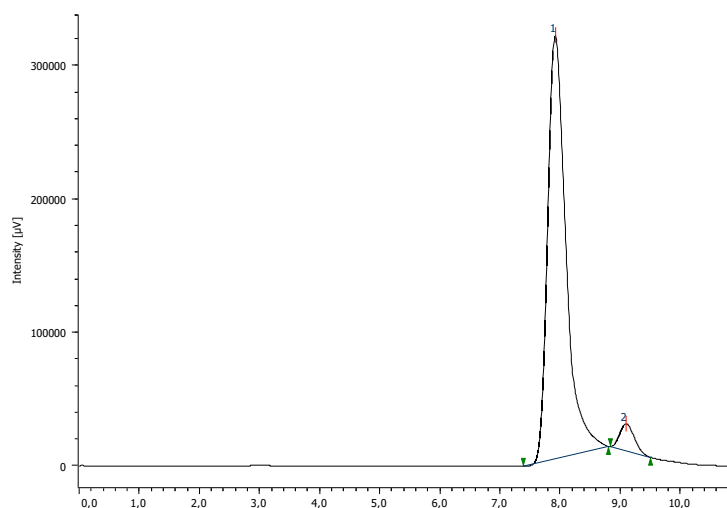

| # | $t_R$ | Area    | Height | Area%  | Height% | Resolution | Symmetry Factor |
|---|-------|---------|--------|--------|---------|------------|-----------------|
| 1 | 7,908 | 6683669 | 316446 | 95,146 | 93,959  | 2,416      | 1,534           |
| 2 | 9,092 | 340993  | 20347  | 4,854  | 6,041   | N/A        | 1,173           |

**(S)-1-(2,6-Dichlorobenzyl)-3-((3,5-dichlorophenyl)amino)-3-(phenylethynyl)indolin-2-one (7g).**

Phenomenex Lux Cellulose-1, hexane:2-propanol 60:40, 1 mL/min,  $\lambda = 254$  nm,  $t_R$  (major) = 6.1 min,  $t_R$  (minor) = 11.7 min.

Racemic sample

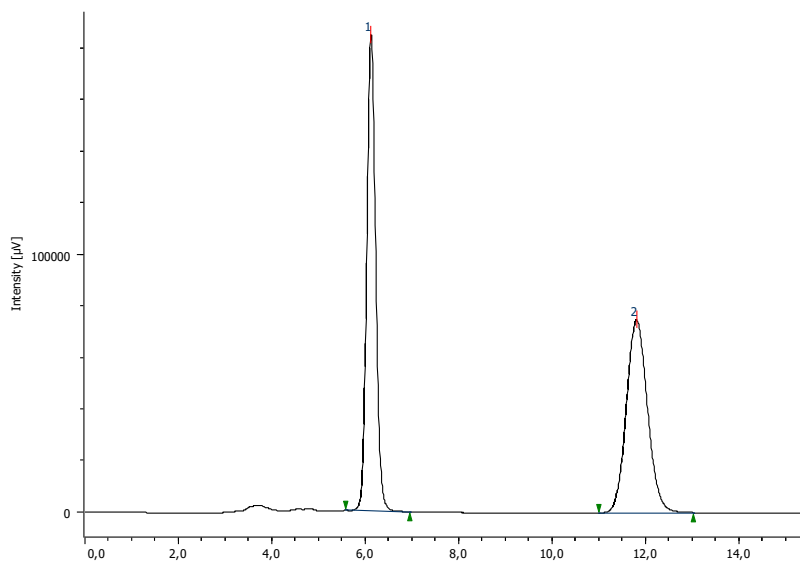

| # | $t_R$  | Area    | Height | Area%  | Height% | Resolution | Symmetry Factor |
|---|--------|---------|--------|--------|---------|------------|-----------------|
| 1 | 6,117  | 2437170 | 184292 | 50,859 | 71,156  | 9,748      | 1,102           |
| 2 | 11,800 | 2354860 | 74705  | 49,141 | 28,844  | N/A        | 1,092           |

Enantioselective reaction, er > 99:1

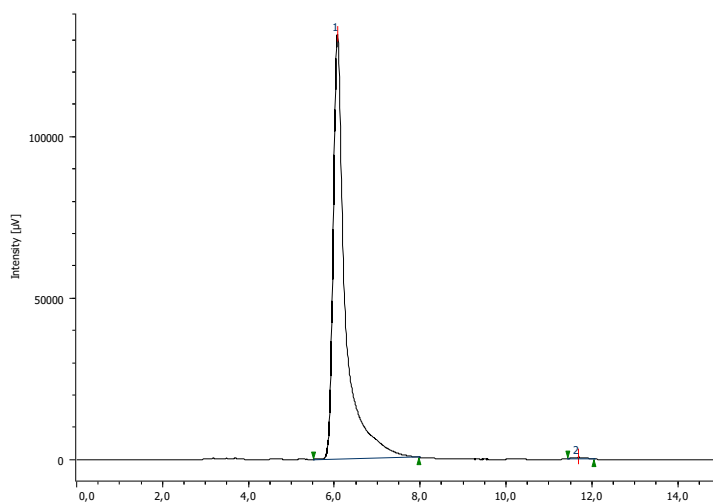

| # | $t_R$  | Area    | Height | Area%  | Height% | Resolution | Symmetry Factor |
|---|--------|---------|--------|--------|---------|------------|-----------------|
| 1 | 6,067  | 2597643 | 131188 | 99,637 | 99,664  | 11,100     | 2,449           |
| 2 | 11,667 | 9459    | 442    | 0,363  | 0,336   | N/A        | 1,205           |

**(S)-1-Benzyl-3-((3,5-dichlorophenyl)amino)-3-(phenylethynyl)indolin-2-one (7h).**

Phenomenex Lux Cellulose-1, hexane:2-propanol 80:20, 1 mL/min,  $\lambda = 254$  nm,  $t_R$  (major) = 6.9 min,  $t_R$  (minor) = 15.7 min.

Racemic sample

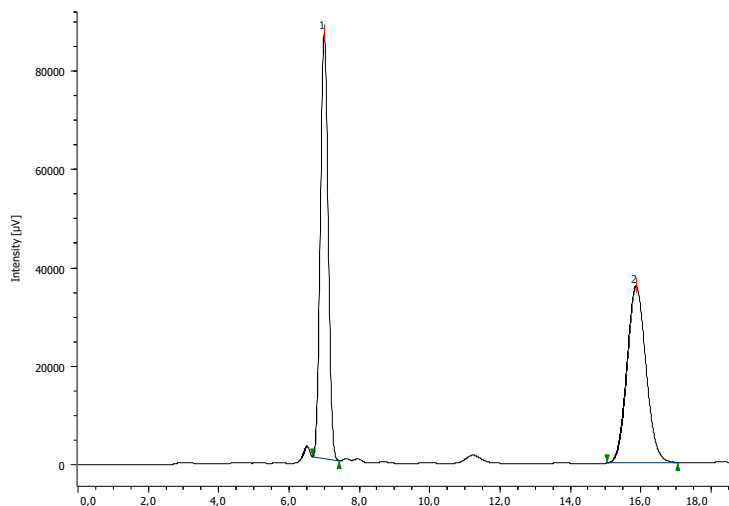

| # | $t_R$  | Area    | Height | Area%  | Height% | Resolution | Symmetry Factor |
|---|--------|---------|--------|--------|---------|------------|-----------------|
| 1 | 6,992  | 1327930 | 86355  | 49,658 | 70,678  | 12,688     | 1,026           |
| 2 | 15,850 | 1346204 | 35826  | 50,342 | 29,322  | N/A        | 1,088           |

Enantioselective reaction, er = 94:6

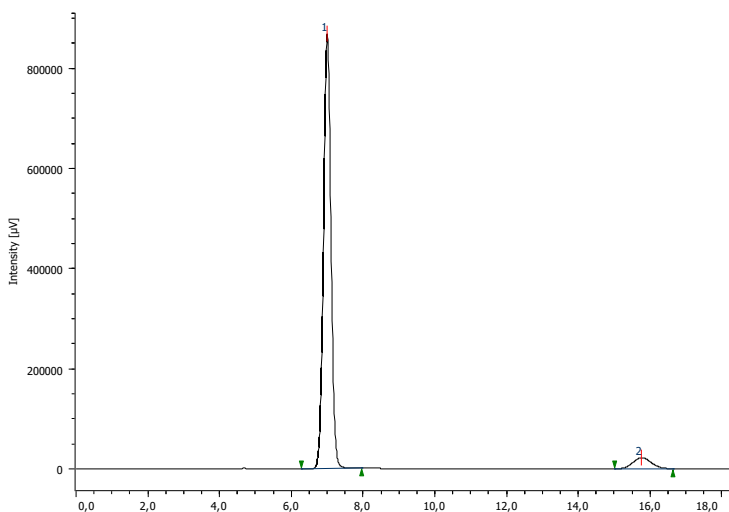

| # | $t_R$  | Area     | Height | Area%  | Height% | Resolution | Symmetry Factor |
|---|--------|----------|--------|--------|---------|------------|-----------------|
| 1 | 6,992  | 12440453 | 866077 | 94,029 | 97,512  | 13,280     | 1,031           |
| 2 | 15,750 | 789926   | 22095  | 5,971  | 2,488   | N/A        | 1,075           |

**(S)-3-((3,5-Dichlorophenyl)amino)-1-methyl-3-(phenylethynyl)indolin-2-one (7i).**

Phenomenex Lux Cellulose-1, hexane:2-propanol 80:20, 1 mL/min,  $\lambda = 254$  nm,  $t_R$  (major) = 6.3 min,  $t_R$  (minor) = 10.8 min.

Racemic sample

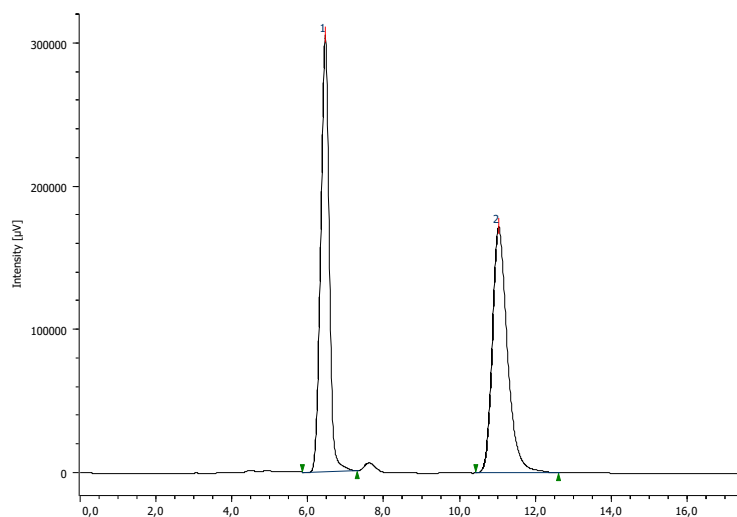

| # | $t_R$  | Area    | Height | Area%  | Height% | Resolution | Symmetry Factor |
|---|--------|---------|--------|--------|---------|------------|-----------------|
| 1 | 6,458  | 4680723 | 304415 | 49,712 | 63,947  | 8,432      | 0,949           |
| 2 | 11,017 | 4734868 | 171625 | 50,288 | 36,053  | N/A        | 1,351           |

Enantioselective reaction, er = 94:4

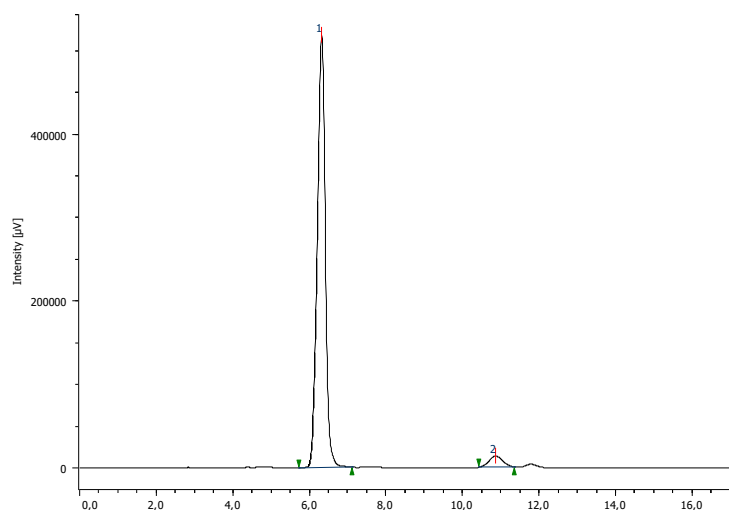

| # | $t_R$  | Area    | Height | Area%  | Height% | Resolution | Symmetry Factor |
|---|--------|---------|--------|--------|---------|------------|-----------------|
| 1 | 6,317  | 7543980 | 517030 | 95,734 | 97,490  | 8,604      | 0,940           |
| 2 | 10,850 | 336139  | 13312  | 4,266  | 2,510   | N/A        | 1,062           |

**(S)-3-((3,5-Dichlorophenyl)amino)-1-(methoxymethyl)-3-(phenylethynyl)indolin-2-one (7j).**

Phenomenex Lux Cellulose-1, hexane:2-propanol 80:20, 1 mL/min,  $\lambda = 254$  nm,  $t_R$  (major) = 6.4 min,  $t_R$  (minor) = 10.7 min.

Racemic sample

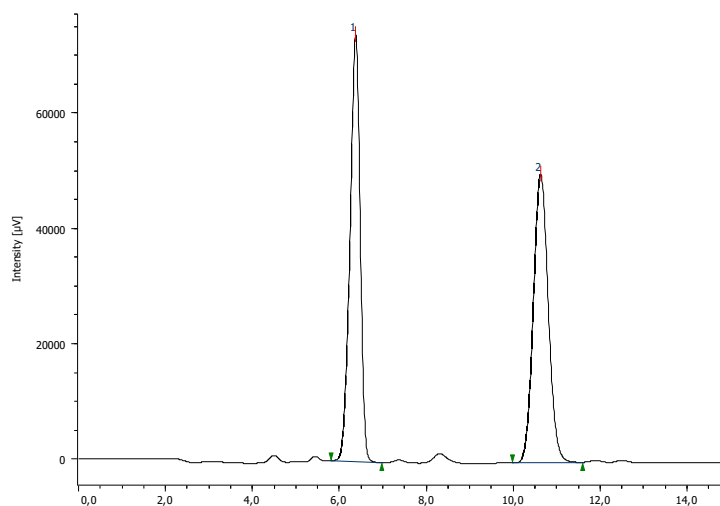

| # | $t_R$  | Area    | Height | Area%  | Height% | Resolution | Symmetry Factor |
|---|--------|---------|--------|--------|---------|------------|-----------------|
| 1 | 6,367  | 1203885 | 73895  | 50,270 | 59,664  | 8,097      | 0,884           |
| 2 | 10,617 | 1190946 | 49957  | 49,730 | 40,336  | N/A        | 1,073           |

Enantioselective reaction, er = 95:5

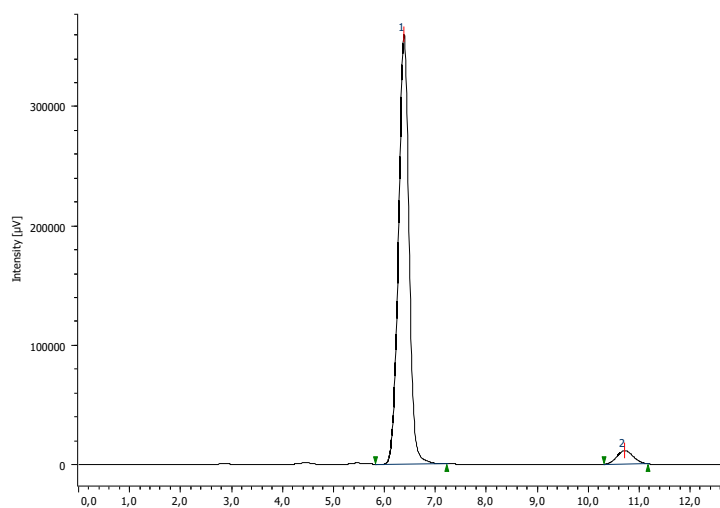

| # | $t_R$  | Area    | Height | Area%  | Height% | Resolution | Symmetry Factor |
|---|--------|---------|--------|--------|---------|------------|-----------------|
| 1 | 6,375  | 5148123 | 358976 | 95,345 | 96,959  | 8,959      | 0,986           |
| 2 | 10,708 | 251351  | 11257  | 4,655  | 3,041   | N/A        | 1,061           |

**(S)-3-((3,5-Dichlorophenyl)amino)-3-(phenylethynyl)-1-tritylindolin-2-one (7k).**

Phenomenex Lux Cellulose-1, hexane:2-propanol 83:17, 0.5 mL/min,  $\lambda = 254$  nm,  $t_R$  (major) = 8.6 min,  $t_R$  (minor) = 21.4 min.

Racemic sample

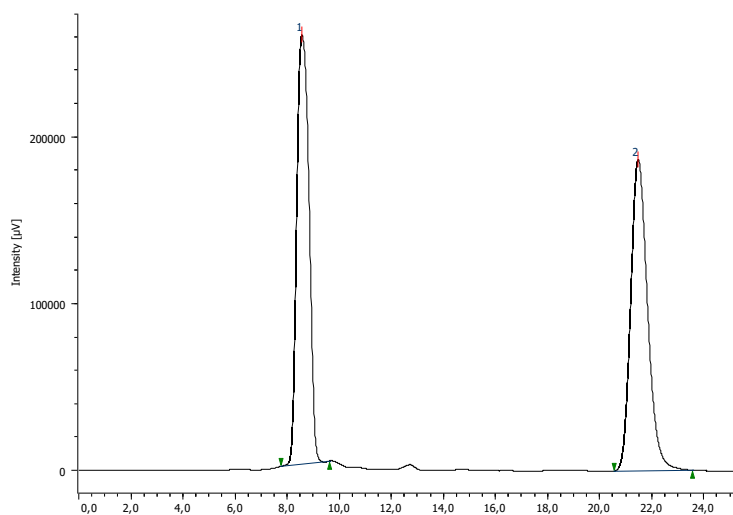

| # | $t_R$  | Area    | Height | Area%  | Height% | Resolution | Symmetry Factor |
|---|--------|---------|--------|--------|---------|------------|-----------------|
| 1 | 8,558  | 8410685 | 256691 | 50,236 | 57,959  | 12,469     | 1,160           |
| 2 | 21,458 | 8331615 | 186191 | 49,764 | 42,041  | N/A        | 1,223           |

Enantioselective reaction, er =87:13

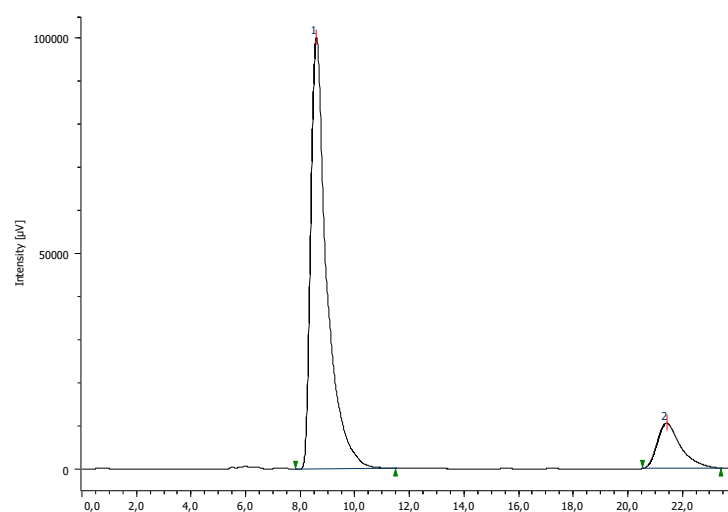

| # | $t_R$  | Area    | Height | Area%  | Height% | Resolution | Symmetry Factor |
|---|--------|---------|--------|--------|---------|------------|-----------------|
| 1 | 8,583  | 4044837 | 99705  | 86,713 | 90,540  | 10,755     | 2,016           |
| 2 | 21,392 | 619815  | 10418  | 13,287 | 9,460   | N/A        | 1,554           |

**(S)-1-(2,6-Dichlorobenzyl)-3-((3,5-dichlorophenyl)amino)-3-((2-(trifluoromethyl)phenyl)ethynyl)indolin-2-one (8a).**

Phenomenex Lux Cellulose-1, hexane:2-propanol 80:20, 1 mL/min,  $\lambda = 254$  nm,  $t_R$  (major) = 5.8 min,  $t_R$  (minor) = 7.6 min.

Racemic sample

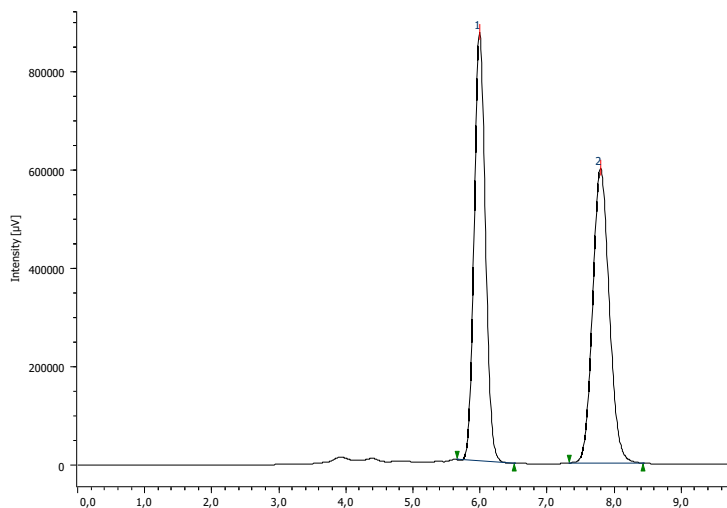

| # | $t_R$ | Area     | Height | Area%  | Height% | Resolution | Symmetry Factor |
|---|-------|----------|--------|--------|---------|------------|-----------------|
| 1 | 5,983 | 10201366 | 870823 | 49,785 | 59,264  | 4,750      | 1,092           |
| 2 | 7,783 | 10289537 | 598583 | 50,215 | 40,736  | N/A        | 1,129           |

Enantioselective reaction, er = 94:6

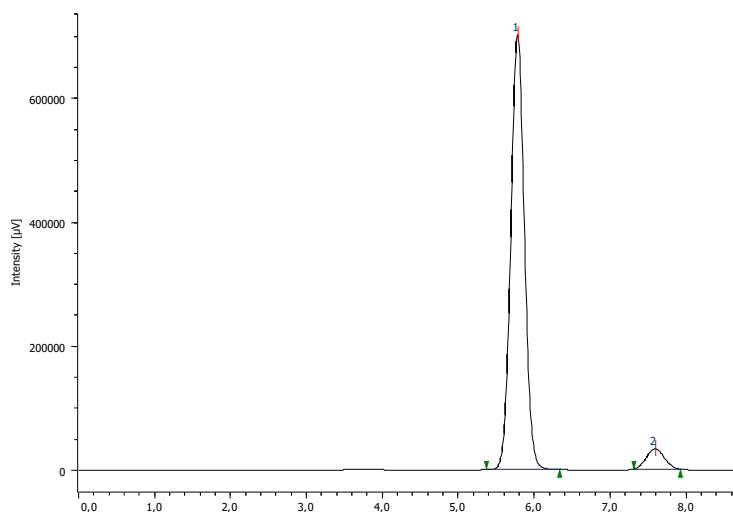

| # | $t_R$ | Area    | Height | Area%  | Height% | Resolution | Symmetry Factor |
|---|-------|---------|--------|--------|---------|------------|-----------------|
| 1 | 5,775 | 8713324 | 700493 | 94,159 | 95,549  | 4,681      | 1,027           |
| 2 | 7,583 | 540488  | 32628  | 5,841  | 4,451   | N/A        | 1,063           |



**(S)-1-(2,6-Dichlorobenzyl)-3-((3,5-dichlorophenyl)amino)-3-((2-fluorophenyl)ethynyl)indolin-2-one (8b).**

Phenomenex Lux Cellulose-1, hexane:2-propanol 80:20, 1 mL/min,  $\lambda = 254$  nm,  $t_R$  (major) = 8.4 min,  $t_R$  (minor) = 14.1 min.

Racemic sample

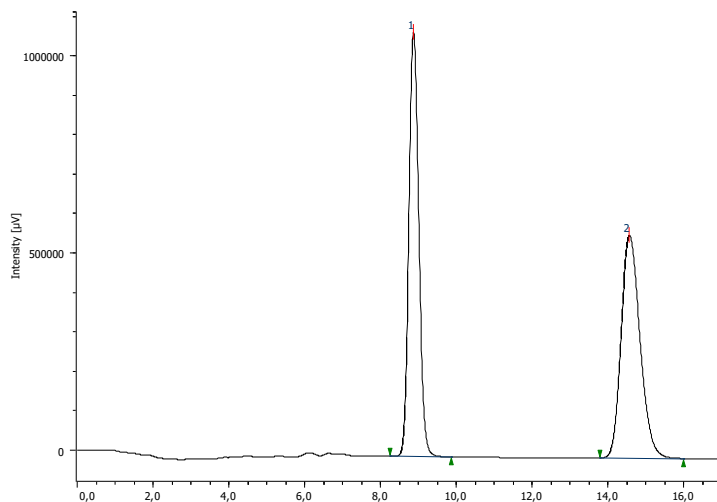

| # | $t_R$  | Area     | Height  | Area%  | Height% | Resolution | Symmetry Factor |
|---|--------|----------|---------|--------|---------|------------|-----------------|
| 1 | 8,867  | 19541723 | 1073631 | 50,194 | 65,617  | 8,246      | 1,091           |
| 2 | 14,550 | 19390631 | 562586  | 49,806 | 34,383  | N/A        | 1,223           |

Enantioselective reaction, er > 99%

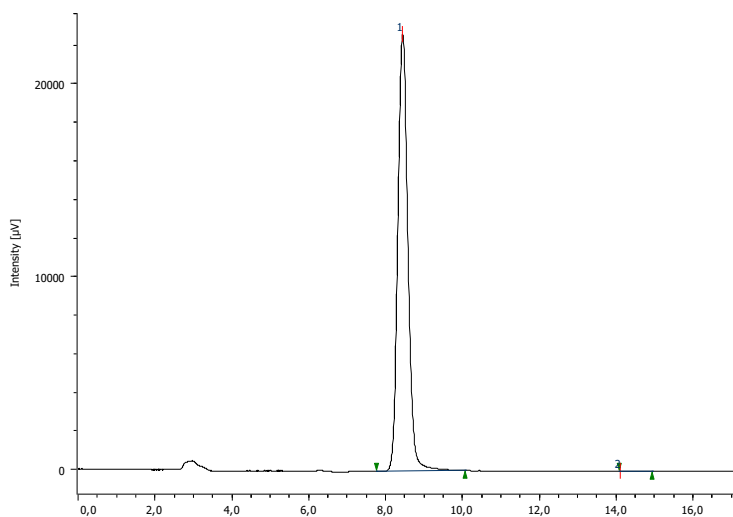

| # | $t_R$  | Area   | Height | Area%  | Height% | Resolution | Symmetry Factor |
|---|--------|--------|--------|--------|---------|------------|-----------------|
| 1 | 8,433  | 411476 | 22597  | 99,996 | 99,977  | 21,458     | 1,120           |
| 2 | 14,100 | 15     | 5      | 0,004  | 0,023   | N/A        | 8,228           |

**(S)-1-(2,6-Dichlorobenzyl)-3-((3,5-dichlorophenyl)amino)-3-((3-methoxyphenyl)ethynyl)indolin-2-one (8c).**

Phenomenex Lux Cellulose-1, hexane:2-propanol 80:20, 1 mL/min,  $\lambda = 254$  nm,  $t_R$  (major) = 11.1 min,  $t_R$  (minor) = 13.8 min.

Racemic sample

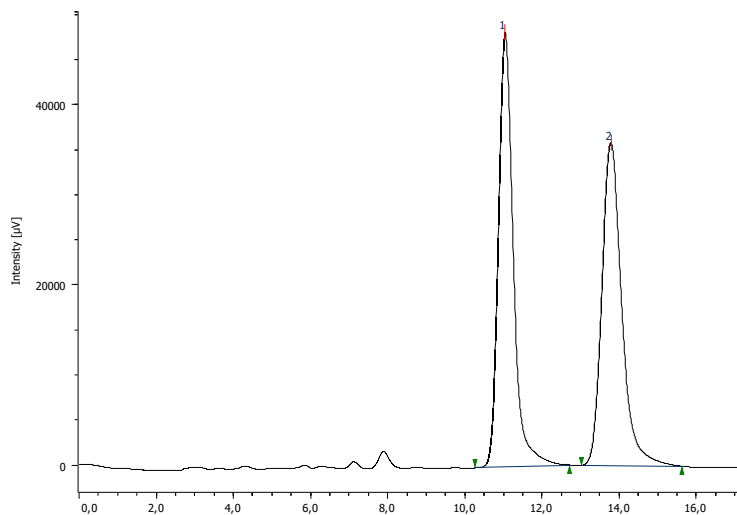

| # | $t_R$  | Area    | Height | Area%  | Height% | Resolution | Symmetry Factor |
|---|--------|---------|--------|--------|---------|------------|-----------------|
| 1 | 11,033 | 1289676 | 48099  | 50,364 | 57,376  | 3,514      | 1,262           |
| 2 | 13,767 | 1271013 | 35732  | 49,636 | 42,624  | N/A        | 1,274           |

Enantioselective reaction, er = 95:5

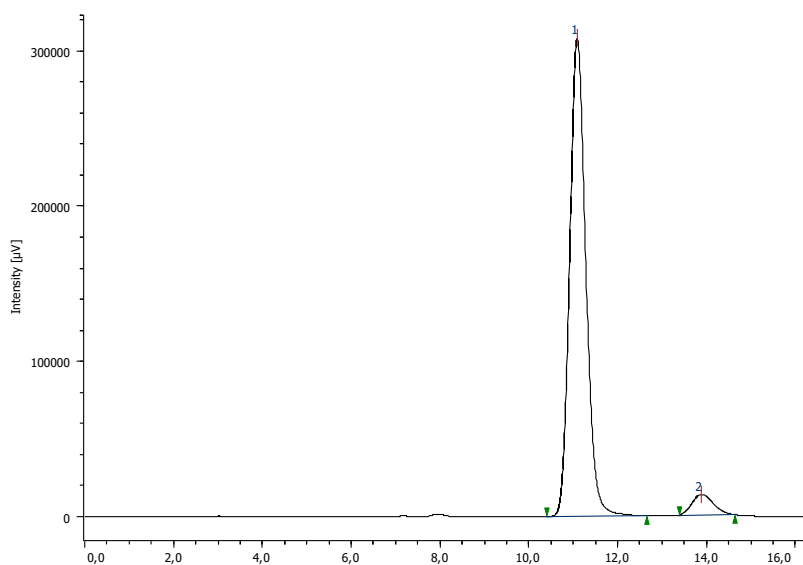

| # | $t_R$  | Area    | Height | Area%  | Height% | Resolution | Symmetry Factor |
|---|--------|---------|--------|--------|---------|------------|-----------------|
| 1 | 11,075 | 7754694 | 307253 | 94,610 | 95,881  | 3,619      | 1,149           |
| 2 | 13,875 | 441809  | 13198  | 5,390  | 4,119   | N/A        | 1,191           |

**(S)-1-(2,6-Dichlorobenzyl)-3-((3,5-dichlorophenyl)amino)-3-(m-tolyethynyl)indolin-2-one (8d).**

Phenomenex Lux Cellulose-1, hexane:2-propanol 80:20, 1 mL/min,  $\lambda = 254$  nm,  $t_R$  (major) = 9.2 min,  $t_R$  (minor) = 17.1 min.

Racemic sample

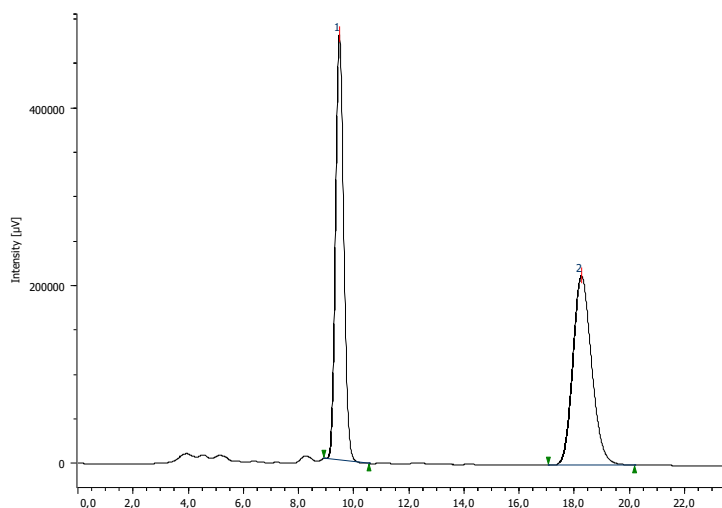

| # | $t_R$  | Area     | Height | Area%  | Height% | Resolution | Symmetry Factor |
|---|--------|----------|--------|--------|---------|------------|-----------------|
| 1 | 9,467  | 9899936  | 477822 | 49,600 | 69,192  | 9,845      | 1,125           |
| 2 | 18,233 | 10059431 | 212750 | 50,400 | 30,808  | N/A        | 1,178           |

Enantioselective reaction, er = 93:7

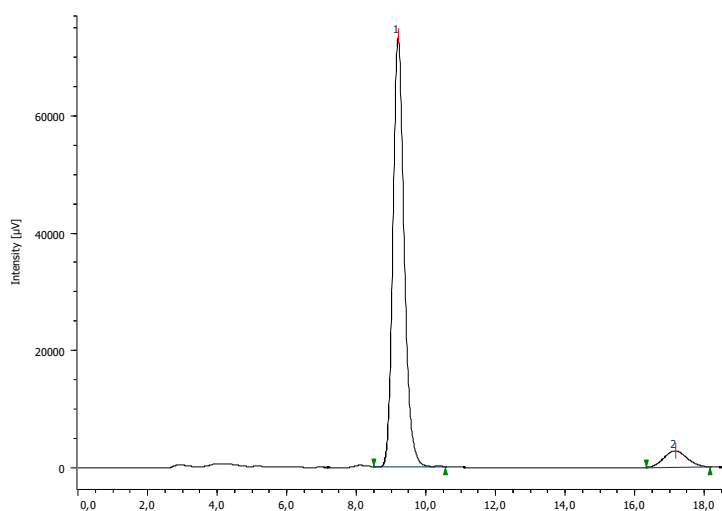

| # | $t_R$  | Area    | Height | Area%  | Height% | Resolution | Symmetry Factor |
|---|--------|---------|--------|--------|---------|------------|-----------------|
| 1 | 9,192  | 1634859 | 73101  | 92,729 | 96,322  | 8,869      | 1,186           |
| 2 | 17,142 | 128183  | 2791   | 7,271  | 3,678   | N/A        | 1,090           |

**(S)-3-((3-Chlorophenyl)ethynyl)-1-(2,6-dichlorobenzyl)-3-((3,5-dichlorophenyl)amino)indolin-2-one (8e).**

Phenomenex Lux Cellulose-1, hexane:2-propanol 90:10, 1 mL/min,  $\lambda = 254$  nm,  $t_R$  (major) = 13.3 min,  $t_R$  (minor) = 16.0 min.

Racemic sample

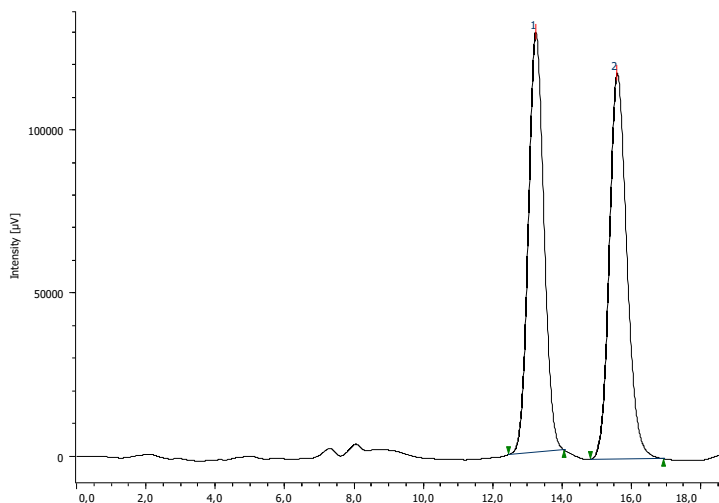

| # | $t_R$  | Area    | Height | Area%  | Height% | Resolution | Symmetry Factor |
|---|--------|---------|--------|--------|---------|------------|-----------------|
| 1 | 13,225 | 3987726 | 128500 | 49,076 | 52,091  | 2,718      | 1,079           |
| 2 | 15,567 | 4137903 | 118186 | 50,924 | 47,909  | N/A        | 1,185           |

Enantioselective reaction, er = 96:4

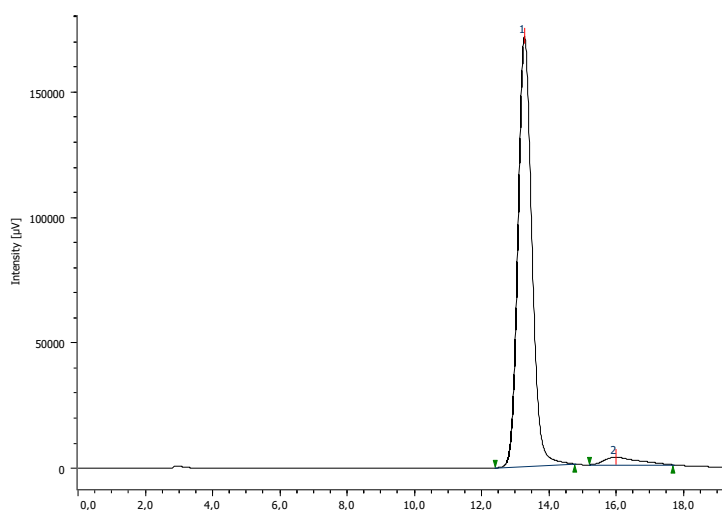

| # | $t_R$  | Area    | Height | Area%  | Height% | Resolution | Symmetry Factor |
|---|--------|---------|--------|--------|---------|------------|-----------------|
| 1 | 13,258 | 4929553 | 171233 | 95,820 | 98,254  | 2,049      | 1,128           |
| 2 | 15,967 | 215041  | 3043   | 4,180  | 1,746   | N/A        | 1,682           |

**(S)-1-(2,6-Dichlorobenzyl)-3-((3,5-dichlorophenyl)amino)-3-(p-tolylolethynyl)indolin-2-one (8f).**

Phenomenex Lux Cellulose-1, hexane:2-propanol 70:30, 1 mL/min,  $\lambda = 1$  nm,  $t_R$  (major) = 6.6 min,  $t_R$  (minor) = 9.0 min.

Racemic sample

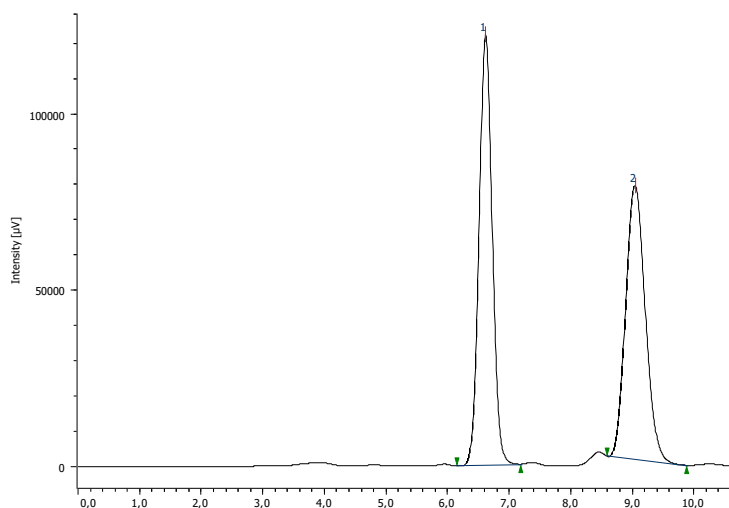

| # | $t_R$ | Area    | Height | Area%  | Height% | Resolution | Symmetry Factor |
|---|-------|---------|--------|--------|---------|------------|-----------------|
| 1 | 6,608 | 1813813 | 121777 | 51,432 | 61,127  | 4,981      | 1,043           |
| 2 | 9,033 | 1712839 | 77442  | 48,568 | 38,873  | N/A        | 1,118           |

Enantioselective reaction, er > 99%

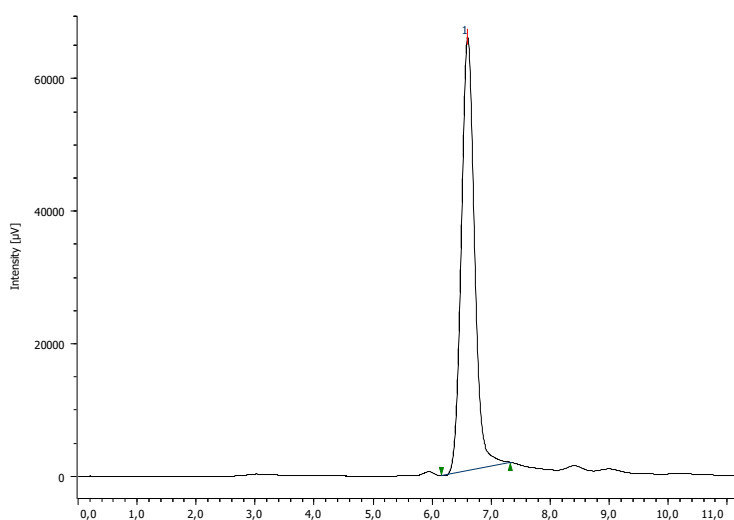

| # | $t_R$ | Area   | Height | Area%   | Height% | Resolution | Symmetry Factor |
|---|-------|--------|--------|---------|---------|------------|-----------------|
| 1 | 6,592 | 999769 | 65269  | 100,000 | 100,000 | N/A        | 1,130           |

**(S)-3-((4-Bromophenyl)ethynyl)-1-(2,6-dichlorobenzyl)-3-((3,5-dichlorophenyl)amino)indolin-2-one (8g).**

Phenomenex Lux Cellulose-1, hexane:2-propanol 90:10, 0.7 mL/min,  $\lambda = 254$  nm,  $t_R$  (major) = 20.0 min,  $t_R$  (minor) = 17.9 min.

Racemic sample

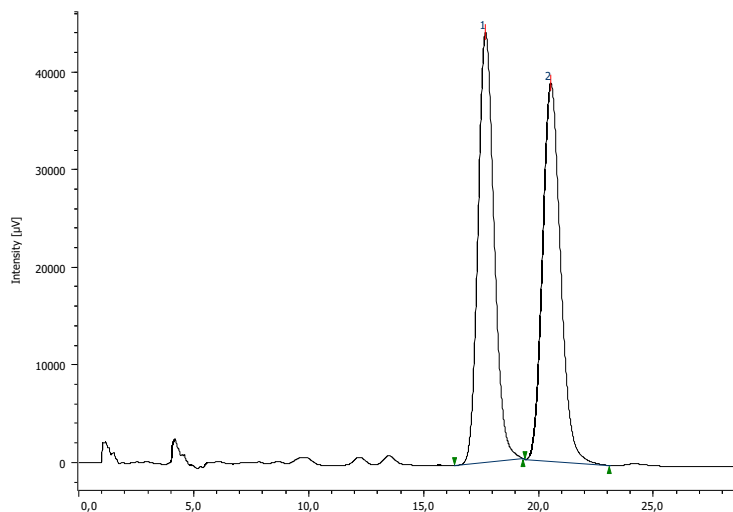

| # | $t_R$  | Area    | Height | Area%  | Height% | Resolution | Symmetry Factor |
|---|--------|---------|--------|--------|---------|------------|-----------------|
| 1 | 17,675 | 2123594 | 43922  | 50,190 | 53,192  | 2,127      | 1,158           |
| 2 | 20,517 | 2107517 | 38651  | 49,810 | 46,808  | N/A        | 1,162           |

Enantioselective reaction, er = 98:2

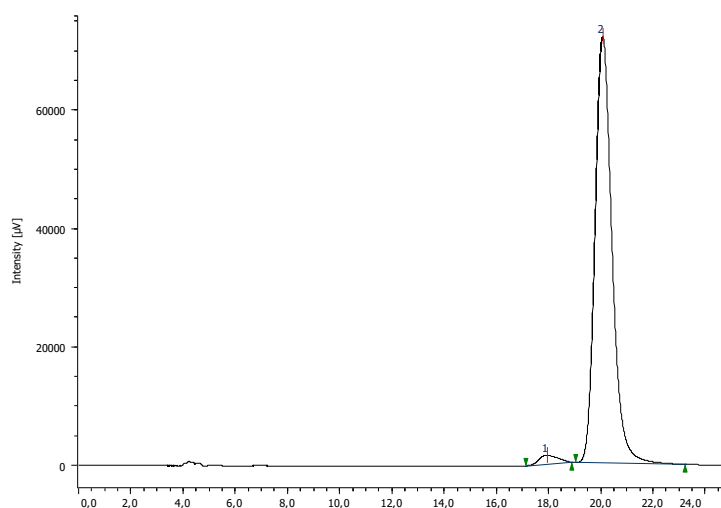

| # | $t_R$  | Area    | Height | Area%  | Height% | Resolution | Symmetry Factor |
|---|--------|---------|--------|--------|---------|------------|-----------------|
| 1 | 17,925 | 74360   | 1486   | 2,251  | 2,024   | 1,668      | 1,200           |
| 2 | 20,050 | 3229631 | 71922  | 97,749 | 97,976  | N/A        | 1,221           |

**(S)-1-(2,6-Dichlorobenzyl)-3-((3,5-dichlorophenyl)amino)-3-((4-(trifluoromethyl)phenyl)ethynyl)indolin-2-one (8h).**

Phenomenex Lux Cellulose-1, hexane:2-propanol 90:10, 1 mL/min,  $\lambda = 254 \text{ nm}$ ,  $t_R$  (major) = 16.2 min,  $t_R$  (minor) = 11.0 min.

Racemic sample

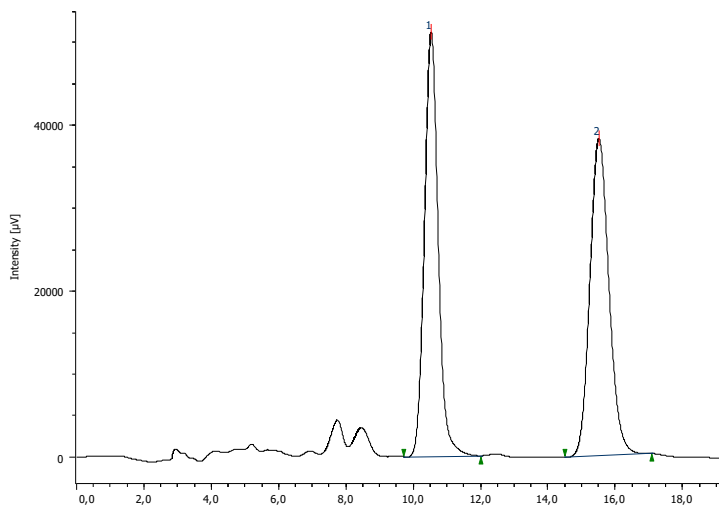

| # | $t_R$  | Area    | Height | Area%  | Height% | Resolution | Symmetry Factor |
|---|--------|---------|--------|--------|---------|------------|-----------------|
| 1 | 10,517 | 1443928 | 51005  | 49,164 | 57,224  | 5,716      | 1,111           |
| 2 | 15,492 | 1493058 | 38127  | 50,836 | 42,776  | N/A        | 1,135           |

Enantioselective reaction, er = 99:1

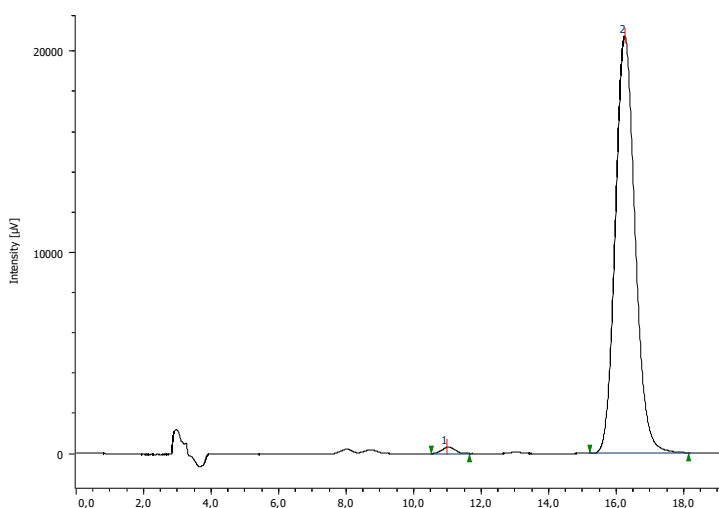

| # | $t_R$  | Area   | Height | Area%  | Height% | Resolution | Symmetry Factor |
|---|--------|--------|--------|--------|---------|------------|-----------------|
| 1 | 10,983 | 8807   | 322    | 1,042  | 1,533   | 5,891      | 1,139           |
| 2 | 16,233 | 836482 | 20679  | 98,958 | 98,467  | N/A        | 1,124           |

**Methyl (S)-4-((1-(2,6-dichlorobenzyl)-3-((3,5-dichlorophenyl)amino)-2-oxindolin-3-yl)ethynyl)benzoate (8i).**

Phenomenex Lux Cellulose-1, hexane:2-propanol 90:10, 1 mL/min,  $\lambda = 254 \text{ nm}$ ,  $t_R$  (major) = 24.1 min,  $t_R$  (minor) = 20.9 min.

Racemic sample

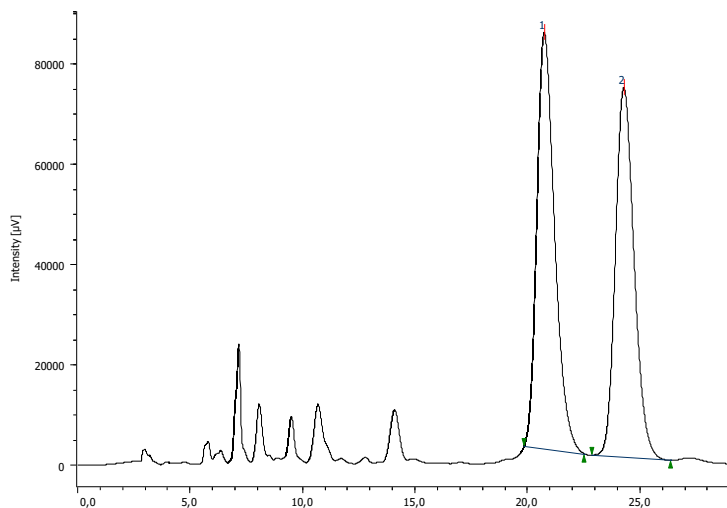

| # | $t_R$  | Area    | Height | Area%  | Height% | Resolution | Symmetry Factor |
|---|--------|---------|--------|--------|---------|------------|-----------------|
| 1 | 20,717 | 4568504 | 82894  | 51,810 | 52,956  | 2,409      | 1,334           |
| 2 | 24,250 | 4249266 | 73641  | 48,190 | 47,044  | N/A        | 1,194           |

Enantioselective reaction, er = 98:2

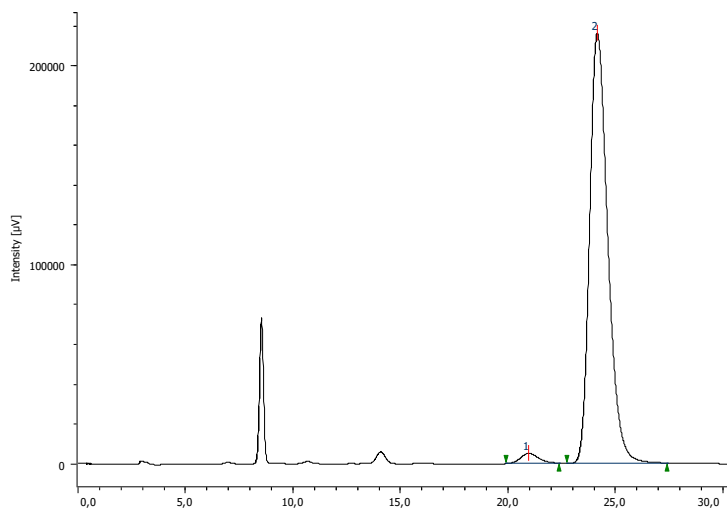

| # | $t_R$  | Area     | Height | Area%  | Height% | Resolution | Symmetry Factor |
|---|--------|----------|--------|--------|---------|------------|-----------------|
| 1 | 20,942 | 296135   | 5088   | 2,288  | 2,303   | 2,110      | 1,179           |
| 2 | 24,125 | 12647265 | 215823 | 97,712 | 97,697  | N/A        | 1,300           |



**(S)-1-(2,6-Dichlorobenzyl)-3-((3,5-dichlorophenyl)amino)-3-(4-phenylbut-1-yn-1-yl)indolin-2-one (8j).**

Phenomenex Lux Cellulose-2, hexane:2-propanol 95:5, 0.7 mL/min,  $\lambda = 254$  nm,  $t_R$  (major) = 15.7 min,  $t_R$  (minor) = 19.9 min.

Racemic sample

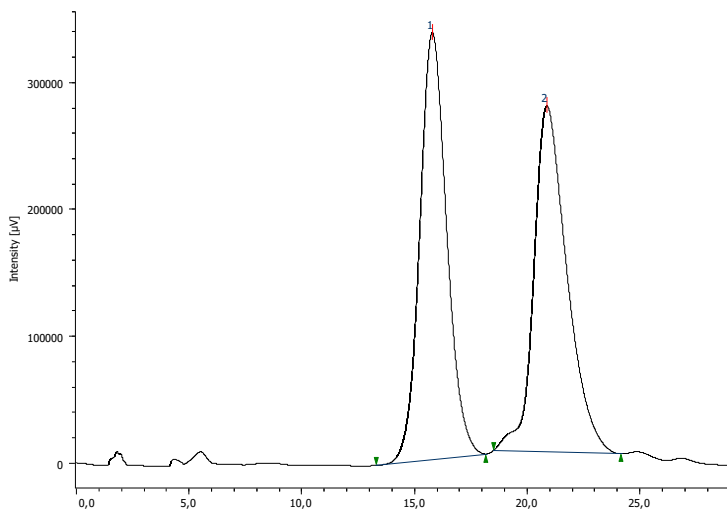

| # | $t_R$  | Area     | Height | Area%  | Height% | Resolution | Symmetry Factor |
|---|--------|----------|--------|--------|---------|------------|-----------------|
| 1 | 15,767 | 28060181 | 336226 | 50,224 | 55,238  | 2,156      | 1,114           |
| 2 | 20,850 | 27809571 | 272464 | 49,776 | 44,762  | N/A        | 1,167           |

Enantioselective reaction, er = 96:4

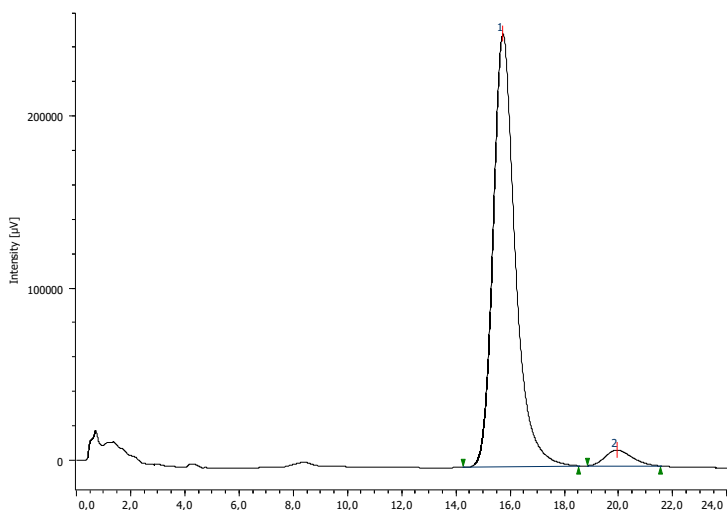

| # | $t_R$  | Area     | Height | Area%  | Height% | Resolution | Symmetry Factor |
|---|--------|----------|--------|--------|---------|------------|-----------------|
| 1 | 15,717 | 14219710 | 250674 | 95,720 | 96,487  | 2,578      | 1,298           |
| 2 | 19,917 | 635755   | 9128   | 4,280  | 3,513   | N/A        | 1,240           |

**(R)-1-(2,6-Dichlorobenzyl)-3-((3,5-dichlorophenyl)amino)-3-((trimethylsilyl)ethynyl)indolin-2-one (8k).**

Phenomenex Lux i-Amylose-3, hexane:2-propanol 80:20, 1 mL/min,  $\lambda = 254$  nm,  $t_R$  (major) = 16.2 min,  $t_R$  (minor) = 18.2 min.

Racemic sample

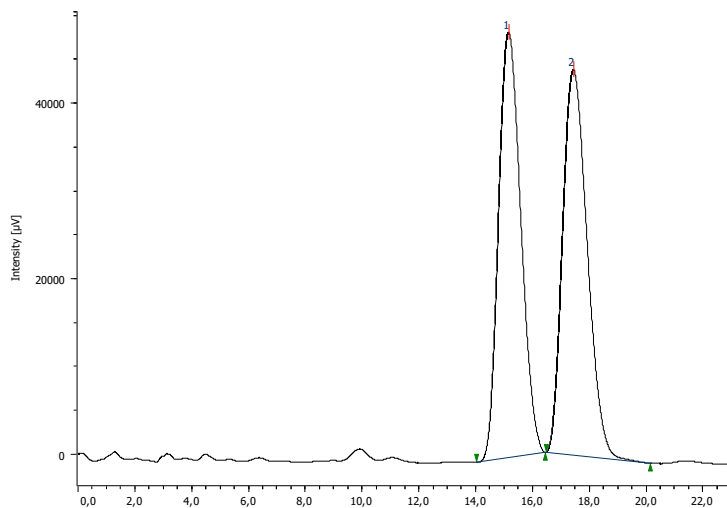

| # | $t_R$  | Area    | Height | Area%  | Height% | Resolution | Symmetry Factor |
|---|--------|---------|--------|--------|---------|------------|-----------------|
| 1 | 15,142 | 2626705 | 48404  | 49,992 | 52,430  | 1,489      | 1,186           |
| 2 | 17,417 | 2627495 | 43917  | 50,008 | 47,570  | N/A        | 1,256           |

Enantioselective reaction, er = 95:5

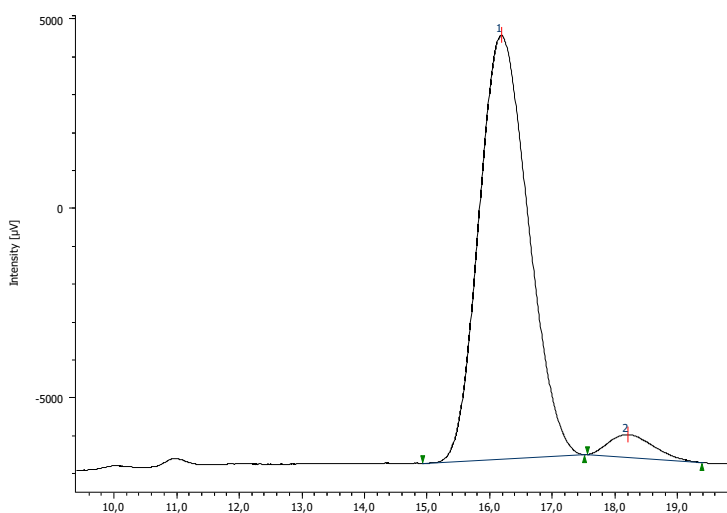

| # | $t_R$  | Area   | Height | Area%  | Height% | Resolution | Symmetry Factor |
|---|--------|--------|--------|--------|---------|------------|-----------------|
| 1 | 16,175 | 609809 | 11165  | 95,256 | 94,881  | 1,422      | 1,164           |
| 2 | 18,192 | 30372  | 602    | 4,744  | 5,119   | N/A        | 1,300           |

**(S)-3-(3-((*Tert*-butyldimethylsilyl)oxy)prop-1-yn-1-yl)-1-(2,6-dichlorobenzyl)-3-((3,5-dichlorophenyl)amino)indolin-2-one (8l).**

Phenomenex Lux i-Amylose-3, hexane:2-propanol 60:40, 1 mL/min,  $\lambda = 254$  nm,  $t_R$  (major) = 23.8 min,  $t_R$  (minor) = 12.3 min.

Racemic sample

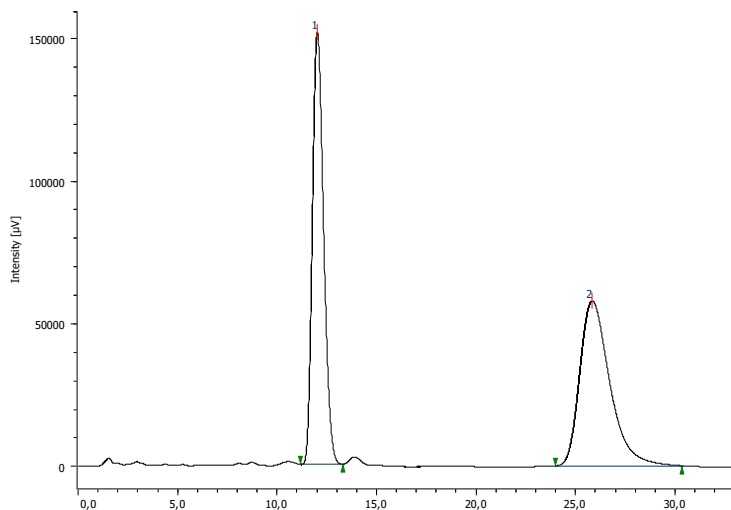

| # | $t_R$  | Area    | Height | Area%  | Height% | Resolution | Symmetry Factor |
|---|--------|---------|--------|--------|---------|------------|-----------------|
| 1 | 12,017 | 5900761 | 151125 | 49,448 | 72,353  | 7,464      | 1,209           |
| 2 | 25,800 | 6032620 | 57746  | 50,552 | 27,647  | N/A        | 1,440           |

Enantioselective reaction, er = 98:2

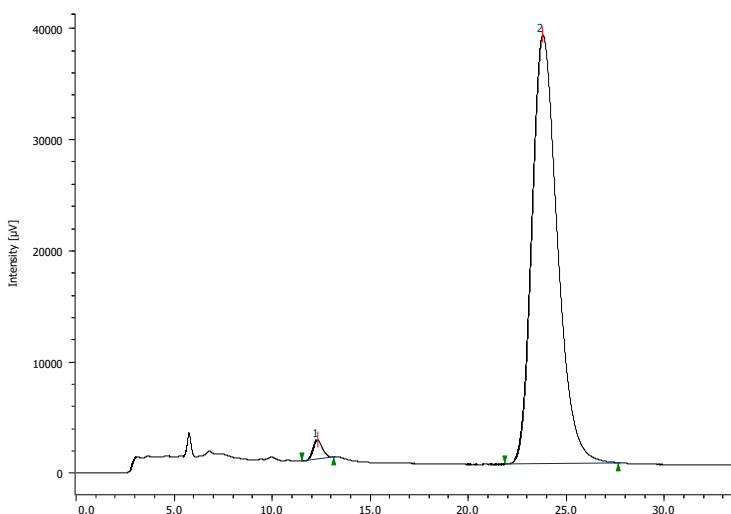

| # | $t_R$  | Area    | Height | Area%  | Height% | Resolution | Symmetry Factor |
|---|--------|---------|--------|--------|---------|------------|-----------------|
| 1 | 12,292 | 57886   | 1735   | 1,636  | 4,316   | 7,124      | 1,196           |
| 2 | 23,783 | 3479886 | 38475  | 98,364 | 95,684  | N/A        | 1,290           |

**(S)-1-(2,6-Dichlorobenzyl)-3-((3,5-dichlorophenyl)amino)-3-(oct-1-yn-1-yl)indolin-2-one (8m).**

Phenomenex Lux i-Amylose-1, hexane:2-propanol 70:30, 1 mL/min,  $\lambda = 254$  nm,  $t_R$  (major) = 28.8 min,  $t_R$  (minor) = 14.6 min.

Racemic sample

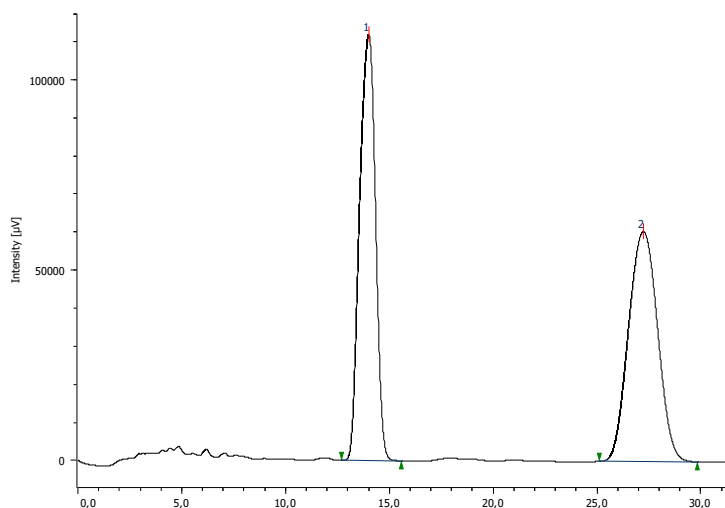

| # | $t_R$  | Area    | Height | Area%  | Height% | Resolution | Symmetry Factor |
|---|--------|---------|--------|--------|---------|------------|-----------------|
| 1 | 13,992 | 5907090 | 111577 | 50,083 | 64,910  | 6,398      | 0,936           |
| 2 | 27,208 | 5887527 | 60318  | 49,917 | 35,090  | N/A        | 1,019           |

Enantioselective reaction, er = 94:6

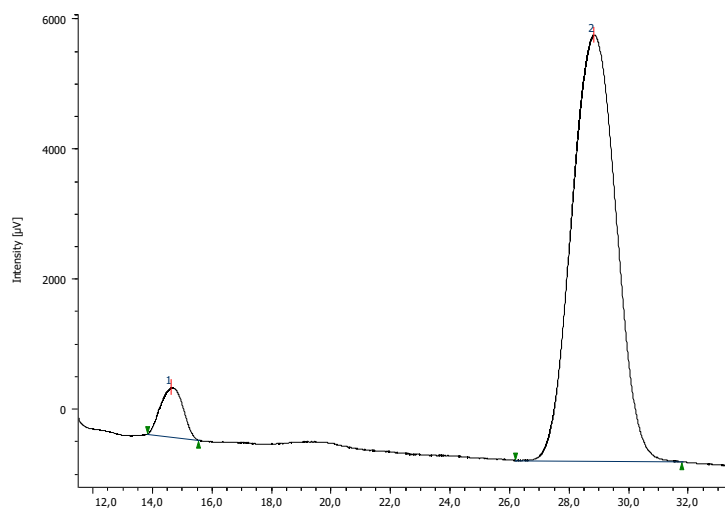

| # | $t_R$  | Area   | Height | Area%  | Height% | Resolution | Symmetry Factor |
|---|--------|--------|--------|--------|---------|------------|-----------------|
| 1 | 14,633 | 39832  | 755    | 5,562  | 10,348  | 6,582      | 1,014           |
| 2 | 28,808 | 676306 | 6538   | 94,438 | 89,652  | N/A        | 1,036           |

**(S)-3-(4-Bromobut-1-yn-1-yl)-1-(2,6-dichlorobenzyl)-3-((3,5-dichlorophenyl)amino)indolin-2-one (8n).**

Phenomenex Lux Cellulose-1, hexane:2-propanol 80:20, 1 mL/min,  $\lambda = 254$  nm,  $t_R$  (major) = 8.9 min,  $t_R$  (minor) = 10.9 min.

Racemic sample:

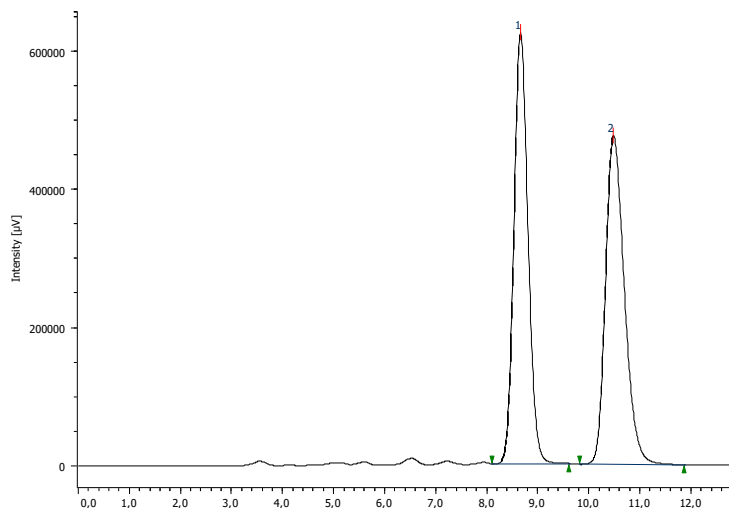

| # | $t_R$  | Area     | Height | Area%  | Height% | Resolution | Symmetry Factor |
|---|--------|----------|--------|--------|---------|------------|-----------------|
| 1 | 8,650  | 11979540 | 622659 | 49,655 | 56,741  | 3,115      | 1,112           |
| 2 | 10,467 | 12146161 | 474703 | 50,345 | 43,259  | N/A        | 1,294           |

Enantioselective compound, er = 94:6

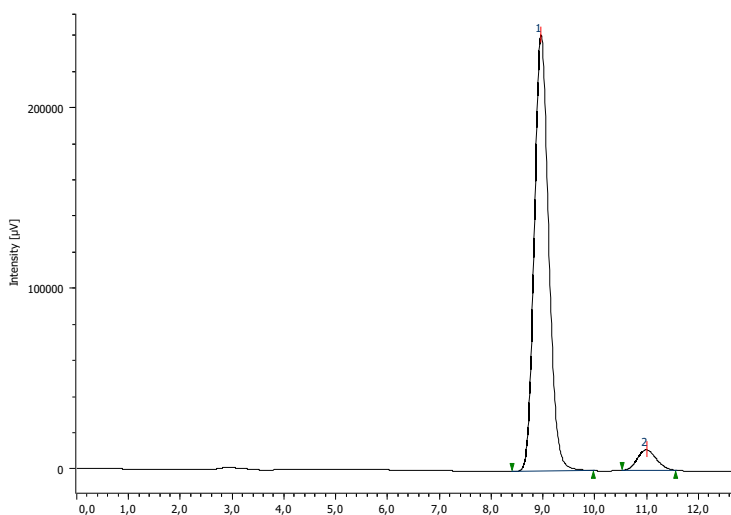

| # | $t_R$  | Area    | Height | Area%  | Height% | Resolution | Symmetry Factor |
|---|--------|---------|--------|--------|---------|------------|-----------------|
| 1 | 8,950  | 4664270 | 240932 | 94,134 | 95,508  | 3,429      | 1,142           |
| 2 | 10,983 | 290645  | 11333  | 5,866  | 4,492   | N/A        | 1,113           |

**(S)-1-(2,6-Dichlorobenzyl)-3-((3,5-dichlorophenyl)amino)-3-(3,3-dimethylbut-1-yn-1-yl)indolin-2-one (8o).**

Phenomenex Lux i-Amylose-1, hexane:2-propanol 90:10, 0.7 mL/min,  $\lambda = 254$  nm,  $t_R$  (major) = 28.7 min,  $t_R$  (minor) = 25.1 min.

Racemic sample

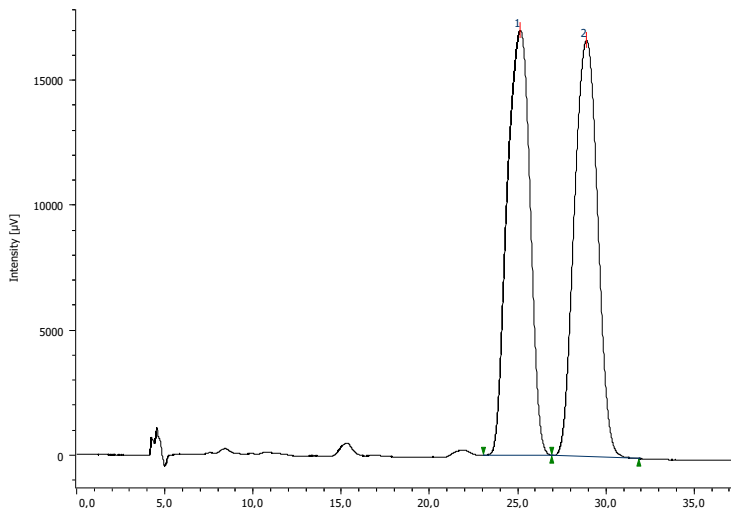

| # | $t_R$  | Area    | Height | Area%  | Height% | Resolution | Symmetry Factor |
|---|--------|---------|--------|--------|---------|------------|-----------------|
| 1 | 25,108 | 1521444 | 16953  | 49,907 | 50,485  | 1,481      | 0,934           |
| 2 | 28,858 | 1527128 | 16627  | 50,093 | 49,515  | N/A        | 1,012           |

Enantioselective reaction, er = 89:11

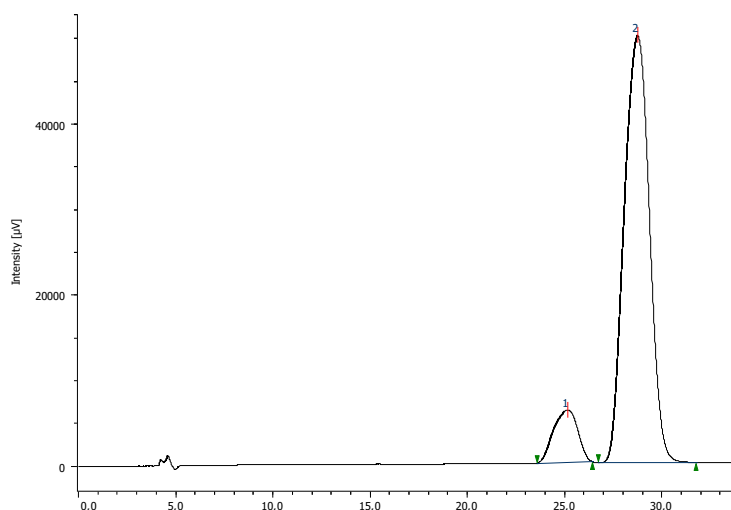

| # | $t_R$  | Area    | Height | Area%  | Height% | Resolution | Symmetry Factor |
|---|--------|---------|--------|--------|---------|------------|-----------------|
| 1 | 25,125 | 529296  | 6120   | 10,584 | 10,932  | 1,455      | 0,901           |
| 2 | 28,717 | 4471380 | 49864  | 89,416 | 89,068  | N/A        | 1,010           |

**(S)-1-(2,6-Dichlorobenzyl)-3-((3,5-dichlorophenyl)amino)-5-fluoro-3-(phenylethynyl)indolin-2-one (9a).**

Phenomenex Lux Cellulose-1, hexane:2-propanol 80:20, 1 mL/min,  $\lambda = 254$  nm,  $t_R$  (major) = 8.4 min,  $t_R$  (minor) = 17.9 min.

Racemic sample

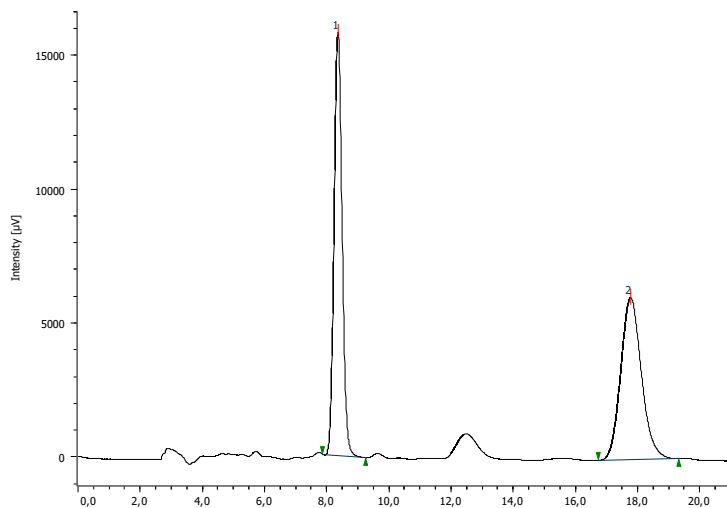

| # | $t_R$  | Area   | Height | Area%  | Height% | Resolution | Symmetry Factor |
|---|--------|--------|--------|--------|---------|------------|-----------------|
| 1 | 8,350  | 282360 | 15761  | 50,330 | 72,303  | 11,262     | 1,094           |
| 2 | 17,750 | 278654 | 6038   | 49,670 | 27,697  | N/A        | 1,145           |

Enantioselective reaction, er > 99:1

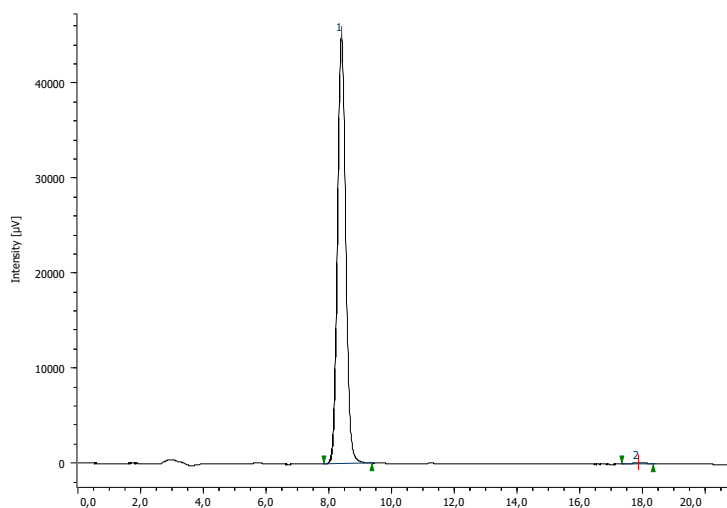

| # | $t_R$  | Area   | Height | Area%  | Height% | Resolution | Symmetry Factor |
|---|--------|--------|--------|--------|---------|------------|-----------------|
| 1 | 8,392  | 826169 | 45057  | 99,570 | 99,767  | 12,865     | 1,085           |
| 2 | 17,867 | 3571   | 105    | 0,430  | 0,233   | N/A        | 0,901           |

**(S)-5-Chloro-1-(2,6-dichlorobenzyl)-3-((3,5-dichlorophenyl)amino)-3-(phenylethynyl)indolin-2-one (9b).**

Phenomenex Lux Cellulose-1, hexane:2-propanol 80:20, 1 mL/min,  $\lambda = 254$  nm,  $t_R$  (major) = 9.1 min,  $t_R$  (minor) = 14.6 min.

Racemic sample

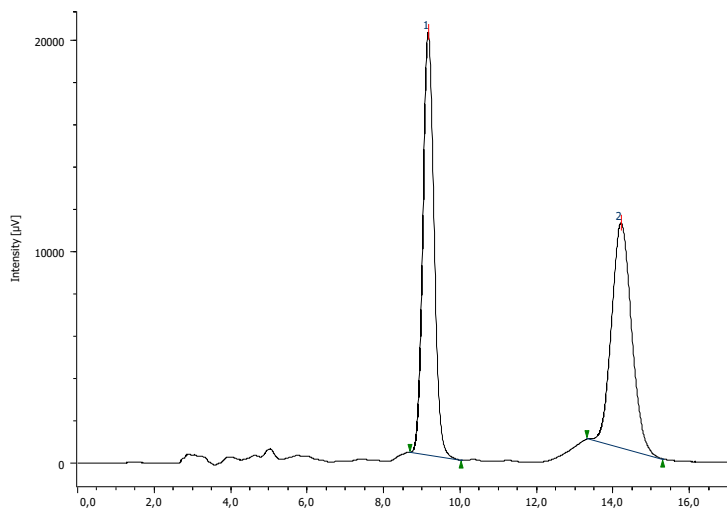

| # | $t_R$  | Area   | Height | Area%  | Height% | Resolution | Symmetry Factor |
|---|--------|--------|--------|--------|---------|------------|-----------------|
| 1 | 9,158  | 403248 | 19940  | 51,076 | 65,274  | 6,784      | 1,081           |
| 2 | 14,192 | 386261 | 10608  | 48,924 | 34,726  | N/A        | 1,102           |

Enantioselective reaction, er > 99:1

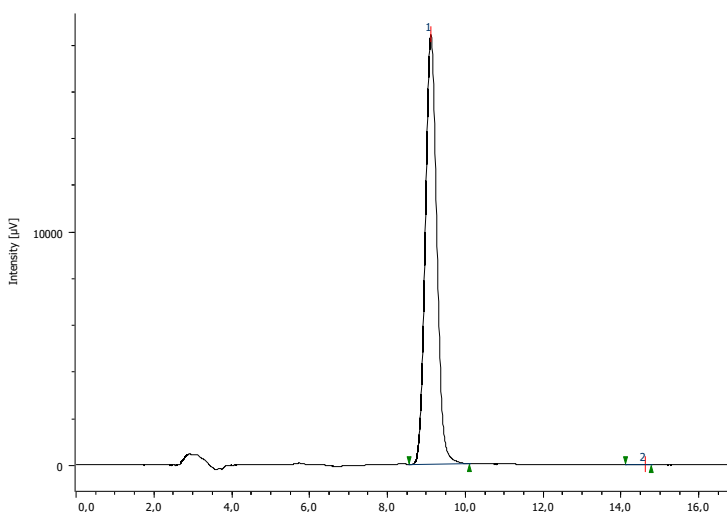

| # | $t_R$  | Area   | Height | Area%  | Height% | Resolution | Symmetry Factor |
|---|--------|--------|--------|--------|---------|------------|-----------------|
| 1 | 9,100  | 372318 | 18351  | 99,972 | 99,970  | 8,573      | 1,103           |
| 2 | 14,608 | 103    | 5      | 0,028  | 0,030   | N/A        | 0,607           |



**(S)-5-Bromo-1-(2,6-dichlorobenzyl)-3-((3,5-dichlorophenyl)amino)-3-(phenylethynyl)indolin-2-one (9c).**

Phenomenex Lux Cellulose-1, hexane:2-propanol 80:20, 1 mL/min,  $\lambda = 254 \text{ nm}$ ,  $t_R$  (major) = 10.2 min,  $t_R$  (minor) = 14.9 min.

Racemic sample

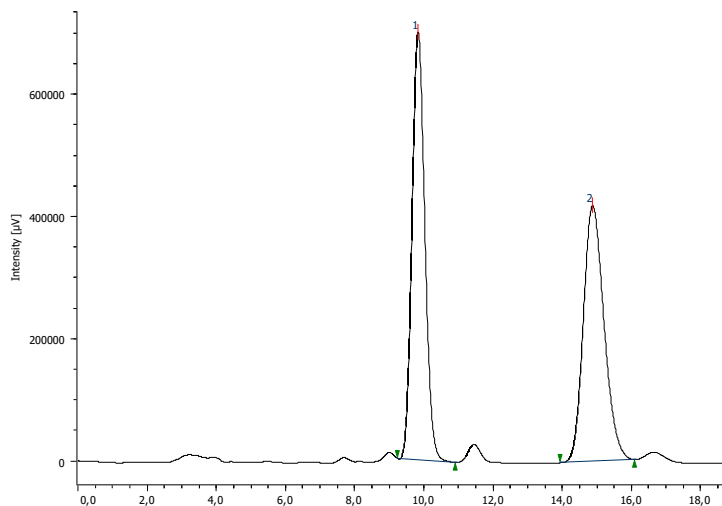

| # | $t_R$  | Area     | Height | Area%  | Height% | Resolution | Symmetry Factor |
|---|--------|----------|--------|--------|---------|------------|-----------------|
| 1 | 9,817  | 17957244 | 698342 | 50,782 | 62,553  | 5,700      | 1,129           |
| 2 | 14,858 | 17404495 | 418056 | 49,218 | 37,447  | N/A        | 1,198           |

Enantioselective reaction, er > 99:1

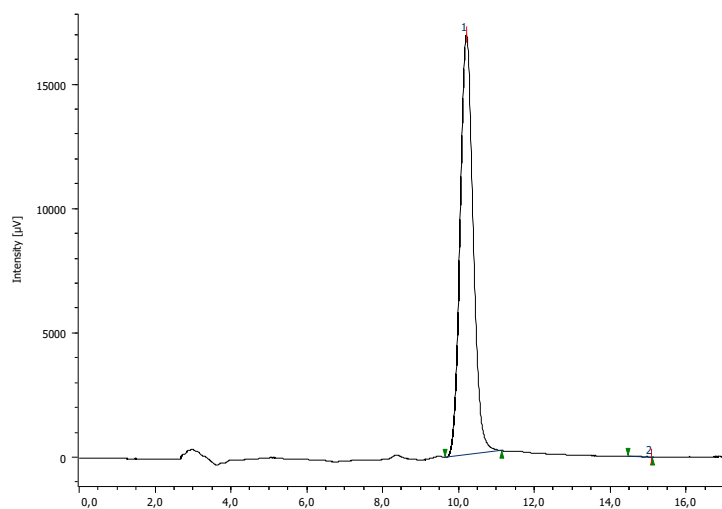

| # | $t_R$  | Area   | Height | Area%  | Height% | Resolution | Symmetry Factor |
|---|--------|--------|--------|--------|---------|------------|-----------------|
| 1 | 10,200 | 404058 | 16859  | 99,987 | 99,995  | N/A        | 1,105           |
| 2 | 15,075 | 51     | 1      | 0,013  | 0,005   | N/A        | N/A             |

**(S)-1-(2,6-Dichlorobenzyl)-3-((3,5-dichlorophenyl)amino)-5-methyl-3-(phenylethynyl)indolin-2-one (9d).**

Phenomenex Lux Cellulose-1, hexane:2-propanol 80:20, 1 mL/min,  $\lambda = 254$  nm,  $t_R$  (major) = 7.7 min,  $t_R$  (minor) = 12.7 min.

Racemic sample

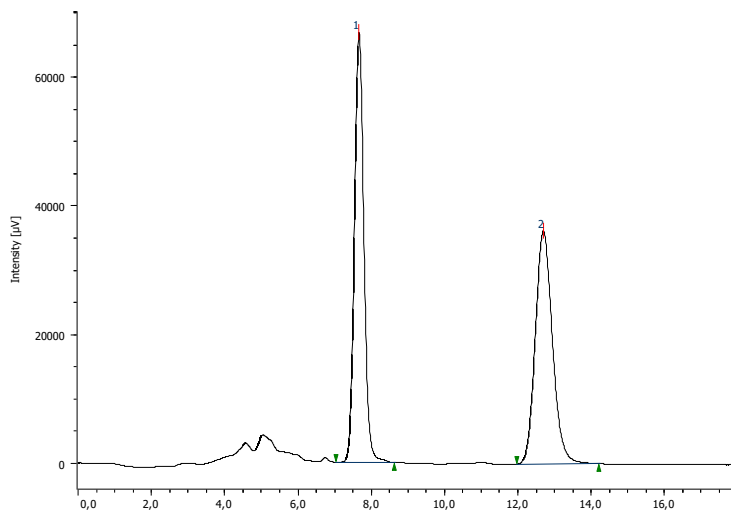

| # | $t_R$  | Area    | Height | Area%  | Height% | Resolution | Symmetry Factor |
|---|--------|---------|--------|--------|---------|------------|-----------------|
| 1 | 7,650  | 1195414 | 66723  | 50,379 | 64,845  | 7,709      | 1,100           |
| 2 | 12,675 | 1177430 | 36173  | 49,621 | 35,155  | N/A        | 1,152           |

Enantioselective reaction, er > 99:1

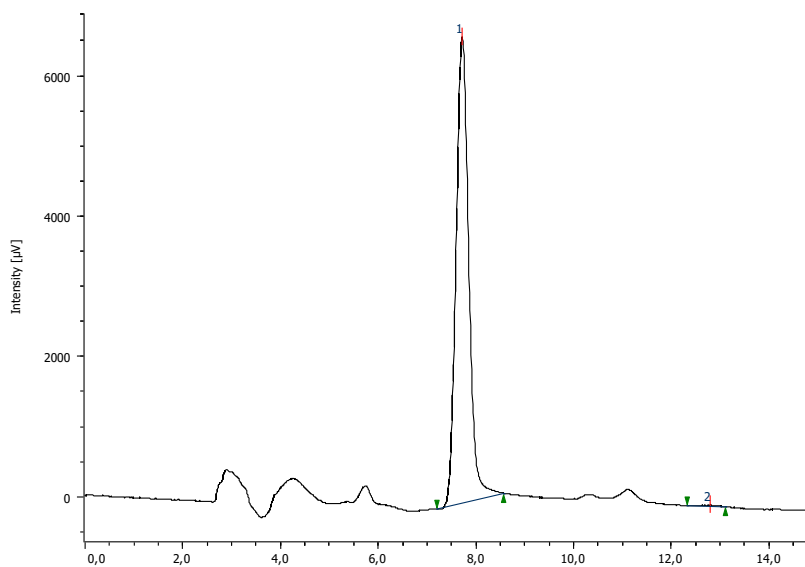

| # | $t_R$  | Area   | Height | Area%  | Height% | Resolution | Symmetry Factor |
|---|--------|--------|--------|--------|---------|------------|-----------------|
| 1 | 7,708  | 119781 | 6631   | 99,763 | 99,763  | 9,651      | 1,120           |
| 2 | 12,767 | 284    | 16     | 0,237  | 0,237   | N/A        | 0,822           |

**(S)-1-(2,6-Dichlorobenzyl)-3-((3,5-dichlorophenyl)amino)-5-methoxy-3-(phenylethynyl)indolin-2-one (9e).**

Phenomenex Lux Cellulose-1, hexane:2-propanol 80:20, 1 mL/min,  $\lambda = 254$  nm,  $t_R$  (major) = 9.6 min,  $t_R$  (minor) = 15.7 min.

Racemic sample

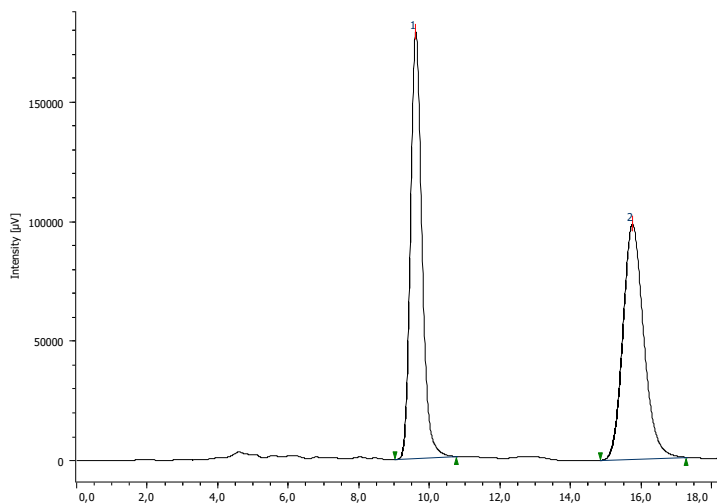

| # | $t_R$  | Area    | Height | Area%  | Height% | Resolution | Symmetry Factor |
|---|--------|---------|--------|--------|---------|------------|-----------------|
| 1 | 9,600  | 4030540 | 177973 | 50,151 | 64,448  | 7,524      | 1,196           |
| 2 | 15,733 | 4006327 | 98176  | 49,849 | 35,552  | N/A        | 1,202           |

Enantioselective reaction, er = 93:7

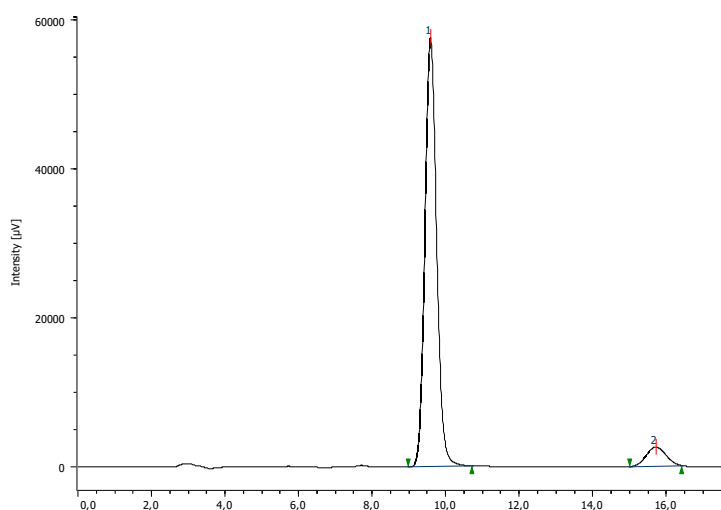

| # | $t_R$  | Area    | Height | Area%  | Height% | Resolution | Symmetry Factor |
|---|--------|---------|--------|--------|---------|------------|-----------------|
| 1 | 9,575  | 1263982 | 57407  | 92,914 | 95,728  | 7,731      | 1,109           |
| 2 | 15,700 | 96395   | 2562   | 7,086  | 4,272   | N/A        | 1,021           |

**(S)-1-(2,6-Dichlorobenzyl)-3-((3,5-dichlorophenyl)amino)-5-nitro-3-(phenylethynyl)indolin-2-one (9f).**

Phenomenex Lux Cellulose-1, hexane:2-propanol 70:30, 1 mL/min,  $\lambda = 254 \text{ nm}$ ,  $t_R$  (major) = 20.0 min,  $t_R$  (minor) = 16.0 min.

Racemic sample

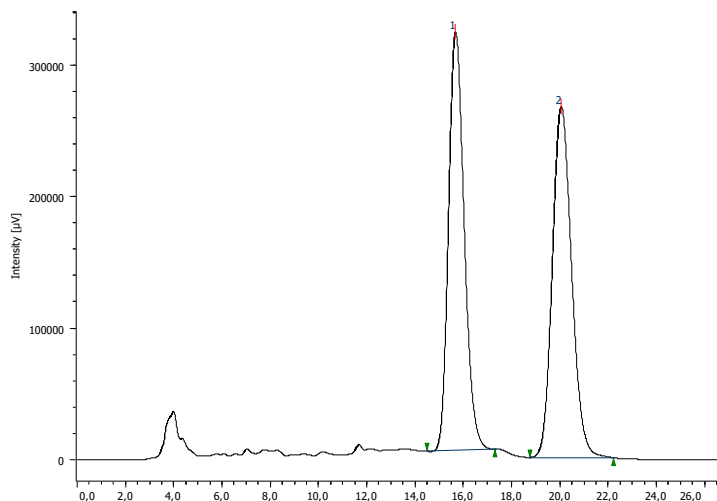

| # | $t_R$  | Area     | Height | Area%  | Height% | Resolution | Symmetry Factor |
|---|--------|----------|--------|--------|---------|------------|-----------------|
| 1 | 15,658 | 14233286 | 317107 | 49,216 | 54,391  | 3,346      | 1,204           |
| 2 | 20,033 | 14686472 | 265910 | 50,784 | 45,609  | N/A        | 1,141           |

Enantioselective reaction, er = 89:11

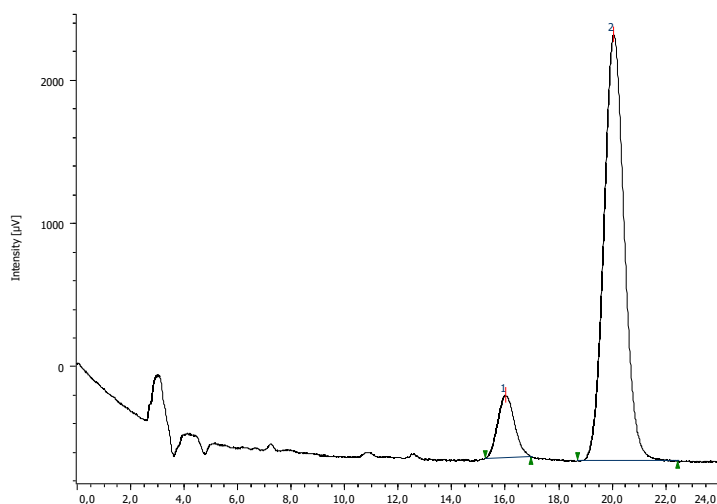

| # | $t_R$  | Area   | Height | Area%  | Height% | Resolution | Symmetry Factor |
|---|--------|--------|--------|--------|---------|------------|-----------------|
| 1 | 15,983 | 19004  | 434    | 10,796 | 12,757  | 3,173      | 1,165           |
| 2 | 20,025 | 157020 | 2969   | 89,204 | 87,243  | N/A        | 1,089           |

**(S)-1-(2,6-Dichlorobenzyl)-3-((3,5-dichlorophenyl)amino)-7-methyl-3-(phenylethynyl)indolin-2-one (9g).**

Phenomenex Lux Cellulose-1, hexane:2-propanol 80:20, 1 mL/min,  $\lambda = 254$  nm,  $t_R$  (major) = 12.8 min,  $t_R$  (minor) = 26.0 min.

Racemic sample

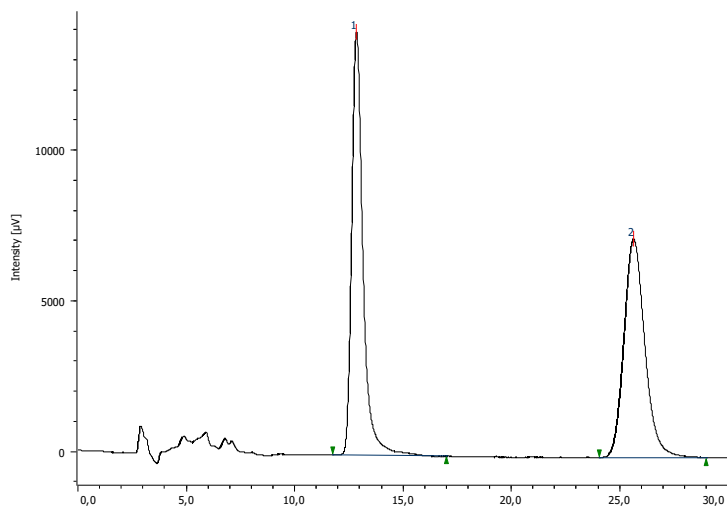

| # | $t_R$  | Area   | Height | Area%  | Height% | Resolution | Symmetry Factor |
|---|--------|--------|--------|--------|---------|------------|-----------------|
| 1 | 12,842 | 501165 | 13992  | 50,765 | 65,927  | 9,909      | 1,421           |
| 2 | 25,617 | 486064 | 7232   | 49,235 | 34,073  | N/A        | 1,183           |

Enantioselective reaction, er = 99:1

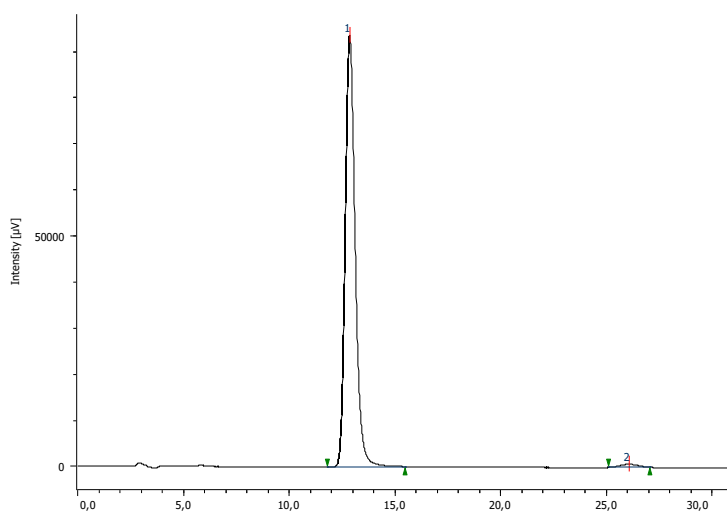

| # | $t_R$  | Area    | Height | Area%  | Height% | Resolution | Symmetry Factor |
|---|--------|---------|--------|--------|---------|------------|-----------------|
| 1 | 12,850 | 3026876 | 93399  | 98,736 | 99,287  | 10,864     | 1,229           |
| 2 | 26,042 | 38734   | 671    | 1,264  | 0,713   | N/A        | 1,021           |

**(S)-5-chloro-1-(2,6-dichlorobenzyl)-3-((3,5-dichlorophenyl)amino)-3-((2-fluorophenyl)ethynyl)indolin-2-one (9h).**

Phenomenex Lux Cellulose-1, hexane:2-propanol 80:20, 1 mL/min,  $\lambda = 254 \text{ nm}$ ,  $t_R$  (major) = 11.2 min,  $t_R$  (minor) = 19.6 min.

Racemic sample

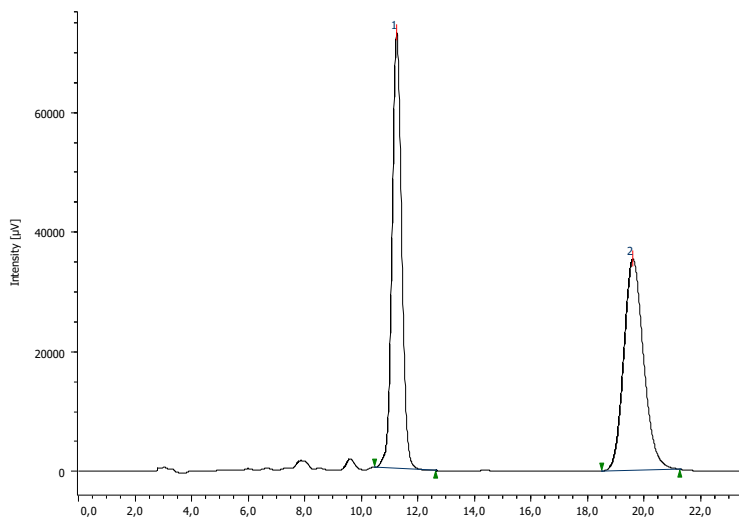

| # | $t_R$  | Area    | Height | Area%  | Height% | Resolution | Symmetry Factor |
|---|--------|---------|--------|--------|---------|------------|-----------------|
| 1 | 11,242 | 1725349 | 72693  | 50,017 | 67,314  | 8,870      | 1,061           |
| 2 | 19,583 | 1724188 | 35299  | 49,983 | 32,686  | N/A        | 1,177           |

Enantioselective reaction, er > 99:1

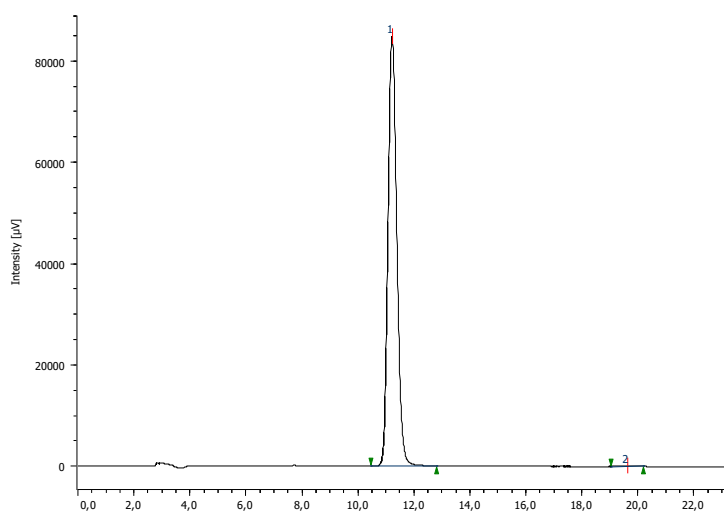

| # | $t_R$  | Area    | Height | Area%  | Height% | Resolution | Symmetry Factor |
|---|--------|---------|--------|--------|---------|------------|-----------------|
| 1 | 11,208 | 1875118 | 84601  | 99,815 | 99,893  | 9,895      | 1,151           |
| 2 | 19,600 | 3481    | 90     | 0,185  | 0,107   | N/A        | 0,979           |

**(S)-3-(3-((Tert-butyl dimethylsilyl)oxy)prop-1-yn-1-yl)-5-chloro-1-(2,6-dichlorobenzyl)-3-((3,5-dichlorophenyl)amino)indolin-2-one (9i).**

Phenomenex Lux i-Amylose-3, hexane:2-propanol 60:40, 1 mL/min,  $\lambda = 254 \text{ nm}$ ,  $t_R$  (major) = 16.8 min,  $t_R$  (minor) = 10.5 min.

Racemic sample, er = 95:5

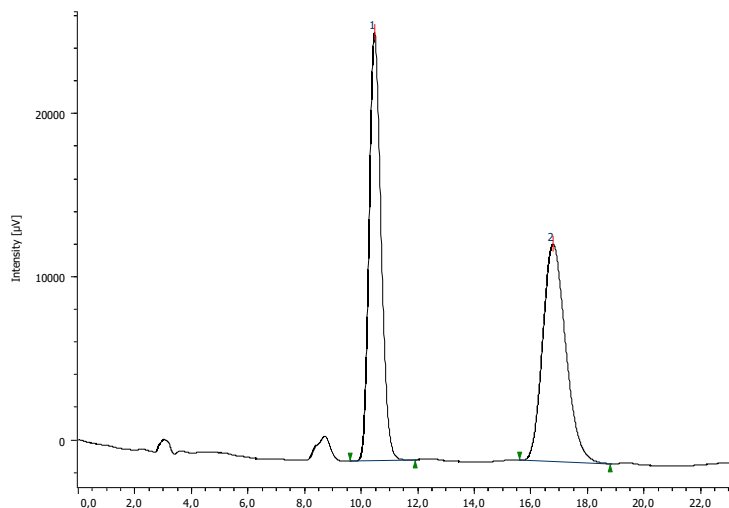

| # | $t_R$  | Area   | Height | Area%  | Height% | Resolution | Symmetry Factor |
|---|--------|--------|--------|--------|---------|------------|-----------------|
| 1 | 10,458 | 766110 | 26189  | 50,634 | 66,299  | 5,637      | 1,183           |
| 2 | 16,758 | 746930 | 13312  | 49,366 | 33,701  | N/A        | 1,219           |

Enantioselective reaction, er = 95:5

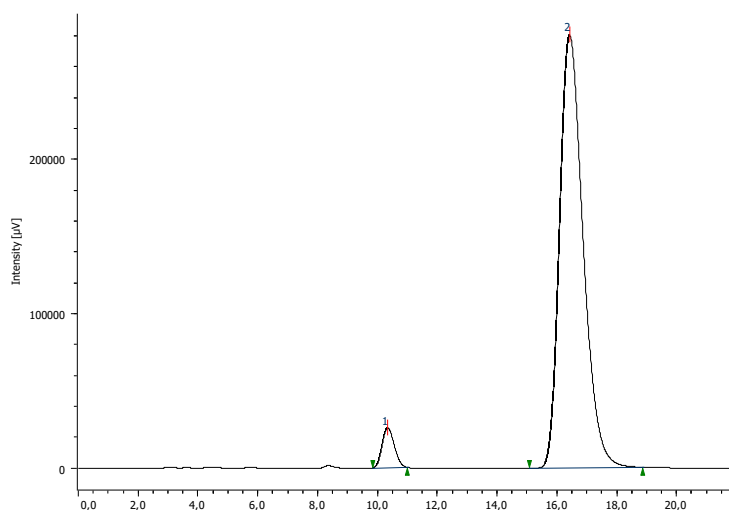

| # | $t_R$  | Area     | Height | Area%  | Height% | Resolution | Symmetry Factor |
|---|--------|----------|--------|--------|---------|------------|-----------------|
| 1 | 10,325 | 735682   | 25839  | 4,605  | 8,451   | 5,563      | 1,164           |
| 2 | 16,400 | 15240398 | 279918 | 95,395 | 91,549  | N/A        | 1,325           |

**(S)-1-(2,6-Dichlorobenzyl)-3-((3,5-dichlorophenyl)amino)-3-((2-fluorophenyl)ethynyl)-5-methylindolin-2-one (9j).**

Phenomenex Lux Cellulose-1, hexane:2-propanol 80:20, 1 mL/min,  $\lambda = 254$  nm,  $t_R$  (major) = 9.7 min,  $t_R$  (minor) = 16.4 min.

Racemic sample

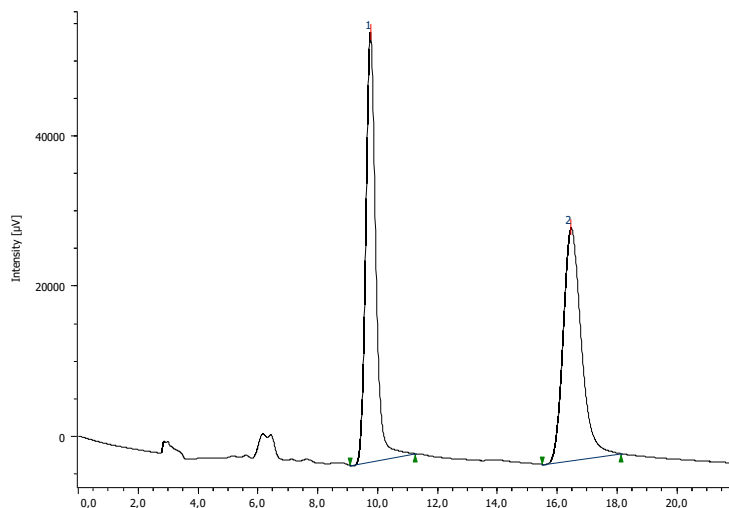

| # | $t_R$  | Area    | Height | Area%  | Height% | Resolution | Symmetry Factor |
|---|--------|---------|--------|--------|---------|------------|-----------------|
| 1 | 9,750  | 1330804 | 57048  | 50,620 | 64,870  | 8,117      | 1,176           |
| 2 | 16,450 | 1298201 | 30894  | 49,380 | 35,130  | N/A        | 1,302           |

Enantioselective reaction, er = 97:3

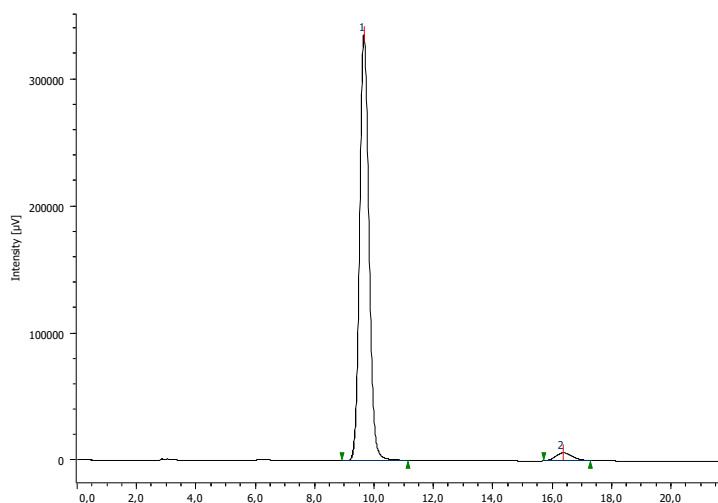

| # | $t_R$  | Area    | Height | Area%  | Height% | Resolution | Symmetry Factor |
|---|--------|---------|--------|--------|---------|------------|-----------------|
| 1 | 9,650  | 7289487 | 334646 | 96,791 | 98,201  | 8,304      | 1,112           |
| 2 | 16,358 | 241706  | 6129   | 3,209  | 1,799   | N/A        | 1,145           |



**(S)-3-(3-((*Tert*-butyldimethylsilyl)oxy)prop-1-yn-1-yl)-1-(2,6-dichlorobenzyl)-3-((3,5-dichlorophenyl)amino)-5-methylindolin-2-one (9k).**

Phenomenex Lux i-Amylose-3, hexane:2-propanol 60:40, 1 mL/min,  $\lambda = 254 \text{ nm}$ ,  $t_R$  (major) = 13.7 min,  $t_R$  (minor) = 23.8 min.

Racemic sample

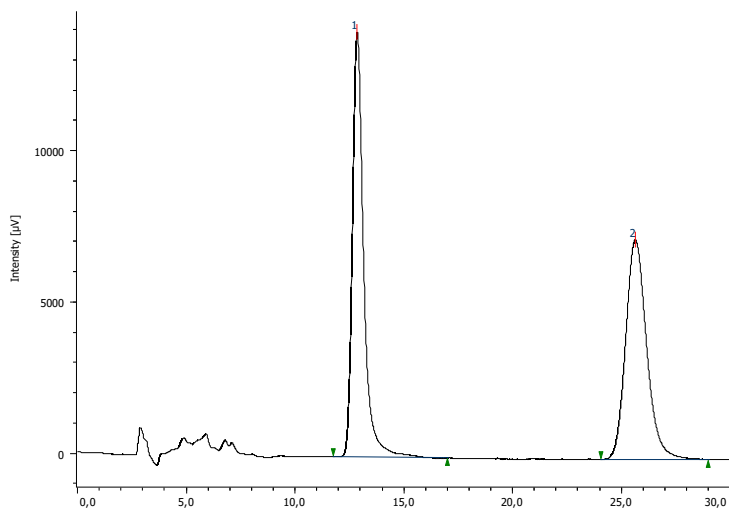

| # | $t_R$  | Area   | Height | Area%  | Height% | Resolution | Symmetry Factor |
|---|--------|--------|--------|--------|---------|------------|-----------------|
| 1 | 12,842 | 501165 | 13992  | 50,765 | 65,927  | 9,909      | 1,421           |
| 2 | 25,617 | 486064 | 7232   | 49,235 | 34,073  | N/A        | 1,183           |

Enantioselective reaction, er = 98:2

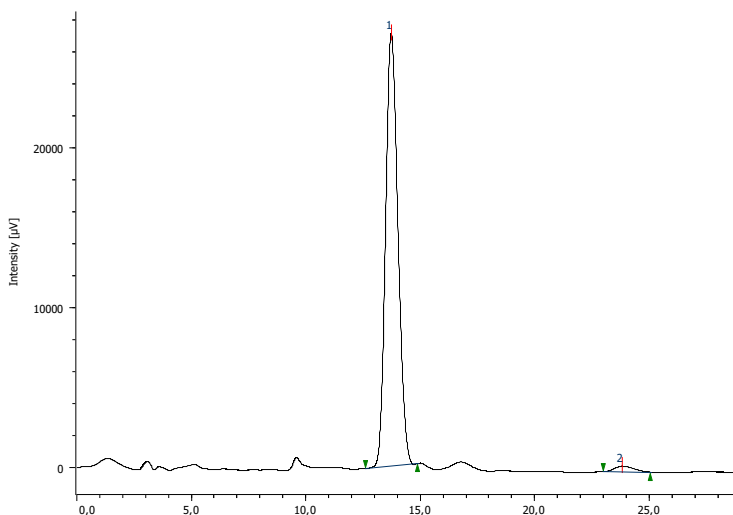

| # | $t_R$  | Area    | Height | Area%  | Height% | Resolution | Symmetry Factor |
|---|--------|---------|--------|--------|---------|------------|-----------------|
| 1 | 13,717 | 1013852 | 27033  | 97,981 | 98,661  | 7,899      | 1,150           |
| 2 | 23,775 | 20894   | 367    | 2,019  | 1,339   | N/A        | 1,320           |

**(S)-1-(2,6-Dichlorobenzyl)-3-((3,5-dichlorophenyl)amino)-3-((2-fluorophenyl)ethynyl)-7-methylindolin-2-one (9I).**

Phenomenex Lux Cellulose-1, hexane:2-propanol 80:20, 1 mL/min,  $\lambda = 254$  nm,  $t_R$  (major) = 16.8 min,  $t_R$  (minor) = 19.4 min.

Racemic sample

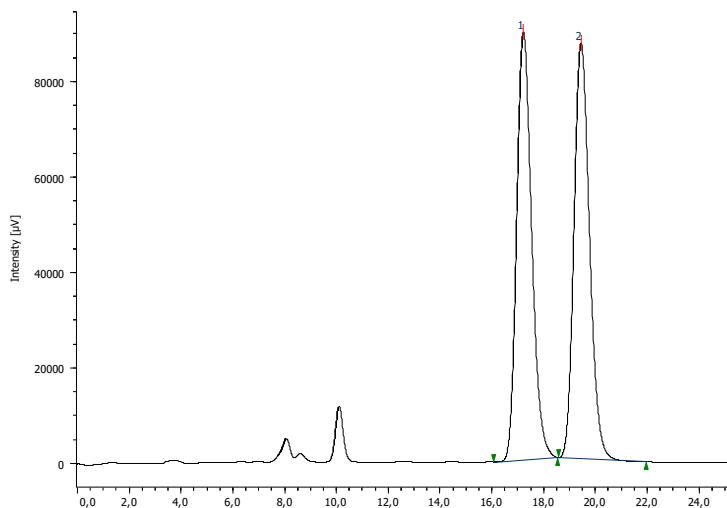

| # | $t_R$  | Area    | Height | Area%  | Height% | Resolution | Symmetry Factor |
|---|--------|---------|--------|--------|---------|------------|-----------------|
| 1 | 17,200 | 3580996 | 89371  | 49,860 | 50,714  | 2,097      | 1,215           |
| 2 | 19,425 | 3601059 | 86854  | 50,140 | 49,286  | N/A        | 1,177           |

Enantioselective reaction, er > 99:1

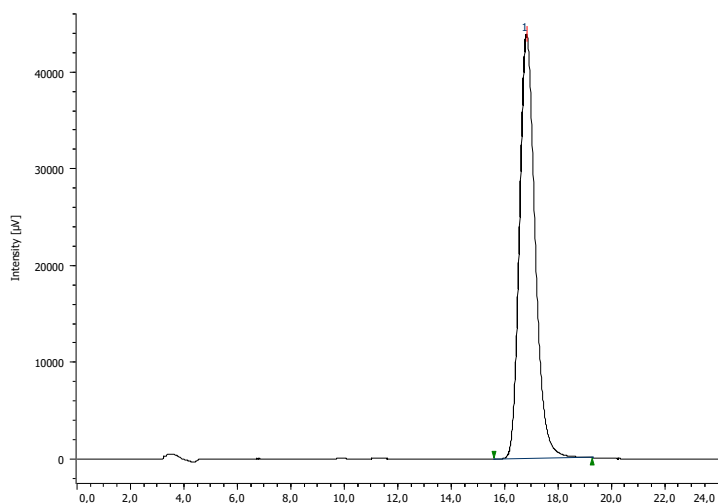

| # | $t_R$  | Area    | Height | Area%   | Height% | Resolution | Symmetry Factor |
|---|--------|---------|--------|---------|---------|------------|-----------------|
| 1 | 16,808 | 1770573 | 43722  | 100,000 | 100,000 | N/A        | 1,219           |

**(S)-3-(3-((*Tert*-butyldimethylsilyl)oxy)prop-1-yn-1-yl)-1-(2,6-dichlorobenzyl)-3-((3,5-dichlorophenyl)amino)-7-methylindolin-2-one (9m).**

Phenomenex Lux i-Amylose-3, hexane:2-propanol 60:40, 1 mL/min,  $\lambda = 254$  nm,  $t_R$  (major) = 16.1 min,  $t_R$  (minor) = 7.6 min.

Racemic sample

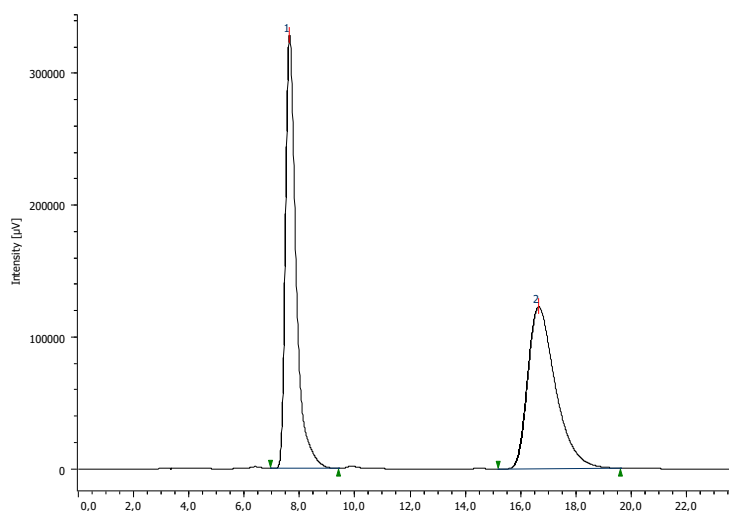

| # | $t_R$  | Area    | Height | Area%  | Height% | Resolution | Symmetry Factor |
|---|--------|---------|--------|--------|---------|------------|-----------------|
| 1 | 7,633  | 8691797 | 327692 | 50,447 | 72,781  | 7,430      | 1,712           |
| 2 | 16,633 | 8537779 | 122549 | 49,553 | 27,219  | N/A        | 1,513           |

Enantioselective reaction, er = 95:5

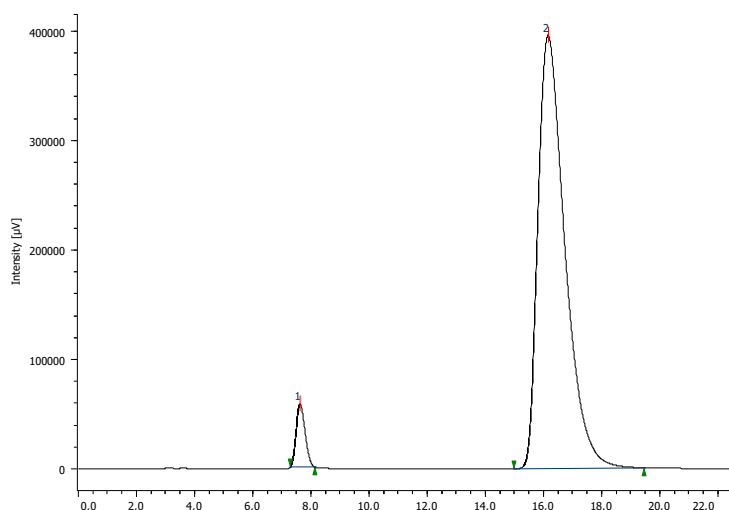

| # | $t_R$  | Area     | Height | Area%  | Height% | Resolution | Symmetry Factor |
|---|--------|----------|--------|--------|---------|------------|-----------------|
| 1 | 7,625  | 1219472  | 57391  | 4,569  | 12,685  | 7,633      | 1,180           |
| 2 | 16,142 | 25471803 | 395038 | 95,431 | 87,315  | N/A        | 1,600           |

## 12. X-Ray structure and crystal data of 2e and 8c

### 12.1. X-Ray structure and crystal data of 2e

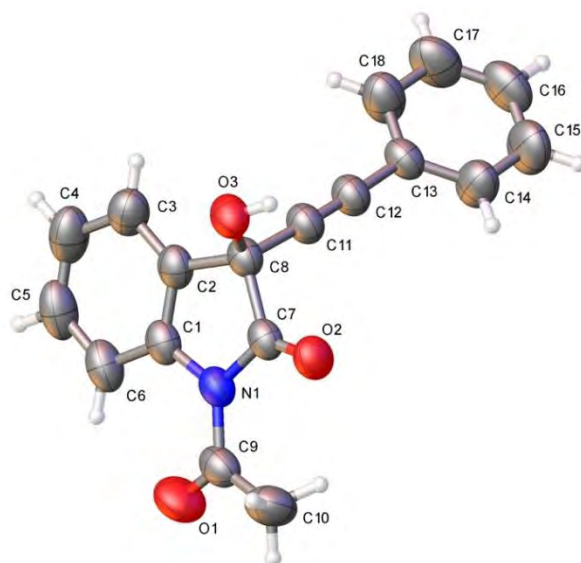

**Table 1** Crystal data and structure refinement for 2e.

|                                    |                                                 |
|------------------------------------|-------------------------------------------------|
| Empirical formula                  | C <sub>18</sub> H <sub>13</sub> NO <sub>3</sub> |
| Formula weight                     | 291.29                                          |
| Temperature/K                      | 296.15                                          |
| Crystal system                     | monoclinic                                      |
| Space group                        | P2 <sub>1</sub>                                 |
| a/Å                                | 11.3533(2)                                      |
| b/Å                                | 5.06800(10)                                     |
| c/Å                                | 13.1835(2)                                      |
| α/°                                | 90                                              |
| β/°                                | 101.957(2)                                      |
| γ/°                                | 90                                              |
| Volume/Å <sup>3</sup>              | 742.10(2)                                       |
| Z                                  | 2                                               |
| ρ <sub>calc</sub> /cm <sup>3</sup> | 1.304                                           |
| μ/mm <sup>-1</sup>                 | 0.731                                           |
| F(000)                             | 304.0                                           |

|                                             |                                                               |
|---------------------------------------------|---------------------------------------------------------------|
| Crystal size/mm <sup>3</sup>                | 0.275 × 0.112 × 0.06                                          |
| Radiation                                   | CuKα (λ = 1.54184)                                            |
| 2θ range for data collection/°              | 6.854 to 151.194                                              |
| Index ranges                                | -12 ≤ h ≤ 14, -6 ≤ k ≤ 5, -16 ≤ l ≤ 16                        |
| Reflections collected                       | 13704                                                         |
| Independent reflections                     | 2887 [R <sub>int</sub> = 0.0272, R <sub>sigma</sub> = 0.0190] |
| Data/restraints/parameters                  | 2887/1/202                                                    |
| Goodness-of-fit on F <sup>2</sup>           | 1.052                                                         |
| Final R indexes [I >= 2σ (I)]               | R <sub>1</sub> = 0.0329, wR <sub>2</sub> = 0.0854             |
| Final R indexes [all data]                  | R <sub>1</sub> = 0.0369, wR <sub>2</sub> = 0.0893             |
| Largest diff. peak/hole / e Å <sup>-3</sup> | 0.11/-0.11                                                    |
| Flack parameter                             | 0.01(13)                                                      |

**Table 4 Bond Lengths for 2e.**

| Atom | Atom | Length/Å  | Atom | Atom | Length/Å  |
|------|------|-----------|------|------|-----------|
| O1   | C9   | 1.205 (3) | C5   | C6   | 1.385 (4) |
| O2   | C7   | 1.205 (2) | C7   | C8   | 1.548 (3) |
| O3   | C8   | 1.407 (3) | C8   | C11  | 1.473 (3) |
| N1   | C1   | 1.434 (3) | C9   | C10  | 1.478 (4) |
| N1   | C7   | 1.400 (2) | C11  | C12  | 1.190 (3) |
| N1   | C9   | 1.419 (3) | C12  | C13  | 1.440 (3) |
| C1   | C2   | 1.383 (3) | C13  | C14  | 1.372 (4) |
| C1   | C6   | 1.392 (3) | C13  | C18  | 1.371 (4) |
| C2   | C3   | 1.377 (3) | C14  | C15  | 1.385 (3) |
| C2   | C8   | 1.504 (3) | C15  | C16  | 1.363 (4) |
| C3   | C4   | 1.397 (4) | C16  | C17  | 1.359 (5) |
| C4   | C5   | 1.377 (5) | C17  | C18  | 1.387 (4) |

**Table 5 Bond Angles for 2e.**

| Atom | Atom | Atom | Angle/°    | Atom | Atom | Atom | Angle/°    |
|------|------|------|------------|------|------|------|------------|
| C7   | N1   | C1   | 109.26(17) | O3   | C8   | C11  | 113.04(17) |
| C7   | N1   | C9   | 126.64(18) | C2   | C8   | C7   | 101.84(16) |
| C9   | N1   | C1   | 124.09(17) | C11  | C8   | C2   | 110.14(16) |
| C2   | C1   | N1   | 110.00(16) | C11  | C8   | C7   | 109.62(18) |
| C2   | C1   | C6   | 120.8(2)   | O1   | C9   | N1   | 118.9(2)   |
| C6   | C1   | N1   | 129.2(2)   | O1   | C9   | C10  | 122.5(3)   |
| C1   | C2   | C8   | 110.00(19) | N1   | C9   | C10  | 118.6(2)   |
| C3   | C2   | C1   | 121.9(2)   | C12  | C11  | C8   | 176.3(2)   |
| C3   | C2   | C8   | 128.1(2)   | C11  | C12  | C13  | 178.0(3)   |
| C2   | C3   | C4   | 117.8(3)   | C14  | C13  | C12  | 120.7(2)   |
| C5   | C4   | C3   | 119.9(3)   | C18  | C13  | C12  | 120.2(2)   |
| C4   | C5   | C6   | 122.8(2)   | C18  | C13  | C14  | 119.1(2)   |
| C5   | C6   | C1   | 116.8(3)   | C13  | C14  | C15  | 120.3(3)   |
| O2   | C7   | N1   | 127.0(2)   | C16  | C15  | C14  | 120.2(3)   |
| O2   | C7   | C8   | 124.60(18) | C17  | C16  | C15  | 119.9(2)   |
| N1   | C7   | C8   | 108.40(16) | C16  | C17  | C18  | 120.2(3)   |
| O3   | C8   | C2   | 111.27(18) | C13  | C18  | C17  | 120.3(3)   |
| O3   | C8   | C7   | 110.37(16) |      |      |      |            |

**Crystal structure determination of 2e**

**Crystal Data** for  $C_{18}H_{13}NO_3$  ( $M=291.29$  g/mol): monoclinic, space group  $P2_1$  (no. 4),  $a = 11.3533(2)$  Å,  $b = 5.06800(10)$  Å,  $c = 13.1835(2)$  Å,  $\beta = 101.957(2)^\circ$ ,  $V = 742.10(2)$  Å<sup>3</sup>,  $Z = 2$ ,  $T = 296.15$  K,  $\mu(\text{CuK}\alpha) = 0.731$  mm<sup>-1</sup>,  $D_{\text{calc}} = 1.304$  g/cm<sup>3</sup>, 13704 reflections measured ( $6.854^\circ \leq 2\theta \leq 151.194^\circ$ ), 2887 unique ( $R_{\text{int}} = 0.0272$ ,  $R_{\text{sigma}} = 0.0190$ ) which were used in all calculations. The final  $R_1$  was 0.0329 ( $I > 2\sigma(I)$ ) and  $wR_2$  was 0.0893 (all data).

**12.2. X-Ray structure and crystal data of 8c.**

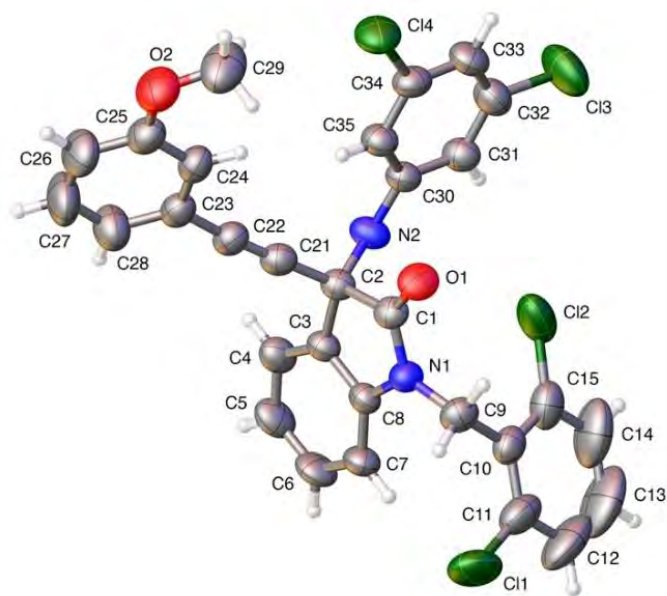

**Table 1. Crystal Data and Structure Refinement for 8c.**

|                                    |                                                                               |
|------------------------------------|-------------------------------------------------------------------------------|
| Empirical formula                  | C <sub>30</sub> H <sub>20</sub> Cl <sub>4</sub> N <sub>2</sub> O <sub>2</sub> |
| Formula weight                     | 582.28                                                                        |
| Temperature/K                      | 298.15                                                                        |
| Crystal system                     | monoclinic                                                                    |
| Space group                        | P2 <sub>1</sub>                                                               |
| a/Å                                | 12.1758(3)                                                                    |
| b/Å                                | 5.34020(10)                                                                   |
| c/Å                                | 21.8778(6)                                                                    |
| α/°                                | 90                                                                            |
| β/°                                | 101.147(3)                                                                    |
| γ/°                                | 90                                                                            |
| Volume/Å <sup>3</sup>              | 1395.68(6)                                                                    |
| Z                                  | 2                                                                             |
| ρ <sub>calc</sub> /cm <sup>3</sup> | 1.386                                                                         |
| μ/mm <sup>-1</sup>                 | 4.102                                                                         |
| F(000)                             | 596.0                                                                         |
| Crystal size/mm <sup>3</sup>       | 0.411 × 0.052 × 0.045                                                         |
| Radiation                          | Cu Kα (λ = 1.54184)                                                           |
| 2θ range for data collection/°     | 7.4 to 150.118                                                                |

|                                             |                                                               |
|---------------------------------------------|---------------------------------------------------------------|
| Index ranges                                | -15 ≤ h ≤ 15, -6 ≤ k ≤ 6, -27 ≤ l ≤ 18                        |
| Reflections collected                       | 9628                                                          |
| Independent reflections                     | 5556 [R <sub>int</sub> = 0.0237, R <sub>sigma</sub> = 0.0355] |
| Data/restraints/parameters                  | 5556/49/348                                                   |
| Goodness-of-fit on F <sup>2</sup>           | 1.049                                                         |
| Final R indexes [I>=2σ (I)]                 | R <sub>1</sub> = 0.0453, wR <sub>2</sub> = 0.1124             |
| Final R indexes [all data]                  | R <sub>1</sub> = 0.0528, wR <sub>2</sub> = 0.1189             |
| Largest diff. peak/hole / e Å <sup>-3</sup> | 0.33/-0.51                                                    |
| Flack parameter                             | -0.004(9)                                                     |

**Table 2. Bond Lengths for 8c.**

| Atom | Atom | Length/Å | Atom | Atom | Length/Å  |
|------|------|----------|------|------|-----------|
| Cl1  | C11  | 1.738(7) | C9   | C10  | 1.506(6)  |
| Cl2  | C15  | 1.741(6) | C10  | C11  | 1.394(7)  |
| Cl3  | C32  | 1.738(5) | C10  | C15  | 1.392(7)  |
| Cl4  | C34  | 1.740(5) | C11  | C12  | 1.374(10) |
| O1   | C1   | 1.217(5) | C12  | C13  | 1.365(14) |
| O2   | C25  | 1.356(6) | C13  | C14  | 1.383(14) |
| O2   | C29  | 1.391(7) | C14  | C15  | 1.382(9)  |
| N1   | C1   | 1.361(5) | C21  | C22  | 1.193(6)  |
| N1   | C8   | 1.405(5) | C22  | C23  | 1.437(6)  |
| N1   | C9   | 1.456(5) | C23  | C24  | 1.395(6)  |
| N2   | C2   | 1.467(5) | C23  | C28  | 1.381(7)  |
| N2   | C30  | 1.396(5) | C24  | C25  | 1.386(6)  |
| C1   | C2   | 1.561(5) | C25  | C26  | 1.367(8)  |
| C2   | C3   | 1.514(5) | C26  | C27  | 1.363(9)  |
| C2   | C21  | 1.465(5) | C27  | C28  | 1.387(8)  |
| C3   | C4   | 1.370(6) | C30  | C31  | 1.386(6)  |
| C3   | C8   | 1.384(5) | C30  | C35  | 1.400(6)  |
| C4   | C5   | 1.392(6) | C31  | C32  | 1.380(6)  |



**Table 2. Bond Lengths for 8c.**

| Atom | Atom | Length/Å | Atom | Atom | Length/Å |
|------|------|----------|------|------|----------|
| C5   | C6   | 1.372(7) | C32  | C33  | 1.379(7) |
| C6   | C7   | 1.389(7) | C33  | C34  | 1.371(7) |
| C7   | C8   | 1.384(5) | C34  | C35  | 1.382(6) |

**Table 3. Bond Angles for 8c.**

| Atom | Atom | Atom | Angle/°  | Atom | Atom | Atom | Angle/°  |
|------|------|------|----------|------|------|------|----------|
| C25  | O2   | C29  | 118.1(4) | C13  | C12  | C11  | 119.5(8) |
| C1   | N1   | C8   | 111.5(3) | C12  | C13  | C14  | 120.6(7) |
| C1   | N1   | C9   | 121.6(3) | C15  | C14  | C13  | 119.3(8) |
| C8   | N1   | C9   | 126.9(3) | C10  | C15  | Cl2  | 120.2(4) |
| C30  | N2   | C2   | 124.2(3) | C14  | C15  | Cl2  | 118.2(6) |
| O1   | C1   | N1   | 125.4(4) | C14  | C15  | C10  | 121.6(7) |
| O1   | C1   | C2   | 126.7(3) | C22  | C21  | C2   | 179.2(5) |
| N1   | C1   | C2   | 107.7(3) | C21  | C22  | C23  | 174.0(5) |
| N2   | C2   | C1   | 109.1(3) | C24  | C23  | C22  | 118.2(4) |
| N2   | C2   | C3   | 109.5(3) | C28  | C23  | C22  | 122.0(4) |
| C3   | C2   | C1   | 101.3(3) | C28  | C23  | C24  | 119.9(4) |
| C21  | C2   | N2   | 112.2(3) | C25  | C24  | C23  | 120.1(4) |
| C21  | C2   | C1   | 111.1(3) | O2   | C25  | C24  | 124.6(5) |
| C21  | C2   | C3   | 113.0(3) | O2   | C25  | C26  | 115.8(5) |
| C4   | C3   | C2   | 129.8(4) | C26  | C25  | C24  | 119.6(5) |
| C4   | C3   | C8   | 121.1(4) | C27  | C26  | C25  | 120.3(5) |
| C8   | C3   | C2   | 109.1(3) | C26  | C27  | C28  | 121.5(5) |
| C3   | C4   | C5   | 117.9(4) | C23  | C28  | C27  | 118.6(5) |
| C6   | C5   | C4   | 121.0(4) | N2   | C30  | C35  | 122.1(4) |
| C5   | C6   | C7   | 121.3(4) | C31  | C30  | N2   | 119.2(4) |
| C8   | C7   | C6   | 117.2(4) | C31  | C30  | C35  | 118.6(4) |
| C3   | C8   | N1   | 110.0(3) | C32  | C31  | C30  | 119.3(4) |
| C3   | C8   | C7   | 121.4(4) | C31  | C32  | Cl3  | 118.7(4) |
| C7   | C8   | N1   | 128.6(4) | C33  | C32  | Cl3  | 118.0(4) |

**Table 3. Bond Angles for 8c.**

| Atom Atom Atom | Angle/°  | Atom Atom Atom | Angle/°  |
|----------------|----------|----------------|----------|
| N1 C9 C10      | 113.9(4) | C33 C32 C31    | 123.3(4) |
| C11 C10 C9     | 121.6(5) | C34 C33 C32    | 116.4(4) |
| C15 C10 C9     | 121.5(4) | C33 C34 Cl4    | 119.2(3) |
| C15 C10 C11    | 116.9(5) | C33 C34 C35    | 122.8(4) |
| C10 C11 Cl1    | 120.1(4) | C35 C34 Cl4    | 118.1(4) |
| C12 C11 Cl1    | 117.8(6) | C34 C35 C30    | 119.6(4) |
| C12 C11 C10    | 122.1(7) |                |          |

**Crystal structure determination of 8c**

**Crystal Data.** C<sub>30</sub>H<sub>20</sub>Cl<sub>4</sub>N<sub>2</sub>O<sub>2</sub> (*M* = 582.28 g/mol): monoclinic, space group P2<sub>1</sub> (no. 4), *a* = 12.1758(3) Å, *b* = 5.34020(10) Å, *c* = 21.8778(6) Å,  $\beta$  = 101.147(3)°, *V* = 1395.68(6) Å<sup>3</sup>, *Z* = 2, *T* = 298.15 K,  $\mu$ (Cu K $\alpha$ ) = 4.102 mm<sup>-1</sup>, *D*<sub>calc</sub> = 1.386 g/cm<sup>3</sup>, 9628 reflections measured (7.4° ≤ 2 $\theta$  ≤ 150.118°), 5556 unique (*R*<sub>int</sub> = 0.0237, *R*<sub>sigma</sub> = 0.0355) which were used in all calculations. The final *R*<sub>1</sub> was 0.0453 (*I* > 2 $\sigma$ (*I*)) and *wR*<sub>2</sub> was 0.1189 (all data).
